# Supplementary material for: New molecular insights on the response of the green alga Tetraselmis suecica to nitrogen starvation
Source: PubMed Central journal article supplement (PMC6399242; doi:10.1038/s41598-019-39860-5), 2019-03-04
Supplement: 41598_2019_39860_MOESM1_ESM.pdf [file 41598_2019_39860_MOESM1_ESM.pdf]

# **New molecular insights on the response of the green alga *Tetraselmis suecica* to nitrogen starvation**

Chiara Lauritano<sup>1\*</sup>, Daniele De Luca<sup>2</sup>, Mariano Amoroso<sup>1</sup>, Salvatore Benfatto<sup>3</sup>, Simone Maestri<sup>3</sup>,  
Claudia Racioppi<sup>1,4</sup>, Francesco Esposito<sup>1</sup>, Adrianna Ianora<sup>1\*</sup>

<sup>1</sup> Marine Biotechnology Department, Stazione Zoologica Anton Dohrn, Villa Comunale, 80121, Napoli, Italy

<sup>2</sup> Integrative Marine Ecology Department, Stazione Zoologica Anton Dohrn, Villa Comunale, 80121, Napoli, Italy

<sup>3</sup> Università degli Studi di Verona, Ca' Vignal 1 Strada Le Grazie 15, 37134, Verona, Italy

<sup>4</sup> Center for Developmental Genetics, Department of Biology, College of Arts and Science, New York University, New York, USA

\*Corresponding authors:

Chiara Lauritano, Marine Biotechnology Department, Stazione Zoologica Anton Dohrn, Villa Comunale, 80121, Napoli, Italy; [chiara.lauritano@szn.it](mailto:chiara.lauritano@szn.it); Tel: 00395833221; Fax: 0039 0817641355

Adrianna Ianora, Marine Biotechnology Department, Stazione Zoologica Anton Dohrn, Villa Comunale, 80121, Napoli, Italy; [adrianna.ianora@szn.it](mailto:adrianna.ianora@szn.it); Tel: 00395833246; Fax: 0039 0817641355

## Supplementary information

**Figure S1** Histograms of GO classifications showing sequence distribution of total transcripts within cellular component (a), biological process (b) and molecular function (c). The y-axis indicates the percentage of sequences for each category.

**Table S1** List of selected reference genes (RG) and genes of interest (GOI) with their abbreviations (Abbr), functions, primer's sequences and efficiencies.

**Table S2** Reference genes ranking from the most to the least stable according to NormFinder, BestKeeper and Genorm softwares.

**Table S3** BUSCO analysis results. Lineage dataset eukariota\_odb9 was used. Out of 303 BUSCOs 68.4% complete entries were identified (44.6% single and 23.8% duplicated) and 4.0% were detected as fragments.

**Table S4** List of KEGG pathways associated to contigs with assigned enzyme codes in differentially regulated genes. The table contains pathway names, pathway ID, number of enzymes found for each pathway, enzyme codes and sequence names.

**Table S5** DEG id, log<sub>2</sub> Fold Change, adjusted P value (padj), sequence description and enzyme codes ( $|\text{LogFC}| > 2$ ,  $\text{padj} \leq 0.01$ ).

**Table S6** List of nitrilase and nitrilase-like sequences retrieved from public repositories utilised to generate the ML tree.

**Figure S1.** Histograms of GO classifications showing sequence distribution of total transcripts within cellular component (a), biological process (b) and molecular function (c). The y-axis indicates the percentage of sequences for each category.

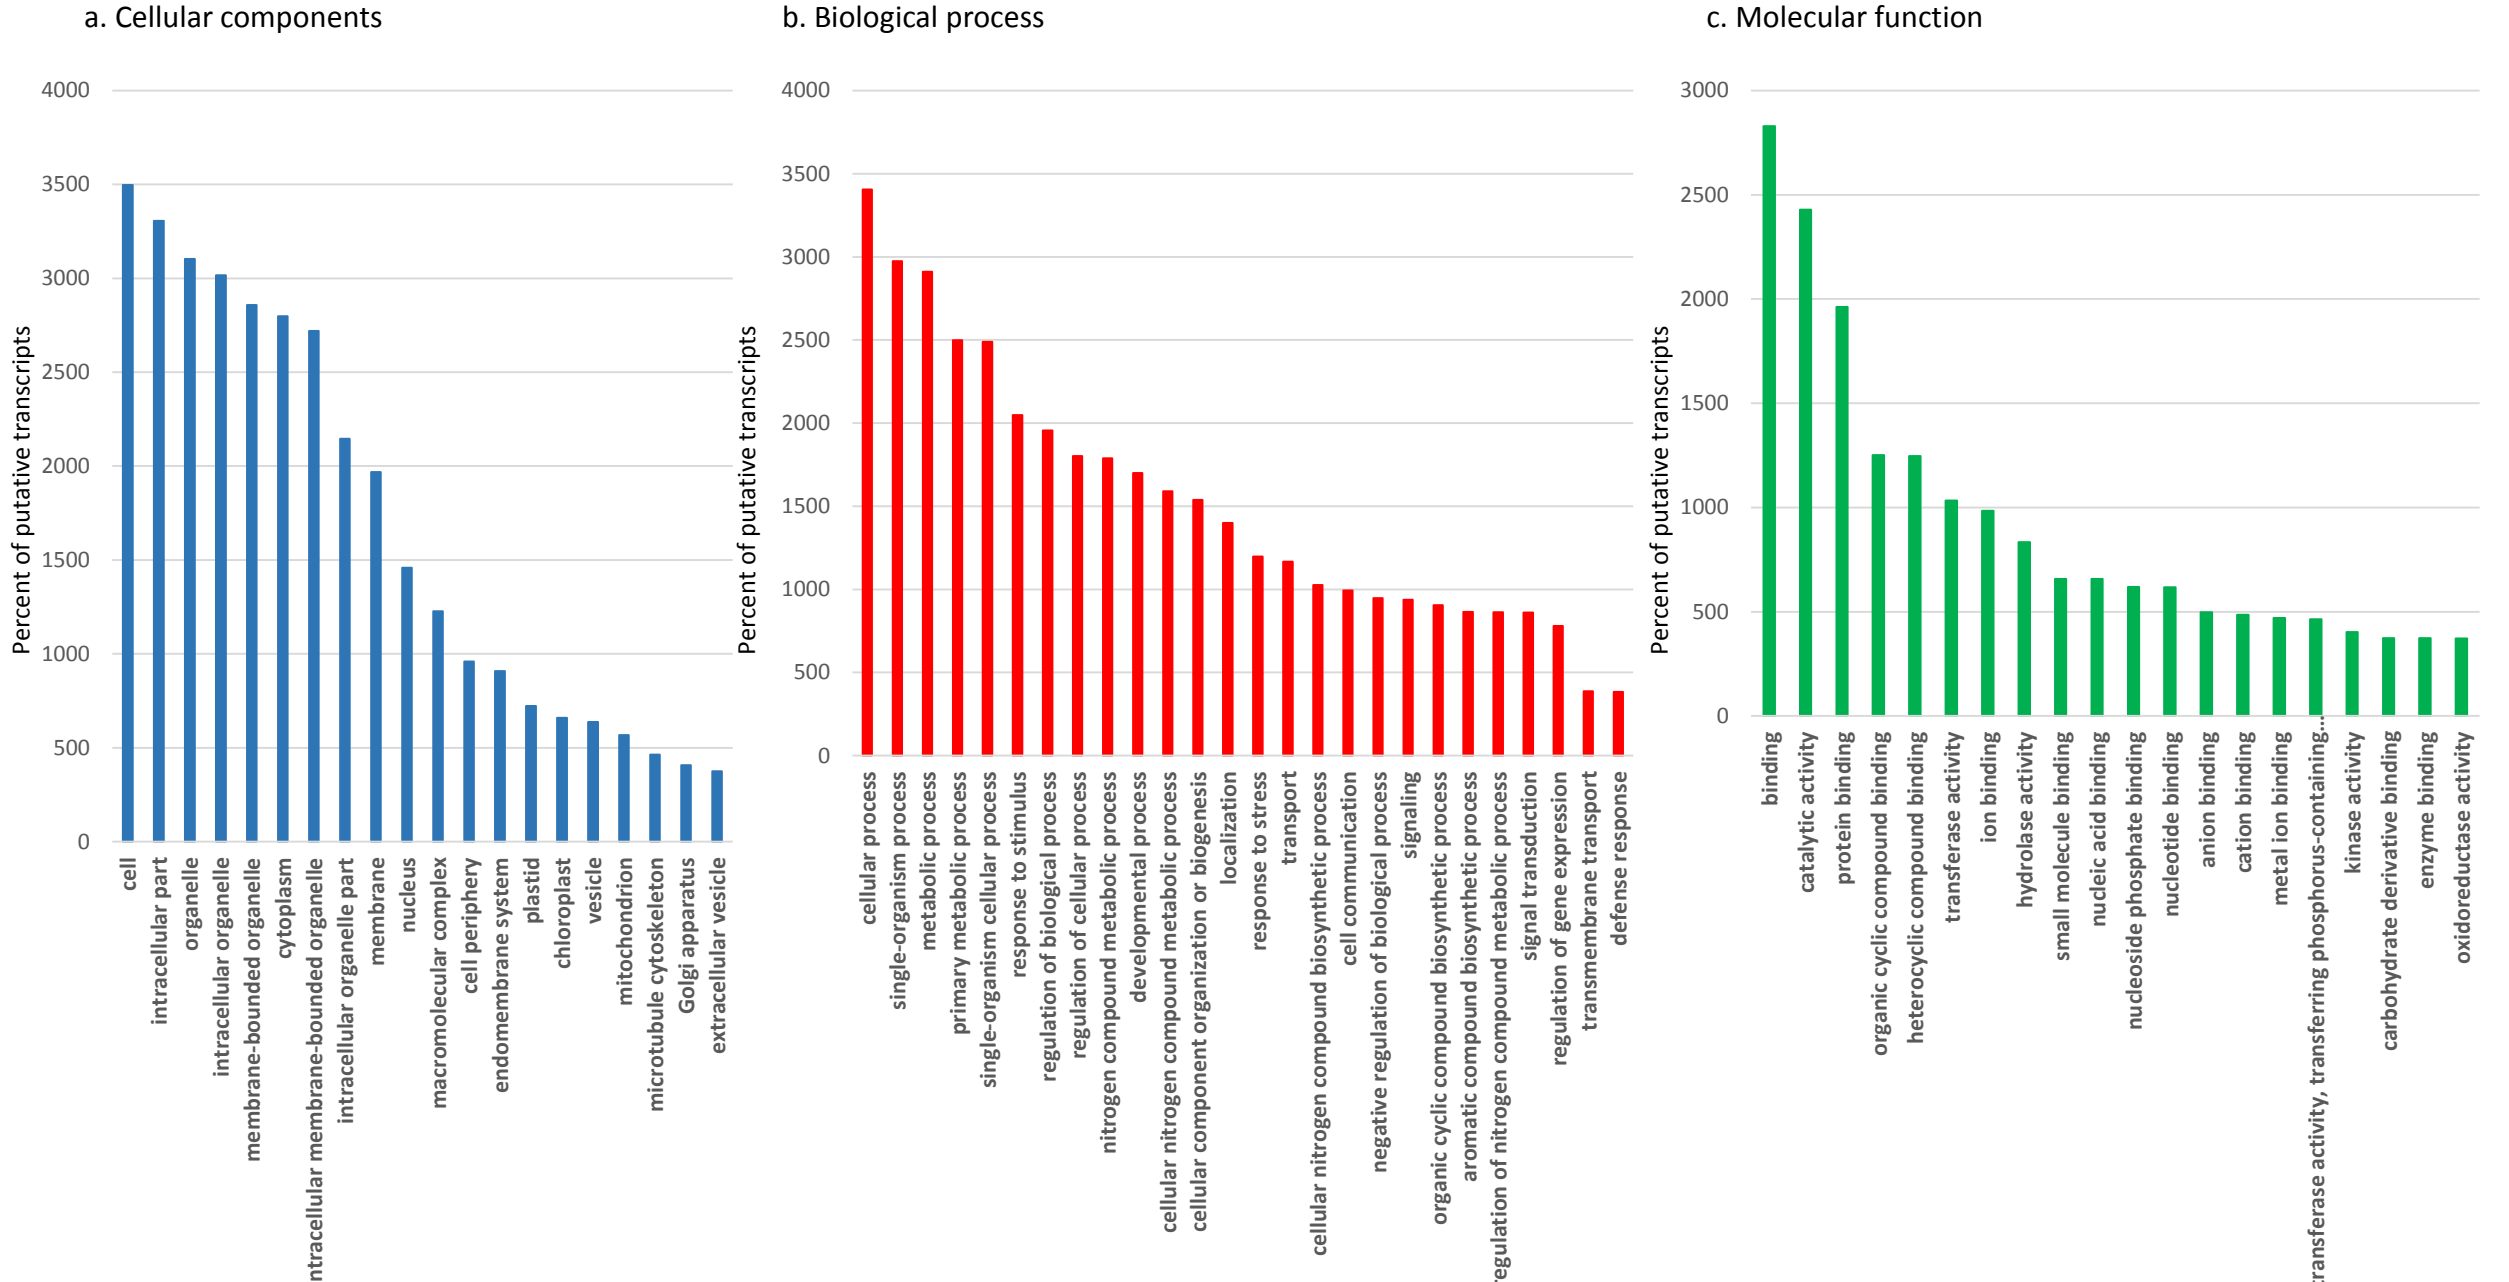

**Table S1.** List of selected reference genes (RG) and genes of interest (GOI) with their abbreviations (Abbr), functions, primer's sequences and efficiencies.

| Gene Name                                | Abbr   | Function                                  | Primer F                | Primer R              | E |
|------------------------------------------|--------|-------------------------------------------|-------------------------|-----------------------|---|
| <i>Reference Genes (RGs)</i>             |        |                                           |                         |                       |   |
| Actin                                    | ACT    | Cytoskeleton microfilaments               | CACATCTGCTGGAAGGTCGA    | GCATTGCGGACCGTATGAAC  | 2 |
| $\alpha$ tubulin                         | ATUB   | Microtubule subunit                       | AAATGGATGCGTGGGTAGGG    | CCCACGTACACCAACCTGAA  | 2 |
| $\beta$ tubulin                          | BTUB   | Microtubule subunit                       | AATGCAGACGAGGAAAGGGG    | TTATCTCCGCCGTCATGTCTG | 2 |
| Glyceraldehyde 3-phosphate dehydrogenase | GAPDH  | Glycolysis                                | GGCGTGTACTGTGGTCATCA    | TGTGATGGGTGTGAACGAGG  | 2 |
| Histone 1                                | H1     | Packaging DNA in nucleosomes              | GCTGAACCGCCAAAACCTTT    | TCACCCCAAGTACGAGGTCA  | 2 |
| Histone 4                                | H4     | Packaging DNA in nucleosomes              | TGGATGGCGCAAAGGTTAGT    | TCTACCGAGCTCCTCATCCG  | 2 |
| <i>Genes Of Interest (GOI)</i>           |        |                                           |                         |                       |   |
| Polyketide synthase                      | PKS    | Polyketide synthesis                      | CCCAAACGGTCCATCACAGA    | AGCAAGACTTGACTGAGCCC  | 2 |
| Lipoxygenase                             | LPX    | Lipid metabolism                          | CTCGACAAGAACCACGACGA    | CGCTCGAAGTTATCCCTGCT  | 2 |
| Squamosa promoter binding protein        | SBP    | Transcription factor                      | CAGAGTGTGCGTCGAGTGTA    | GTCCCGTCAAAGTCACCGAT  | 2 |
| Elmo-domain-containing protein 3         | ELMOD3 | Acts as a GTPase-activating protein (GAP) | GGTAGAGGAGCTGCATGAGG    | ACTTCAAGATCCTGTCGGCC  | 2 |
| 3'5-cyclic nucleotide phosphodiesterase  | PDE    | Purine metabolism                         | CGTTGAGGCTGTGCATTTCC    | TGTTAACGCGCTCAACTTGC  | 2 |
| ATP-binding cassette protein transporter | ABC    | Transporter                               | GGCTGTACTIONCCGATCCCAAG | TGATCTCGTGCATGCTCCAG  | 2 |
| Protein phosphatase 2c family            | PP2C   | Serine/threonine specific                 | AGCCTGTTCTGTGCATGAT     | CCGCACGTCACACAGGTAA   | 2 |

| protein                                            |       | protein phosphatases                                                |                       |                      |   |
|----------------------------------------------------|-------|---------------------------------------------------------------------|-----------------------|----------------------|---|
| Calcium/calmodulin-dependent protein kinase type 1 | CAMK  | Calcium-triggered CaMKK-CaMK1 signaling cascade                     | TCGAAAGGCTGCCGTATTGT  | GCACGAGAGATTATCCGCCA | 2 |
| Phosphoenolpyruvate carboxylase kinase             | PPCK  | Light-dependent phosphoenolpyruvate carboxylase phosphorylation     | TTCCTTGGTCGCCGTGTATC  | GCACGGCGACATAAAACCTG | 2 |
| Heat shock protein 20                              | HSP20 | Stress response                                                     | CTGCCCTTCGTTTCGTCATCT | GAAGGACGAGGATGGCGAG  | 2 |
| Ammonium transporter                               | AMT   | Transporter                                                         | AAGCAATCCTGTCGCCAAGA  | TTCGAGCCCTACATAGCCCT | 2 |
| Catalase                                           | CAT   | Antioxidant                                                         | AGGTCCACGAACTTCACAGC  | GTGACCTCCGCTGATATGGG | 2 |
| Glutathione-S-transferase                          | GST   | Antioxidant                                                         | CACCGTGTTCGACAGCTTCT  | GAGCATCTTCGACTCGCAGT | 2 |
| Nitrilase                                          | NIT1  | Catalyse the hydrolysis of nitriles to carboxylic acids and ammonia | TAGCTCTGCGTCTCGATTGC  | TGCTATGACCTTCGCTTCCC | 2 |

---

**Table S2.** Reference genes ranking from the most to the least stable according to NormFinder, BestKeeper and Genorm softwares. The best RGs identified are represented in bold.

| Ranking | NormFinder       | Genorm                            | BestKeeper       |
|---------|------------------|-----------------------------------|------------------|
| 1       | <b>Histone 1</b> | <b>Actin</b>                      | <b>Actin</b>     |
| 2       | $\beta$ tubulin  | <b><math>\beta</math> tubulin</b> | Histone 4        |
| 3       | GAPDH            | Histone 1                         | $\beta$ tubulin  |
| 4       | Actin            | GAPDH                             | Histone 1        |
| 5       | $\alpha$ tubulin | Histone 4                         | GAPDH            |
| 6       | Histone 4        | $\alpha$ tubulin                  | $\alpha$ tubulin |

**Table S3.** BUSCO analysis results. Lineage dataset eukariota\_odb9 was used. Out of 303 BUSCOs 68.4% complete entries were identified (44.6% single and 23.8% duplicated) and 4.0% were detected as fragments.

| # Busco id  | Status     | Sequence                                                          | Score  | Length |
|-------------|------------|-------------------------------------------------------------------|--------|--------|
| EOG0937004M | Complete   | Sample3_Locus_11118_Transcript_1_2_Confidence_0.667_Length_3004   | 1440.8 | 826    |
| EOG09370082 | Complete   | Sample1_Locus_20518_Transcript_3_3_Confidence_0.000_Length_3552   | 1705.5 | 1046   |
| EOG093700N7 | Fragmented | SampleTS1_Locus_17730_Transcript_3_4_Confidence_0.400_Length_1023 | 462.6  | 295    |
| EOG0937017X | Complete   | Sample3_Locus_4090_Transcript_10_14_Confidence_0.353_Length_4125  | 842.8  | 1281   |
| EOG0937018Z | Complete   | Sample6_Locus_980_Transcript_11_12_Confidence_0.214_Length_3072   | 1098.3 | 798    |
| EOG0937019B | Complete   | Sample1_Locus_13436_Transcript_4_7_Confidence_0.200_Length_2137   | 1188.9 | 662    |
| EOG093701EE | Complete   | Sample1_Locus_2485_Transcript_2_3_Confidence_0.333_Length_3529    | 730.2  | 740    |
| EOG093701IQ | Duplicated | Sample1_Locus_17374_Transcript_1_2_Confidence_0.333_Length_997    | 361.8  | 246    |
| EOG093701IQ | Duplicated | Sample6_Locus_10491_Transcript_7_7_Confidence_0.125_Length_4037   | 326.3  | 394    |
| EOG093701IQ | Duplicated | Sample6_Locus_6166_Transcript_4_5_Confidence_0.400_Length_3519    | 357.9  | 362    |
| EOG093701S0 | Complete   | Sample6_Locus_19560_Transcript_2_3_Confidence_0.333_Length_2582   | 1053.6 | 703    |
| EOG093701SQ | Complete   | Sample6_Locus_722_Transcript_2_13_Confidence_0.026_Length_1793    | 924.1  | 537    |
| EOG093701V7 | Fragmented | Sample1_Locus_6950_Transcript_1_1_Confidence_0.000_Length_844     | 333.5  | 223    |
| EOG0937029K | Complete   | Sample6_Locus_1890_Transcript_5_7_Confidence_0.143_Length_4516    | 298.5  | 602    |
| EOG093702AT | Fragmented | Sample6_Locus_3889_Transcript_3_5_Confidence_0.375_Length_822     | 192.3  | 134    |
| EOG093702DP | Fragmented | SampleTS1_Locus_3621_Transcript_2_4_Confidence_0.143_Length_620   | 155.5  | 174    |
| EOG093702MJ | Complete   | Sample1_Locus_1240_Transcript_5_7_Confidence_0.125_Length_2907    | 258.8  | 433    |
| EOG093702PE | Fragmented | SampleTS1_Locus_1308_Transcript_2_3_Confidence_0.400_Length_666   | 57.1   | 85     |
| EOG0937033T | Complete   | Sample6_Locus_1784_Transcript_26_30_Confidence_0.000_Length_2728  | 119.2  | 345    |
| EOG0937036L | Fragmented | SampleTS1_Locus_24681_Transcript_1_2_Confidence_0.333_Length_976  | 269.1  | 244    |
| EOG093703C8 | Complete   | Sample6_Locus_10055_Transcript_3_5_Confidence_0.400_Length_2109   | 718.8  | 496    |
| EOG093703DY | Complete   | Sample6_Locus_15394_Transcript_3_8_Confidence_0.091_Length_1439   | 174.1  | 260    |
| EOG093703N5 | Fragmented | SampleTS2_Locus_15206_Transcript_1_1_Confidence_0.000_Length_646  | 65.4   | 107    |
| EOG093703UX | Complete   | Sample6_Locus_7364_Transcript_2_3_Confidence_0.333_Length_2406    | 889    | 592    |
| EOG093703W1 | Fragmented | Sample6_Locus_7766_Transcript_4_9_Confidence_0.111_Length_1615    | 122.4  | 275    |

|             |            |                                                                    |       |     |
|-------------|------------|--------------------------------------------------------------------|-------|-----|
| EOG093703WD | Complete   | Sample1_Locus_20679_Transcript_7_7_Confidence_0.143_Length_2696    | 549.9 | 586 |
| EOG093703YA | Complete   | Sample3_Locus_23468_Transcript_1_4_Confidence_0.100_Length_1497    | 530   | 412 |
| EOG0937049Y | Fragmented | SampleTS1_Locus_21779_Transcript_1_1_Confidence_0.000_Length_378   | 43.1  | 73  |
| EOG093704GD | Duplicated | Sample3_Locus_9915_Transcript_1_3_Confidence_0.667_Length_653      | 153.5 | 177 |
| EOG093704GD | Duplicated | Sample6_Locus_825_Transcript_2_4_Confidence_0.500_Length_878       | 137.9 | 182 |
| EOG093704HC | Complete   | Sample1_Locus_10788_Transcript_1_1_Confidence_0.000_Length_1565    | 729.9 | 396 |
| EOG093704J7 | Missing    |                                                                    |       |     |
| EOG093704Q0 | Complete   | SampleTS3_Locus_2622_Transcript_10_32_Confidence_0.074_Length_1553 | 327.6 | 270 |
| EOG093704UY | Missing    |                                                                    |       |     |
| EOG0937050C | Complete   | Sample1_Locus_15155_Transcript_4_5_Confidence_0.286_Length_1354    | 312.8 | 346 |
| EOG093705DM | Complete   | Sample3_Locus_7619_Transcript_2_4_Confidence_0.400_Length_1120     | 335.8 | 281 |
| EOG093705E5 | Complete   | Sample6_Locus_18230_Transcript_3_7_Confidence_0.364_Length_1443    | 227.1 | 342 |
| EOG093705EY | Complete   | Sample1_Locus_1466_Transcript_4_5_Confidence_0.286_Length_2081     | 611.1 | 478 |
| EOG093705KN | Complete   | SampleTS1_Locus_4695_Transcript_2_2_Confidence_0.000_Length_1914   | 459   | 394 |
| EOG093705U4 | Complete   | Sample3_Locus_2613_Transcript_4_6_Confidence_0.333_Length_970      | 172.5 | 190 |
| EOG093705VV | Complete   | SampleTS2_Locus_9621_Transcript_1_1_Confidence_0.000_Length_1253   | 421.8 | 332 |
| EOG093705YA | Fragmented | Sample3_Locus_11212_Transcript_2_4_Confidence_0.500_Length_1034    | 332.1 | 272 |
| EOG093705YE | Fragmented | SampleTS1_Locus_20485_Transcript_2_6_Confidence_0.143_Length_517   | 32.6  | 63  |
| EOG093705Z6 | Complete   | SampleTS2_Locus_13865_Transcript_1_2_Confidence_0.333_Length_1158  | 638.7 | 329 |
| EOG0937060I | Duplicated | Sample6_Locus_12501_Transcript_1_2_Confidence_0.333_Length_2191    | 493   | 587 |
| EOG0937060I | Duplicated | SampleTS1_Locus_8184_Transcript_3_5_Confidence_0.400_Length_3710   | 562.4 | 721 |
| EOG0937066G | Complete   | Sample3_Locus_4849_Transcript_2_3_Confidence_0.333_Length_1992     | 628.7 | 408 |
| EOG0937068H | Complete   | Sample3_Locus_10257_Transcript_10_12_Confidence_0.455_Length_6913  | 161.8 | 439 |
| EOG093706PM | Complete   | Sample3_Locus_11553_Transcript_2_6_Confidence_0.167_Length_2250    | 335.7 | 328 |
| EOG093706RN | Fragmented | Sample3_Locus_10779_Transcript_4_5_Confidence_0.143_Length_1310    | 210.6 | 337 |
| EOG093706X0 | Complete   | SampleTS3_Locus_20404_Transcript_5_8_Confidence_0.667_Length_1756  | 251.7 | 296 |
| EOG09370762 | Complete   | Sample1_Locus_2510_Transcript_3_5_Confidence_0.667_Length_1885     | 797.5 | 487 |
| EOG093707B7 | Fragmented | SampleTS2_Locus_20902_Transcript_1_1_Confidence_0.000_Length_474   | 99.2  | 101 |
| EOG093707HK | Fragmented | Sample1_Locus_26365_Transcript_2_3_Confidence_0.333_Length_947     | 280.7 | 224 |



|             |            |                                                                    |       |     |
|-------------|------------|--------------------------------------------------------------------|-------|-----|
| EOG093707LO | Complete   | Sample6_Locus_12744_Transcript_3_4_Confidence_0.200_Length_2047    | 304.3 | 402 |
| EOG093707RF | Complete   | Sample6_Locus_2442_Transcript_4_16_Confidence_0.038_Length_1846    | 281   | 331 |
| EOG093707VN | Fragmented | Sample1_Locus_20248_Transcript_1_1_Confidence_0.000_Length_738     | 278.5 | 182 |
| EOG093707VQ | Duplicated | Sample6_Locus_5293_Transcript_2_14_Confidence_0.074_Length_2711    | 280   | 522 |
| EOG093707VQ | Duplicated | SampleTS1_Locus_8872_Transcript_7_7_Confidence_0.250_Length_2752   | 321   | 558 |
| EOG0937084T | Complete   | SampleTS1_Locus_15589_Transcript_3_4_Confidence_0.286_Length_1029  | 204.3 | 255 |
| EOG0937085E | Complete   | SampleTS1_Locus_1272_Transcript_7_12_Confidence_0.250_Length_1964  | 450.4 | 414 |
| EOG093708IM | Fragmented | Sample6_Locus_19850_Transcript_2_5_Confidence_0.375_Length_1242    | 303.6 | 223 |
| EOG093708OP | Complete   | Sample1_Locus_9565_Transcript_1_1_Confidence_0.000_Length_1596     | 604.9 | 369 |
| EOG093708TP | Complete   | Sample6_Locus_24894_Transcript_2_4_Confidence_0.750_Length_1312    | 217.4 | 237 |
| EOG0937091Y | Complete   | SampleTS3_Locus_3183_Transcript_1_2_Confidence_0.333_Length_2485   | 556.3 | 520 |
| EOG0937092T | Complete   | SampleTS3_Locus_5343_Transcript_3_5_Confidence_0.286_Length_2471   | 227.7 | 338 |
| EOG0937092W | Complete   | Sample6_Locus_6313_Transcript_3_3_Confidence_0.000_Length_2171     | 334.5 | 423 |
| EOG093709BZ | Complete   | SampleTS1_Locus_1827_Transcript_15_16_Confidence_0.043_Length_2672 | 596.9 | 437 |
| EOG093709HP | Complete   | SampleTS3_Locus_6625_Transcript_3_3_Confidence_0.000_Length_1806   | 369.8 | 366 |
| EOG093709JG | Complete   | Sample1_Locus_15708_Transcript_1_9_Confidence_0.055_Length_1007    | 281.4 | 246 |
| EOG09370A22 | Complete   | Sample1_Locus_15645_Transcript_2_4_Confidence_0.333_Length_1001    | 404.3 | 255 |
| EOG09370ADO | Complete   | Sample6_Locus_891_Transcript_1_8_Confidence_0.375_Length_1651      | 603.2 | 367 |
| EOG09370AI8 | Complete   | Sample1_Locus_7596_Transcript_1_1_Confidence_0.000_Length_1647     | 228.6 | 248 |
| EOG09370AJP | Complete   | Sample1_Locus_3414_Transcript_3_5_Confidence_0.600_Length_1809     | 545.7 | 398 |
| EOG09370AL3 | Missing    |                                                                    |       |     |
| EOG09370ARO | Complete   | SampleTS2_Locus_1325_Transcript_1_7_Confidence_0.667_Length_1724   | 316.8 | 339 |
| EOG09370AS9 | Complete   | Sample6_Locus_9177_Transcript_2_3_Confidence_0.333_Length_793      | 182.5 | 199 |
| EOG09370AV1 | Complete   | Sample1_Locus_3265_Transcript_2_2_Confidence_0.000_Length_1716     | 415.8 | 362 |
| EOG09370AWB | Complete   | Sample6_Locus_3336_Transcript_4_5_Confidence_0.400_Length_1554     | 392.7 | 338 |
| EOG09370B1L | Complete   | SampleTS3_Locus_3272_Transcript_6_6_Confidence_0.000_Length_1533   | 324.2 | 351 |
| EOG09370B65 | Complete   | SampleTS1_Locus_14363_Transcript_1_2_Confidence_0.667_Length_886   | 96.5  | 145 |
| EOG09370B7D | Complete   | SampleTS3_Locus_6008_Transcript_4_5_Confidence_0.200_Length_1527   | 235.5 | 213 |

|             |            |                                                                    |       |     |
|-------------|------------|--------------------------------------------------------------------|-------|-----|
| EOG09370BBR | Complete   | Sample1_Locus_19788_Transcript_1_1_Confidence_0.333_Length_1516    | 641.6 | 340 |
| EOG09370BGO | Complete   | Sample6_Locus_20707_Transcript_2_3_Confidence_0.333_Length_881     | 137   | 165 |
| EOG09370BJE | Complete   | Sample1_Locus_4823_Transcript_3_6_Confidence_0.364_Length_1415     | 363.8 | 250 |
| EOG09370BK5 | Complete   | Sample1_Locus_11386_Transcript_3_6_Confidence_0.667_Length_2134    | 173.3 | 361 |
| EOG09370BQO | Complete   | Sample6_Locus_13384_Transcript_2_4_Confidence_0.400_Length_1647    | 191.3 | 256 |
| EOG09370BYX | Complete   | Sample3_Locus_12500_Transcript_5_16_Confidence_0.086_Length_1337   | 236.4 | 264 |
| EOG09370C5A | Complete   | Sample1_Locus_5040_Transcript_6_59_Confidence_0.077_Length_2422    | 266.5 | 439 |
| EOG09370CAN | Missing    |                                                                    |       |     |
| EOG09370CAV | Complete   | Sample6_Locus_12402_Transcript_6_6_Confidence_0.125_Length_3559    | 508.1 | 526 |
| EOG09370CF1 | Complete   | SampleTS2_Locus_16414_Transcript_2_4_Confidence_0.750_Length_1911  | 90.6  | 177 |
| EOG09370CIV | Complete   | SampleTS1_Locus_11785_Transcript_4_5_Confidence_0.400_Length_1437  | 220.9 | 204 |
| EOG09370CK6 | Missing    |                                                                    |       |     |
| EOG09370CKL | Complete   | SampleTS1_Locus_23304_Transcript_2_3_Confidence_0.333_Length_2324  | 187.7 | 226 |
| EOG09370CRF | Complete   | Sample1_Locus_4733_Transcript_1_5_Confidence_0.286_Length_1406     | 506.4 | 372 |
| EOG09370CTU | Complete   | SampleTS1_Locus_5002_Transcript_1_4_Confidence_0.400_Length_1662   | 344.4 | 363 |
| EOG09370CZ0 | Complete   | Sample1_Locus_10000_Transcript_3_4_Confidence_0.200_Length_1443    | 278.3 | 241 |
| EOG09370CZT | Complete   | Sample6_Locus_8448_Transcript_1_3_Confidence_0.667_Length_1466     | 126   | 182 |
| EOG09370D13 | Complete   | Sample6_Locus_6913_Transcript_8_12_Confidence_0.538_Length_2852    | 347   | 424 |
| EOG09370DO5 | Complete   | Sample1_Locus_8822_Transcript_1_5_Confidence_0.024_Length_1715     | 288.1 | 312 |
| EOG09370DP4 | Fragmented | Sample6_Locus_18310_Transcript_1_7_Confidence_0.111_Length_753     | 120   | 158 |
| EOG09370DS4 | Complete   | SampleTS1_Locus_6708_Transcript_3_10_Confidence_0.579_Length_1242  | 96.5  | 125 |
| EOG09370DTG | Complete   | Sample1_Locus_6930_Transcript_2_4_Confidence_0.333_Length_1535     | 119.9 | 334 |
| EOG09370DV4 | Complete   | SampleTS1_Locus_3854_Transcript_2_3_Confidence_0.333_Length_1402   | 349.9 | 290 |
| EOG09370DX4 | Complete   | SampleTS2_Locus_12297_Transcript_1_1_Confidence_0.000_Length_1037  | 223.1 | 182 |
| EOG09370DXT | Complete   | SampleTS1_Locus_1053_Transcript_18_22_Confidence_0.463_Length_2338 | 86.3  | 157 |
| EOG09370DYK | Fragmented | Sample3_Locus_7272_Transcript_4_4_Confidence_0.190_Length_655      | 49.3  | 55  |
| EOG09370E0Y | Complete   | Sample3_Locus_7465_Transcript_6_8_Confidence_0.455_Length_2812     | 475.5 | 330 |
| EOG09370E36 | Complete   | Sample3_Locus_1751_Transcript_3_3_Confidence_0.000_Length_819      | 107.2 | 154 |
| EOG09370E4U | Complete   | SampleTS1_Locus_9264_Transcript_1_1_Confidence_0.000_Length_1433   | 324.6 | 240 |

|             |            |                                                                   |       |     |
|-------------|------------|-------------------------------------------------------------------|-------|-----|
| EOG09370E4W | Complete   | Sample1_Locus_9153_Transcript_1_4_Confidence_0.750_Length_1500    | 317.1 | 274 |
| EOG09370E8S | Complete   | Sample3_Locus_27250_Transcript_1_1_Confidence_0.000_Length_1764   | 283.9 | 299 |
| EOG09370EHZ | Fragmented | SampleTS3_Locus_6897_Transcript_2_2_Confidence_0.333_Length_1282  | 206.9 | 233 |
| EOG09370EL3 | Complete   | SampleTS1_Locus_14130_Transcript_1_1_Confidence_0.000_Length_1456 | 292.3 | 289 |
| EOG09370ERS | Complete   | Sample6_Locus_988_Transcript_4_5_Confidence_0.400_Length_993      | 202.6 | 202 |
| EOG09370F1Q | Complete   | SampleTS1_Locus_6795_Transcript_1_1_Confidence_0.000_Length_1133  | 96.7  | 119 |
| EOG09370F3T | Complete   | SampleTS1_Locus_7773_Transcript_2_2_Confidence_0.000_Length_881   | 57.8  | 176 |
| EOG09370F47 | Complete   | Sample3_Locus_6459_Transcript_3_4_Confidence_0.200_Length_1533    | 441.4 | 268 |
| EOG09370FKI | Complete   | Sample1_Locus_10278_Transcript_1_3_Confidence_0.667_Length_1067   | 103.8 | 253 |
| EOG09370FLD | Complete   | SampleTS3_Locus_19797_Transcript_3_3_Confidence_0.000_Length_1329 | 395.7 | 316 |
| EOG09370FN1 | Complete   | SampleTS3_Locus_1849_Transcript_3_5_Confidence_0.600_Length_1324  | 429.1 | 282 |
| EOG09370FSS | Complete   | Sample6_Locus_6392_Transcript_5_5_Confidence_0.000_Length_1715    | 306.6 | 354 |
| EOG09370FVX | Complete   | Sample1_Locus_9133_Transcript_2_8_Confidence_0.667_Length_1752    | 273.6 | 298 |
| EOG09370FWQ | Complete   | SampleTS3_Locus_13170_Transcript_1_1_Confidence_0.000_Length_1469 | 417.2 | 311 |
| EOG09370FXE | Complete   | Sample1_Locus_67_Transcript_9_10_Confidence_0.125_Length_1441     | 94.4  | 138 |
| EOG09370GC2 | Fragmented | Sample6_Locus_27805_Transcript_5_5_Confidence_0.000_Length_666    | 24.5  | 31  |
| EOG09370GEO | Fragmented | Sample1_Locus_1116_Transcript_18_21_Confidence_0.181_Length_1365  | 115.1 | 138 |
| EOG09370GHM | Complete   | Sample1_Locus_10825_Transcript_2_3_Confidence_0.333_Length_2164   | 210.7 | 211 |
| EOG09370GHP | Fragmented | Sample1_Locus_18114_Transcript_1_3_Confidence_0.333_Length_934    | 26.5  | 58  |
| EOG09370GIK | Complete   | Sample1_Locus_2710_Transcript_3_6_Confidence_0.429_Length_964     | 345.4 | 214 |
| EOG09370GJ7 | Complete   | Sample3_Locus_13814_Transcript_2_3_Confidence_0.333_Length_1262   | 224.6 | 245 |
| EOG09370GK0 | Complete   | SampleTS3_Locus_10370_Transcript_5_5_Confidence_0.000_Length_1459 | 198.1 | 245 |
| EOG09370H3E | Complete   | SampleTS1_Locus_4847_Transcript_3_5_Confidence_0.600_Length_1357  | 360   | 261 |
| EOG09370H68 | Complete   | Sample1_Locus_12224_Transcript_1_1_Confidence_0.000_Length_1004   | 130.5 | 182 |
| EOG09370HBN | Fragmented | Sample3_Locus_18667_Transcript_1_1_Confidence_0.000_Length_963    | 123.8 | 157 |
| EOG09370HD7 | Complete   | Sample1_Locus_10854_Transcript_1_1_Confidence_0.000_Length_1327   | 330.6 | 264 |
| EOG09370HKV | Complete   | SampleTS2_Locus_504_Transcript_10_14_Confidence_0.368_Length_1174 | 115.6 | 305 |
| EOG09370HVI | Missing    |                                                                   |       |     |

|             |            |                                                                   |       |     |
|-------------|------------|-------------------------------------------------------------------|-------|-----|
| EOG09370I3J | Complete   | SampleTS2_Locus_4841_Transcript_5_10_Confidence_0.692_Length_1164 | 218.2 | 221 |
| EOG09370I7R | Complete   | Sample6_Locus_10203_Transcript_4_6_Confidence_0.333_Length_998    | 310.6 | 192 |
| EOG09370IF5 | Complete   | Sample1_Locus_17656_Transcript_1_3_Confidence_0.333_Length_1400   | 324.2 | 284 |
| EOG09370IH5 | Complete   | SampleTS1_Locus_4985_Transcript_4_22_Confidence_0.274_Length_1006 | 241.6 | 215 |
| EOG09370IMU | Complete   | Sample1_Locus_4533_Transcript_5_16_Confidence_0.090_Length_1635   | 164.2 | 193 |
| EOG09370INZ | Fragmented | Sample6_Locus_19319_Transcript_1_1_Confidence_0.000_Length_447    | 46.9  | 70  |
| EOG09370IUA | Complete   | Sample1_Locus_24058_Transcript_2_3_Confidence_0.333_Length_1515   | 310.7 | 208 |
| EOG09370J9L | Fragmented | SampleTS1_Locus_7629_Transcript_5_5_Confidence_0.000_Length_788   | 95.1  | 161 |
| EOG09370JIK | Complete   | Sample6_Locus_2590_Transcript_6_9_Confidence_0.500_Length_1456    | 219.2 | 196 |
| EOG09370JW6 | Missing    |                                                                   |       |     |
| EOG09370JZ3 | Complete   | Sample1_Locus_266_Transcript_9_9_Confidence_0.000_Length_1624     | 193.4 | 177 |
| EOG09370K15 | Complete   | SampleTS3_Locus_24254_Transcript_1_1_Confidence_0.000_Length_902  | 70.9  | 123 |
| EOG09370K1R | Fragmented | SampleTS2_Locus_3665_Transcript_1_1_Confidence_0.000_Length_1325  | 99.3  | 141 |
| EOG09370KD4 | Complete   | Sample3_Locus_5266_Transcript_2_7_Confidence_0.300_Length_1183    | 384.9 | 234 |
| EOG09370KGV | Complete   | Sample6_Locus_15085_Transcript_1_1_Confidence_0.000_Length_1486   | 110.9 | 89  |
| EOG09370KJ3 | Complete   | Sample1_Locus_8015_Transcript_1_2_Confidence_0.667_Length_962     | 222.4 | 177 |
| EOG09370KM9 | Complete   | Sample3_Locus_10654_Transcript_5_7_Confidence_0.647_Length_1935   | 121.1 | 254 |
| EOG09370KOV | Complete   | Sample1_Locus_10314_Transcript_2_12_Confidence_0.069_Length_1259  | 156.3 | 179 |
| EOG09370KWF | Complete   | SampleTS2_Locus_8315_Transcript_1_1_Confidence_0.000_Length_1215  | 128.8 | 180 |
| EOG09370KYZ | Complete   | Sample6_Locus_19645_Transcript_2_4_Confidence_0.333_Length_1748   | 293.6 | 199 |
| EOG09370L23 | Complete   | Sample1_Locus_7251_Transcript_6_6_Confidence_0.143_Length_1069    | 296.1 | 217 |
| EOG09370L77 | Missing    |                                                                   |       |     |
| EOG09370LFI | Complete   | SampleTS2_Locus_5458_Transcript_8_9_Confidence_0.500_Length_1344  | 356.6 | 234 |
| EOG09370LGH | Complete   | Sample1_Locus_8_Transcript_6_11_Confidence_0.612_Length_1512      | 256.8 | 283 |
| EOG09370LMP | Complete   | Sample6_Locus_16309_Transcript_1_2_Confidence_0.750_Length_1716   | 288.4 | 301 |
| EOG09370LQ2 | Complete   | Sample6_Locus_30085_Transcript_2_3_Confidence_0.500_Length_777    | 96.4  | 177 |
| EOG09370LYY | Complete   | SampleTS1_Locus_24122_Transcript_3_5_Confidence_0.500_Length_1074 | 112.2 | 278 |
| EOG09370M9E | Complete   | Sample3_Locus_27863_Transcript_1_1_Confidence_0.000_Length_907    | 290.1 | 204 |
| EOG09370MAO | Complete   | Sample3_Locus_23245_Transcript_2_3_Confidence_0.333_Length_1042   | 304.9 | 241 |

|             |            |                                                                    |       |     |
|-------------|------------|--------------------------------------------------------------------|-------|-----|
| EOG09370MDU | Complete   | SampleTS3_Locus_23743_Transcript_2_3_Confidence_0.500_Length_1152  | 209.4 | 183 |
| EOG09370MGF | Complete   | SampleTS2_Locus_2228_Transcript_13_14_Confidence_0.486_Length_2575 | 173.9 | 263 |
| EOG09370MHI | Complete   | Sample1_Locus_28199_Transcript_1_2_Confidence_0.750_Length_954     | 166.2 | 183 |
| EOG09370MMK | Complete   | SampleTS2_Locus_13332_Transcript_5_6_Confidence_0.222_Length_1565  | 350.8 | 233 |
| EOG09370MQ0 | Complete   | SampleTS2_Locus_6327_Transcript_8_25_Confidence_0.174_Length_1156  | 252   | 205 |
| EOG09370MZ4 | Complete   | Sample1_Locus_26978_Transcript_3_4_Confidence_0.400_Length_962     | 382.4 | 226 |
| EOG09370N7W | Complete   | Sample1_Locus_12672_Transcript_1_1_Confidence_0.000_Length_1866    | 398.5 | 267 |
| EOG09370NBT | Complete   | SampleTS2_Locus_9964_Transcript_2_4_Confidence_0.600_Length_1249   | 237.8 | 242 |
| EOG09370NBW | Complete   | SampleTS3_Locus_9895_Transcript_2_4_Confidence_0.400_Length_1636   | 122.1 | 153 |
| EOG09370NHX | Fragmented | Sample3_Locus_11202_Transcript_3_3_Confidence_0.000_Length_613     | 56.8  | 96  |
| EOG09370NIG | Complete   | Sample1_Locus_11647_Transcript_4_6_Confidence_0.647_Length_3781    | 151.1 | 167 |
| EOG09370O06 | Complete   | Sample1_Locus_8335_Transcript_5_6_Confidence_0.081_Length_1180     | 182.5 | 194 |
| EOG09370O51 | Complete   | Sample1_Locus_7506_Transcript_1_4_Confidence_0.333_Length_951      | 254.5 | 196 |
| EOG09370OFR | Complete   | Sample3_Locus_19095_Transcript_1_2_Confidence_0.333_Length_1720    | 294.5 | 300 |
| EOG09370OGU | Complete   | Sample6_Locus_13202_Transcript_1_1_Confidence_0.000_Length_925     | 157.6 | 186 |
| EOG09370OGW | Complete   | Sample1_Locus_4270_Transcript_3_7_Confidence_0.333_Length_1214     | 125.2 | 144 |
| EOG09370OHP | Complete   | Sample6_Locus_15392_Transcript_2_4_Confidence_0.333_Length_1277    | 234.5 | 205 |
| EOG09370OLY | Complete   | SampleTS2_Locus_10705_Transcript_2_4_Confidence_0.400_Length_1376  | 163.7 | 149 |
| EOG09370O03 | Complete   | Sample1_Locus_11638_Transcript_3_4_Confidence_0.500_Length_1334    | 211   | 196 |
| EOG09370O55 | Complete   | SampleTS1_Locus_24318_Transcript_1_1_Confidence_0.000_Length_903   | 92.6  | 154 |
| EOG09370OUS | Duplicated | Sample6_Locus_13813_Transcript_1_1_Confidence_0.000_Length_1092    | 229.3 | 168 |
| EOG09370OUS | Duplicated | SampleTS1_Locus_6359_Transcript_7_7_Confidence_0.294_Length_1274   | 198.5 | 173 |
| EOG09370P2W | Duplicated | Sample6_Locus_10877_Transcript_1_3_Confidence_0.667_Length_556     | 82.1  | 94  |
| EOG09370P2W | Duplicated | SampleTS2_Locus_1141_Transcript_1_3_Confidence_0.667_Length_647    | 80.5  | 94  |
| EOG09370P5Q | Fragmented | Sample6_Locus_12518_Transcript_3_3_Confidence_0.200_Length_959     | 115.9 | 139 |
| EOG09370P7I | Complete   | Sample6_Locus_23783_Transcript_3_3_Confidence_0.000_Length_864     | 105   | 181 |
| EOG09370P9T | Fragmented | Sample3_Locus_17766_Transcript_1_2_Confidence_0.333_Length_694     | 194.1 | 157 |
| EOG09370PBD | Fragmented | SampleTS3_Locus_22996_Transcript_4_6_Confidence_0.400_Length_583   | 264.8 | 157 |

|             |            |                                                                   |       |     |
|-------------|------------|-------------------------------------------------------------------|-------|-----|
| EOG09370PLC | Complete   | Sample6_Locus_1702_Transcript_13_18_Confidence_0.348_Length_1386  | 249.5 | 223 |
| EOG09370PN3 | Missing    |                                                                   |       |     |
| EOG09370PYJ | Complete   | SampleTS3_Locus_11332_Transcript_1_1_Confidence_0.000_Length_760  | 282   | 224 |
| EOG09370QBK | Complete   | SampleTS3_Locus_6723_Transcript_6_8_Confidence_0.286_Length_1079  | 131   | 138 |
| EOG09370QBR | Fragmented | SampleTS1_Locus_5209_Transcript_1_1_Confidence_0.750_Length_741   | 145.5 | 142 |
| EOG09370QCX | Missing    |                                                                   |       |     |
| EOG09370QFD | Complete   | SampleTS2_Locus_6656_Transcript_5_10_Confidence_0.565_Length_1070 | 79.4  | 154 |
| EOG09370QI4 | Complete   | SampleTS1_Locus_3459_Transcript_2_4_Confidence_0.714_Length_1228  | 158.1 | 189 |
| EOG09370QJ1 | Complete   | Sample1_Locus_29286_Transcript_1_3_Confidence_0.333_Length_1031   | 257.1 | 176 |
| EOG09370QKS | Missing    |                                                                   |       |     |
| EOG09370QMM | Complete   | Sample6_Locus_536_Transcript_5_7_Confidence_0.071_Length_1972     | 177   | 210 |
| EOG09370QT3 | Complete   | SampleTS2_Locus_13041_Transcript_7_8_Confidence_0.100_Length_1217 | 42.4  | 80  |
| EOG09370QVI | Complete   | SampleTS2_Locus_15990_Transcript_2_4_Confidence_0.750_Length_1485 | 208.6 | 220 |
| EOG09370R3M | Complete   | SampleTS2_Locus_8132_Transcript_2_2_Confidence_0.333_Length_829   | 268.7 | 183 |
| EOG09370R67 | Complete   | Sample3_Locus_10859_Transcript_1_1_Confidence_0.000_Length_749    | 130.2 | 107 |
| EOG09370RCD | Complete   | Sample1_Locus_14437_Transcript_6_7_Confidence_0.333_Length_2011   | 292.5 | 408 |
| EOG09370RCQ | Complete   | SampleTS2_Locus_4969_Transcript_19_24_Confidence_0.235_Length_980 | 270.6 | 187 |
| EOG09370RCS | Complete   | Sample1_Locus_13869_Transcript_1_13_Confidence_0.059_Length_1475  | 195.8 | 170 |
| EOG09370RIT | Complete   | Sample1_Locus_5002_Transcript_2_3_Confidence_0.333_Length_1136    | 266.7 | 134 |
| EOG09370RJN | Complete   | Sample3_Locus_13187_Transcript_7_8_Confidence_0.545_Length_1733   | 302.6 | 271 |
| EOG09370RRJ | Fragmented | SampleTS1_Locus_6265_Transcript_1_4_Confidence_0.200_Length_1674  | 164.2 | 94  |
| EOG09370S0F | Fragmented | Sample6_Locus_24708_Transcript_6_11_Confidence_0.068_Length_327   | 81.2  | 65  |
| EOG09370S1Z | Complete   | Sample6_Locus_15436_Transcript_1_3_Confidence_0.333_Length_1435   | 88.8  | 78  |
| EOG09370S3E | Complete   | Sample1_Locus_20404_Transcript_1_2_Confidence_0.333_Length_1142   | 112.9 | 156 |
| EOG09370S4T | Complete   | Sample3_Locus_10702_Transcript_8_9_Confidence_0.222_Length_709    | 180.4 | 131 |
| EOG09370SC9 | Complete   | Sample1_Locus_20787_Transcript_1_1_Confidence_0.000_Length_670    | 92.9  | 122 |
| EOG09370SO4 | Complete   | Sample6_Locus_25078_Transcript_2_3_Confidence_0.667_Length_1039   | 49.2  | 79  |
| EOG09370SON | Fragmented | SampleTS2_Locus_22510_Transcript_4_4_Confidence_0.000_Length_765  | 132.6 | 116 |
| EOG09370SPQ | Missing    |                                                                   |       |     |
| EOG09370SV2 | Complete   | SampleTS1_Locus_22960_Transcript_4_5_Confidence_0.545_Length_1144 | 150.1 | 136 |

|             |            |                                                                   |       |     |
|-------------|------------|-------------------------------------------------------------------|-------|-----|
| EOG09370SYK | Complete   | Sample6_Locus_10778_Transcript_11_17_Confidence_0.136_Length_1868 | 380.5 | 389 |
| EOG09370T6W | Complete   | Sample3_Locus_7656_Transcript_3_3_Confidence_0.000_Length_792     | 168.1 | 166 |
| EOG09370T9R | Complete   | Sample1_Locus_3476_Transcript_2_10_Confidence_0.077_Length_973    | 213.5 | 157 |
| EOG09370TBD | Complete   | Sample3_Locus_6085_Transcript_14_15_Confidence_0.065_Length_696   | 210.6 | 136 |
| EOG09370TBG | Complete   | Sample1_Locus_8940_Transcript_3_4_Confidence_0.400_Length_1113    | 125.2 | 154 |
| EOG09370TCX | Complete   | Sample1_Locus_25419_Transcript_1_1_Confidence_0.000_Length_509    | 185.9 | 136 |
| EOG09370TFO | Duplicated | Sample1_Locus_25057_Transcript_2_6_Confidence_0.727_Length_1459   | 90.5  | 234 |
| EOG09370TFO | Duplicated | Sample6_Locus_7235_Transcript_2_4_Confidence_0.500_Length_949     | 82    | 190 |
| EOG09370TG2 | Complete   | SampleTS3_Locus_5573_Transcript_4_5_Confidence_0.333_Length_940   | 180.6 | 149 |
| EOG09370TG6 | Complete   | SampleTS1_Locus_9604_Transcript_1_1_Confidence_0.667_Length_1348  | 150.7 | 133 |
| EOG09370TH4 | Complete   | Sample6_Locus_661_Transcript_11_15_Confidence_0.057_Length_877    | 142.6 | 119 |
| EOG09370TP2 | Complete   | SampleTS1_Locus_7011_Transcript_1_1_Confidence_0.000_Length_1056  | 202.5 | 222 |
| EOG09370TS7 | Complete   | SampleTS2_Locus_12167_Transcript_1_1_Confidence_0.000_Length_1077 | 119   | 131 |
| EOG09370TTI | Complete   | SampleTS2_Locus_14345_Transcript_1_1_Confidence_0.000_Length_568  | 79.4  | 83  |
| EOG09370U0A | Complete   | Sample1_Locus_2474_Transcript_1_1_Confidence_0.000_Length_652     | 195.3 | 160 |
| EOG09370U71 | Complete   | Sample1_Locus_3449_Transcript_9_11_Confidence_0.667_Length_1316   | 198.1 | 208 |
| EOG09370U9P | Complete   | Sample3_Locus_9475_Transcript_2_2_Confidence_0.000_Length_1080    | 97.7  | 164 |
| EOG09370UEC | Complete   | SampleTS1_Locus_24176_Transcript_5_5_Confidence_0.200_Length_1263 | 219.7 | 161 |
| EOG09370UG9 | Duplicated | Sample3_Locus_9971_Transcript_6_8_Confidence_0.385_Length_1981    | 138.2 | 145 |
| EOG09370UG9 | Duplicated | Sample3_Locus_9971_Transcript_8_8_Confidence_0.077_Length_1449    | 139.2 | 145 |
| EOG09370UG9 | Duplicated | SampleTS2_Locus_11308_Transcript_6_6_Confidence_0.000_Length_879  | 140.5 | 146 |
| EOG09370UID | Complete   | Sample3_Locus_26583_Transcript_4_6_Confidence_0.556_Length_1236   | 229.4 | 130 |
| EOG09370UO4 | Complete   | Sample3_Locus_6816_Transcript_2_4_Confidence_0.750_Length_1043    | 205.1 | 165 |
| EOG09370UR1 | Complete   | Sample1_Locus_13147_Transcript_1_2_Confidence_0.333_Length_892    | 141.9 | 137 |
| EOG09370UR3 | Complete   | Sample1_Locus_15932_Transcript_1_1_Confidence_0.000_Length_833    | 229.6 | 159 |
| EOG09370USH | Complete   | Sample3_Locus_2005_Transcript_1_1_Confidence_0.000_Length_978     | 127.4 | 146 |
| EOG09370USJ | Complete   | Sample6_Locus_8749_Transcript_2_2_Confidence_0.500_Length_914     | 235.6 | 183 |
| EOG09370UV4 | Fragmented | SampleTS3_Locus_23306_Transcript_1_3_Confidence_0.750_Length_600  | 141.7 | 122 |

|             |            |                                                                   |       |     |
|-------------|------------|-------------------------------------------------------------------|-------|-----|
| EOG09370V9R | Complete   | SampleTS1_Locus_18781_Transcript_2_4_Confidence_0.400_Length_1162 | 66.7  | 116 |
| EOG09370VFL | Complete   | SampleTS3_Locus_4545_Transcript_3_4_Confidence_0.200_Length_1244  | 214.5 | 247 |
| EOG09370VLM | Complete   | SampleTS1_Locus_8576_Transcript_2_2_Confidence_0.000_Length_656   | 103.9 | 112 |
| EOG09370VTP | Fragmented | Sample6_Locus_5591_Transcript_3_6_Confidence_0.000_Length_305     | 59.8  | 75  |
| EOG09370VUX | Complete   | Sample6_Locus_19866_Transcript_3_3_Confidence_0.000_Length_873    | 147.3 | 142 |
| EOG09370W44 | Complete   | SampleTS2_Locus_1415_Transcript_4_7_Confidence_0.571_Length_968   | 151.4 | 125 |
| EOG09370W6N | Complete   | Sample3_Locus_2360_Transcript_1_4_Confidence_0.400_Length_677     | 139.4 | 138 |
| EOG09370W86 | Complete   | SampleTS1_Locus_7077_Transcript_1_4_Confidence_0.400_Length_1107  | 206.2 | 160 |
| EOG09370WT1 | Complete   | SampleTS3_Locus_7825_Transcript_2_2_Confidence_0.000_Length_708   | 146.9 | 123 |
| EOG09370WWI | Complete   | Sample3_Locus_25812_Transcript_3_5_Confidence_0.125_Length_983    | 147.8 | 157 |
| EOG09370WYG | Missing    |                                                                   |       |     |
| EOG09370WZX | Complete   | SampleTS2_Locus_11551_Transcript_1_1_Confidence_0.000_Length_999  | 86    | 149 |
| EOG09370X1T | Complete   | Sample6_Locus_19376_Transcript_2_3_Confidence_0.750_Length_511    | 107.4 | 96  |
| EOG09370XFG | Complete   | SampleTS1_Locus_28942_Transcript_1_2_Confidence_0.333_Length_1054 | 59.7  | 107 |
| EOG09370XFJ | Complete   | Sample3_Locus_1220_Transcript_6_8_Confidence_0.429_Length_1154    | 364.8 | 284 |
| EOG09370XO6 | Complete   | Sample1_Locus_12634_Transcript_5_6_Confidence_0.167_Length_799    | 168.1 | 129 |
| EOG09370Y63 | Missing    |                                                                   |       |     |
| EOG09370YC4 | Complete   | SampleTS3_Locus_9956_Transcript_3_3_Confidence_0.250_Length_794   | 111.7 | 159 |
| EOG09370YCN | Complete   | Sample1_Locus_9670_Transcript_4_4_Confidence_0.000_Length_614     | 109.2 | 115 |
| EOG09370YSI | Complete   | Sample3_Locus_9561_Transcript_4_6_Confidence_0.061_Length_1614    | 187.9 | 234 |
| EOG09370ZI7 | Complete   | SampleTS1_Locus_20615_Transcript_2_2_Confidence_0.000_Length_447  | 91.7  | 85  |
| EOG09370ZOK | Complete   | Sample6_Locus_9715_Transcript_7_10_Confidence_0.312_Length_2211   | 111.7 | 289 |
| EOG0937106D | Complete   | Sample6_Locus_8723_Transcript_4_5_Confidence_0.200_Length_746     | 151.9 | 138 |
| EOG0937106Y | Complete   | Sample3_Locus_24653_Transcript_1_2_Confidence_0.500_Length_644    | 147.6 | 155 |
| EOG09371088 | Complete   | Sample3_Locus_10333_Transcript_2_3_Confidence_0.750_Length_926    | 175.2 | 140 |
| EOG093710A7 | Complete   | SampleTS3_Locus_8191_Transcript_4_6_Confidence_0.429_Length_770   | 63.7  | 84  |
| EOG093710JH | Complete   | Sample1_Locus_24940_Transcript_2_3_Confidence_0.051_Length_716    | 58.9  | 72  |
| EOG093710SY | Complete   | Sample1_Locus_5469_Transcript_3_3_Confidence_0.000_Length_653     | 164.9 | 103 |
| EOG093710T1 | Complete   | SampleTS1_Locus_6585_Transcript_2_9_Confidence_0.154_Length_824   | 64.7  | 85  |



|              |            |                                                                  |       |     |
|--------------|------------|------------------------------------------------------------------|-------|-----|
| EOG0937112Y  | Complete   | Sample6_Locus_13893_Transcript_3_3_Confidence_0.167_Length_1014  | 140.6 | 189 |
| EOG093711E9  | Complete   | Sample1_Locus_3284_Transcript_3_5_Confidence_0.429_Length_669    | 162.8 | 110 |
| EOG0937111LC | Complete   | SampleTS3_Locus_23452_Transcript_2_2_Confidence_0.333_Length_474 | 69.9  | 70  |
| EOG0937111QY | Fragmented | Sample3_Locus_10114_Transcript_3_3_Confidence_0.000_Length_660   | 54    | 54  |
| EOG0937111ZO | Complete   | Sample1_Locus_24571_Transcript_8_9_Confidence_0.300_Length_768   | 214.5 | 170 |
| EOG0937122Q  | Duplicated | Sample3_Locus_1719_Transcript_2_5_Confidence_0.571_Length_545    | 52.9  | 71  |
| EOG0937122Q  | Duplicated | Sample6_Locus_3576_Transcript_6_7_Confidence_0.500_Length_457    | 45.7  | 69  |
| EOG0937128O  | Fragmented | SampleTS3_Locus_23143_Transcript_1_1_Confidence_0.000_Length_593 | 81.5  | 68  |
| EOG0937129K  | Complete   | Sample1_Locus_8283_Transcript_16_27_Confidence_0.476_Length_2456 | 95.8  | 84  |
| EOG093712G8  | Fragmented | SampleTS3_Locus_3197_Transcript_1_1_Confidence_0.000_Length_435  | 93.8  | 91  |
| EOG093712Q6  | Complete   | SampleTS2_Locus_11321_Transcript_4_4_Confidence_0.286_Length_668 | 149.2 | 72  |
| EOG0937133O  | Complete   | Sample6_Locus_7693_Transcript_9_11_Confidence_0.000_Length_836   | 107.6 | 112 |
| EOG0937133J  | Complete   | Sample6_Locus_4538_Transcript_2_2_Confidence_0.000_Length_588    | 187.6 | 111 |
| EOG093713HJ  | Complete   | Sample1_Locus_2642_Transcript_3_7_Confidence_0.500_Length_846    | 91.9  | 84  |
| EOG093713LY  | Complete   | SampleTS1_Locus_30893_Transcript_1_1_Confidence_0.000_Length_566 | 130.1 | 87  |
| EOG09371431  | Complete   | Sample1_Locus_1163_Transcript_2_3_Confidence_0.500_Length_574    | 164.2 | 97  |
| EOG093714JU  | Complete   | SampleTS2_Locus_9976_Transcript_8_9_Confidence_0.636_Length_459  | 77.6  | 82  |
| EOG093714Q2  | Missing    |                                                                  |       |     |
| EOG093715EC  | Complete   | Sample1_Locus_3035_Transcript_1_1_Confidence_0.000_Length_693    | 92.5  | 90  |
| EOG09371675  | Complete   | SampleTS3_Locus_24383_Transcript_1_1_Confidence_0.000_Length_439 | 122.9 | 93  |
| EOG0937167R  | Complete   | Sample6_Locus_613_Transcript_4_5_Confidence_0.400_Length_739     | 122.6 | 103 |
| EOG093716T7  | Complete   | SampleTS2_Locus_7013_Transcript_4_6_Confidence_0.667_Length_1221 | 155.3 | 217 |
| EOG093717LU  | Complete   | SampleTS2_Locus_9380_Transcript_4_5_Confidence_0.429_Length_552  | 95.8  | 51  |
| EOG0937183G  | Missing    |                                                                  |       |     |
| EOG0937186Q  | Complete   | Sample1_Locus_21626_Transcript_3_4_Confidence_0.500_Length_1658  | 108   | 106 |
| EOG093718E9  | Complete   | Sample1_Locus_29387_Transcript_1_1_Confidence_0.000_Length_514   | 109.1 | 77  |
| EOG093718EG  | Missing    |                                                                  |       |     |
| EOG0937192A  | Complete   | SampleTS1_Locus_13686_Transcript_1_4_Confidence_0.167_Length_930 | 110.3 | 132 |
| EOG093719IK  | Complete   | SampleTS1_Locus_23455_Transcript_1_1_Confidence_0.000_Length_893 | 117   | 101 |

|             |          |                                                                 |      |    |
|-------------|----------|-----------------------------------------------------------------|------|----|
| EOG093719M8 | Complete | Sample6_Locus_4514_Transcript_2_6_Confidence_0.400_Length_1026  | 56.5 | 66 |
| EOG09371BIR | Complete | SampleTS2_Locus_4839_Transcript_2_2_Confidence_0.333_Length_642 | 74.2 | 95 |

---



|  |  |                                                                                                                                                                                                                                                                                                                                                                                                                                                                                                                                                                                                                                                                                                                                                                                                                                                                                                                                                                                                                                                                                                                                   |                                                                                                                                                                                                                                                                                                                                                                                                                                                                                                                                                                                                                                                                                                                                                                                                                                                                                                                                                                                                                                                                                                                                                                                                                                                                                                                                                                                                                                                                                                                                                                                                                                                                                                                                                                                                                                                                                                                                                                                                                                                                                                                                                                                                                                                                                                                                                                                                                                                                                                                                                                                                                                                                                                                                                                                                                                                                                                                                                                                                                                                                                                                                                                                                                                                                                                                                                                                                                                                                                                                                                                                                                                                                                                                                                                                                                                                                                                                                                                                                                                                                                                                                                                                                                                                                                                                                                                                                                                                                                                                                                                                                                                                                                                                                                                                                                                                                                                                                                                                                                                           |
|--|--|-----------------------------------------------------------------------------------------------------------------------------------------------------------------------------------------------------------------------------------------------------------------------------------------------------------------------------------------------------------------------------------------------------------------------------------------------------------------------------------------------------------------------------------------------------------------------------------------------------------------------------------------------------------------------------------------------------------------------------------------------------------------------------------------------------------------------------------------------------------------------------------------------------------------------------------------------------------------------------------------------------------------------------------------------------------------------------------------------------------------------------------|-------------------------------------------------------------------------------------------------------------------------------------------------------------------------------------------------------------------------------------------------------------------------------------------------------------------------------------------------------------------------------------------------------------------------------------------------------------------------------------------------------------------------------------------------------------------------------------------------------------------------------------------------------------------------------------------------------------------------------------------------------------------------------------------------------------------------------------------------------------------------------------------------------------------------------------------------------------------------------------------------------------------------------------------------------------------------------------------------------------------------------------------------------------------------------------------------------------------------------------------------------------------------------------------------------------------------------------------------------------------------------------------------------------------------------------------------------------------------------------------------------------------------------------------------------------------------------------------------------------------------------------------------------------------------------------------------------------------------------------------------------------------------------------------------------------------------------------------------------------------------------------------------------------------------------------------------------------------------------------------------------------------------------------------------------------------------------------------------------------------------------------------------------------------------------------------------------------------------------------------------------------------------------------------------------------------------------------------------------------------------------------------------------------------------------------------------------------------------------------------------------------------------------------------------------------------------------------------------------------------------------------------------------------------------------------------------------------------------------------------------------------------------------------------------------------------------------------------------------------------------------------------------------------------------------------------------------------------------------------------------------------------------------------------------------------------------------------------------------------------------------------------------------------------------------------------------------------------------------------------------------------------------------------------------------------------------------------------------------------------------------------------------------------------------------------------------------------------------------------------------------------------------------------------------------------------------------------------------------------------------------------------------------------------------------------------------------------------------------------------------------------------------------------------------------------------------------------------------------------------------------------------------------------------------------------------------------------------------------------------------------------------------------------------------------------------------------------------------------------------------------------------------------------------------------------------------------------------------------------------------------------------------------------------------------------------------------------------------------------------------------------------------------------------------------------------------------------------------------------------------------------------------------------------------------------------------------------------------------------------------------------------------------------------------------------------------------------------------------------------------------------------------------------------------------------------------------------------------------------------------------------------------------------------------------------------------------------------------------------------------------------------------------------------|
|  |  | <p>glycolaldehydet ransferase, ec:1.1.1.6</p> <p>equilase, ec:2.2.1.6</p> <p>synthase, ec:4.1.3.27</p> <p>synthase, ec:2.7.2.4</p> <p>kinase, ec:2.7.1.40</p> <p>kinase, ec:2.7.2.11</p> <p>5kinase, ec:3.5.4.6</p> <p>deaminase, ec:6.3.2.6</p> <p>synthase, ec:1.2.1.41</p> <p>dehydrogenase, ec:2.7.1.2</p> <p>glucokinase (phosphorylatin g), ec:2.7.1.1</p> <p>hexokinase type IV glucokinase, ec:4.2.3.5</p> <p>synthase, ec:4.2.3.4</p> <p>synthase, ec:2.6.1.42</p> <p>transaminase, ec:2.6.1.45</p> <p>transaminase, ec:1.2.1.59</p> <p>dehydrogenase (NAD(P)+) (phosphorylatin g), ec:1.1.1.216</p> <p>dehydrogenase (NADP+), ec:4.1.1.1</p> <p>decarboxylase, ec:4.2.1.51</p> <p>dehydratase, ec:6.2.1.5</p> <p>ligase (ADPforming), ec:6.2.1.4</p> <p>ligase (GDPforming), ec:6.2.1.1</p> <p>ligase, ec:5.1.3.3</p> <p>1epimerase, ec:5.1.3.1</p> <p>3epimerase, ec:2.5.1.21</p> <p>synthase, ec:2.3.1.12</p> <p>acetyltransferas e, ec:3.1.3.11</p> <p>hexose diphosphatase, ec:2.3.1.16</p> <p>Cacyltransferas e, ec:2.5.1.29</p> <p>diphosphate synthase, ec:2.7.7.4</p> <p>adenylyltransfe rase, ec:1.1.1.133</p> | <p>9,</p> <p>SampleTS1_Locus_7761_Transcript_5/10_Confidence_0.105_Length_1358</p> <p>,</p> <p>SampleTS2_Locus_14711_Transcript_4/7_Confidence_0.273_Length_1393</p> <p>,</p> <p>Sample6_Locus_2327_Transcript_47/56_Confidence_0.195_Length_2423,</p> <p>Sample6_Locus_22851_Transcript_2/3_Confidence_0.714_Length_1077,</p> <p>SampleTS1_Locus_2696_Transcript_4/6_Confidence_0.545_Length_1155,</p> <p>Sample3_Locus_23456_Transcript_1/1_Confidence_0.000_Length_1406,</p> <p>SampleTS2_Locus_20780_Transcript_2/3_Confidence_0.600_Length_1460</p> <p>, Sample1_Locus_7394_Transcript_5/5_Confidence_0.000_Length_2434,</p> <p>SampleTS2_Locus_20841_Transcript_1/1_Confidence_0.000_Length_1375</p> <p>, Sample3_Locus_23456_Transcript_1/1_Confidence_0.000_Length_1406,</p> <p>Sample1_Locus_3087_Transcript_2/3_Confidence_0.333_Length_2354,</p> <p>SampleTS2_Locus_20780_Transcript_2/3_Confidence_0.600_Length_1460</p> <p>, Sample6_Locus_5095_Transcript_5/8_Confidence_0.300_Length_1241,</p> <p>Sample6_Locus_5095_Transcript_5/8_Confidence_0.300_Length_1241,</p> <p>SampleTS2_Locus_10844_Transcript_3/4_Confidence_0.200_Length_1482</p> <p>, Sample6_Locus_15905_Transcript_2/2_Confidence_0.000_Length_483,</p> <p>Sample3_Locus_8753_Transcript_3/7_Confidence_0.053_Length_1045,</p> <p>Sample1_Locus_18777_Transcript_2/4_Confidence_0.923_Length_1416,</p> <p>Sample3_Locus_5952_Transcript_4/4_Confidence_0.000_Length_2586,</p> <p>Sample6_Locus_15604_Transcript_2/4_Confidence_0.400_Length_1416,</p> <p>SampleTS2_Locus_819_Transcript_16/18_Confidence_0.250_Length_1000</p> <p>,</p> <p>SampleTS2_Locus_12618_Transcript_4/6_Confidence_0.571_Length_1272</p> <p>, Sample6_Locus_997_Transcript_9/17_Confidence_0.200_Length_950,</p> <p>SampleTS1_Locus_13725_Transcript_2/7_Confidence_0.333_Length_1080</p> <p>, Sample3_Locus_4596_Transcript_3/6_Confidence_0.400_Length_1157,</p> <p>Sample6_Locus_164_Transcript_78/296_Confidence_0.027_Length_1952,</p> <p>Sample3_Locus_2152_Transcript_2/3_Confidence_0.333_Length_1481,</p> <p>SampleTS3_Locus_6340_Transcript_1/1_Confidence_0.000_Length_1077,</p> <p>Sample3_Locus_2152_Transcript_2/3_Confidence_0.333_Length_1481,</p> <p>SampleTS3_Locus_6340_Transcript_1/1_Confidence_0.000_Length_1077,</p> <p>SampleTS3_Locus_456_Transcript_2/6_Confidence_0.200_Length_2075,</p> <p>Sample3_Locus_10443_Transcript_10/11_Confidence_0.700_Length_2690</p> <p>, Sample3_Locus_3334_Transcript_1/5_Confidence_0.400_Length_1030,</p> <p>Sample6_Locus_901_Transcript_6/8_Confidence_0.643_Length_1628,</p> <p>SampleTS2_Locus_8836_Transcript_1/2_Confidence_0.667_Length_1729,</p> <p>SampleTS3_Locus_5316_Transcript_1/2_Confidence_0.750_Length_1843,</p> <p>Sample3_Locus_10262_Transcript_4/5_Confidence_0.062_Length_1337,</p> <p>Sample6_Locus_2283_Transcript_7/17_Confidence_0.225_Length_1818,</p> <p>SampleTS2_Locus_1750_Transcript_17/20_Confidence_0.182_Length_156</p> <p>8, Sample6_Locus_901_Transcript_6/8_Confidence_0.643_Length_1628,</p> <p>SampleTS3_Locus_4546_Transcript_3/8_Confidence_0.429_Length_1895,</p> <p>SampleTS3_Locus_3403_Transcript_3/4_Confidence_0.333_Length_1292,</p> <p>SampleTS1_Locus_25259_Transcript_1/2_Confidence_0.333_Length_1099</p> <p>, Sample3_Locus_2806_Transcript_6/14_Confidence_0.167_Length_1197,</p> <p>SampleTS2_Locus_1881_Transcript_15/19_Confidence_0.439_Length_912</p> <p>,</p> <p>SampleTS3_Locus_2330_Transcript_4/4_Confidence_0.000_Length_1686,</p> <p>SampleTS1_Locus_16292_Transcript_4/5_Confidence_0.600_Length_1341</p> <p>, Sample3_Locus_4208_Transcript_8/15_Confidence_0.091_Length_2117,</p> <p>Sample3_Locus_40_Transcript_1/1_Confidence_0.000_Length_1702,</p> <p>Sample3_Locus_14770_Transcript_1/1_Confidence_0.000_Length_1819,</p> <p>SampleTS2_Locus_819_Transcript_16/18_Confidence_0.250_Length_1000</p> <p>,</p> <p>Sample1_Locus_7420_Transcript_10/14_Confidence_0.154_Length_1346,</p> <p>SampleTS2_Locus_12618_Transcript_4/6_Confidence_0.571_Length_1272</p> <p>, Sample6_Locus_997_Transcript_9/17_Confidence_0.200_Length_950,</p> <p>Sample1_Locus_393_Transcript_6/7_Confidence_0.556_Length_1466,</p> <p>Sample6_Locus_7028_Transcript_1/3_Confidence_0.750_Length_1269,</p> <p>SampleTS1_Locus_23304_Transcript_2/3_Confidence_0.333_Length_2324</p> <p>, Sample3_Locus_6377_Transcript_4/4_Confidence_0.125_Length_1830,</p> <p>Sample3_Locus_17004_Transcript_3/5_Confidence_0.286_Length_574,</p> <p>Sample3_Locus_3732_Transcript_3/7_Confidence_0.545_Length_970,</p> <p>Sample6_Locus_16912_Transcript_4/6_Confidence_0.286_Length_1521,</p> <p>Sample6_Locus_164_Transcript_78/296_Confidence_0.027_Length_1952,</p> <p>Sample6_Locus_81_Transcript_6/10_Confidence_0.421_Length_1354,</p> <p>Sample6_Locus_3108_Transcript_12/12_Confidence_0.019_Length_1297,</p> <p>SampleTS3_Locus_4699_Transcript_6/10_Confidence_0.579_Length_1963</p> <p>,</p> <p>SampleTS2_Locus_13350_Transcript_1/3_Confidence_0.778_Length_1614</p> |
|--|--|-----------------------------------------------------------------------------------------------------------------------------------------------------------------------------------------------------------------------------------------------------------------------------------------------------------------------------------------------------------------------------------------------------------------------------------------------------------------------------------------------------------------------------------------------------------------------------------------------------------------------------------------------------------------------------------------------------------------------------------------------------------------------------------------------------------------------------------------------------------------------------------------------------------------------------------------------------------------------------------------------------------------------------------------------------------------------------------------------------------------------------------|-------------------------------------------------------------------------------------------------------------------------------------------------------------------------------------------------------------------------------------------------------------------------------------------------------------------------------------------------------------------------------------------------------------------------------------------------------------------------------------------------------------------------------------------------------------------------------------------------------------------------------------------------------------------------------------------------------------------------------------------------------------------------------------------------------------------------------------------------------------------------------------------------------------------------------------------------------------------------------------------------------------------------------------------------------------------------------------------------------------------------------------------------------------------------------------------------------------------------------------------------------------------------------------------------------------------------------------------------------------------------------------------------------------------------------------------------------------------------------------------------------------------------------------------------------------------------------------------------------------------------------------------------------------------------------------------------------------------------------------------------------------------------------------------------------------------------------------------------------------------------------------------------------------------------------------------------------------------------------------------------------------------------------------------------------------------------------------------------------------------------------------------------------------------------------------------------------------------------------------------------------------------------------------------------------------------------------------------------------------------------------------------------------------------------------------------------------------------------------------------------------------------------------------------------------------------------------------------------------------------------------------------------------------------------------------------------------------------------------------------------------------------------------------------------------------------------------------------------------------------------------------------------------------------------------------------------------------------------------------------------------------------------------------------------------------------------------------------------------------------------------------------------------------------------------------------------------------------------------------------------------------------------------------------------------------------------------------------------------------------------------------------------------------------------------------------------------------------------------------------------------------------------------------------------------------------------------------------------------------------------------------------------------------------------------------------------------------------------------------------------------------------------------------------------------------------------------------------------------------------------------------------------------------------------------------------------------------------------------------------------------------------------------------------------------------------------------------------------------------------------------------------------------------------------------------------------------------------------------------------------------------------------------------------------------------------------------------------------------------------------------------------------------------------------------------------------------------------------------------------------------------------------------------------------------------------------------------------------------------------------------------------------------------------------------------------------------------------------------------------------------------------------------------------------------------------------------------------------------------------------------------------------------------------------------------------------------------------------------------------------------------------------------------------|

|  |  |                                                                                                                                                                                                                                                                                                                                                                                                                                                                                                                                                                                                                                                                                                                                                                                                                                                                                                                                                                                                                                                                                                                                      |                                                                                                                                                                                                                                                                                                                                                                                                                                                                                                                                                                                                                                                                                                                                                                                                                                                                                                                                                                                                                                                                                                                                                                                                                                                                                                                                                                                                                                                                                                                                                                                                                                                                                                                                                                                                                                                                                                                                                                                                                                                                                                                                                                                                                                                                                                                                                                                                                                                                                                                                                                                                                                                                                                                                                                                                                                                                                                                                                                                                                                                                                                                                                                                                                                                                                                                                                                                                                                                                                                                                                                                                                                                                                                                                                                                                                                                                                                                                                                                                                                                                                                                                                                                                                                                                                                                                                                                                                                                                                                                                                                                                                                                                                                                                                  |
|--|--|--------------------------------------------------------------------------------------------------------------------------------------------------------------------------------------------------------------------------------------------------------------------------------------------------------------------------------------------------------------------------------------------------------------------------------------------------------------------------------------------------------------------------------------------------------------------------------------------------------------------------------------------------------------------------------------------------------------------------------------------------------------------------------------------------------------------------------------------------------------------------------------------------------------------------------------------------------------------------------------------------------------------------------------------------------------------------------------------------------------------------------------|--------------------------------------------------------------------------------------------------------------------------------------------------------------------------------------------------------------------------------------------------------------------------------------------------------------------------------------------------------------------------------------------------------------------------------------------------------------------------------------------------------------------------------------------------------------------------------------------------------------------------------------------------------------------------------------------------------------------------------------------------------------------------------------------------------------------------------------------------------------------------------------------------------------------------------------------------------------------------------------------------------------------------------------------------------------------------------------------------------------------------------------------------------------------------------------------------------------------------------------------------------------------------------------------------------------------------------------------------------------------------------------------------------------------------------------------------------------------------------------------------------------------------------------------------------------------------------------------------------------------------------------------------------------------------------------------------------------------------------------------------------------------------------------------------------------------------------------------------------------------------------------------------------------------------------------------------------------------------------------------------------------------------------------------------------------------------------------------------------------------------------------------------------------------------------------------------------------------------------------------------------------------------------------------------------------------------------------------------------------------------------------------------------------------------------------------------------------------------------------------------------------------------------------------------------------------------------------------------------------------------------------------------------------------------------------------------------------------------------------------------------------------------------------------------------------------------------------------------------------------------------------------------------------------------------------------------------------------------------------------------------------------------------------------------------------------------------------------------------------------------------------------------------------------------------------------------------------------------------------------------------------------------------------------------------------------------------------------------------------------------------------------------------------------------------------------------------------------------------------------------------------------------------------------------------------------------------------------------------------------------------------------------------------------------------------------------------------------------------------------------------------------------------------------------------------------------------------------------------------------------------------------------------------------------------------------------------------------------------------------------------------------------------------------------------------------------------------------------------------------------------------------------------------------------------------------------------------------------------------------------------------------------------------------------------------------------------------------------------------------------------------------------------------------------------------------------------------------------------------------------------------------------------------------------------------------------------------------------------------------------------------------------------------------------------------------------------------------------------------------------|
|  |  | <p>reductase, ec:2.7.7.9<br/> uridylyltransferase, ec:1.2.1.12<br/> dehydrogenase (phosphorylating), ec:4.1.1.17<br/> decarboxylase, ec:2.3.1.30<br/> Oacetyltransferase, ec:2.3.1.35<br/> Nacetyltransferase, ec:2.7.1.148<br/> 5'diphospho)2C methylDerythritol kinase, ec:4.2.1.91<br/> dehydratase, ec:2.7.6.1<br/> diphosphokinas e, ec:1.17.1.8<br/> reductase, ec:1.8.1.4<br/> dehydrogenase, ec:2.5.1.1<br/> geranyldiphosphate synthase, ec:5.3.1.6<br/> isomerase, ec:5.3.1.9<br/> isomerase, ec:2.7.7.64<br/> uridylyltransferase, ec:3.1.3.3<br/> phosphatase, ec:1.1.1.2<br/> dehydrogenase (NADP+), ec:1.1.1.1<br/> dehydrogenase, ec:4.2.1.20<br/> synthase, ec:2.6.1.5<br/> transaminase, ec:2.6.1.9<br/> transaminase, ec:2.5.1.47<br/> synthase, ec:2.6.1.1<br/> transaminase, ec:2.6.1.4<br/> transaminase, ec:4.2.1.11<br/> hydratase, ec:5.3.3.2<br/> Deltaisomerase, ec:2.5.1.54<br/> synthase, ec:2.5.1.58<br/> farnesyltransferase, ec:4.2.1.17<br/> hydratase, ec:2.7.7.23<br/> diphosphorylase, ec:1.4.1.14<br/> synthase (NADH), ec:1.1.3.15<br/> oxidase, ec:1.1.1.86<br/> reductoisomerase (NADP+),</p> | <p>,<br/> SampleTS3_Locus_7085_Transcript_3/3_Confidence_0.000_Length_1349,<br/> SampleTS1_Locus_27877_Transcript_2/3_Confidence_0.333_Length_987,<br/> Sample3_Locus_9475_Transcript_2/2_Confidence_0.000_Length_1080,<br/> SampleTS1_Locus_12696_Transcript_3/3_Confidence_0.000_Length_1743<br/> ,<br/> SampleTS3_Locus_2330_Transcript_4/4_Confidence_0.000_Length_1686,<br/> SampleTS1_Locus_16292_Transcript_4/5_Confidence_0.600_Length_1341<br/> , Sample3_Locus_4208_Transcript_8/15_Confidence_0.091_Length_2117,<br/> Sample3_Locus_40_Transcript_1/1_Confidence_0.000_Length_1702,<br/> Sample3_Locus_14770_Transcript_1/1_Confidence_0.000_Length_1819,<br/> Sample1_Locus_18291_Transcript_1/1_Confidence_0.000_Length_647,<br/> Sample6_Locus_15547_Transcript_5/8_Confidence_0.545_Length_1332,<br/> Sample6_Locus_7369_Transcript_3/6_Confidence_0.200_Length_1828,<br/> SampleTS1_Locus_2734_Transcript_1/3_Confidence_0.333_Length_2491,<br/> SampleTS2_Locus_15764_Transcript_1/1_Confidence_0.000_Length_1068<br/> , Sample3_Locus_27117_Transcript_1/3_Confidence_0.250_Length_685,<br/> Sample6_Locus_6954_Transcript_4/5_Confidence_0.500_Length_1201,<br/> Sample6_Locus_4129_Transcript_8/27_Confidence_0.107_Length_571,<br/> SampleTS3_Locus_8149_Transcript_4/10_Confidence_0.118_Length_927,<br/> SampleTS1_Locus_6731_Transcript_14/15_Confidence_0.246_Length_230<br/> 3,<br/> SampleTS1_Locus_10087_Transcript_6/7_Confidence_0.167_Length_948,<br/> SampleTS2_Locus_4874_Transcript_6/12_Confidence_0.158_Length_1042<br/> ,<br/> Sample6_Locus_1524_Transcript_26/30_Confidence_0.185_Length_3215,<br/> SampleTS2_Locus_263_Transcript_1/3_Confidence_0.250_Length_2184,<br/> SampleTS3_Locus_400_Transcript_6/29_Confidence_0.422_Length_2479,<br/> SampleTS3_Locus_23264_Transcript_1/3_Confidence_0.500_Length_845,<br/> SampleTS3_Locus_9447_Transcript_3/3_Confidence_0.000_Length_886,<br/> Sample6_Locus_6882_Transcript_6/8_Confidence_0.429_Length_1475,<br/> SampleTS1_Locus_10894_Transcript_1/1_Confidence_0.000_Length_652,<br/> Sample1_Locus_26802_Transcript_1/2_Confidence_0.667_Length_439,<br/> Sample6_Locus_13664_Transcript_1/2_Confidence_0.333_Length_862,<br/> Sample1_Locus_26802_Transcript_1/2_Confidence_0.667_Length_439,<br/> Sample6_Locus_13664_Transcript_1/2_Confidence_0.333_Length_862,<br/> Sample1_Locus_15681_Transcript_1/1_Confidence_0.000_Length_1030,<br/> Sample6_Locus_5355_Transcript_5/8_Confidence_0.577_Length_1830,<br/> SampleTS2_Locus_2923_Transcript_3/4_Confidence_0.333_Length_1277,<br/> Sample1_Locus_26802_Transcript_1/2_Confidence_0.667_Length_439,<br/> Sample6_Locus_13664_Transcript_1/2_Confidence_0.333_Length_862,<br/> SampleTS2_Locus_6646_Transcript_2/2_Confidence_0.333_Length_1520,<br/> Sample6_Locus_2195_Transcript_14/16_Confidence_0.176_Length_1741,<br/> SampleTS3_Locus_714_Transcript_7/14_Confidence_0.087_Length_1194,<br/> Sample1_Locus_19449_Transcript_1/1_Confidence_0.000_Length_1704,<br/> SampleTS1_Locus_3608_Transcript_5/7_Confidence_0.222_Length_1514,<br/> Sample6_Locus_5354_Transcript_1/7_Confidence_0.333_Length_1260,<br/> Sample3_Locus_8990_Transcript_7/9_Confidence_0.091_Length_1811,<br/> SampleTS1_Locus_610_Transcript_52/54_Confidence_0.210_Length_1630<br/> ,<br/> SampleTS2_Locus_2631_Transcript_10/37_Confidence_0.203_Length_869<br/> ,<br/> SampleTS1_Locus_789_Transcript_9/11_Confidence_0.238_Length_2300,<br/> Sample3_Locus_5282_Transcript_2/7_Confidence_0.700_Length_1266,<br/> Sample3_Locus_4208_Transcript_8/15_Confidence_0.091_Length_2117,<br/> SampleTS3_Locus_21707_Transcript_1/2_Confidence_0.333_Length_2460<br/> ,<br/> SampleTS1_Locus_1310_Transcript_14/17_Confidence_0.222_Length_190<br/> 1, Sample3_Locus_1427_Transcript_1/1_Confidence_0.000_Length_746,<br/> Sample1_Locus_2001_Transcript_4/7_Confidence_0.600_Length_1686,<br/> SampleTS3_Locus_23038_Transcript_2/3_Confidence_0.333_Length_1864<br/> ,<br/> SampleTS2_Locus_4874_Transcript_6/12_Confidence_0.158_Length_1042<br/> , Sample3_Locus_23176_Transcript_2/3_Confidence_0.333_Length_1282,<br/> SampleTS1_Locus_5373_Transcript_26/33_Confidence_0.065_Length_162<br/> 0,<br/> Sample6_Locus_12695_Transcript_1/2_Confidence_0.333_Length_2218,<br/> SampleTS3_Locus_23264_Transcript_1/3_Confidence_0.500_Length_845,<br/> SampleTS2_Locus_1750_Transcript_17/20_Confidence_0.182_Length_156<br/> 8, Sample3_Locus_17004_Transcript_3/5_Confidence_0.286_Length_574,<br/> Sample3_Locus_3732_Transcript_3/7_Confidence_0.545_Length_970,<br/> Sample6_Locus_293_Transcript_1/2_Confidence_0.333_Length_875,<br/> SampleTS1_Locus_789_Transcript_9/11_Confidence_0.238_Length_2300,</p> |
|--|--|--------------------------------------------------------------------------------------------------------------------------------------------------------------------------------------------------------------------------------------------------------------------------------------------------------------------------------------------------------------------------------------------------------------------------------------------------------------------------------------------------------------------------------------------------------------------------------------------------------------------------------------------------------------------------------------------------------------------------------------------------------------------------------------------------------------------------------------------------------------------------------------------------------------------------------------------------------------------------------------------------------------------------------------------------------------------------------------------------------------------------------------|--------------------------------------------------------------------------------------------------------------------------------------------------------------------------------------------------------------------------------------------------------------------------------------------------------------------------------------------------------------------------------------------------------------------------------------------------------------------------------------------------------------------------------------------------------------------------------------------------------------------------------------------------------------------------------------------------------------------------------------------------------------------------------------------------------------------------------------------------------------------------------------------------------------------------------------------------------------------------------------------------------------------------------------------------------------------------------------------------------------------------------------------------------------------------------------------------------------------------------------------------------------------------------------------------------------------------------------------------------------------------------------------------------------------------------------------------------------------------------------------------------------------------------------------------------------------------------------------------------------------------------------------------------------------------------------------------------------------------------------------------------------------------------------------------------------------------------------------------------------------------------------------------------------------------------------------------------------------------------------------------------------------------------------------------------------------------------------------------------------------------------------------------------------------------------------------------------------------------------------------------------------------------------------------------------------------------------------------------------------------------------------------------------------------------------------------------------------------------------------------------------------------------------------------------------------------------------------------------------------------------------------------------------------------------------------------------------------------------------------------------------------------------------------------------------------------------------------------------------------------------------------------------------------------------------------------------------------------------------------------------------------------------------------------------------------------------------------------------------------------------------------------------------------------------------------------------------------------------------------------------------------------------------------------------------------------------------------------------------------------------------------------------------------------------------------------------------------------------------------------------------------------------------------------------------------------------------------------------------------------------------------------------------------------------------------------------------------------------------------------------------------------------------------------------------------------------------------------------------------------------------------------------------------------------------------------------------------------------------------------------------------------------------------------------------------------------------------------------------------------------------------------------------------------------------------------------------------------------------------------------------------------------------------------------------------------------------------------------------------------------------------------------------------------------------------------------------------------------------------------------------------------------------------------------------------------------------------------------------------------------------------------------------------------------------------------------------------------------------------------------|

|  |  |                                                                                                                                                                                                                                                                                                                                                                                                                                                                                                                                                                                                                                                                                                                                                   |                                                                                                                                                                                                                                                                                                                                                                                                                                                                                                                                                                                                                                                                                                                                                                                                                                                                                                                                                                                                                                                                                                                                                                                                                                                                                                                                                                                                                                                                                                                                                                                                                                                                                                                                                                                   |
|--|--|---------------------------------------------------------------------------------------------------------------------------------------------------------------------------------------------------------------------------------------------------------------------------------------------------------------------------------------------------------------------------------------------------------------------------------------------------------------------------------------------------------------------------------------------------------------------------------------------------------------------------------------------------------------------------------------------------------------------------------------------------|-----------------------------------------------------------------------------------------------------------------------------------------------------------------------------------------------------------------------------------------------------------------------------------------------------------------------------------------------------------------------------------------------------------------------------------------------------------------------------------------------------------------------------------------------------------------------------------------------------------------------------------------------------------------------------------------------------------------------------------------------------------------------------------------------------------------------------------------------------------------------------------------------------------------------------------------------------------------------------------------------------------------------------------------------------------------------------------------------------------------------------------------------------------------------------------------------------------------------------------------------------------------------------------------------------------------------------------------------------------------------------------------------------------------------------------------------------------------------------------------------------------------------------------------------------------------------------------------------------------------------------------------------------------------------------------------------------------------------------------------------------------------------------------|
|  |  | <p>ec:1.2.1.3 dehydrogenase (NAD+),<br/> ec:2.3.1.9 Cacetyltransferase, ec:2.3.1.1 Nacetyltransferase, ec:1.1.1.37 dehydrogenase, ec:1.1.1.35 dehydrogenase, ec:4.4.1.1 gammalyase, ec:1.1.1.44 dehydrogenase (NADP+dependent, decarboxylating), ec:1.1.1.49 dehydrogenase (NADP+), ec:4.3.3.7 synthase, ec:5.4.2.8 mannose phosphomutase, ec:6.3.5.3 synthase, ec:1.14.13.70 14alphademethylase, ec:2.3.3.8 citrate synthase, ec:1.5.1.2 reductase, ec:2.4.2.14 phosphoribosyl diphosphate Samidotransferase, ec:2.3.3.1 (Si)synthase, ec:1.2.4.2 dehydrogenase (succinyltransfering), ec:1.2.4.1 dehydrogenase (acetyltransfering), ec:1.2.4.4 dehydrogenase (2methylpropanoyltransfering), ec:5.1.3.13 3,5epimerase, ec:5.3.1.24 isomerase</p> | <p>SampleTS3_Locus_1827_Transcript_3/3_Confidence_0.000_Length_1033, SampleTS3_Locus_11808_Transcript_9/11_Confidence_0.565_Length_1006, Sample6_Locus_5355_Transcript_5/8_Confidence_0.577_Length_1830, SampleTS2_Locus_2923_Transcript_3/4_Confidence_0.333_Length_1277, Sample6_Locus_10552_Transcript_5/5_Confidence_0.000_Length_1013, SampleTS1_Locus_3938_Transcript_9/14_Confidence_0.467_Length_2040, SampleTS1_Locus_4380_Transcript_8/12_Confidence_0.400_Length_2044, SampleTS3_Locus_2991_Transcript_5/8_Confidence_0.400_Length_1799, SampleTS1_Locus_10980_Transcript_1/3_Confidence_0.667_Length_1432, Sample1_Locus_10139_Transcript_1/10_Confidence_0.538_Length_1144, Sample6_Locus_17319_Transcript_1/1_Confidence_0.000_Length_1109, Sample1_Locus_10749_Transcript_3/5_Confidence_0.800_Length_2198, SampleTS2_Locus_4266_Transcript_1/3_Confidence_0.333_Length_1522, SampleTS3_Locus_443_Transcript_4/7_Confidence_0.429_Length_1718, SampleTS1_Locus_743_Transcript_11/14_Confidence_0.154_Length_1525, Sample3_Locus_10439_Transcript_3/6_Confidence_0.667_Length_1846, SampleTS2_Locus_4114_Transcript_5/7_Confidence_0.267_Length_2080, Sample6_Locus_6489_Transcript_7/13_Confidence_0.200_Length_1232, SampleTS2_Locus_3113_Transcript_1/3_Confidence_0.667_Length_750, SampleTS3_Locus_20806_Transcript_1/1_Confidence_0.000_Length_3106, Sample3_Locus_1003_Transcript_1/3_Confidence_0.750_Length_1416, SampleTS2_Locus_9103_Transcript_1/2_Confidence_0.667_Length_685, Sample1_Locus_24165_Transcript_4/4_Confidence_0.444_Length_605, SampleTS2_Locus_9103_Transcript_1/2_Confidence_0.667_Length_685, Sample3_Locus_2806_Transcript_6/14_Confidence_0.167_Length_1197, SampleTS1_Locus_12931_Transcript_3/3_Confidence_0.200_Length_1113</p> |
|--|--|---------------------------------------------------------------------------------------------------------------------------------------------------------------------------------------------------------------------------------------------------------------------------------------------------------------------------------------------------------------------------------------------------------------------------------------------------------------------------------------------------------------------------------------------------------------------------------------------------------------------------------------------------------------------------------------------------------------------------------------------------|-----------------------------------------------------------------------------------------------------------------------------------------------------------------------------------------------------------------------------------------------------------------------------------------------------------------------------------------------------------------------------------------------------------------------------------------------------------------------------------------------------------------------------------------------------------------------------------------------------------------------------------------------------------------------------------------------------------------------------------------------------------------------------------------------------------------------------------------------------------------------------------------------------------------------------------------------------------------------------------------------------------------------------------------------------------------------------------------------------------------------------------------------------------------------------------------------------------------------------------------------------------------------------------------------------------------------------------------------------------------------------------------------------------------------------------------------------------------------------------------------------------------------------------------------------------------------------------------------------------------------------------------------------------------------------------------------------------------------------------------------------------------------------------|

|                                 |                 |           |                                                                                                                                                                                                                                                                                                                                                                                                                                                                                                                                                                                                                                                                                                                                                                                                                                                                                                                                                                                                                                                               |                                                                                                                                                                                                                                                            |                                                                                                                                                                                                                                                                         |
|---------------------------------|-----------------|-----------|---------------------------------------------------------------------------------------------------------------------------------------------------------------------------------------------------------------------------------------------------------------------------------------------------------------------------------------------------------------------------------------------------------------------------------------------------------------------------------------------------------------------------------------------------------------------------------------------------------------------------------------------------------------------------------------------------------------------------------------------------------------------------------------------------------------------------------------------------------------------------------------------------------------------------------------------------------------------------------------------------------------------------------------------------------------|------------------------------------------------------------------------------------------------------------------------------------------------------------------------------------------------------------------------------------------------------------|-------------------------------------------------------------------------------------------------------------------------------------------------------------------------------------------------------------------------------------------------------------------------|
| <p><b>Purine metabolism</b></p> | <p>map00230</p> | <p>39</p> | <p>ec:6.3.3.1 cycloligase,<br/> ec:2.1.2.2 formyltransferase, ec:2.7.4.8 kinase,<br/> ec:2.7.4.6 kinase,<br/> ec:2.7.4.3 kinase,<br/> ec:3.5.2.5 ec:3.5.2.5<br/> allantoinase,<br/> ec:6.3.4.4 synthase,<br/> ec:3.6.1.3 adenylypyrophosphatase,<br/> ec:3.6.1.6 diphosphate phosphatase,<br/> ec:3.6.1.9 diphosphatase,<br/> ec:4.1.1.21 carboxylase,<br/> ec:3.1.4.17 phosphodiesterase, ec:3.5.4.4 deaminase,<br/> ec:1.17.4.1 reductase,<br/> ec:2.7.1.40 kinase,<br/> ec:3.5.4.6 deaminase,<br/> ec:6.3.2.6 synthase,<br/> ec:3.1.4.35 phosphodiesterase, ec:2.7.1.25 kinase,<br/> ec:2.7.1.20 kinase,<br/> ec:3.6.1.13 diphosphatase,<br/> ec:3.6.1.15 phosphatase,<br/> ec:2.7.7.4 adenylyltransferase,<br/> ec:3.6.1.21 diphosphatase,<br/> ec:3.6.1.29 dinucleosidetriphosphatase,<br/> ec:2.7.7.6 RNA polymerase,<br/> ec:2.7.7.7 DNA polymerase,<br/> ec:2.7.6.5 diphosphokinase, ec:2.7.6.1 diphosphokinase, ec:1.7.3.3 urate hydroxylase,<br/> ec:4.6.1.1 cyclase,<br/> ec:4.6.1.2 cyclase,<br/> ec:1.1.1.205 dehydrogenase,<br/> ec:3.1.7.2</p> | <p>2, 1,<br/> 4, 5,<br/> 7, 1,<br/> 1,<br/> 215,<br/> 5, 5,<br/> 2,<br/> 48,<br/> 3, 1,<br/> 7, 1,<br/> 1,<br/> 27,<br/> 2, 1,<br/> 2,<br/> 278,<br/> 3, 4,<br/> 2,<br/> 11,<br/> 6, 1,<br/> 1, 1,<br/> 10,<br/> 8, 1,<br/> 2, 2,<br/> 1, 2,<br/> 1, 1</p> | <p>SampleTS1_Locus_2676_Transcript_23/50_Confidence_0.046_Length_813 , Sample3_Locus_8866_Transcript_2/4_Confidence_0.714_Length_1157, SampleTS2_Locus_12481_Transcript_10/11_Confidence_0.194_Length_1103, SampleTS1_Locus_6152_Transcript_2/7_Confidence_0.375_Le</p> |
|---------------------------------|-----------------|-----------|---------------------------------------------------------------------------------------------------------------------------------------------------------------------------------------------------------------------------------------------------------------------------------------------------------------------------------------------------------------------------------------------------------------------------------------------------------------------------------------------------------------------------------------------------------------------------------------------------------------------------------------------------------------------------------------------------------------------------------------------------------------------------------------------------------------------------------------------------------------------------------------------------------------------------------------------------------------------------------------------------------------------------------------------------------------|------------------------------------------------------------------------------------------------------------------------------------------------------------------------------------------------------------------------------------------------------------|-------------------------------------------------------------------------------------------------------------------------------------------------------------------------------------------------------------------------------------------------------------------------|

|  |  |  |                                                                                                                                                                                                                                           |  |  |
|--|--|--|-------------------------------------------------------------------------------------------------------------------------------------------------------------------------------------------------------------------------------------------|--|--|
|  |  |  | 3'diphosphatase, ec:6.3.5.3<br>synthase,<br>ec:2.4.2.14<br>phosphoribosyl<br>diphosphate<br>5amidotransferase, ec:2.4.2.7<br>phosphoribosyltransferase,<br>ec:2.4.2.8<br>phosphoribosyltransferase,<br>ec:3.5.1.5<br>ec:3.5.1.5<br>urease |  |  |
|--|--|--|-------------------------------------------------------------------------------------------------------------------------------------------------------------------------------------------------------------------------------------------|--|--|



|                     |          |    |                                                                                                                                                                                                                                                                                                                                                                                                                                                                                                                                                                                                                                                                                                                                                                                                                                                                                 |                                                                               |                                                                                                                                                                                                                                                                                                                                                                                                                                                                                                                                                                                                                                                                                                                                                                                                                                                                                                                                                                                                                                                                                                                                                                                                                                                                                                                                                                                                                                                                                                                                                                                                                                                                                                                                                                                                                                                                                                                                                                                                                                                                                                                                                                                                                                                                                                                                                                                                                                                                                                                                                                                                                                                                                                                                                                                                                                                                                                                                                                                                                                                                                                                                                                                                                                                                                                                                                                                                                        |
|---------------------|----------|----|---------------------------------------------------------------------------------------------------------------------------------------------------------------------------------------------------------------------------------------------------------------------------------------------------------------------------------------------------------------------------------------------------------------------------------------------------------------------------------------------------------------------------------------------------------------------------------------------------------------------------------------------------------------------------------------------------------------------------------------------------------------------------------------------------------------------------------------------------------------------------------|-------------------------------------------------------------------------------|------------------------------------------------------------------------------------------------------------------------------------------------------------------------------------------------------------------------------------------------------------------------------------------------------------------------------------------------------------------------------------------------------------------------------------------------------------------------------------------------------------------------------------------------------------------------------------------------------------------------------------------------------------------------------------------------------------------------------------------------------------------------------------------------------------------------------------------------------------------------------------------------------------------------------------------------------------------------------------------------------------------------------------------------------------------------------------------------------------------------------------------------------------------------------------------------------------------------------------------------------------------------------------------------------------------------------------------------------------------------------------------------------------------------------------------------------------------------------------------------------------------------------------------------------------------------------------------------------------------------------------------------------------------------------------------------------------------------------------------------------------------------------------------------------------------------------------------------------------------------------------------------------------------------------------------------------------------------------------------------------------------------------------------------------------------------------------------------------------------------------------------------------------------------------------------------------------------------------------------------------------------------------------------------------------------------------------------------------------------------------------------------------------------------------------------------------------------------------------------------------------------------------------------------------------------------------------------------------------------------------------------------------------------------------------------------------------------------------------------------------------------------------------------------------------------------------------------------------------------------------------------------------------------------------------------------------------------------------------------------------------------------------------------------------------------------------------------------------------------------------------------------------------------------------------------------------------------------------------------------------------------------------------------------------------------------------------------------------------------------------------------------------------------------|
| Pyruvate metabolism | map00620 | 27 | <p>ec:6.4.1.2 carboxylase, ec:2.3.3.13 synthase, ec:4.1.1.49 carboxykinase (ATP), ec:3.6.1.7 acetylphosphatase, ec:4.1.1.31 carboxylase, ec:4.1.1.32 carboxykinase (GTP), ec:4.2.1.2 hydratase, ec:2.7.1.40 kinase, ec:4.1.1.3 decarboxylase, ec:6.2.1.1 ligase, ec:2.3.1.12 acetyltransferase, ec:1.2.1.10 dehydrogenase (acetylating), ec:2.3.1.54 Cacetyltransferase, ec:1.8.1.4 dehydrogenase, ec:3.1.2.6 hydrolase, ec:1.1.2.3 dehydrogenase (cytochrome), ec:1.1.2.4 dehydrogenase (cytochrome), ec:2.7.9.1 phosphate dikinase, ec:1.2.1.3 dehydrogenase (NAD+), ec:2.3.1.9 Cacetyltransferase, ec:1.1.1.37 dehydrogenase, ec:4.4.1.5 lyase, ec:1.1.1.38 dehydrogenase (oxaloacetatede carboxylating), ec:1.1.1.40 dehydrogenase (oxaloacetatede carboxylating) (NADP+), ec:2.3.3.9 synthase, ec:1.1.1.28 dehydrogenase, ec:1.2.4.1 dehydrogenase (acetyltransfering)</p> | <p>2, 1, 1, 1, 1, 1, 1, 2, 2, 3, 1, 2, 2, 1, 3, 6, 1, 1, 1, 1, 2, 1, 1, 2</p> | <p>Sample3_Locus_8920_Transcript_2/3_Confidence_0.333_Length_2038, SampleTS1_Locus_1155_Transcript_11/16_Confidence_0.625_Length_2240, Sample1_Locus_7894_Transcript_1/3_Confidence_0.250_Length_2075, Sample6_Locus_11174_Transcript_1/1_Confidence_0.000_Length_1998, SampleTS3_Locus_13938_Transcript_1/2_Confidence_0.333_Length_655, Sample3_Locus_7378_Transcript_3/6_Confidence_0.417_Length_3416, Sample6_Locus_11174_Transcript_1/1_Confidence_0.000_Length_1998, Sample3_Locus_2252_Transcript_9/13_Confidence_0.647_Length_1708, Sample6_Locus_1413_Transcript_3/3_Confidence_0.000_Length_1802, Sample6_Locus_12247_Transcript_7/9_Confidence_0.429_Length_1396, SampleTS1_Locus_11723_Transcript_6/16_Confidence_0.073_Length_1679, SampleTS1_Locus_7761_Transcript_5/10_Confidence_0.105_Length_1358, SampleTS2_Locus_14711_Transcript_4/7_Confidence_0.273_Length_1393, Sample6_Locus_2327_Transcript_47/56_Confidence_0.195_Length_2423, Sample6_Locus_22851_Transcript_2/3_Confidence_0.714_Length_1077, SampleTS1_Locus_2696_Transcript_4/6_Confidence_0.545_Length_1155, SampleTS2_Locus_3140_Transcript_18/19_Confidence_0.323_Length_745, SampleTS3_Locus_456_Transcript_2/6_Confidence_0.200_Length_2075, SampleTS2_Locus_8836_Transcript_1/2_Confidence_0.667_Length_1729, SampleTS3_Locus_5316_Transcript_1/2_Confidence_0.750_Length_1843, SampleTS3_Locus_400_Transcript_6/29_Confidence_0.422_Length_2479, Sample6_Locus_1524_Transcript_26/30_Confidence_0.185_Length_3215, Sample6_Locus_961_Transcript_2/3_Confidence_0.250_Length_1478, Sample1_Locus_27983_Transcript_6/13_Confidence_0.294_Length_763, SampleTS2_Locus_20366_Transcript_1/7_Confidence_0.273_Length_670, SampleTS3_Locus_4699_Transcript_6/10_Confidence_0.579_Length_1963, Sample1_Locus_24616_Transcript_1/1_Confidence_0.000_Length_806, SampleTS3_Locus_23179_Transcript_2/6_Confidence_0.500_Length_1144, Sample3_Locus_1427_Transcript_1/1_Confidence_0.000_Length_746, SampleTS2_Locus_13872_Transcript_6/7_Confidence_0.500_Length_988, Sample6_Locus_3300_Transcript_2/5_Confidence_0.700_Length_1810, SampleTS1_Locus_793_Transcript_3/3_Confidence_0.000_Length_1036, Sample6_Locus_2229_Transcript_3/3_Confidence_0.000_Length_1460, SampleTS2_Locus_3926_Transcript_9/12_Confidence_0.038_Length_2167, SampleTS3_Locus_23038_Transcript_2/3_Confidence_0.333_Length_1864, SampleTS2_Locus_4874_Transcript_6/12_Confidence_0.158_Length_1042, Sample3_Locus_23176_Transcript_2/3_Confidence_0.333_Length_1282, SampleTS1_Locus_5373_Transcript_26/33_Confidence_0.065_Length_1620, Sample6_Locus_12695_Transcript_1/2_Confidence_0.333_Length_2218, SampleTS3_Locus_23264_Transcript_1/3_Confidence_0.500_Length_845, SampleTS2_Locus_1750_Transcript_17/20_Confidence_0.182_Length_1568, Sample6_Locus_293_Transcript_1/2_Confidence_0.333_Length_875, SampleTS3_Locus_10192_Transcript_2/2_Confidence_0.333_Length_1357, SampleTS2_Locus_3140_Transcript_18/19_Confidence_0.323_Length_745, Sample3_Locus_24109_Transcript_4/4_Confidence_0.000_Length_2026, SampleTS2_Locus_3140_Transcript_18/19_Confidence_0.323_Length_745, SampleTS1_Locus_8328_Transcript_7/9_Confidence_0.407_Length_1307, Sample6_Locus_1387_Transcript_42/45_Confidence_0.033_Length_1697, Sample3_Locus_1003_Transcript_1/3_Confidence_0.750_Length_1416, SampleTS2_Locus_9103_Transcript_1/2_Confidence_0.667_Length_685</p> |
|---------------------|----------|----|---------------------------------------------------------------------------------------------------------------------------------------------------------------------------------------------------------------------------------------------------------------------------------------------------------------------------------------------------------------------------------------------------------------------------------------------------------------------------------------------------------------------------------------------------------------------------------------------------------------------------------------------------------------------------------------------------------------------------------------------------------------------------------------------------------------------------------------------------------------------------------|-------------------------------------------------------------------------------|------------------------------------------------------------------------------------------------------------------------------------------------------------------------------------------------------------------------------------------------------------------------------------------------------------------------------------------------------------------------------------------------------------------------------------------------------------------------------------------------------------------------------------------------------------------------------------------------------------------------------------------------------------------------------------------------------------------------------------------------------------------------------------------------------------------------------------------------------------------------------------------------------------------------------------------------------------------------------------------------------------------------------------------------------------------------------------------------------------------------------------------------------------------------------------------------------------------------------------------------------------------------------------------------------------------------------------------------------------------------------------------------------------------------------------------------------------------------------------------------------------------------------------------------------------------------------------------------------------------------------------------------------------------------------------------------------------------------------------------------------------------------------------------------------------------------------------------------------------------------------------------------------------------------------------------------------------------------------------------------------------------------------------------------------------------------------------------------------------------------------------------------------------------------------------------------------------------------------------------------------------------------------------------------------------------------------------------------------------------------------------------------------------------------------------------------------------------------------------------------------------------------------------------------------------------------------------------------------------------------------------------------------------------------------------------------------------------------------------------------------------------------------------------------------------------------------------------------------------------------------------------------------------------------------------------------------------------------------------------------------------------------------------------------------------------------------------------------------------------------------------------------------------------------------------------------------------------------------------------------------------------------------------------------------------------------------------------------------------------------------------------------------------------------|

|                                                           |                 |           |                                                                                                                                                                                                                                                                                                                                                                                                                                                                                                                                                                                                                                                                                                                                                                                                                                                                                                                                                                                                                                                                                                                                |                                                                                                                                  |                                                                                                                                                                                                                                                                                                                                                                                                                                                                                                                                                                                                                                                                                                                                                                                                                                                                                                                                                                                                                                                                                                                                                                                                                                                                                                                                                                                                                                                                                                                                                                                                                                                                                                                                                                                                                                                                                                                                                                                                                                                                                                                                                                                                                                                                                                                                                                                                                                                                                                                                                                                                                                                                                                                                      |
|-----------------------------------------------------------|-----------------|-----------|--------------------------------------------------------------------------------------------------------------------------------------------------------------------------------------------------------------------------------------------------------------------------------------------------------------------------------------------------------------------------------------------------------------------------------------------------------------------------------------------------------------------------------------------------------------------------------------------------------------------------------------------------------------------------------------------------------------------------------------------------------------------------------------------------------------------------------------------------------------------------------------------------------------------------------------------------------------------------------------------------------------------------------------------------------------------------------------------------------------------------------|----------------------------------------------------------------------------------------------------------------------------------|--------------------------------------------------------------------------------------------------------------------------------------------------------------------------------------------------------------------------------------------------------------------------------------------------------------------------------------------------------------------------------------------------------------------------------------------------------------------------------------------------------------------------------------------------------------------------------------------------------------------------------------------------------------------------------------------------------------------------------------------------------------------------------------------------------------------------------------------------------------------------------------------------------------------------------------------------------------------------------------------------------------------------------------------------------------------------------------------------------------------------------------------------------------------------------------------------------------------------------------------------------------------------------------------------------------------------------------------------------------------------------------------------------------------------------------------------------------------------------------------------------------------------------------------------------------------------------------------------------------------------------------------------------------------------------------------------------------------------------------------------------------------------------------------------------------------------------------------------------------------------------------------------------------------------------------------------------------------------------------------------------------------------------------------------------------------------------------------------------------------------------------------------------------------------------------------------------------------------------------------------------------------------------------------------------------------------------------------------------------------------------------------------------------------------------------------------------------------------------------------------------------------------------------------------------------------------------------------------------------------------------------------------------------------------------------------------------------------------------------|
| <p><b>Amino sugar and nucleotide sugar metabolism</b></p> | <p>map00520</p> | <p>25</p> | <p>ec:2.6.1.16<br/>transaminase<br/>(isomerizing),<br/>ec:2.7.1.44<br/>galacturonokina<br/>se<br/>(phosphorylatin<br/>g) Dgalacturonic<br/>acid kinase,<br/>ec:2.7.1.2<br/>glucokinase<br/>(phosphorylatin<br/>g), ec:2.7.1.1<br/>hexokinase type<br/>IV glucokinase,<br/>ec:2.7.1.6<br/>galactokinase<br/>(phosphorylatin<br/>g), ec:2.7.1.4<br/>fructokinase<br/>(phosphorylatin<br/>g), ec:5.1.3.2<br/>4epimerase,<br/>ec:5.1.3.7<br/>4epimerase,<br/>ec:5.1.3.5<br/>4epimerase,<br/>ec:4.2.1.76<br/>4,6dehydratase,<br/>ec:2.7.7.9<br/>uridylyltransfer<br/>ase, ec:5.3.1.9<br/>isomerase,<br/>ec:2.7.7.64<br/>uridylyltransfer<br/>ase,<br/>ec:5.4.99.30<br/>mutase,<br/>ec:2.7.7.44<br/>uridylyltransfer<br/>ase, ec:2.7.7.27<br/>adenylyltransfe<br/>rase,<br/>ec:2.7.7.22<br/>guanylyltransfer<br/>ase (GDP),<br/>ec:2.7.7.23<br/>diphosphorylas<br/>e, ec:2.7.7.10<br/>uridylyltransfer<br/>ase, ec:1.6.2.2<br/>reductase,<br/>ec:2.3.1.4<br/>Nacetyltransfer<br/>ase, ec:5.4.2.8<br/>mannose<br/>phosphomutase<br/>, ec:1.1.1.22<br/>6dehydrogenas<br/>e, ec:5.1.3.18<br/>3,5epimerase,<br/>ec:3.2.1.14<br/>ChiC</p> | <p>1, 1,<br/>1, 1,<br/>2, 1,<br/>1, 1,<br/>1, 1,<br/>5, 1,<br/>5, 1,<br/>1, 1,<br/>1, 1,<br/>1, 3,<br/>1, 1,<br/>2, 1,<br/>2</p> | <p>Sample6_Locus_5350_Transcript_7/9_Confidence_0.333_Length_2351,<br/>Sample3_Locus_7508_Transcript_1/2_Confidence_0.333_Length_994,<br/>Sample6_Locus_5095_Transcript_5/8_Confidence_0.300_Length_1241,<br/>Sample6_Locus_5095_Transcript_5/8_Confidence_0.300_Length_1241,<br/>Sample3_Locus_7188_Transcript_3/12_Confidence_0.615_Length_971,<br/>Sample3_Locus_7508_Transcript_1/2_Confidence_0.333_Length_994,<br/>Sample6_Locus_5095_Transcript_5/8_Confidence_0.300_Length_1241,<br/>SampleTS2_Locus_4938_Transcript_4/9_Confidence_0.273_Length_771,<br/>SampleTS2_Locus_4938_Transcript_4/9_Confidence_0.273_Length_771,<br/>SampleTS2_Locus_4938_Transcript_4/9_Confidence_0.273_Length_771,<br/>Sample3_Locus_2806_Transcript_6/14_Confidence_0.167_Length_1197,<br/>SampleTS3_Locus_2330_Transcript_4/4_Confidence_0.000_Length_1686,<br/>SampleTS1_Locus_16292_Transcript_4/5_Confidence_0.600_Length_1341<br/>, Sample3_Locus_4208_Transcript_8/15_Confidence_0.091_Length_2117,<br/>Sample3_Locus_40_Transcript_1/1_Confidence_0.000_Length_1702,<br/>Sample3_Locus_14770_Transcript_1/1_Confidence_0.000_Length_1819,<br/>SampleTS1_Locus_12696_Transcript_3/3_Confidence_0.000_Length_1743<br/>,<br/>SampleTS3_Locus_2330_Transcript_4/4_Confidence_0.000_Length_1686,<br/>SampleTS1_Locus_16292_Transcript_4/5_Confidence_0.600_Length_1341<br/>, Sample3_Locus_4208_Transcript_8/15_Confidence_0.091_Length_2117,<br/>Sample3_Locus_40_Transcript_1/1_Confidence_0.000_Length_1702,<br/>Sample3_Locus_14770_Transcript_1/1_Confidence_0.000_Length_1819,<br/>SampleTS1_Locus_24714_Transcript_1/1_Confidence_0.000_Length_794,<br/>SampleTS3_Locus_2330_Transcript_4/4_Confidence_0.000_Length_1686,<br/>Sample3_Locus_6692_Transcript_2/3_Confidence_0.333_Length_1421,<br/>Sample3_Locus_982_Transcript_1/1_Confidence_0.000_Length_2070,<br/>Sample3_Locus_4208_Transcript_8/15_Confidence_0.091_Length_2117,<br/>SampleTS3_Locus_2330_Transcript_4/4_Confidence_0.000_Length_1686,<br/>SampleTS1_Locus_26901_Transcript_2/4_Confidence_0.095_Length_536,<br/>SampleTS2_Locus_13872_Transcript_6/7_Confidence_0.500_Length_988,<br/>Sample3_Locus_15798_Transcript_2/3_Confidence_0.333_Length_1030,<br/>Sample1_Locus_22_Transcript_24/64_Confidence_0.125_Length_1686,<br/>Sample1_Locus_10139_Transcript_1/10_Confidence_0.538_Length_1144,<br/>SampleTS3_Locus_1975_Transcript_19/64_Confidence_0.064_Length_546<br/>, SampleTS2_Locus_4_Transcript_35/36_Confidence_0.021_Length_1580,<br/>Sample3_Locus_22932_Transcript_1/1_Confidence_0.000_Length_1277,<br/>Sample3_Locus_17381_Transcript_6/8_Confidence_0.324_Length_685,<br/>SampleTS1_Locus_7160_Transcript_3/3_Confidence_0.333_Length_2188</p> |
|-----------------------------------------------------------|-----------------|-----------|--------------------------------------------------------------------------------------------------------------------------------------------------------------------------------------------------------------------------------------------------------------------------------------------------------------------------------------------------------------------------------------------------------------------------------------------------------------------------------------------------------------------------------------------------------------------------------------------------------------------------------------------------------------------------------------------------------------------------------------------------------------------------------------------------------------------------------------------------------------------------------------------------------------------------------------------------------------------------------------------------------------------------------------------------------------------------------------------------------------------------------|----------------------------------------------------------------------------------------------------------------------------------|--------------------------------------------------------------------------------------------------------------------------------------------------------------------------------------------------------------------------------------------------------------------------------------------------------------------------------------------------------------------------------------------------------------------------------------------------------------------------------------------------------------------------------------------------------------------------------------------------------------------------------------------------------------------------------------------------------------------------------------------------------------------------------------------------------------------------------------------------------------------------------------------------------------------------------------------------------------------------------------------------------------------------------------------------------------------------------------------------------------------------------------------------------------------------------------------------------------------------------------------------------------------------------------------------------------------------------------------------------------------------------------------------------------------------------------------------------------------------------------------------------------------------------------------------------------------------------------------------------------------------------------------------------------------------------------------------------------------------------------------------------------------------------------------------------------------------------------------------------------------------------------------------------------------------------------------------------------------------------------------------------------------------------------------------------------------------------------------------------------------------------------------------------------------------------------------------------------------------------------------------------------------------------------------------------------------------------------------------------------------------------------------------------------------------------------------------------------------------------------------------------------------------------------------------------------------------------------------------------------------------------------------------------------------------------------------------------------------------------------|

|                                     |          |    |                                                                                                                                                                                                                                                                                                                                                                                                                                                                                                                                                                                                                                                                                                                                                                                                                                                                        |                                                                                                 |                                                                                                                                                                                                                                                                                                                                                                                                                                                                                                                                                                                                                                                                                                                                                                                                                                                                                                                                                                                                                                                                                                                                                                                                                                                                                                                                                                                                                                                                                                                                                                                                                                                                                                                                                                                                                                                                                                                                                                                                                                                                                                                                                                                                                                                                                                                                                                                                                                                                                                                                                                                                                                                                                                                                                                                                                                                                                                                                                                                                                                                                                                                                                                                                                                                                                                                                                                                                                                                                                                                                                                                                                                                                                                                                                                                                                                                                                                                                                                                 |
|-------------------------------------|----------|----|------------------------------------------------------------------------------------------------------------------------------------------------------------------------------------------------------------------------------------------------------------------------------------------------------------------------------------------------------------------------------------------------------------------------------------------------------------------------------------------------------------------------------------------------------------------------------------------------------------------------------------------------------------------------------------------------------------------------------------------------------------------------------------------------------------------------------------------------------------------------|-------------------------------------------------------------------------------------------------|---------------------------------------------------------------------------------------------------------------------------------------------------------------------------------------------------------------------------------------------------------------------------------------------------------------------------------------------------------------------------------------------------------------------------------------------------------------------------------------------------------------------------------------------------------------------------------------------------------------------------------------------------------------------------------------------------------------------------------------------------------------------------------------------------------------------------------------------------------------------------------------------------------------------------------------------------------------------------------------------------------------------------------------------------------------------------------------------------------------------------------------------------------------------------------------------------------------------------------------------------------------------------------------------------------------------------------------------------------------------------------------------------------------------------------------------------------------------------------------------------------------------------------------------------------------------------------------------------------------------------------------------------------------------------------------------------------------------------------------------------------------------------------------------------------------------------------------------------------------------------------------------------------------------------------------------------------------------------------------------------------------------------------------------------------------------------------------------------------------------------------------------------------------------------------------------------------------------------------------------------------------------------------------------------------------------------------------------------------------------------------------------------------------------------------------------------------------------------------------------------------------------------------------------------------------------------------------------------------------------------------------------------------------------------------------------------------------------------------------------------------------------------------------------------------------------------------------------------------------------------------------------------------------------------------------------------------------------------------------------------------------------------------------------------------------------------------------------------------------------------------------------------------------------------------------------------------------------------------------------------------------------------------------------------------------------------------------------------------------------------------------------------------------------------------------------------------------------------------------------------------------------------------------------------------------------------------------------------------------------------------------------------------------------------------------------------------------------------------------------------------------------------------------------------------------------------------------------------------------------------------------------------------------------------------------------------------------------------------|
| <b>Glycolysis / Gluconeogenesis</b> | map00010 | 21 | ec:4.1.2.13<br>aldolase,<br>ec:4.1.1.49<br>carboxykinase<br>(ATP),<br>ec:4.1.1.32<br>carboxykinase<br>(GTP),<br>ec:2.7.1.40<br>kinase,<br>ec:2.7.1.2<br>glucokinase<br>(phosphorylatin<br>g), ec:2.7.1.1<br>hexokinase type<br>IV glucokinase,<br>ec:1.2.1.59<br>dehydrogenase<br>(NAD(P)+)<br>(phosphorylatin<br>g), ec:4.1.1.1<br>decarboxylase,<br>ec:6.2.1.1<br>ligase,<br>ec:5.1.3.3<br>1epimerase,<br>ec:2.3.1.12<br>acetyltransferas<br>e, ec:3.1.3.11<br>hexose<br>diphosphatase,<br>ec:1.2.1.12<br>dehydrogenase<br>(phosphorylatin<br>g), ec:1.8.1.4<br>dehydrogenase,<br>ec:5.3.1.9<br>isomerase,<br>ec:1.1.1.2<br>dehydrogenase<br>(NADP+),<br>ec:1.1.1.1<br>dehydrogenase,<br>ec:4.2.1.11<br>hydratase,<br>ec:1.2.1.5<br>dehydrogenase<br>[NAD(P)+],<br>ec:1.2.1.3<br>dehydrogenase<br>(NAD+),<br>ec:1.2.4.1<br>dehydrogenase<br>(acetyltransferri<br>ng) | 2, 1,<br>1, 7,<br>1, 1,<br>3, 1,<br>1, 1,<br>2, 2,<br>5, 1,<br>1,<br>10,<br>5, 1,<br>1, 6,<br>2 | Sample3_Locus_324_Transcript_3/17_Confidence_0.222_Length_1711,<br>Sample6_Locus_28252_Transcript_2/3_Confidence_0.500_Length_808,<br>Sample6_Locus_11174_Transcript_1/1_Confidence_0.000_Length_1998,<br>Sample6_Locus_11174_Transcript_1/1_Confidence_0.000_Length_1998,<br>Sample6_Locus_12247_Transcript_7/9_Confidence_0.429_Length_1396,<br>SampleTS1_Locus_11723_Transcript_6/16_Confidence_0.073_Length_167<br>9,<br>SampleTS1_Locus_7761_Transcript_5/10_Confidence_0.105_Length_1358<br>,<br>SampleTS2_Locus_14711_Transcript_4/7_Confidence_0.273_Length_1393<br>,<br>Sample6_Locus_2327_Transcript_47/56_Confidence_0.195_Length_2423,<br>Sample6_Locus_22851_Transcript_2/3_Confidence_0.714_Length_1077,<br>SampleTS1_Locus_2696_Transcript_4/6_Confidence_0.545_Length_1155,<br>Sample6_Locus_5095_Transcript_5/8_Confidence_0.300_Length_1241,<br>Sample6_Locus_5095_Transcript_5/8_Confidence_0.300_Length_1241,<br>SampleTS2_Locus_819_Transcript_16/18_Confidence_0.250_Length_1000<br>,<br>SampleTS2_Locus_12618_Transcript_4/6_Confidence_0.571_Length_1272<br>, Sample6_Locus_997_Transcript_9/17_Confidence_0.200_Length_950,<br>Sample3_Locus_4596_Transcript_3/6_Confidence_0.400_Length_1157,<br>SampleTS3_Locus_456_Transcript_2/6_Confidence_0.200_Length_2075,<br>Sample3_Locus_10443_Transcript_10/11_Confidence_0.700_Length_2690<br>,<br>SampleTS2_Locus_8836_Transcript_1/2_Confidence_0.667_Length_1729,<br>SampleTS3_Locus_5316_Transcript_1/2_Confidence_0.750_Length_1843,<br>Sample3_Locus_10262_Transcript_4/5_Confidence_0.062_Length_1337,<br>Sample6_Locus_2283_Transcript_7/17_Confidence_0.225_Length_1818,<br>SampleTS2_Locus_819_Transcript_16/18_Confidence_0.250_Length_1000<br>,<br>Sample1_Locus_7420_Transcript_10/14_Confidence_0.154_Length_1346,<br>SampleTS2_Locus_12618_Transcript_4/6_Confidence_0.571_Length_1272<br>, Sample6_Locus_997_Transcript_9/17_Confidence_0.200_Length_950,<br>Sample1_Locus_393_Transcript_6/7_Confidence_0.556_Length_1466,<br>SampleTS3_Locus_4699_Transcript_6/10_Confidence_0.579_Length_1963<br>,<br>SampleTS1_Locus_12696_Transcript_3/3_Confidence_0.000_Length_1743<br>, Sample6_Locus_15547_Transcript_5/8_Confidence_0.545_Length_1332,<br>Sample6_Locus_7369_Transcript_3/6_Confidence_0.200_Length_1828,<br>SampleTS1_Locus_2734_Transcript_1/3_Confidence_0.333_Length_2491,<br>SampleTS2_Locus_15764_Transcript_1/1_Confidence_0.000_Length_1068<br>, Sample3_Locus_27117_Transcript_1/3_Confidence_0.250_Length_685,<br>Sample6_Locus_6954_Transcript_4/5_Confidence_0.500_Length_1201,<br>Sample6_Locus_4129_Transcript_8/27_Confidence_0.107_Length_571,<br>SampleTS3_Locus_8149_Transcript_4/10_Confidence_0.118_Length_927,<br>SampleTS1_Locus_6731_Transcript_14/15_Confidence_0.246_Length_230<br>3,<br>SampleTS1_Locus_10087_Transcript_6/7_Confidence_0.167_Length_948,<br>SampleTS2_Locus_4874_Transcript_6/12_Confidence_0.158_Length_1042<br>,<br>Sample6_Locus_1524_Transcript_26/30_Confidence_0.185_Length_3215,<br>SampleTS2_Locus_263_Transcript_1/3_Confidence_0.250_Length_2184,<br>SampleTS3_Locus_400_Transcript_6/29_Confidence_0.422_Length_2479,<br>SampleTS3_Locus_23264_Transcript_1/3_Confidence_0.500_Length_845,<br>SampleTS1_Locus_3608_Transcript_5/7_Confidence_0.222_Length_1514,<br>SampleTS1_Locus_5373_Transcript_26/33_Confidence_0.065_Length_162<br>0,<br>SampleTS3_Locus_23038_Transcript_2/3_Confidence_0.333_Length_1864<br>,<br>SampleTS2_Locus_4874_Transcript_6/12_Confidence_0.158_Length_1042<br>, Sample3_Locus_23176_Transcript_2/3_Confidence_0.333_Length_1282,<br>SampleTS1_Locus_5373_Transcript_26/33_Confidence_0.065_Length_162<br>0,<br>Sample6_Locus_12695_Transcript_1/2_Confidence_0.333_Length_2218,<br>SampleTS3_Locus_23264_Transcript_1/3_Confidence_0.500_Length_845,<br>Sample3_Locus_1003_Transcript_1/3_Confidence_0.750_Length_1416,<br>SampleTS2_Locus_9103_Transcript_1/2_Confidence_0.667_Length_685 |
|-------------------------------------|----------|----|------------------------------------------------------------------------------------------------------------------------------------------------------------------------------------------------------------------------------------------------------------------------------------------------------------------------------------------------------------------------------------------------------------------------------------------------------------------------------------------------------------------------------------------------------------------------------------------------------------------------------------------------------------------------------------------------------------------------------------------------------------------------------------------------------------------------------------------------------------------------|-------------------------------------------------------------------------------------------------|---------------------------------------------------------------------------------------------------------------------------------------------------------------------------------------------------------------------------------------------------------------------------------------------------------------------------------------------------------------------------------------------------------------------------------------------------------------------------------------------------------------------------------------------------------------------------------------------------------------------------------------------------------------------------------------------------------------------------------------------------------------------------------------------------------------------------------------------------------------------------------------------------------------------------------------------------------------------------------------------------------------------------------------------------------------------------------------------------------------------------------------------------------------------------------------------------------------------------------------------------------------------------------------------------------------------------------------------------------------------------------------------------------------------------------------------------------------------------------------------------------------------------------------------------------------------------------------------------------------------------------------------------------------------------------------------------------------------------------------------------------------------------------------------------------------------------------------------------------------------------------------------------------------------------------------------------------------------------------------------------------------------------------------------------------------------------------------------------------------------------------------------------------------------------------------------------------------------------------------------------------------------------------------------------------------------------------------------------------------------------------------------------------------------------------------------------------------------------------------------------------------------------------------------------------------------------------------------------------------------------------------------------------------------------------------------------------------------------------------------------------------------------------------------------------------------------------------------------------------------------------------------------------------------------------------------------------------------------------------------------------------------------------------------------------------------------------------------------------------------------------------------------------------------------------------------------------------------------------------------------------------------------------------------------------------------------------------------------------------------------------------------------------------------------------------------------------------------------------------------------------------------------------------------------------------------------------------------------------------------------------------------------------------------------------------------------------------------------------------------------------------------------------------------------------------------------------------------------------------------------------------------------------------------------------------------------------------------------------|

|                                      |          |    |                                                                                                                                                                                                                                                                                                                                                                                                                                                                                                                                                                                                                                                                                       |                                                      |                                                                                                                                                                                                                                                                                                                                                                                                                                                                                                                                                                                                                                                                                                                                                                                                                                                                                                                                                                                                                                                                                                                                                                                                                                                                                                                                                                                                                                                                                                                                                                                                                                                                                                                                                                                                                                                                                                                                                                                                                                                                                                                                                                                                                                                                                                                                                                                                                                                                                                                                                                                                                                                                                                                                                                                                                                                                                                        |
|--------------------------------------|----------|----|---------------------------------------------------------------------------------------------------------------------------------------------------------------------------------------------------------------------------------------------------------------------------------------------------------------------------------------------------------------------------------------------------------------------------------------------------------------------------------------------------------------------------------------------------------------------------------------------------------------------------------------------------------------------------------------|------------------------------------------------------|--------------------------------------------------------------------------------------------------------------------------------------------------------------------------------------------------------------------------------------------------------------------------------------------------------------------------------------------------------------------------------------------------------------------------------------------------------------------------------------------------------------------------------------------------------------------------------------------------------------------------------------------------------------------------------------------------------------------------------------------------------------------------------------------------------------------------------------------------------------------------------------------------------------------------------------------------------------------------------------------------------------------------------------------------------------------------------------------------------------------------------------------------------------------------------------------------------------------------------------------------------------------------------------------------------------------------------------------------------------------------------------------------------------------------------------------------------------------------------------------------------------------------------------------------------------------------------------------------------------------------------------------------------------------------------------------------------------------------------------------------------------------------------------------------------------------------------------------------------------------------------------------------------------------------------------------------------------------------------------------------------------------------------------------------------------------------------------------------------------------------------------------------------------------------------------------------------------------------------------------------------------------------------------------------------------------------------------------------------------------------------------------------------------------------------------------------------------------------------------------------------------------------------------------------------------------------------------------------------------------------------------------------------------------------------------------------------------------------------------------------------------------------------------------------------------------------------------------------------------------------------------------------------|
| <b>Starch and sucrose metabolism</b> | map00500 | 21 | ec:3.6.1.9 diphosphatase, ec:2.7.1.2 glucokinase (phosphorylating), ec:2.7.1.1 hexokinase type IV glucokinase, ec:2.7.1.4 fructokinase (phosphorylating), ec:3.1.2.21 hydrolase, ec:3.1.3.12 trehalose 6-phosphatase, ec:3.6.1.21 diphosphatase, ec:2.7.7.9 uridylyltransferase, ec:3.2.1.2 saccharogen amylase, ec:3.2.1.1 glycogenase, ec:3.2.1.68 debranching enzyme, ec:5.3.1.9 isomerase, ec:3.2.1.58 1,3beta-glucosidase, ec:2.7.7.27 adenylyltransferase, ec:3.2.1.21 gentiobiase, ec:2.4.1.1 phosphorylase, ec:2.4.1.18 branching enzyme, ec:2.4.1.15 synthase (UDP-forming), ec:2.4.1.14 synthase, ec:2.4.1.12 synthase (UDP-forming), ec:2.4.1.25 disproportionating enzyme | 5, 1, 1, 1, 2, 4, 5, 2, 4, 1, 1, 1, 1, 2, 2, 1, 1, 1 | Sample6_Locus_1849_Transcript_4/6_Confidence_0.429_Length_866, Sample3_Locus_345_Transcript_6/8_Confidence_0.455_Length_1801, SampleTS3_Locus_5573_Transcript_4/5_Confidence_0.333_Length_940, Sample3_Locus_10699_Transcript_3/4_Confidence_0.400_Length_957, Sample3_Locus_27182_Transcript_2/3_Confidence_0.250_Length_1010, Sample6_Locus_5095_Transcript_5/8_Confidence_0.300_Length_1241, Sample6_Locus_5095_Transcript_5/8_Confidence_0.300_Length_1241, Sample6_Locus_5095_Transcript_5/8_Confidence_0.300_Length_1241, Sample6_Locus_10875_Transcript_2/10_Confidence_0.167_Length_1095, SampleTS3_Locus_6160_Transcript_3/3_Confidence_0.167_Length_2057, Sample6_Locus_6071_Transcript_1/2_Confidence_0.333_Length_2182, Sample3_Locus_345_Transcript_6/8_Confidence_0.455_Length_1801, SampleTS2_Locus_5310_Transcript_3/15_Confidence_0.167_Length_1115, Sample3_Locus_734_Transcript_8/12_Confidence_0.176_Length_1222, SampleTS3_Locus_5794_Transcript_5/6_Confidence_0.125_Length_1722, SampleTS3_Locus_2330_Transcript_4/4_Confidence_0.000_Length_1686, SampleTS1_Locus_16292_Transcript_4/5_Confidence_0.600_Length_1341, Sample3_Locus_4208_Transcript_8/15_Confidence_0.091_Length_2117, Sample3_Locus_40_Transcript_1/1_Confidence_0.000_Length_1702, Sample3_Locus_14770_Transcript_1/1_Confidence_0.000_Length_1819, Sample3_Locus_2003_Transcript_3/7_Confidence_0.300_Length_1588, Sample1_Locus_23952_Transcript_4/4_Confidence_0.167_Length_1585, SampleTS3_Locus_2836_Transcript_6/9_Confidence_0.091_Length_1339, SampleTS2_Locus_11527_Transcript_3/7_Confidence_0.625_Length_1438, SampleTS1_Locus_833_Transcript_7/9_Confidence_0.300_Length_1571, SampleTS3_Locus_119_Transcript_5/13_Confidence_0.087_Length_2030, SampleTS3_Locus_2836_Transcript_6/9_Confidence_0.091_Length_1339, SampleTS1_Locus_12696_Transcript_3/3_Confidence_0.000_Length_1743, SampleTS2_Locus_9286_Transcript_1/1_Confidence_0.000_Length_2119, Sample3_Locus_6692_Transcript_2/3_Confidence_0.333_Length_1421, Sample1_Locus_25240_Transcript_4/4_Confidence_0.429_Length_2225, SampleTS2_Locus_9286_Transcript_1/1_Confidence_0.000_Length_2119, Sample3_Locus_982_Transcript_1/1_Confidence_0.000_Length_2070, SampleTS3_Locus_4468_Transcript_6/7_Confidence_0.125_Length_3339, SampleTS3_Locus_4468_Transcript_2/7_Confidence_0.250_Length_1403, SampleTS2_Locus_652_Transcript_7/8_Confidence_0.417_Length_1591, Sample1_Locus_1836_Transcript_6/7_Confidence_0.364_Length_3038, Sample1_Locus_1040_Transcript_6/8_Confidence_0.333_Length_2600, SampleTS3_Locus_6160_Transcript_3/3_Confidence_0.167_Length_2057, Sample6_Locus_6071_Transcript_1/2_Confidence_0.333_Length_2182, Sample6_Locus_836_Transcript_8/21_Confidence_0.226_Length_3574, SampleTS1_Locus_24714_Transcript_1/1_Confidence_0.000_Length_794, Sample6_Locus_6420_Transcript_1/2_Confidence_0.333_Length_2262 |
|--------------------------------------|----------|----|---------------------------------------------------------------------------------------------------------------------------------------------------------------------------------------------------------------------------------------------------------------------------------------------------------------------------------------------------------------------------------------------------------------------------------------------------------------------------------------------------------------------------------------------------------------------------------------------------------------------------------------------------------------------------------------|------------------------------------------------------|--------------------------------------------------------------------------------------------------------------------------------------------------------------------------------------------------------------------------------------------------------------------------------------------------------------------------------------------------------------------------------------------------------------------------------------------------------------------------------------------------------------------------------------------------------------------------------------------------------------------------------------------------------------------------------------------------------------------------------------------------------------------------------------------------------------------------------------------------------------------------------------------------------------------------------------------------------------------------------------------------------------------------------------------------------------------------------------------------------------------------------------------------------------------------------------------------------------------------------------------------------------------------------------------------------------------------------------------------------------------------------------------------------------------------------------------------------------------------------------------------------------------------------------------------------------------------------------------------------------------------------------------------------------------------------------------------------------------------------------------------------------------------------------------------------------------------------------------------------------------------------------------------------------------------------------------------------------------------------------------------------------------------------------------------------------------------------------------------------------------------------------------------------------------------------------------------------------------------------------------------------------------------------------------------------------------------------------------------------------------------------------------------------------------------------------------------------------------------------------------------------------------------------------------------------------------------------------------------------------------------------------------------------------------------------------------------------------------------------------------------------------------------------------------------------------------------------------------------------------------------------------------------------|

|                                                           |                 |           |                                                                                                                                                                                                                                                                                                                                                                                                                                                                                                                                                                                                                                                                                                                                                                                                                                                                                      |                                                                                                              |                                                                                                                                                                                                                                                                                                                                                                                                                                                                                                                                                                                                                                                                                                                                                                                                                                                                                                                                                                                                                                                                                                                                                                                                                                                                                                                                                                                                                                                                                                                                                                                                                                                                                                                                                                                                                                                                                                                                                                                                                                                                                                                                                                                                                                                                                                                                                                                                                                                                                                                                                                                                                                                                                                                                                                           |
|-----------------------------------------------------------|-----------------|-----------|--------------------------------------------------------------------------------------------------------------------------------------------------------------------------------------------------------------------------------------------------------------------------------------------------------------------------------------------------------------------------------------------------------------------------------------------------------------------------------------------------------------------------------------------------------------------------------------------------------------------------------------------------------------------------------------------------------------------------------------------------------------------------------------------------------------------------------------------------------------------------------------|--------------------------------------------------------------------------------------------------------------|---------------------------------------------------------------------------------------------------------------------------------------------------------------------------------------------------------------------------------------------------------------------------------------------------------------------------------------------------------------------------------------------------------------------------------------------------------------------------------------------------------------------------------------------------------------------------------------------------------------------------------------------------------------------------------------------------------------------------------------------------------------------------------------------------------------------------------------------------------------------------------------------------------------------------------------------------------------------------------------------------------------------------------------------------------------------------------------------------------------------------------------------------------------------------------------------------------------------------------------------------------------------------------------------------------------------------------------------------------------------------------------------------------------------------------------------------------------------------------------------------------------------------------------------------------------------------------------------------------------------------------------------------------------------------------------------------------------------------------------------------------------------------------------------------------------------------------------------------------------------------------------------------------------------------------------------------------------------------------------------------------------------------------------------------------------------------------------------------------------------------------------------------------------------------------------------------------------------------------------------------------------------------------------------------------------------------------------------------------------------------------------------------------------------------------------------------------------------------------------------------------------------------------------------------------------------------------------------------------------------------------------------------------------------------------------------------------------------------------------------------------------------------|
| <p><b>Alanine, aspartate and glutamate metabolism</b></p> | <p>map00250</p> | <p>21</p> | <p>ec:2.6.1.12<br/>transaminase,<br/>ec:2.6.1.15<br/>transaminase,<br/>ec:2.6.1.16<br/>transaminase<br/>(isomerizing),<br/>ec:2.6.1.19<br/>transaminase,<br/>ec:6.3.4.4<br/>synthase,<br/>ec:1.4.3.2<br/>oxidase,<br/>ec:6.3.1.1<br/>ligase,<br/>ec:6.3.1.2<br/>synthetase,<br/>ec:2.1.3.2<br/>carbamoyltrans<br/>ferase,<br/>ec:2.6.1.44<br/>transaminase,<br/>ec:4.1.1.15<br/>decarboxylase,<br/>ec:6.3.4.16<br/>synthase<br/>(ammonia),<br/>ec:1.4.3.16<br/>oxidase,<br/>ec:2.6.1.2<br/>transaminase,<br/>ec:2.6.1.1<br/>transaminase,<br/>ec:1.4.1.14<br/>synthase<br/>(NADH),<br/>ec:6.3.5.4<br/>synthase<br/>(glutaminehydr<br/>olysing),<br/>ec:6.3.5.5<br/>synthase<br/>(glutaminehydr<br/>olysing),<br/>ec:2.4.2.14<br/>phosphoribosyl<br/>diphosphate<br/>5amidotransfer<br/>ase, ec:3.5.1.2<br/>glutaminase I,<br/>ec:3.5.1.3<br/>alphaketo<br/>acidomegaamid<br/>ase</p> | <p>3, 1,<br/>1, 1,<br/>1, 1,<br/>2, 2,<br/>1, 6,<br/>1, 1,<br/>1, 3,<br/>3, 2,<br/>2, 2,<br/>1, 2,<br/>1</p> | <p>Sample6_Locus_2195_Transcript_14/16_Confidence_0.176_Length_1741,<br/>SampleTS3_Locus_714_Transcript_7/14_Confidence_0.087_Length_1194,<br/>Sample1_Locus_19449_Transcript_1/1_Confidence_0.000_Length_1704,<br/>Sample6_Locus_22798_Transcript_3/3_Confidence_0.250_Length_666,<br/>Sample6_Locus_5350_Transcript_7/9_Confidence_0.333_Length_2351,<br/>SampleTS1_Locus_13173_Transcript_7/8_Confidence_0.190_Length_747,<br/>Sample3_Locus_13585_Transcript_1/1_Confidence_0.000_Length_1351,<br/>SampleTS1_Locus_1041_Transcript_1/5_Confidence_0.400_Length_2190,<br/>Sample6_Locus_5745_Transcript_6/10_Confidence_0.065_Length_1149,<br/>Sample6_Locus_7334_Transcript_8/13_Confidence_0.571_Length_1873,<br/>Sample1_Locus_3256_Transcript_2/10_Confidence_0.182_Length_1415,<br/>SampleTS2_Locus_4400_Transcript_6/7_Confidence_0.333_Length_1376,<br/>Sample1_Locus_3772_Transcript_1/3_Confidence_0.333_Length_1976,<br/>Sample6_Locus_2195_Transcript_14/16_Confidence_0.176_Length_1741,<br/>SampleTS3_Locus_714_Transcript_7/14_Confidence_0.087_Length_1194,<br/>Sample3_Locus_1833_Transcript_4/6_Confidence_0.500_Length_1265,<br/>SampleTS1_Locus_13173_Transcript_7/8_Confidence_0.190_Length_747,<br/>Sample1_Locus_19449_Transcript_1/1_Confidence_0.000_Length_1704,<br/>Sample6_Locus_15604_Transcript_2/4_Confidence_0.400_Length_1416,<br/>SampleTS3_Locus_5084_Transcript_15/17_Confidence_0.206_Length_175<br/>1,<br/>SampleTS3_Locus_15776_Transcript_1/2_Confidence_0.333_Length_1102<br/>,<br/>SampleTS1_Locus_1041_Transcript_1/5_Confidence_0.400_Length_2190,<br/>Sample6_Locus_2195_Transcript_14/16_Confidence_0.176_Length_1741,<br/>SampleTS3_Locus_714_Transcript_7/14_Confidence_0.087_Length_1194,<br/>Sample1_Locus_19449_Transcript_1/1_Confidence_0.000_Length_1704,<br/>Sample1_Locus_26802_Transcript_1/2_Confidence_0.667_Length_439,<br/>Sample6_Locus_13664_Transcript_1/2_Confidence_0.333_Length_862,<br/>SampleTS2_Locus_6646_Transcript_2/2_Confidence_0.333_Length_1520,<br/>SampleTS3_Locus_21707_Transcript_1/2_Confidence_0.333_Length_2460<br/>,<br/>SampleTS1_Locus_1310_Transcript_14/17_Confidence_0.222_Length_190<br/>1,<br/>Sample6_Locus_5745_Transcript_6/10_Confidence_0.065_Length_1149,<br/>Sample6_Locus_7334_Transcript_8/13_Confidence_0.571_Length_1873,<br/>SampleTS2_Locus_5848_Transcript_1/1_Confidence_0.000_Length_1345,<br/>SampleTS3_Locus_15776_Transcript_1/2_Confidence_0.333_Length_1102<br/>, Sample3_Locus_10439_Transcript_3/6_Confidence_0.667_Length_1846,<br/>Sample6_Locus_3307_Transcript_18/23_Confidence_0.163_Length_735,<br/>SampleTS1_Locus_5169_Transcript_10/19_Confidence_0.593_Length_316<br/>2, Sample6_Locus_1849_Transcript_4/6_Confidence_0.429_Length_866</p> |
|-----------------------------------------------------------|-----------------|-----------|--------------------------------------------------------------------------------------------------------------------------------------------------------------------------------------------------------------------------------------------------------------------------------------------------------------------------------------------------------------------------------------------------------------------------------------------------------------------------------------------------------------------------------------------------------------------------------------------------------------------------------------------------------------------------------------------------------------------------------------------------------------------------------------------------------------------------------------------------------------------------------------|--------------------------------------------------------------------------------------------------------------|---------------------------------------------------------------------------------------------------------------------------------------------------------------------------------------------------------------------------------------------------------------------------------------------------------------------------------------------------------------------------------------------------------------------------------------------------------------------------------------------------------------------------------------------------------------------------------------------------------------------------------------------------------------------------------------------------------------------------------------------------------------------------------------------------------------------------------------------------------------------------------------------------------------------------------------------------------------------------------------------------------------------------------------------------------------------------------------------------------------------------------------------------------------------------------------------------------------------------------------------------------------------------------------------------------------------------------------------------------------------------------------------------------------------------------------------------------------------------------------------------------------------------------------------------------------------------------------------------------------------------------------------------------------------------------------------------------------------------------------------------------------------------------------------------------------------------------------------------------------------------------------------------------------------------------------------------------------------------------------------------------------------------------------------------------------------------------------------------------------------------------------------------------------------------------------------------------------------------------------------------------------------------------------------------------------------------------------------------------------------------------------------------------------------------------------------------------------------------------------------------------------------------------------------------------------------------------------------------------------------------------------------------------------------------------------------------------------------------------------------------------------------------|

|                                           |          |    |                                                                                                                                                                                                                                                                                                                                                                                                                                                                                                                                                                                                                       |                                                                                       |                                                                                                                                                                                                                                                                                                                                                                                                                                                                                                                                                                                                                                                                                                                                                                                                                                                                                                                                                                                                                                                                                                                                                                                                                                                                                                                                                                                                                                                                                                                                                                                                                                                                                                                                                                                                                                                                                                                                                                                                                                                                                                                                                                                                                                                                                                                                                                                                                                                                                                                                                    |
|-------------------------------------------|----------|----|-----------------------------------------------------------------------------------------------------------------------------------------------------------------------------------------------------------------------------------------------------------------------------------------------------------------------------------------------------------------------------------------------------------------------------------------------------------------------------------------------------------------------------------------------------------------------------------------------------------------------|---------------------------------------------------------------------------------------|----------------------------------------------------------------------------------------------------------------------------------------------------------------------------------------------------------------------------------------------------------------------------------------------------------------------------------------------------------------------------------------------------------------------------------------------------------------------------------------------------------------------------------------------------------------------------------------------------------------------------------------------------------------------------------------------------------------------------------------------------------------------------------------------------------------------------------------------------------------------------------------------------------------------------------------------------------------------------------------------------------------------------------------------------------------------------------------------------------------------------------------------------------------------------------------------------------------------------------------------------------------------------------------------------------------------------------------------------------------------------------------------------------------------------------------------------------------------------------------------------------------------------------------------------------------------------------------------------------------------------------------------------------------------------------------------------------------------------------------------------------------------------------------------------------------------------------------------------------------------------------------------------------------------------------------------------------------------------------------------------------------------------------------------------------------------------------------------------------------------------------------------------------------------------------------------------------------------------------------------------------------------------------------------------------------------------------------------------------------------------------------------------------------------------------------------------------------------------------------------------------------------------------------------------|
| <b>Cysteine and methionine metabolism</b> | map00270 | 20 | ec:4.1.1.50 decarboxylase,<br>ec:4.4.1.15 desulfhydrase,<br>ec:4.4.1.14 synthase,<br>ec:1.4.3.2 oxidase,<br>ec:2.6.1.57 transaminase,<br>ec:2.7.2.4 kinase,<br>ec:2.6.1.42 transaminase,<br>ec:2.6.1.44 transaminase,<br>ec:1.13.11.54 dioxygenase [iron(II)requir in g],<br>ec:2.3.1.30 Oacetyltransfer ase,<br>ec:1.8.4.13 (S)Soxide reductase,<br>ec:3.5.99.7 deaminase,<br>ec:2.1.1.13 synthase,<br>ec:2.6.1.5 transaminase,<br>ec:3.3.1.1 Sadenosylhomo cysteine synthase,<br>ec:2.5.1.47 synthase,<br>ec:2.6.1.1 transaminase,<br>ec:1.1.1.37 dehydrogenase,<br>ec:4.4.1.1 gammalyase,<br>ec:5.3.1.23 isomerase | 1, 1,<br>1, 1,<br>2, 1,<br>2, 6,<br>2, 1,<br>2, 1,<br>1, 2,<br>2, 3,<br>3, 1,<br>2, 1 | SampleTS1_Locus_23304_Transcript_2/3_Confidence_0.333_Length_2324<br>,<br>SampleTS2_Locus_6805_Transcript_3/5_Confidence_0.429_Length_1160,<br>SampleTS2_Locus_10700_Transcript_2/5_Confidence_0.400_Length_1240<br>,<br>SampleTS1_Locus_1041_Transcript_1/5_Confidence_0.400_Length_2190,<br>Sample1_Locus_26802_Transcript_1/2_Confidence_0.667_Length_439,<br>Sample6_Locus_13664_Transcript_1/2_Confidence_0.333_Length_862,<br>Sample3_Locus_2031_Transcript_1/1_Confidence_0.000_Length_2262,<br>Sample1_Locus_18777_Transcript_2/4_Confidence_0.923_Length_1416,<br>Sample3_Locus_5952_Transcript_4/4_Confidence_0.000_Length_2586,<br>Sample6_Locus_2195_Transcript_14/16_Confidence_0.176_Length_1741,<br>SampleTS3_Locus_714_Transcript_7/14_Confidence_0.087_Length_1194,<br>Sample3_Locus_1833_Transcript_4/6_Confidence_0.500_Length_1265,<br>SampleTS1_Locus_13173_Transcript_7/8_Confidence_0.190_Length_747,<br>Sample1_Locus_19449_Transcript_1/1_Confidence_0.000_Length_1704,<br>Sample6_Locus_15604_Transcript_2/4_Confidence_0.400_Length_1416,<br>Sample3_Locus_25024_Transcript_2/3_Confidence_0.400_Length_705,<br>Sample3_Locus_13790_Transcript_1/1_Confidence_0.000_Length_969,<br>Sample3_Locus_6377_Transcript_4/4_Confidence_0.125_Length_1830,<br>SampleTS3_Locus_3182_Transcript_3/5_Confidence_0.400_Length_494,<br>SampleTS1_Locus_1262_Transcript_63/105_Confidence_0.008_Length_707,<br>SampleTS2_Locus_6805_Transcript_3/5_Confidence_0.429_Length_1160,<br>SampleTS1_Locus_8020_Transcript_2/4_Confidence_0.333_Length_2411,<br>Sample1_Locus_26802_Transcript_1/2_Confidence_0.667_Length_439,<br>Sample6_Locus_13664_Transcript_1/2_Confidence_0.333_Length_862,<br>Sample1_Locus_1471_Transcript_7/9_Confidence_0.333_Length_1784,<br>Sample6_Locus_23233_Transcript_1/1_Confidence_0.000_Length_2733,<br>Sample1_Locus_15681_Transcript_1/1_Confidence_0.000_Length_1030,<br>Sample6_Locus_5355_Transcript_5/8_Confidence_0.577_Length_1830,<br>SampleTS2_Locus_2923_Transcript_3/4_Confidence_0.333_Length_1277,<br>Sample1_Locus_26802_Transcript_1/2_Confidence_0.667_Length_439,<br>Sample6_Locus_13664_Transcript_1/2_Confidence_0.333_Length_862,<br>SampleTS2_Locus_6646_Transcript_2/2_Confidence_0.333_Length_1520,<br>Sample6_Locus_293_Transcript_1/2_Confidence_0.333_Length_875,<br>Sample6_Locus_5355_Transcript_5/8_Confidence_0.577_Length_1830,<br>SampleTS2_Locus_2923_Transcript_3/4_Confidence_0.333_Length_1277,<br>Sample1_Locus_12270_Transcript_7/8_Confidence_0.133_Length_2318 |
|-------------------------------------------|----------|----|-----------------------------------------------------------------------------------------------------------------------------------------------------------------------------------------------------------------------------------------------------------------------------------------------------------------------------------------------------------------------------------------------------------------------------------------------------------------------------------------------------------------------------------------------------------------------------------------------------------------------|---------------------------------------------------------------------------------------|----------------------------------------------------------------------------------------------------------------------------------------------------------------------------------------------------------------------------------------------------------------------------------------------------------------------------------------------------------------------------------------------------------------------------------------------------------------------------------------------------------------------------------------------------------------------------------------------------------------------------------------------------------------------------------------------------------------------------------------------------------------------------------------------------------------------------------------------------------------------------------------------------------------------------------------------------------------------------------------------------------------------------------------------------------------------------------------------------------------------------------------------------------------------------------------------------------------------------------------------------------------------------------------------------------------------------------------------------------------------------------------------------------------------------------------------------------------------------------------------------------------------------------------------------------------------------------------------------------------------------------------------------------------------------------------------------------------------------------------------------------------------------------------------------------------------------------------------------------------------------------------------------------------------------------------------------------------------------------------------------------------------------------------------------------------------------------------------------------------------------------------------------------------------------------------------------------------------------------------------------------------------------------------------------------------------------------------------------------------------------------------------------------------------------------------------------------------------------------------------------------------------------------------------------|



|                                                        |                 |           |                                                                                                                                                                                                                                                                                                                                                                                                                                                                                                   |                                                                |                                                                                                                                                                                                                                                                                                                                                                                                                                                                                                                                                                                                                                                                                                                                                                                                                                                                                                                                                                                                                                                                                                                                                                                                                                                                                                                                                                                                                                                                                                                                                                                                                                                                                                                                                                                                                                                                                                                                                                                                                                                                                                                                                                                                                                                                                                                                                                                                                                                                                                                                                                                                   |
|--------------------------------------------------------|-----------------|-----------|---------------------------------------------------------------------------------------------------------------------------------------------------------------------------------------------------------------------------------------------------------------------------------------------------------------------------------------------------------------------------------------------------------------------------------------------------------------------------------------------------|----------------------------------------------------------------|---------------------------------------------------------------------------------------------------------------------------------------------------------------------------------------------------------------------------------------------------------------------------------------------------------------------------------------------------------------------------------------------------------------------------------------------------------------------------------------------------------------------------------------------------------------------------------------------------------------------------------------------------------------------------------------------------------------------------------------------------------------------------------------------------------------------------------------------------------------------------------------------------------------------------------------------------------------------------------------------------------------------------------------------------------------------------------------------------------------------------------------------------------------------------------------------------------------------------------------------------------------------------------------------------------------------------------------------------------------------------------------------------------------------------------------------------------------------------------------------------------------------------------------------------------------------------------------------------------------------------------------------------------------------------------------------------------------------------------------------------------------------------------------------------------------------------------------------------------------------------------------------------------------------------------------------------------------------------------------------------------------------------------------------------------------------------------------------------------------------------------------------------------------------------------------------------------------------------------------------------------------------------------------------------------------------------------------------------------------------------------------------------------------------------------------------------------------------------------------------------------------------------------------------------------------------------------------------------|
| <p><b>Glycine, serine and threonine metabolism</b></p> | <p>map00260</p> | <p>19</p> | <p>ec:2.1.2.1 hydroxymethyltransferase, ec:2.6.1.51 transaminase, ec:2.6.1.52 transaminase, ec:2.7.2.4 kinase, ec:2.7.1.39 kinase, ec:4.2.3.1 synthase, ec:2.6.1.44 transaminase, ec:2.6.1.45 transaminase, ec:1.1.1.103 3dehydrogenase, ec:4.1.2.5 aldolase, ec:2.3.1.29 Cacetyltransferase, ec:1.8.1.4 dehydrogenase, ec:3.1.3.3 phosphatase, ec:1.1.1.1 dehydrogenase, ec:4.2.1.20 synthase, ec:2.6.1.4 transaminase, ec:1.2.1.8 dehydrogenase, ec:4.4.1.1 gammalyase, ec:1.4.3.21 oxidase</p> | <p>2, 1, 1, 1, 1, 2, 6, 1, 3, 2, 1, 1, 1, 5, 3, 3, 1, 2, 1</p> | <p>Sample1_Locus_3932_Transcript_7/11_Confidence_0.400_Length_1725, SampleTS1_Locus_10618_Transcript_3/4_Confidence_0.400_Length_1517, Sample6_Locus_15604_Transcript_2/4_Confidence_0.400_Length_1416, Sample1_Locus_9264_Transcript_1/1_Confidence_0.000_Length_1678, Sample3_Locus_2031_Transcript_1/1_Confidence_0.000_Length_2262, Sample3_Locus_10043_Transcript_1/1_Confidence_0.000_Length_1378, Sample6_Locus_4215_Transcript_12/29_Confidence_0.125_Length_1509, Sample6_Locus_4215_Transcript_14/29_Confidence_0.069_Length_739, Sample6_Locus_2195_Transcript_14/16_Confidence_0.176_Length_1741, SampleTS3_Locus_714_Transcript_7/14_Confidence_0.087_Length_1194, Sample3_Locus_1833_Transcript_4/6_Confidence_0.500_Length_1265, SampleTS1_Locus_13173_Transcript_7/8_Confidence_0.190_Length_747, Sample1_Locus_19449_Transcript_1/1_Confidence_0.000_Length_1704, Sample6_Locus_15604_Transcript_2/4_Confidence_0.400_Length_1416, Sample6_Locus_15604_Transcript_2/4_Confidence_0.400_Length_1416, SampleTS2_Locus_263_Transcript_1/3_Confidence_0.250_Length_2184, SampleTS3_Locus_400_Transcript_6/29_Confidence_0.422_Length_2479, SampleTS1_Locus_4882_Transcript_3/9_Confidence_0.550_Length_1118, Sample6_Locus_6563_Transcript_4/10_Confidence_0.455_Length_1416, SampleTS1_Locus_10618_Transcript_3/4_Confidence_0.400_Length_1517, SampleTS2_Locus_13131_Transcript_7/10_Confidence_0.083_Length_1731, SampleTS3_Locus_4699_Transcript_6/10_Confidence_0.579_Length_1963, Sample1_Locus_18291_Transcript_1/1_Confidence_0.000_Length_647, SampleTS2_Locus_4874_Transcript_6/12_Confidence_0.158_Length_1042, Sample6_Locus_1524_Transcript_26/30_Confidence_0.185_Length_3215, SampleTS2_Locus_263_Transcript_1/3_Confidence_0.250_Length_2184, SampleTS3_Locus_400_Transcript_6/29_Confidence_0.422_Length_2479, SampleTS3_Locus_23264_Transcript_1/3_Confidence_0.500_Length_845, SampleTS3_Locus_9447_Transcript_3/3_Confidence_0.000_Length_886, Sample6_Locus_6882_Transcript_6/8_Confidence_0.429_Length_1475, SampleTS1_Locus_10894_Transcript_1/1_Confidence_0.000_Length_652, Sample6_Locus_2195_Transcript_14/16_Confidence_0.176_Length_1741, SampleTS3_Locus_714_Transcript_7/14_Confidence_0.087_Length_1194, Sample1_Locus_19449_Transcript_1/1_Confidence_0.000_Length_1704, SampleTS1_Locus_5373_Transcript_26/33_Confidence_0.065_Length_1620, Sample6_Locus_5355_Transcript_5/8_Confidence_0.577_Length_1830, SampleTS2_Locus_2923_Transcript_3/4_Confidence_0.333_Length_1277, Sample1_Locus_4359_Transcript_11/14_Confidence_0.314_Length_2540</p> |
|--------------------------------------------------------|-----------------|-----------|---------------------------------------------------------------------------------------------------------------------------------------------------------------------------------------------------------------------------------------------------------------------------------------------------------------------------------------------------------------------------------------------------------------------------------------------------------------------------------------------------|----------------------------------------------------------------|---------------------------------------------------------------------------------------------------------------------------------------------------------------------------------------------------------------------------------------------------------------------------------------------------------------------------------------------------------------------------------------------------------------------------------------------------------------------------------------------------------------------------------------------------------------------------------------------------------------------------------------------------------------------------------------------------------------------------------------------------------------------------------------------------------------------------------------------------------------------------------------------------------------------------------------------------------------------------------------------------------------------------------------------------------------------------------------------------------------------------------------------------------------------------------------------------------------------------------------------------------------------------------------------------------------------------------------------------------------------------------------------------------------------------------------------------------------------------------------------------------------------------------------------------------------------------------------------------------------------------------------------------------------------------------------------------------------------------------------------------------------------------------------------------------------------------------------------------------------------------------------------------------------------------------------------------------------------------------------------------------------------------------------------------------------------------------------------------------------------------------------------------------------------------------------------------------------------------------------------------------------------------------------------------------------------------------------------------------------------------------------------------------------------------------------------------------------------------------------------------------------------------------------------------------------------------------------------------|



|                              |          |    |                                                                                                                                                                                                                                                                                                                                                                                                                                                                                                                                                                                              |                                                                                     |                                                                                                                                                                                                                                                                                                                                                                                                                                                                                                                                                                                                                                                                                                                                                                                                                                                                                                                                                                                                                                                                                                                                                                                                                                                                                                                                                                                                                                                                                                                                                                                                                                                                                                                                                                                                                                                                                                                                                                                                                                                                                                                                                                                                                                                                                                                                                                                                                                                                                                                                                                                                                                                                                                                                                                                                                                                                                                                                                                                                                                                                                                                                                                                                                                                                                                                                                                                                                                                                                                                                                                                                                                                                                                              |
|------------------------------|----------|----|----------------------------------------------------------------------------------------------------------------------------------------------------------------------------------------------------------------------------------------------------------------------------------------------------------------------------------------------------------------------------------------------------------------------------------------------------------------------------------------------------------------------------------------------------------------------------------------------|-------------------------------------------------------------------------------------|--------------------------------------------------------------------------------------------------------------------------------------------------------------------------------------------------------------------------------------------------------------------------------------------------------------------------------------------------------------------------------------------------------------------------------------------------------------------------------------------------------------------------------------------------------------------------------------------------------------------------------------------------------------------------------------------------------------------------------------------------------------------------------------------------------------------------------------------------------------------------------------------------------------------------------------------------------------------------------------------------------------------------------------------------------------------------------------------------------------------------------------------------------------------------------------------------------------------------------------------------------------------------------------------------------------------------------------------------------------------------------------------------------------------------------------------------------------------------------------------------------------------------------------------------------------------------------------------------------------------------------------------------------------------------------------------------------------------------------------------------------------------------------------------------------------------------------------------------------------------------------------------------------------------------------------------------------------------------------------------------------------------------------------------------------------------------------------------------------------------------------------------------------------------------------------------------------------------------------------------------------------------------------------------------------------------------------------------------------------------------------------------------------------------------------------------------------------------------------------------------------------------------------------------------------------------------------------------------------------------------------------------------------------------------------------------------------------------------------------------------------------------------------------------------------------------------------------------------------------------------------------------------------------------------------------------------------------------------------------------------------------------------------------------------------------------------------------------------------------------------------------------------------------------------------------------------------------------------------------------------------------------------------------------------------------------------------------------------------------------------------------------------------------------------------------------------------------------------------------------------------------------------------------------------------------------------------------------------------------------------------------------------------------------------------------------------------------|
| <b>Pyrimidine metabolism</b> | map00240 | 19 | ec:2.7.4.6 kinase,<br>ec:3.5.2.2 hydantoinase,<br>ec:2.7.4.9 kinase,<br>ec:3.6.1.6 diphosphate phosphatase,<br>ec:1.3.5.2 dehydrogenase (quinone),<br>ec:3.6.1.9 diphosphatase,<br>ec:4.1.1.23 decarboxylase,<br>ec:2.7.1.48 kinase,<br>ec:1.17.4.1 reductase,<br>ec:2.1.3.2 carbamoyltransferase,<br>ec:2.7.1.21 kinase,<br>ec:4.2.1.70 synthase,<br>ec:2.7.7.6 RNA polymerase,<br>ec:2.7.7.7 DNA polymerase,<br>ec:1.3.1.2 dehydrogenase (NADP+),<br>ec:6.3.5.5 synthase (glutaminehydrolysing),<br>ec:2.4.2.10 phosphoribosyltransferase,<br>ec:3.5.4.12 deaminase,<br>ec:2.7.4.14 kinase | 5, 2,<br>1, 5,<br>2, 5,<br>1, 3,<br>1, 1,<br>1, 1,<br>11,<br>6, 1,<br>2, 1,<br>1, 2 | SampleTS1_Locus_4995_Transcript_3/15_Confidence_0.395_Length_904,<br>SampleTS1_Locus_6152_Transcript_2/7_Confidence_0.375_Length_1167,<br>SampleTS1_Locus_1762_Transcript_13/36_Confidence_0.058_Length_819<br>,<br>Sample1_Locus_8568_Transcript_27/30_Confidence_0.054_Length_2057,<br>Sample1_Locus_24078_Transcript_6/7_Confidence_0.150_Length_1572,<br>SampleTS1_Locus_275_Transcript_59/85_Confidence_0.013_Length_590,<br>Sample6_Locus_10051_Transcript_2/3_Confidence_0.333_Length_1368,<br>Sample6_Locus_661_Transcript_11/15_Confidence_0.057_Length_877,<br>Sample3_Locus_345_Transcript_6/8_Confidence_0.455_Length_1801,<br>Sample6_Locus_7351_Transcript_1/1_Confidence_0.000_Length_1279,<br>SampleTS1_Locus_16626_Transcript_2/3_Confidence_0.500_Length_2047<br>,<br>SampleTS1_Locus_22896_Transcript_1/1_Confidence_0.000_Length_1681<br>, Sample3_Locus_734_Transcript_8/12_Confidence_0.176_Length_1222,<br>Sample6_Locus_6815_Transcript_6/12_Confidence_0.385_Length_956,<br>SampleTS2_Locus_1483_Transcript_3/13_Confidence_0.364_Length_1620<br>, Sample6_Locus_1849_Transcript_4/6_Confidence_0.429_Length_866,<br>Sample3_Locus_345_Transcript_6/8_Confidence_0.455_Length_1801,<br>SampleTS3_Locus_5573_Transcript_4/5_Confidence_0.333_Length_940,<br>Sample3_Locus_10699_Transcript_3/4_Confidence_0.400_Length_957,<br>Sample3_Locus_27182_Transcript_2/3_Confidence_0.250_Length_1010,<br>SampleTS1_Locus_6359_Transcript_7/7_Confidence_0.294_Length_1274,<br>Sample1_Locus_7813_Transcript_4/8_Confidence_0.643_Length_1238,<br>SampleTS2_Locus_12437_Transcript_2/3_Confidence_0.667_Length_1244<br>,<br>SampleTS1_Locus_1762_Transcript_13/36_Confidence_0.058_Length_819<br>,<br>SampleTS3_Locus_11402_Transcript_2/3_Confidence_0.333_Length_597,<br>Sample1_Locus_3772_Transcript_1/3_Confidence_0.333_Length_1976,<br>SampleTS3_Locus_6992_Transcript_3/6_Confidence_0.500_Length_986,<br>Sample1_Locus_19788_Transcript_1/1_Confidence_0.333_Length_1516,<br>Sample6_Locus_5179_Transcript_1/5_Confidence_0.400_Length_1830,<br>Sample1_Locus_25958_Transcript_3/6_Confidence_0.286_Length_1845,<br>SampleTS1_Locus_10744_Transcript_1/2_Confidence_0.750_Length_662,<br>Sample6_Locus_7420_Transcript_2/3_Confidence_0.333_Length_873,<br>SampleTS2_Locus_4529_Transcript_4/5_Confidence_0.500_Length_1425,<br>SampleTS1_Locus_8634_Transcript_2/3_Confidence_0.333_Length_1251,<br>Sample6_Locus_18352_Transcript_2/2_Confidence_0.333_Length_583,<br>SampleTS1_Locus_6605_Transcript_10/11_Confidence_0.600_Length_612<br>, Sample1_Locus_24940_Transcript_2/3_Confidence_0.051_Length_716,<br>Sample3_Locus_2973_Transcript_5/8_Confidence_0.556_Length_3914,<br>Sample6_Locus_5933_Transcript_3/4_Confidence_0.071_Length_879,<br>Sample1_Locus_11973_Transcript_3/4_Confidence_0.500_Length_1566,<br>SampleTS1_Locus_2024_Transcript_1/6_Confidence_0.571_Length_829,<br>Sample3_Locus_5177_Transcript_4/6_Confidence_0.400_Length_1433,<br>SampleTS1_Locus_3621_Transcript_2/4_Confidence_0.143_Length_620,<br>Sample6_Locus_17542_Transcript_6/8_Confidence_0.700_Length_1235,<br>Sample6_Locus_5933_Transcript_3/4_Confidence_0.071_Length_879,<br>SampleTS2_Locus_1483_Transcript_3/13_Confidence_0.364_Length_1620<br>,<br>SampleTS2_Locus_5848_Transcript_1/1_Confidence_0.000_Length_1345,<br>SampleTS3_Locus_15776_Transcript_1/2_Confidence_0.333_Length_1102<br>,<br>SampleTS1_Locus_6359_Transcript_7/7_Confidence_0.294_Length_1274,<br>Sample6_Locus_15085_Transcript_1/1_Confidence_0.000_Length_1486,<br>SampleTS1_Locus_6152_Transcript_2/7_Confidence_0.375_Length_1167,<br>Sample1_Locus_24078_Transcript_6/7_Confidence_0.150_Length_1572 |
|------------------------------|----------|----|----------------------------------------------------------------------------------------------------------------------------------------------------------------------------------------------------------------------------------------------------------------------------------------------------------------------------------------------------------------------------------------------------------------------------------------------------------------------------------------------------------------------------------------------------------------------------------------------|-------------------------------------------------------------------------------------|--------------------------------------------------------------------------------------------------------------------------------------------------------------------------------------------------------------------------------------------------------------------------------------------------------------------------------------------------------------------------------------------------------------------------------------------------------------------------------------------------------------------------------------------------------------------------------------------------------------------------------------------------------------------------------------------------------------------------------------------------------------------------------------------------------------------------------------------------------------------------------------------------------------------------------------------------------------------------------------------------------------------------------------------------------------------------------------------------------------------------------------------------------------------------------------------------------------------------------------------------------------------------------------------------------------------------------------------------------------------------------------------------------------------------------------------------------------------------------------------------------------------------------------------------------------------------------------------------------------------------------------------------------------------------------------------------------------------------------------------------------------------------------------------------------------------------------------------------------------------------------------------------------------------------------------------------------------------------------------------------------------------------------------------------------------------------------------------------------------------------------------------------------------------------------------------------------------------------------------------------------------------------------------------------------------------------------------------------------------------------------------------------------------------------------------------------------------------------------------------------------------------------------------------------------------------------------------------------------------------------------------------------------------------------------------------------------------------------------------------------------------------------------------------------------------------------------------------------------------------------------------------------------------------------------------------------------------------------------------------------------------------------------------------------------------------------------------------------------------------------------------------------------------------------------------------------------------------------------------------------------------------------------------------------------------------------------------------------------------------------------------------------------------------------------------------------------------------------------------------------------------------------------------------------------------------------------------------------------------------------------------------------------------------------------------------------------------|

|                                                            |          |    |                                                                                                                                                                                                                                                                                                                                                                                                                                                                                                        |                                                                              |                                                                                                                                                                                                                                                                                                                                                                                                                                                                                                                                                                                                                                                                                                                                                                                                                                                                                                                                                                                                                                                                                                                                                                                                                                                                                                                                                                                                                                                                                                                                                                                                                                                                                                                                                                                                                                                                                                                                                                                                                                                                                                               |
|------------------------------------------------------------|----------|----|--------------------------------------------------------------------------------------------------------------------------------------------------------------------------------------------------------------------------------------------------------------------------------------------------------------------------------------------------------------------------------------------------------------------------------------------------------------------------------------------------------|------------------------------------------------------------------------------|---------------------------------------------------------------------------------------------------------------------------------------------------------------------------------------------------------------------------------------------------------------------------------------------------------------------------------------------------------------------------------------------------------------------------------------------------------------------------------------------------------------------------------------------------------------------------------------------------------------------------------------------------------------------------------------------------------------------------------------------------------------------------------------------------------------------------------------------------------------------------------------------------------------------------------------------------------------------------------------------------------------------------------------------------------------------------------------------------------------------------------------------------------------------------------------------------------------------------------------------------------------------------------------------------------------------------------------------------------------------------------------------------------------------------------------------------------------------------------------------------------------------------------------------------------------------------------------------------------------------------------------------------------------------------------------------------------------------------------------------------------------------------------------------------------------------------------------------------------------------------------------------------------------------------------------------------------------------------------------------------------------------------------------------------------------------------------------------------------------|
| <b>Phenylalanine, tyrosine and tryptophan biosynthesis</b> | map00400 | 18 | ec:2.7.1.71 kinase,<br>ec:1.4.3.2 oxidase,<br>ec:2.6.1.57 transaminase,<br>ec:2.6.1.58 transaminase,<br>ec:4.1.3.27 synthase,<br>ec:4.2.3.5 synthase,<br>ec:4.2.3.4 synthase,<br>ec:4.2.1.51 dehydratase,<br>ec:2.6.1.78 aminotransferase,<br>ec:2.6.1.79 aminotransferase,<br>ec:4.2.1.91 dehydratase,<br>ec:4.2.1.20 synthase,<br>ec:2.6.1.5 transaminase,<br>ec:2.6.1.9 transaminase,<br>ec:2.6.1.1 transaminase,<br>ec:2.5.1.54 synthase,<br>ec:1.14.16.1 4monooxygenase,<br>ec:5.3.1.24 isomerase | 1, 1,<br>2, 1,<br>1, 1,<br>2, 1,<br>3, 3,<br>1, 3,<br>2, 2,<br>3, 1,<br>1, 1 | SampleTS2_Locus_1705_Transcript_2/5_Confidence_0.667_Length_1103,<br>SampleTS1_Locus_1041_Transcript_1/5_Confidence_0.400_Length_2190,<br>Sample1_Locus_26802_Transcript_1/2_Confidence_0.667_Length_439,<br>Sample6_Locus_13664_Transcript_1/2_Confidence_0.333_Length_862,<br>Sample6_Locus_22798_Transcript_3/3_Confidence_0.250_Length_666,<br>Sample1_Locus_5305_Transcript_3/12_Confidence_0.143_Length_2221,<br>SampleTS2_Locus_10844_Transcript_3/4_Confidence_0.200_Length_1482,<br>Sample6_Locus_15905_Transcript_2/2_Confidence_0.000_Length_483,<br>Sample3_Locus_8753_Transcript_3/7_Confidence_0.053_Length_1045,<br>Sample6_Locus_164_Transcript_78/296_Confidence_0.027_Length_1952,<br>Sample1_Locus_26802_Transcript_1/2_Confidence_0.667_Length_439,<br>Sample6_Locus_13664_Transcript_1/2_Confidence_0.333_Length_862,<br>SampleTS2_Locus_6646_Transcript_2/2_Confidence_0.333_Length_1520,<br>Sample1_Locus_26802_Transcript_1/2_Confidence_0.667_Length_439,<br>Sample6_Locus_13664_Transcript_1/2_Confidence_0.333_Length_862,<br>SampleTS2_Locus_6646_Transcript_2/2_Confidence_0.333_Length_1520,<br>Sample6_Locus_164_Transcript_78/296_Confidence_0.027_Length_1952,<br>SampleTS3_Locus_9447_Transcript_3/3_Confidence_0.000_Length_886,<br>Sample6_Locus_6882_Transcript_6/8_Confidence_0.429_Length_1475,<br>SampleTS1_Locus_10894_Transcript_1/1_Confidence_0.000_Length_652,<br>Sample1_Locus_26802_Transcript_1/2_Confidence_0.667_Length_439,<br>Sample6_Locus_13664_Transcript_1/2_Confidence_0.333_Length_862,<br>Sample1_Locus_26802_Transcript_1/2_Confidence_0.667_Length_439,<br>Sample6_Locus_13664_Transcript_1/2_Confidence_0.333_Length_862,<br>Sample1_Locus_26802_Transcript_1/2_Confidence_0.667_Length_439,<br>Sample6_Locus_13664_Transcript_1/2_Confidence_0.333_Length_862,<br>SampleTS2_Locus_6646_Transcript_2/2_Confidence_0.333_Length_1520,<br>Sample3_Locus_8990_Transcript_7/9_Confidence_0.091_Length_1811,<br>Sample3_Locus_2321_Transcript_7/9_Confidence_0.414_Length_1007,<br>SampleTS1_Locus_12931_Transcript_3/3_Confidence_0.200_Length_1113 |
|------------------------------------------------------------|----------|----|--------------------------------------------------------------------------------------------------------------------------------------------------------------------------------------------------------------------------------------------------------------------------------------------------------------------------------------------------------------------------------------------------------------------------------------------------------------------------------------------------------|------------------------------------------------------------------------------|---------------------------------------------------------------------------------------------------------------------------------------------------------------------------------------------------------------------------------------------------------------------------------------------------------------------------------------------------------------------------------------------------------------------------------------------------------------------------------------------------------------------------------------------------------------------------------------------------------------------------------------------------------------------------------------------------------------------------------------------------------------------------------------------------------------------------------------------------------------------------------------------------------------------------------------------------------------------------------------------------------------------------------------------------------------------------------------------------------------------------------------------------------------------------------------------------------------------------------------------------------------------------------------------------------------------------------------------------------------------------------------------------------------------------------------------------------------------------------------------------------------------------------------------------------------------------------------------------------------------------------------------------------------------------------------------------------------------------------------------------------------------------------------------------------------------------------------------------------------------------------------------------------------------------------------------------------------------------------------------------------------------------------------------------------------------------------------------------------------|

|                                                |          |    |                                                                                                                                                                                                                                                                                                                                                                                                                                                                                                                                                                                                              |                                                                              |                                                                                                                                                                                                                                                                                                                                                                                                                                                                                                                                                                                                                                                                                                                                                                                                                                                                                                                                                                                                                                                                                                                                                                                                                                                                                                                                                                                                                                                                                                                                                                                                                                                                                                                                                                                                                                                                                                                                                                                                          |
|------------------------------------------------|----------|----|--------------------------------------------------------------------------------------------------------------------------------------------------------------------------------------------------------------------------------------------------------------------------------------------------------------------------------------------------------------------------------------------------------------------------------------------------------------------------------------------------------------------------------------------------------------------------------------------------------------|------------------------------------------------------------------------------|----------------------------------------------------------------------------------------------------------------------------------------------------------------------------------------------------------------------------------------------------------------------------------------------------------------------------------------------------------------------------------------------------------------------------------------------------------------------------------------------------------------------------------------------------------------------------------------------------------------------------------------------------------------------------------------------------------------------------------------------------------------------------------------------------------------------------------------------------------------------------------------------------------------------------------------------------------------------------------------------------------------------------------------------------------------------------------------------------------------------------------------------------------------------------------------------------------------------------------------------------------------------------------------------------------------------------------------------------------------------------------------------------------------------------------------------------------------------------------------------------------------------------------------------------------------------------------------------------------------------------------------------------------------------------------------------------------------------------------------------------------------------------------------------------------------------------------------------------------------------------------------------------------------------------------------------------------------------------------------------------------|
| <b>Carbon fixation pathways in prokaryotes</b> | map00720 | 18 | ec:6.4.1.2<br>carboxylase,<br>ec:6.4.1.3<br>carboxylase,<br>ec:1.3.5.1<br>dehydrogenase,<br>ec:4.1.1.31<br>carboxylase,<br>ec:4.2.1.3<br>hydratase,<br>ec:4.2.1.2<br>hydratase,<br>ec:3.5.4.9<br>cyclohydrolase,<br>ec:6.2.1.5<br>ligase<br>(ADPforming),<br>ec:6.2.1.1<br>ligase,<br>ec:5.4.99.2<br>mutase,<br>ec:4.2.1.17<br>hydratase,<br>ec:2.7.9.1<br>phosphate<br>dikinase,<br>ec:2.3.1.9<br>Cacetyltransfer<br>ase, ec:1.1.1.37<br>dehydrogenase,<br>ec:1.1.1.35<br>dehydrogenase,<br>ec:1.3.1.6<br>reductase<br>(NADH),<br>ec:1.5.1.5<br>dehydrogenase<br>(NADP+),<br>ec:2.3.3.8<br>citrate synthase | 2, 2,<br>1, 1,<br>1, 2,<br>1, 2,<br>1, 1,<br>2, 3,<br>1, 1,<br>3, 2,<br>1, 1 | Sample3_Locus_8920_Transcript_2/3_Confidence_0.333_Length_2038,<br>SampleTS1_Locus_1155_Transcript_11/16_Confidence_0.625_Length_224<br>0,<br>SampleTS1_Locus_1968_Transcript_1/3_Confidence_0.400_Length_530,<br>SampleTS1_Locus_1155_Transcript_11/16_Confidence_0.625_Length_224<br>0,<br>SampleTS2_Locus_54_Transcript_4/10_Confidence_0.083_Length_1374,<br>Sample3_Locus_7378_Transcript_3/6_Confidence_0.417_Length_3416,<br>SampleTS2_Locus_7424_Transcript_6/8_Confidence_0.286_Length_3139,<br>Sample3_Locus_2252_Transcript_9/13_Confidence_0.647_Length_1708,<br>Sample6_Locus_1413_Transcript_3/3_Confidence_0.000_Length_1802,<br>Sample6_Locus_4997_Transcript_3/6_Confidence_0.429_Length_1455,<br>Sample3_Locus_2152_Transcript_2/3_Confidence_0.333_Length_1481,<br>SampleTS3_Locus_6340_Transcript_1/1_Confidence_0.000_Length_1077,<br>SampleTS3_Locus_456_Transcript_2/6_Confidence_0.200_Length_2075,<br>Sample1_Locus_12424_Transcript_3/6_Confidence_0.500_Length_2400,<br>SampleTS1_Locus_789_Transcript_9/11_Confidence_0.238_Length_2300,<br>Sample3_Locus_5282_Transcript_2/7_Confidence_0.700_Length_1266,<br>SampleTS1_Locus_793_Transcript_3/3_Confidence_0.000_Length_1036,<br>Sample6_Locus_2229_Transcript_3/3_Confidence_0.000_Length_1460,<br>SampleTS2_Locus_3926_Transcript_9/12_Confidence_0.038_Length_2167<br>,<br>SampleTS2_Locus_1750_Transcript_17/20_Confidence_0.182_Length_156<br>8, Sample6_Locus_293_Transcript_1/2_Confidence_0.333_Length_875,<br>SampleTS1_Locus_789_Transcript_9/11_Confidence_0.238_Length_2300,<br>SampleTS3_Locus_1827_Transcript_3/3_Confidence_0.000_Length_1033,<br>SampleTS3_Locus_11808_Transcript_9/11_Confidence_0.565_Length_100<br>6,<br>SampleTS3_Locus_3772_Transcript_3/6_Confidence_0.130_Length_1377,<br>SampleTS1_Locus_13834_Transcript_7/9_Confidence_0.143_Length_2053<br>, Sample6_Locus_4997_Transcript_3/6_Confidence_0.429_Length_1455,<br>SampleTS3_Locus_443_Transcript_4/7_Confidence_0.429_Length_1718 |
|------------------------------------------------|----------|----|--------------------------------------------------------------------------------------------------------------------------------------------------------------------------------------------------------------------------------------------------------------------------------------------------------------------------------------------------------------------------------------------------------------------------------------------------------------------------------------------------------------------------------------------------------------------------------------------------------------|------------------------------------------------------------------------------|----------------------------------------------------------------------------------------------------------------------------------------------------------------------------------------------------------------------------------------------------------------------------------------------------------------------------------------------------------------------------------------------------------------------------------------------------------------------------------------------------------------------------------------------------------------------------------------------------------------------------------------------------------------------------------------------------------------------------------------------------------------------------------------------------------------------------------------------------------------------------------------------------------------------------------------------------------------------------------------------------------------------------------------------------------------------------------------------------------------------------------------------------------------------------------------------------------------------------------------------------------------------------------------------------------------------------------------------------------------------------------------------------------------------------------------------------------------------------------------------------------------------------------------------------------------------------------------------------------------------------------------------------------------------------------------------------------------------------------------------------------------------------------------------------------------------------------------------------------------------------------------------------------------------------------------------------------------------------------------------------------|



|                                                    |          |    |                                                                                                                                                                                                                                                                                                                                                                                                                                                                                                                                                                                                                                                                                                                                                 |                                                                           |                                                                                                                                                                                                                                                                                                                                                                                                                                                                                                                                                                                                                                                                                                                                                                                                                                                                                                                                                                                                                                                                                                                                                                                                                                                                                                                                                                                                                                                                                                                                                                                                                                                                                                                                                                                                                                                                                                                                                                                                                                                                                                                                                                                                                                                                                                                                                       |
|----------------------------------------------------|----------|----|-------------------------------------------------------------------------------------------------------------------------------------------------------------------------------------------------------------------------------------------------------------------------------------------------------------------------------------------------------------------------------------------------------------------------------------------------------------------------------------------------------------------------------------------------------------------------------------------------------------------------------------------------------------------------------------------------------------------------------------------------|---------------------------------------------------------------------------|-------------------------------------------------------------------------------------------------------------------------------------------------------------------------------------------------------------------------------------------------------------------------------------------------------------------------------------------------------------------------------------------------------------------------------------------------------------------------------------------------------------------------------------------------------------------------------------------------------------------------------------------------------------------------------------------------------------------------------------------------------------------------------------------------------------------------------------------------------------------------------------------------------------------------------------------------------------------------------------------------------------------------------------------------------------------------------------------------------------------------------------------------------------------------------------------------------------------------------------------------------------------------------------------------------------------------------------------------------------------------------------------------------------------------------------------------------------------------------------------------------------------------------------------------------------------------------------------------------------------------------------------------------------------------------------------------------------------------------------------------------------------------------------------------------------------------------------------------------------------------------------------------------------------------------------------------------------------------------------------------------------------------------------------------------------------------------------------------------------------------------------------------------------------------------------------------------------------------------------------------------------------------------------------------------------------------------------------------------|
| <b>Carbon fixation in photosynthetic organisms</b> | map00710 | 17 | ec:4.1.2.13<br>aldolase,<br>ec:4.1.1.49<br>carboxykinase<br>(ATP),<br>ec:4.1.1.39<br>carboxylase,<br>ec:4.1.1.31<br>carboxylase,<br>ec:2.2.1.1<br>glycolaldehydet<br>ransferase,<br>ec:1.2.1.59<br>dehydrogenase<br>(NAD(P)+)<br>(phosphorylatin<br>g), ec:2.7.1.19<br>phosphopentok<br>inase, ec:5.1.3.1<br>3epimerase,<br>ec:3.1.3.11<br>hexose<br>diphosphatase,<br>ec:1.2.1.13<br>dehydrogenase<br>(NADP+)<br>(phosphorylatin<br>g), ec:1.2.1.12<br>dehydrogenase<br>(phosphorylatin<br>g), ec:5.3.1.6<br>isomerase,<br>ec:2.6.1.2<br>transaminase,<br>ec:2.6.1.1<br>transaminase,<br>ec:2.7.9.1<br>phosphate<br>dikinase,<br>ec:1.1.1.37<br>dehydrogenase,<br>ec:1.1.1.40<br>dehydrogenase<br>(oxaloacetatede<br>carboxylating)<br>(NADP+) | 2, 1,<br>1, 1,<br>1, 3,<br>1, 1,<br>2, 1,<br>5, 2,<br>3, 3,<br>3, 1,<br>2 | Sample3_Locus_324_Transcript_3/17_Confidence_0.222_Length_1711,<br>Sample6_Locus_28252_Transcript_2/3_Confidence_0.500_Length_808,<br>Sample6_Locus_11174_Transcript_1/1_Confidence_0.000_Length_1998,<br>SampleTS1_Locus_4324_Transcript_3/4_Confidence_0.286_Length_1536,<br>Sample3_Locus_7378_Transcript_3/6_Confidence_0.417_Length_3416,<br>SampleTS1_Locus_16129_Transcript_1/1_Confidence_0.000_Length_1960<br>,<br>SampleTS2_Locus_819_Transcript_16/18_Confidence_0.250_Length_1000<br>,<br>SampleTS2_Locus_12618_Transcript_4/6_Confidence_0.571_Length_1272<br>, Sample6_Locus_997_Transcript_9/17_Confidence_0.200_Length_950,<br>SampleTS2_Locus_12437_Transcript_2/3_Confidence_0.667_Length_1244<br>, Sample3_Locus_3334_Transcript_1/5_Confidence_0.400_Length_1030,<br>Sample3_Locus_10262_Transcript_4/5_Confidence_0.062_Length_1337,<br>Sample6_Locus_2283_Transcript_7/17_Confidence_0.225_Length_1818,<br>Sample1_Locus_7420_Transcript_10/14_Confidence_0.154_Length_1346,<br>SampleTS2_Locus_819_Transcript_16/18_Confidence_0.250_Length_1000<br>,<br>Sample1_Locus_7420_Transcript_10/14_Confidence_0.154_Length_1346,<br>SampleTS2_Locus_12618_Transcript_4/6_Confidence_0.571_Length_1272<br>, Sample6_Locus_997_Transcript_9/17_Confidence_0.200_Length_950,<br>Sample1_Locus_393_Transcript_6/7_Confidence_0.556_Length_1466,<br>SampleTS1_Locus_27877_Transcript_2/3_Confidence_0.333_Length_987,<br>Sample3_Locus_9475_Transcript_2/2_Confidence_0.000_Length_1080,<br>Sample6_Locus_2195_Transcript_14/16_Confidence_0.176_Length_1741,<br>SampleTS3_Locus_714_Transcript_7/14_Confidence_0.087_Length_1194,<br>Sample1_Locus_19449_Transcript_1/1_Confidence_0.000_Length_1704,<br>Sample1_Locus_26802_Transcript_1/2_Confidence_0.667_Length_439,<br>Sample6_Locus_13664_Transcript_1/2_Confidence_0.333_Length_862,<br>SampleTS2_Locus_6646_Transcript_2/2_Confidence_0.333_Length_1520,<br>SampleTS1_Locus_793_Transcript_3/3_Confidence_0.000_Length_1036,<br>Sample6_Locus_2229_Transcript_3/3_Confidence_0.000_Length_1460,<br>SampleTS2_Locus_3926_Transcript_9/12_Confidence_0.038_Length_2167<br>, Sample6_Locus_293_Transcript_1/2_Confidence_0.333_Length_875,<br>Sample3_Locus_24109_Transcript_4/4_Confidence_0.000_Length_2026,<br>SampleTS2_Locus_3140_Transcript_18/19_Confidence_0.323_Length_745 |
|----------------------------------------------------|----------|----|-------------------------------------------------------------------------------------------------------------------------------------------------------------------------------------------------------------------------------------------------------------------------------------------------------------------------------------------------------------------------------------------------------------------------------------------------------------------------------------------------------------------------------------------------------------------------------------------------------------------------------------------------------------------------------------------------------------------------------------------------|---------------------------------------------------------------------------|-------------------------------------------------------------------------------------------------------------------------------------------------------------------------------------------------------------------------------------------------------------------------------------------------------------------------------------------------------------------------------------------------------------------------------------------------------------------------------------------------------------------------------------------------------------------------------------------------------------------------------------------------------------------------------------------------------------------------------------------------------------------------------------------------------------------------------------------------------------------------------------------------------------------------------------------------------------------------------------------------------------------------------------------------------------------------------------------------------------------------------------------------------------------------------------------------------------------------------------------------------------------------------------------------------------------------------------------------------------------------------------------------------------------------------------------------------------------------------------------------------------------------------------------------------------------------------------------------------------------------------------------------------------------------------------------------------------------------------------------------------------------------------------------------------------------------------------------------------------------------------------------------------------------------------------------------------------------------------------------------------------------------------------------------------------------------------------------------------------------------------------------------------------------------------------------------------------------------------------------------------------------------------------------------------------------------------------------------------|



|                                                   |          |    |                                                                                                                                                                                                                                                                                                                                                                                                                                                      |                                             |                                                                                                                                                                                                                                                                                                                                                                                                                                                                                                                                                                                                                                                                                                                                                                                                                                                                                                                                                                                                                                                                                                                                                                                                                                                                                                                                                                                                                                                                                                                                                                                                                                                                                                                                                                                 |
|---------------------------------------------------|----------|----|------------------------------------------------------------------------------------------------------------------------------------------------------------------------------------------------------------------------------------------------------------------------------------------------------------------------------------------------------------------------------------------------------------------------------------------------------|---------------------------------------------|---------------------------------------------------------------------------------------------------------------------------------------------------------------------------------------------------------------------------------------------------------------------------------------------------------------------------------------------------------------------------------------------------------------------------------------------------------------------------------------------------------------------------------------------------------------------------------------------------------------------------------------------------------------------------------------------------------------------------------------------------------------------------------------------------------------------------------------------------------------------------------------------------------------------------------------------------------------------------------------------------------------------------------------------------------------------------------------------------------------------------------------------------------------------------------------------------------------------------------------------------------------------------------------------------------------------------------------------------------------------------------------------------------------------------------------------------------------------------------------------------------------------------------------------------------------------------------------------------------------------------------------------------------------------------------------------------------------------------------------------------------------------------------|
| <b>Valine, leucine and isoleucine degradation</b> | map00280 | 15 | ec:2.6.1.18 transaminase, ec:6.4.1.3 carboxylase, ec:1.4.3.2 oxidase, ec:1.2.1.27 dehydrogenase (CoAacylating), ec:2.6.1.40 transaminase, ec:2.6.1.42 transaminase, ec:2.3.1.16 Cacyltransferase, ec:5.4.99.2 mutase, ec:1.8.1.4 dehydrogenase, ec:4.2.1.17 hydratase, ec:1.2.1.3 dehydrogenase (NAD+), ec:2.3.1.9 Cacetyltransferase, ec:1.1.1.35 dehydrogenase, ec:1.1.1.31 dehydrogenase, ec:1.2.4.4 dehydrogenase (2methylpropanoyltransferring) | 1, 2, 1, 1, 1, 2, 1, 1, 1, 2, 6, 1, 3, 1, 2 | Sample3_Locus_1833_Transcript_4/6_Confidence_0.500_Length_1265, SampleTS1_Locus_1968_Transcript_1/3_Confidence_0.400_Length_530, SampleTS1_Locus_1155_Transcript_11/16_Confidence_0.625_Length_2240, SampleTS1_Locus_1041_Transcript_1/5_Confidence_0.400_Length_2190, SampleTS3_Locus_23038_Transcript_2/3_Confidence_0.333_Length_1864, Sample3_Locus_1833_Transcript_4/6_Confidence_0.500_Length_1265, Sample1_Locus_18777_Transcript_2/4_Confidence_0.923_Length_1416, Sample3_Locus_5952_Transcript_4/4_Confidence_0.000_Length_2586, SampleTS2_Locus_1750_Transcript_17/20_Confidence_0.182_Length_1568, Sample1_Locus_12424_Transcript_3/6_Confidence_0.500_Length_2400, SampleTS3_Locus_4699_Transcript_6/10_Confidence_0.579_Length_1963, SampleTS1_Locus_789_Transcript_9/11_Confidence_0.238_Length_2300, Sample3_Locus_5282_Transcript_2/7_Confidence_0.700_Length_1266, SampleTS3_Locus_23038_Transcript_2/3_Confidence_0.333_Length_1864, SampleTS2_Locus_4874_Transcript_6/12_Confidence_0.158_Length_1042, Sample3_Locus_23176_Transcript_2/3_Confidence_0.333_Length_1282, SampleTS1_Locus_5373_Transcript_26/33_Confidence_0.065_Length_1620, Sample6_Locus_12695_Transcript_1/2_Confidence_0.333_Length_2218, SampleTS3_Locus_23264_Transcript_1/3_Confidence_0.500_Length_845, SampleTS2_Locus_1750_Transcript_17/20_Confidence_0.182_Length_1568, SampleTS1_Locus_789_Transcript_9/11_Confidence_0.238_Length_2300, SampleTS3_Locus_1827_Transcript_3/3_Confidence_0.000_Length_1033, SampleTS3_Locus_11808_Transcript_9/11_Confidence_0.565_Length_1006, Sample6_Locus_10552_Transcript_5/5_Confidence_0.000_Length_1013, Sample1_Locus_24165_Transcript_4/4_Confidence_0.444_Length_605, SampleTS2_Locus_9103_Transcript_1/2_Confidence_0.667_Length_685 |
|---------------------------------------------------|----------|----|------------------------------------------------------------------------------------------------------------------------------------------------------------------------------------------------------------------------------------------------------------------------------------------------------------------------------------------------------------------------------------------------------------------------------------------------------|---------------------------------------------|---------------------------------------------------------------------------------------------------------------------------------------------------------------------------------------------------------------------------------------------------------------------------------------------------------------------------------------------------------------------------------------------------------------------------------------------------------------------------------------------------------------------------------------------------------------------------------------------------------------------------------------------------------------------------------------------------------------------------------------------------------------------------------------------------------------------------------------------------------------------------------------------------------------------------------------------------------------------------------------------------------------------------------------------------------------------------------------------------------------------------------------------------------------------------------------------------------------------------------------------------------------------------------------------------------------------------------------------------------------------------------------------------------------------------------------------------------------------------------------------------------------------------------------------------------------------------------------------------------------------------------------------------------------------------------------------------------------------------------------------------------------------------------|

|                                           |          |    |                                                                                                                                                                                                                                                                                                                                                                                           |                                                                  |                                                                                                                                                                                                                                                                                                                                                                                                                                                                                                                                                                                                                                                                                                                                                                                                                                                                                                                                                                                                                                                                                                                                                                                                                                                                                                                                                                                                                                                                                                                         |
|-------------------------------------------|----------|----|-------------------------------------------------------------------------------------------------------------------------------------------------------------------------------------------------------------------------------------------------------------------------------------------------------------------------------------------------------------------------------------------|------------------------------------------------------------------|-------------------------------------------------------------------------------------------------------------------------------------------------------------------------------------------------------------------------------------------------------------------------------------------------------------------------------------------------------------------------------------------------------------------------------------------------------------------------------------------------------------------------------------------------------------------------------------------------------------------------------------------------------------------------------------------------------------------------------------------------------------------------------------------------------------------------------------------------------------------------------------------------------------------------------------------------------------------------------------------------------------------------------------------------------------------------------------------------------------------------------------------------------------------------------------------------------------------------------------------------------------------------------------------------------------------------------------------------------------------------------------------------------------------------------------------------------------------------------------------------------------------------|
| <b>AminoacylR<br/>NA<br/>biosynthesis</b> | map00970 | 15 | ec:6.1.1.6<br>ligase,<br>ec:6.1.1.7<br>ligase,<br>ec:6.1.1.9<br>ligase,<br>ec:6.1.1.2<br>ligase,<br>ec:6.1.1.3<br>ligase,<br>ec:6.1.1.4<br>ligase,<br>ec:6.1.1.5<br>ligase,<br>ec:6.1.1.1<br>ligase,<br>ec:6.1.1.17<br>ligase,<br>ec:6.1.1.14<br>ligase,<br>ec:6.1.1.15<br>ligase,<br>ec:6.1.1.10<br>ligase,<br>ec:6.1.1.11<br>ligase,<br>ec:6.1.1.21<br>ligase,<br>ec:6.1.1.20<br>ligase | 1, 1,<br>1, 1,<br>1, 1,<br>4, 1,<br>2, 1,<br>2, 1,<br>1, 1,<br>2 | Sample3_Locus_4849_Transcript_2/3_Confidence_0.333_Length_1992,<br>Sample1_Locus_12667_Transcript_5/9_Confidence_0.391_Length_935,<br>Sample1_Locus_8266_Transcript_6/7_Confidence_0.333_Length_1182,<br>Sample3_Locus_7465_Transcript_6/8_Confidence_0.455_Length_2812,<br>SampleTS3_Locus_15910_Transcript_1/1_Confidence_0.000_Length_2059<br>, Sample3_Locus_4481_Transcript_6/9_Confidence_0.333_Length_3617,<br>Sample6_Locus_10979_Transcript_4/6_Confidence_0.067_Length_821,<br>SampleTS1_Locus_1930_Transcript_7/12_Confidence_0.552_Length_1752<br>,<br>SampleTS1_Locus_2851_Transcript_1/3_Confidence_0.667_Length_1262,<br>Sample1_Locus_16131_Transcript_3/4_Confidence_0.667_Length_1151,<br>Sample1_Locus_8266_Transcript_6/7_Confidence_0.333_Length_1182,<br>SampleTS1_Locus_19795_Transcript_1/3_Confidence_0.333_Length_2365<br>,<br>SampleTS1_Locus_12215_Transcript_1/1_Confidence_0.000_Length_1974<br>,<br>SampleTS1_Locus_18025_Transcript_1/1_Confidence_0.000_Length_511,<br>SampleTS1_Locus_19795_Transcript_1/3_Confidence_0.333_Length_2365<br>,<br>SampleTS1_Locus_12215_Transcript_1/1_Confidence_0.000_Length_1974<br>,<br>SampleTS1_Locus_1827_Transcript_15/16_Confidence_0.043_Length_267<br>2,<br>SampleTS2_Locus_13321_Transcript_3/3_Confidence_0.000_Length_1479<br>,<br>Sample3_Locus_1944_Transcript_12/13_Confidence_0.053_Length_1388,<br>Sample3_Locus_2323_Transcript_7/7_Confidence_0.100_Length_1063,<br>Sample1_Locus_1466_Transcript_4/5_Confidence_0.286_Length_2081 |
|-------------------------------------------|----------|----|-------------------------------------------------------------------------------------------------------------------------------------------------------------------------------------------------------------------------------------------------------------------------------------------------------------------------------------------------------------------------------------------|------------------------------------------------------------------|-------------------------------------------------------------------------------------------------------------------------------------------------------------------------------------------------------------------------------------------------------------------------------------------------------------------------------------------------------------------------------------------------------------------------------------------------------------------------------------------------------------------------------------------------------------------------------------------------------------------------------------------------------------------------------------------------------------------------------------------------------------------------------------------------------------------------------------------------------------------------------------------------------------------------------------------------------------------------------------------------------------------------------------------------------------------------------------------------------------------------------------------------------------------------------------------------------------------------------------------------------------------------------------------------------------------------------------------------------------------------------------------------------------------------------------------------------------------------------------------------------------------------|



|                                         |                 |           |                                                                                                                                                                                                                                                                                                                                                                                                                                                                                                   |                                              |                                                                                                                                                                                                                                                                                                                                                                                                                                                                                                                                                                                                                                                                                                                                                                                                                                                                                                                                                                                                                                                                                                                                                                                                                                                                                                                                                                                                                                                                                                 |
|-----------------------------------------|-----------------|-----------|---------------------------------------------------------------------------------------------------------------------------------------------------------------------------------------------------------------------------------------------------------------------------------------------------------------------------------------------------------------------------------------------------------------------------------------------------------------------------------------------------|----------------------------------------------|-------------------------------------------------------------------------------------------------------------------------------------------------------------------------------------------------------------------------------------------------------------------------------------------------------------------------------------------------------------------------------------------------------------------------------------------------------------------------------------------------------------------------------------------------------------------------------------------------------------------------------------------------------------------------------------------------------------------------------------------------------------------------------------------------------------------------------------------------------------------------------------------------------------------------------------------------------------------------------------------------------------------------------------------------------------------------------------------------------------------------------------------------------------------------------------------------------------------------------------------------------------------------------------------------------------------------------------------------------------------------------------------------------------------------------------------------------------------------------------------------|
| <p><b>Citrate cycle (TCA cycle)</b></p> | <p>map00020</p> | <p>15</p> | <p>ec:2.3.1.61 succinyltransferase, ec:4.1.1.49 carboxykinase (ATP), ec:1.3.5.1 dehydrogenase, ec:4.1.1.32 carboxykinase (GTP), ec:4.2.1.3 hydratase, ec:4.2.1.2 hydratase, ec:6.2.1.5 ligase (ADPforming), ec:6.2.1.4 ligase (GDPforming), ec:2.3.1.12 acetyltransferase, ec:1.8.1.4 dehydrogenase, ec:1.1.1.37 dehydrogenase, ec:2.3.3.8 citrate synthase, ec:2.3.3.1 (S<sub>i</sub>)synthase, ec:1.2.4.2 dehydrogenase (succinyltransfering), ec:1.2.4.1 dehydrogenase (acetyltransfering)</p> | <p>1, 1, 1, 1, 2, 2, 2, 1, 1, 1, 3, 1, 2</p> | <p>Sample3_Locus_4770_Transcript_12/16_Confidence_0.420_Length_1753, Sample6_Locus_11174_Transcript_1/1_Confidence_0.000_Length_1998, SampleTS2_Locus_54_Transcript_4/10_Confidence_0.083_Length_1374, Sample6_Locus_11174_Transcript_1/1_Confidence_0.000_Length_1998, SampleTS2_Locus_7424_Transcript_6/8_Confidence_0.286_Length_3139, Sample3_Locus_2252_Transcript_9/13_Confidence_0.647_Length_1708, Sample6_Locus_1413_Transcript_3/3_Confidence_0.000_Length_1802, Sample3_Locus_2152_Transcript_2/3_Confidence_0.333_Length_1481, SampleTS3_Locus_6340_Transcript_1/1_Confidence_0.000_Length_1077, Sample3_Locus_2152_Transcript_2/3_Confidence_0.333_Length_1481, SampleTS3_Locus_6340_Transcript_1/1_Confidence_0.000_Length_1077, SampleTS2_Locus_8836_Transcript_1/2_Confidence_0.667_Length_1729, SampleTS3_Locus_5316_Transcript_1/2_Confidence_0.750_Length_1843, SampleTS3_Locus_4699_Transcript_6/10_Confidence_0.579_Length_1963, Sample6_Locus_293_Transcript_1/2_Confidence_0.333_Length_875, SampleTS3_Locus_443_Transcript_4/7_Confidence_0.429_Length_1718, SampleTS2_Locus_4114_Transcript_5/7_Confidence_0.267_Length_2080, Sample6_Locus_6489_Transcript_7/13_Confidence_0.200_Length_1232, SampleTS2_Locus_3113_Transcript_1/3_Confidence_0.667_Length_750, SampleTS3_Locus_20806_Transcript_1/1_Confidence_0.000_Length_3106, Sample3_Locus_1003_Transcript_1/3_Confidence_0.750_Length_1416, SampleTS2_Locus_9103_Transcript_1/2_Confidence_0.667_Length_685</p> |
|-----------------------------------------|-----------------|-----------|---------------------------------------------------------------------------------------------------------------------------------------------------------------------------------------------------------------------------------------------------------------------------------------------------------------------------------------------------------------------------------------------------------------------------------------------------------------------------------------------------|----------------------------------------------|-------------------------------------------------------------------------------------------------------------------------------------------------------------------------------------------------------------------------------------------------------------------------------------------------------------------------------------------------------------------------------------------------------------------------------------------------------------------------------------------------------------------------------------------------------------------------------------------------------------------------------------------------------------------------------------------------------------------------------------------------------------------------------------------------------------------------------------------------------------------------------------------------------------------------------------------------------------------------------------------------------------------------------------------------------------------------------------------------------------------------------------------------------------------------------------------------------------------------------------------------------------------------------------------------------------------------------------------------------------------------------------------------------------------------------------------------------------------------------------------------|

|                                             |          |    |                                                                                                                                                                                                                                                                                                                                                                                                                                                             |                                                            |                                                                                                                                                                                                                                                                                                                                                                                                                                                                                                                                                                                                                                                                                                                                                                                                                                                                                                                                                                                                                                                                                                                                                                                                                                                                                                                                                                                                                                                                                                                                 |
|---------------------------------------------|----------|----|-------------------------------------------------------------------------------------------------------------------------------------------------------------------------------------------------------------------------------------------------------------------------------------------------------------------------------------------------------------------------------------------------------------------------------------------------------------|------------------------------------------------------------|---------------------------------------------------------------------------------------------------------------------------------------------------------------------------------------------------------------------------------------------------------------------------------------------------------------------------------------------------------------------------------------------------------------------------------------------------------------------------------------------------------------------------------------------------------------------------------------------------------------------------------------------------------------------------------------------------------------------------------------------------------------------------------------------------------------------------------------------------------------------------------------------------------------------------------------------------------------------------------------------------------------------------------------------------------------------------------------------------------------------------------------------------------------------------------------------------------------------------------------------------------------------------------------------------------------------------------------------------------------------------------------------------------------------------------------------------------------------------------------------------------------------------------|
| <b>Porphyrin and chlorophyll metabolism</b> | map00860 | 14 | ec:3.1.3.73 phosphatase,<br>ec:4.1.1.37 decarboxylase,<br>ec:4.99.1.1 ferrochelatase,<br>ec:1.1.1.294 b reductase,<br>ec:2.1.1.11 protoporphyrin IX methyltransferase, ec:2.5.1.62 synthase,<br>ec:1.14.13.122 oxygenase,<br>ec:5.4.3.8 2,1aminomutase, ec:1.14.13.81 IX monomethyl ester (oxidative) cyclase,<br>ec:6.1.1.17 ligase,<br>ec:2.4.1.17 1naphthol glucuronyltransferase,<br>ec:1.3.3.4 oxidase,<br>ec:1.3.3.3 oxidase,<br>ec:6.6.1.1 chelatase | 1, 2,<br>2, 2,<br>2, 1,<br>1, 1,<br>1, 2,<br>3, 1,<br>2, 1 | SampleTS3_Locus_12636_Transcript_2/2_Confidence_0.333_Length_583,<br>Sample3_Locus_1663_Transcript_2/3_Confidence_0.333_Length_1482,<br>Sample1_Locus_3190_Transcript_1/2_Confidence_0.667_Length_1501,<br>Sample6_Locus_3528_Transcript_1/1_Confidence_0.000_Length_1092,<br>Sample3_Locus_2162_Transcript_1/1_Confidence_0.000_Length_1682,<br>Sample1_Locus_18339_Transcript_2/2_Confidence_0.250_Length_1368,<br>SampleTS1_Locus_13725_Transcript_2/7_Confidence_0.333_Length_1080<br>,<br>SampleTS2_Locus_975_Transcript_12/17_Confidence_0.385_Length_803,<br>Sample3_Locus_1732_Transcript_10/14_Confidence_0.346_Length_743,<br>SampleTS1_Locus_7393_Transcript_3/4_Confidence_0.200_Length_1678,<br>SampleTS3_Locus_17019_Transcript_1/1_Confidence_0.000_Length_1129<br>,<br>SampleTS1_Locus_18338_Transcript_1/3_Confidence_0.667_Length_1638<br>, Sample1_Locus_24667_Transcript_1/1_Confidence_0.000_Length_1383,<br>SampleTS1_Locus_19795_Transcript_1/3_Confidence_0.333_Length_2365<br>,<br>SampleTS1_Locus_12215_Transcript_1/1_Confidence_0.000_Length_1974<br>, Sample6_Locus_9455_Transcript_3/4_Confidence_0.200_Length_1370,<br>SampleTS1_Locus_4303_Transcript_9/11_Confidence_0.167_Length_1464<br>,<br>Sample6_Locus_8395_Transcript_14/17_Confidence_0.508_Length_1568,<br>contig00106,<br>SampleTS1_Locus_5260_Transcript_12/17_Confidence_0.303_Length_120<br>9, Sample3_Locus_4668_Transcript_5/5_Confidence_0.000_Length_1437,<br>Sample1_Locus_26944_Transcript_1/1_Confidence_0.000_Length_1423 |
|---------------------------------------------|----------|----|-------------------------------------------------------------------------------------------------------------------------------------------------------------------------------------------------------------------------------------------------------------------------------------------------------------------------------------------------------------------------------------------------------------------------------------------------------------|------------------------------------------------------------|---------------------------------------------------------------------------------------------------------------------------------------------------------------------------------------------------------------------------------------------------------------------------------------------------------------------------------------------------------------------------------------------------------------------------------------------------------------------------------------------------------------------------------------------------------------------------------------------------------------------------------------------------------------------------------------------------------------------------------------------------------------------------------------------------------------------------------------------------------------------------------------------------------------------------------------------------------------------------------------------------------------------------------------------------------------------------------------------------------------------------------------------------------------------------------------------------------------------------------------------------------------------------------------------------------------------------------------------------------------------------------------------------------------------------------------------------------------------------------------------------------------------------------|

|                             |          |    |                                                                                                                                                                                                                                                                                                                                                                                                                                                                                      |                                                                    |                                                                                                                                                                                                                                                                                                                                                                                                                                                                                                                                                                                                                                                                                                                                                                                                                                                                                                                                                                                                                                                                                                                                                                                                                                                                                                                                                                                                                                              |
|-----------------------------|----------|----|--------------------------------------------------------------------------------------------------------------------------------------------------------------------------------------------------------------------------------------------------------------------------------------------------------------------------------------------------------------------------------------------------------------------------------------------------------------------------------------|--------------------------------------------------------------------|----------------------------------------------------------------------------------------------------------------------------------------------------------------------------------------------------------------------------------------------------------------------------------------------------------------------------------------------------------------------------------------------------------------------------------------------------------------------------------------------------------------------------------------------------------------------------------------------------------------------------------------------------------------------------------------------------------------------------------------------------------------------------------------------------------------------------------------------------------------------------------------------------------------------------------------------------------------------------------------------------------------------------------------------------------------------------------------------------------------------------------------------------------------------------------------------------------------------------------------------------------------------------------------------------------------------------------------------------------------------------------------------------------------------------------------------|
| <b>Butanoate metabolism</b> | map00650 | 14 | ec:2.6.1.19<br>transaminase,<br>ec:1.3.5.1<br>dehydrogenase,<br>ec:2.2.1.6<br>synthase,<br>ec:5.1.2.3<br>epimerase,<br>ec:1.2.1.10<br>dehydrogenase<br>(acetylating),<br>ec:4.1.1.15<br>decarboxylase,<br>ec:2.3.1.54<br>Cacetyltransfer<br>ase,<br>ec:1.1.1.157<br>dehydrogenase,<br>ec:2.8.3.8<br>CoAtransferase,<br>ec:4.2.1.17<br>hydratase,<br>ec:2.3.1.9<br>Cacetyltransfer<br>ase, ec:1.1.1.36<br>reductase,<br>ec:1.1.1.35<br>dehydrogenase,<br>ec:1.1.99.2<br>dehydrogenase | 1, 1,<br>1, 1,<br>2, 1,<br>3, 1,<br>1, 2,<br>1, 1,<br>3, 1<br>3, 1 | SampleTS1_Locus_13173_Transcript_7/8_Confidence_0.190_Length_747,<br>SampleTS2_Locus_54_Transcript_4/10_Confidence_0.083_Length_1374,<br>Sample3_Locus_4596_Transcript_3/6_Confidence_0.400_Length_1157,<br>SampleTS1_Locus_789_Transcript_9/11_Confidence_0.238_Length_2300,<br>SampleTS3_Locus_400_Transcript_6/29_Confidence_0.422_Length_2479,<br>Sample6_Locus_1524_Transcript_26/30_Confidence_0.185_Length_3215,<br>SampleTS3_Locus_5084_Transcript_15/17_Confidence_0.206_Length_175<br>1, Sample6_Locus_961_Transcript_2/3_Confidence_0.250_Length_1478,<br>Sample1_Locus_27983_Transcript_6/13_Confidence_0.294_Length_763,<br>SampleTS2_Locus_20366_Transcript_1/7_Confidence_0.273_Length_670,<br>SampleTS3_Locus_1827_Transcript_3/3_Confidence_0.000_Length_1033,<br>SampleTS2_Locus_1750_Transcript_17/20_Confidence_0.182_Length_156<br>8,<br>SampleTS1_Locus_789_Transcript_9/11_Confidence_0.238_Length_2300,<br>Sample3_Locus_5282_Transcript_2/7_Confidence_0.700_Length_1266,<br>SampleTS2_Locus_1750_Transcript_17/20_Confidence_0.182_Length_156<br>8,<br>SampleTS3_Locus_11808_Transcript_9/11_Confidence_0.565_Length_100<br>6,<br>SampleTS1_Locus_789_Transcript_9/11_Confidence_0.238_Length_2300,<br>SampleTS3_Locus_1827_Transcript_3/3_Confidence_0.000_Length_1033,<br>SampleTS3_Locus_11808_Transcript_9/11_Confidence_0.565_Length_100<br>6, Sample6_Locus_3300_Transcript_2/5_Confidence_0.700_Length_1810 |
|-----------------------------|----------|----|--------------------------------------------------------------------------------------------------------------------------------------------------------------------------------------------------------------------------------------------------------------------------------------------------------------------------------------------------------------------------------------------------------------------------------------------------------------------------------------|--------------------------------------------------------------------|----------------------------------------------------------------------------------------------------------------------------------------------------------------------------------------------------------------------------------------------------------------------------------------------------------------------------------------------------------------------------------------------------------------------------------------------------------------------------------------------------------------------------------------------------------------------------------------------------------------------------------------------------------------------------------------------------------------------------------------------------------------------------------------------------------------------------------------------------------------------------------------------------------------------------------------------------------------------------------------------------------------------------------------------------------------------------------------------------------------------------------------------------------------------------------------------------------------------------------------------------------------------------------------------------------------------------------------------------------------------------------------------------------------------------------------------|

|                                 |          |    |                                                                                                                                                                                                                                                                                                                                                                                                                               |                                                            |                                                                                                                                                                                                                                                                                                                                                                                                                                                                                                                                                                                                                                                                                                                                                                                                                                                                                                                                                                                                                                                                                                                                                                                                                                                                                                                                                                                                                                                                                                                                                                                                                                                                                             |
|---------------------------------|----------|----|-------------------------------------------------------------------------------------------------------------------------------------------------------------------------------------------------------------------------------------------------------------------------------------------------------------------------------------------------------------------------------------------------------------------------------|------------------------------------------------------------|---------------------------------------------------------------------------------------------------------------------------------------------------------------------------------------------------------------------------------------------------------------------------------------------------------------------------------------------------------------------------------------------------------------------------------------------------------------------------------------------------------------------------------------------------------------------------------------------------------------------------------------------------------------------------------------------------------------------------------------------------------------------------------------------------------------------------------------------------------------------------------------------------------------------------------------------------------------------------------------------------------------------------------------------------------------------------------------------------------------------------------------------------------------------------------------------------------------------------------------------------------------------------------------------------------------------------------------------------------------------------------------------------------------------------------------------------------------------------------------------------------------------------------------------------------------------------------------------------------------------------------------------------------------------------------------------|
| <b>Phenylalanine metabolism</b> | map00360 | 14 | ec:1.4.3.2 oxidase,<br>ec:2.6.1.57 transaminase,<br>ec:2.6.1.58 transaminase,<br>ec:1.13.11.27 dioxygenase,<br>ec:1.2.1.10 dehydrogenase (acetylating),<br>ec:1.1.1.157 dehydrogenase,<br>ec:2.6.1.5 transaminase,<br>ec:2.6.1.9 transaminase,<br>ec:2.6.1.1 transaminase,<br>ec:4.2.1.17 hydratase,<br>ec:1.2.1.5 dehydrogenase [NAD(P)+],<br>ec:1.14.16.1 4monooxygenase,<br>ec:3.5.1.4 acylamidase,<br>ec:1.4.3.21 oxidase | 1, 2,<br>1, 3,<br>2, 1,<br>2, 2,<br>3, 2,<br>1, 1,<br>2, 1 | SampleTS1_Locus_1041_Transcript_1/5_Confidence_0.400_Length_2190,<br>Sample1_Locus_26802_Transcript_1/2_Confidence_0.667_Length_439,<br>Sample6_Locus_13664_Transcript_1/2_Confidence_0.333_Length_862,<br>Sample6_Locus_22798_Transcript_3/3_Confidence_0.250_Length_666,<br>SampleTS1_Locus_605_Transcript_11/25_Confidence_0.258_Length_787,<br>SampleTS2_Locus_361_Transcript_3/4_Confidence_0.750_Length_304,<br>SampleTS1_Locus_605_Transcript_3/25_Confidence_0.161_Length_805,<br>SampleTS3_Locus_400_Transcript_6/29_Confidence_0.422_Length_2479,<br>Sample6_Locus_1524_Transcript_26/30_Confidence_0.185_Length_3215,<br>SampleTS3_Locus_1827_Transcript_3/3_Confidence_0.000_Length_1033,<br>Sample1_Locus_26802_Transcript_1/2_Confidence_0.667_Length_439,<br>Sample6_Locus_13664_Transcript_1/2_Confidence_0.333_Length_862,<br>Sample1_Locus_26802_Transcript_1/2_Confidence_0.667_Length_439,<br>Sample6_Locus_13664_Transcript_1/2_Confidence_0.333_Length_862,<br>Sample1_Locus_26802_Transcript_1/2_Confidence_0.667_Length_439,<br>Sample6_Locus_13664_Transcript_1/2_Confidence_0.333_Length_862,<br>SampleTS2_Locus_6646_Transcript_2/2_Confidence_0.333_Length_1520,<br>SampleTS1_Locus_789_Transcript_9/11_Confidence_0.238_Length_2300,<br>Sample3_Locus_5282_Transcript_2/7_Confidence_0.700_Length_1266,<br>SampleTS1_Locus_5373_Transcript_26/33_Confidence_0.065_Length_1620,<br>Sample3_Locus_2321_Transcript_7/9_Confidence_0.414_Length_1007,<br>Sample6_Locus_14763_Transcript_11/12_Confidence_0.182_Length_1117,<br>Sample6_Locus_19655_Transcript_1/3_Confidence_0.667_Length_978,<br>Sample1_Locus_4359_Transcript_11/14_Confidence_0.314_Length_2540 |
|---------------------------------|----------|----|-------------------------------------------------------------------------------------------------------------------------------------------------------------------------------------------------------------------------------------------------------------------------------------------------------------------------------------------------------------------------------------------------------------------------------|------------------------------------------------------------|---------------------------------------------------------------------------------------------------------------------------------------------------------------------------------------------------------------------------------------------------------------------------------------------------------------------------------------------------------------------------------------------------------------------------------------------------------------------------------------------------------------------------------------------------------------------------------------------------------------------------------------------------------------------------------------------------------------------------------------------------------------------------------------------------------------------------------------------------------------------------------------------------------------------------------------------------------------------------------------------------------------------------------------------------------------------------------------------------------------------------------------------------------------------------------------------------------------------------------------------------------------------------------------------------------------------------------------------------------------------------------------------------------------------------------------------------------------------------------------------------------------------------------------------------------------------------------------------------------------------------------------------------------------------------------------------|

|                              |          |    |                                                                                                                                                                                                                                                                                                                                                                     |                                       |                                                                                                                                                                                                                                                                                                                                                                                                                                                                                                                                                                                                                                                                                                                                                                                                                                                                                                                                                                                                                                                                                                                                                                                                                                                                                                                                                                                                                                                                                                                                                                                                                                                     |
|------------------------------|----------|----|---------------------------------------------------------------------------------------------------------------------------------------------------------------------------------------------------------------------------------------------------------------------------------------------------------------------------------------------------------------------|---------------------------------------|-----------------------------------------------------------------------------------------------------------------------------------------------------------------------------------------------------------------------------------------------------------------------------------------------------------------------------------------------------------------------------------------------------------------------------------------------------------------------------------------------------------------------------------------------------------------------------------------------------------------------------------------------------------------------------------------------------------------------------------------------------------------------------------------------------------------------------------------------------------------------------------------------------------------------------------------------------------------------------------------------------------------------------------------------------------------------------------------------------------------------------------------------------------------------------------------------------------------------------------------------------------------------------------------------------------------------------------------------------------------------------------------------------------------------------------------------------------------------------------------------------------------------------------------------------------------------------------------------------------------------------------------------------|
| <b>Tryptophan metabolism</b> | map00380 | 13 | ec:1.4.3.2 oxidase, ec:1.11.1.6 equilase, ec:3.5.5.1 acetonitrilase, ec:4.2.1.84 hydratase, ec:2.6.1.7 transaminase, ec:4.2.1.17 hydratase, ec:1.2.1.3 dehydrogenase (NAD+), ec:2.3.1.9 Cacetyltransferase, ec:1.1.1.35 dehydrogenase, ec:3.2.1.147 myrosinase, ec:1.2.4.2 dehydrogenase (succinyltransfering), ec:1.14.16.4 5monooxygenase, ec:3.5.1.4 acylamidase | 1, 3, 1, 1, 1, 2, 6, 1, 3, 1, 1, 1, 2 | SampleTS1_Locus_1041_Transcript_1/5_Confidence_0.400_Length_2190, SampleTS2_Locus_11692_Transcript_2/7_Confidence_0.333_Length_2130 , SampleTS2_Locus_760_Transcript_7/10_Confidence_0.186_Length_1031, Sample6_Locus_13592_Transcript_5/5_Confidence_0.250_Length_879, Sample3_Locus_27182_Transcript_2/3_Confidence_0.250_Length_1010, Sample3_Locus_12929_Transcript_1/1_Confidence_0.000_Length_1898, Sample6_Locus_22798_Transcript_3/3_Confidence_0.250_Length_666, SampleTS1_Locus_789_Transcript_9/11_Confidence_0.238_Length_2300, Sample3_Locus_5282_Transcript_2/7_Confidence_0.700_Length_1266, SampleTS3_Locus_23038_Transcript_2/3_Confidence_0.333_Length_1864 , SampleTS2_Locus_4874_Transcript_6/12_Confidence_0.158_Length_1042 , Sample3_Locus_23176_Transcript_2/3_Confidence_0.333_Length_1282, SampleTS1_Locus_5373_Transcript_26/33_Confidence_0.065_Length_162 0, Sample6_Locus_12695_Transcript_1/2_Confidence_0.333_Length_2218, SampleTS3_Locus_23264_Transcript_1/3_Confidence_0.500_Length_845, SampleTS2_Locus_1750_Transcript_17/20_Confidence_0.182_Length_156 8, SampleTS1_Locus_789_Transcript_9/11_Confidence_0.238_Length_2300, SampleTS3_Locus_1827_Transcript_3/3_Confidence_0.000_Length_1033, SampleTS3_Locus_11808_Transcript_9/11_Confidence_0.565_Length_100 6, SampleTS2_Locus_9286_Transcript_1/1_Confidence_0.000_Length_2119, SampleTS3_Locus_20806_Transcript_1/1_Confidence_0.000_Length_3106 , Sample3_Locus_2321_Transcript_7/9_Confidence_0.414_Length_1007, Sample6_Locus_14763_Transcript_11/12_Confidence_0.182_Length_1117 , Sample6_Locus_19655_Transcript_1/3_Confidence_0.667_Length_978 |
|------------------------------|----------|----|---------------------------------------------------------------------------------------------------------------------------------------------------------------------------------------------------------------------------------------------------------------------------------------------------------------------------------------------------------------------|---------------------------------------|-----------------------------------------------------------------------------------------------------------------------------------------------------------------------------------------------------------------------------------------------------------------------------------------------------------------------------------------------------------------------------------------------------------------------------------------------------------------------------------------------------------------------------------------------------------------------------------------------------------------------------------------------------------------------------------------------------------------------------------------------------------------------------------------------------------------------------------------------------------------------------------------------------------------------------------------------------------------------------------------------------------------------------------------------------------------------------------------------------------------------------------------------------------------------------------------------------------------------------------------------------------------------------------------------------------------------------------------------------------------------------------------------------------------------------------------------------------------------------------------------------------------------------------------------------------------------------------------------------------------------------------------------------|

|                                        |          |    |                                                                                                                                                                                                                                                                                                                                                                                                                                                |                                                         |                                                                                                                                                                                                                                                                                                                                                                                                                                                                                                                                                                                                                                                                                                                                                                                                                                                                                                                                                                                                                                                                                                                                                                                                                                                                                                                                                                                                          |
|----------------------------------------|----------|----|------------------------------------------------------------------------------------------------------------------------------------------------------------------------------------------------------------------------------------------------------------------------------------------------------------------------------------------------------------------------------------------------------------------------------------------------|---------------------------------------------------------|----------------------------------------------------------------------------------------------------------------------------------------------------------------------------------------------------------------------------------------------------------------------------------------------------------------------------------------------------------------------------------------------------------------------------------------------------------------------------------------------------------------------------------------------------------------------------------------------------------------------------------------------------------------------------------------------------------------------------------------------------------------------------------------------------------------------------------------------------------------------------------------------------------------------------------------------------------------------------------------------------------------------------------------------------------------------------------------------------------------------------------------------------------------------------------------------------------------------------------------------------------------------------------------------------------------------------------------------------------------------------------------------------------|
| <b>Fructose and mannose metabolism</b> | map00051 | 13 | ec:2.7.1.105 phosphofructokinase 2,<br>ec:4.1.2.13 aldolase,<br>ec:3.1.3.46 2phosphatase,<br>ec:2.7.1.1 hexokinase type IV glucokinase,<br>ec:2.7.1.4 fructokinase (phosphorylating), ec:3.1.3.11 hexose diphosphatase,<br>ec:3.6.1.21 diphosphatase,<br>ec:5.3.1.6 isomerase,<br>ec:2.7.7.22 guanylyltransferase (GDP),<br>ec:1.1.1.67 2dehydrogenase, ec:5.4.2.8 mannose phosphomutase,<br>ec:1.1.1.14 2dehydrogenase, ec:1.1.1.21 reductase | 1, 2,<br>1, 1,<br>1, 2,<br>4, 2,<br>1, 1,<br>1, 1,<br>2 | Sample6_Locus_11496_Transcript_4/7_Confidence_0.250_Length_1518,<br>Sample3_Locus_324_Transcript_3/17_Confidence_0.222_Length_1711,<br>Sample6_Locus_28252_Transcript_2/3_Confidence_0.500_Length_808,<br>Sample6_Locus_11496_Transcript_4/7_Confidence_0.250_Length_1518,<br>Sample6_Locus_5095_Transcript_5/8_Confidence_0.300_Length_1241,<br>Sample6_Locus_5095_Transcript_5/8_Confidence_0.300_Length_1241,<br>Sample3_Locus_10262_Transcript_4/5_Confidence_0.062_Length_1337,<br>Sample6_Locus_2283_Transcript_7/17_Confidence_0.225_Length_1818,<br>Sample3_Locus_345_Transcript_6/8_Confidence_0.455_Length_1801,<br>SampleTS2_Locus_5310_Transcript_3/15_Confidence_0.167_Length_1115,<br>Sample3_Locus_734_Transcript_8/12_Confidence_0.176_Length_1222,<br>SampleTS3_Locus_5794_Transcript_5/6_Confidence_0.125_Length_1722,<br>SampleTS1_Locus_27877_Transcript_2/3_Confidence_0.333_Length_987,<br>Sample3_Locus_9475_Transcript_2/2_Confidence_0.000_Length_1080,<br>Sample3_Locus_982_Transcript_1/1_Confidence_0.000_Length_2070,<br>SampleTS3_Locus_26045_Transcript_2/2_Confidence_0.000_Length_444,<br>Sample1_Locus_10139_Transcript_1/10_Confidence_0.538_Length_1144,<br>SampleTS2_Locus_54_Transcript_4/10_Confidence_0.083_Length_1374,<br>Sample6_Locus_15547_Transcript_5/8_Confidence_0.545_Length_1332,<br>SampleTS3_Locus_8149_Transcript_4/10_Confidence_0.118_Length_927 |
|----------------------------------------|----------|----|------------------------------------------------------------------------------------------------------------------------------------------------------------------------------------------------------------------------------------------------------------------------------------------------------------------------------------------------------------------------------------------------------------------------------------------------|---------------------------------------------------------|----------------------------------------------------------------------------------------------------------------------------------------------------------------------------------------------------------------------------------------------------------------------------------------------------------------------------------------------------------------------------------------------------------------------------------------------------------------------------------------------------------------------------------------------------------------------------------------------------------------------------------------------------------------------------------------------------------------------------------------------------------------------------------------------------------------------------------------------------------------------------------------------------------------------------------------------------------------------------------------------------------------------------------------------------------------------------------------------------------------------------------------------------------------------------------------------------------------------------------------------------------------------------------------------------------------------------------------------------------------------------------------------------------|

|                           |          |    |                                                                                                                                                                                                                                                                                                                                                                                                                                     |                                                         |                                                                                                                                                                                                                                                                                                                                                                                                                                                                                                                                                                                                                                                                                                                                                                                                                                                                                                                                                                                                                                                                                                                                                                                                                                                                               |
|---------------------------|----------|----|-------------------------------------------------------------------------------------------------------------------------------------------------------------------------------------------------------------------------------------------------------------------------------------------------------------------------------------------------------------------------------------------------------------------------------------|---------------------------------------------------------|-------------------------------------------------------------------------------------------------------------------------------------------------------------------------------------------------------------------------------------------------------------------------------------------------------------------------------------------------------------------------------------------------------------------------------------------------------------------------------------------------------------------------------------------------------------------------------------------------------------------------------------------------------------------------------------------------------------------------------------------------------------------------------------------------------------------------------------------------------------------------------------------------------------------------------------------------------------------------------------------------------------------------------------------------------------------------------------------------------------------------------------------------------------------------------------------------------------------------------------------------------------------------------|
| <b>Methane metabolism</b> | map00680 | 13 | ec:2.1.2.1<br>hydroxymethyltransferase,<br>ec:4.1.2.13<br>aldolase,<br>ec:4.1.1.31<br>carboxylase,<br>ec:2.6.1.52<br>transaminase,<br>ec:1.2.1.46<br>dehydrogenase,<br>ec:2.6.1.45<br>transaminase,<br>ec:6.2.1.1<br>ligase,<br>ec:1.1.1.244<br>dehydrogenase,<br>ec:3.1.3.11<br>hexose diphosphatase,<br>ec:1.1.1.284<br>dehydrogenase,<br>ec:3.1.3.3<br>phosphatase,<br>ec:4.2.1.11<br>hydratase,<br>ec:1.1.1.37<br>dehydrogenase | 2, 2,<br>1, 1,<br>2, 1,<br>1, 1,<br>2, 2,<br>1, 1,<br>1 | Sample1_Locus_3932_Transcript_7/11_Confidence_0.400_Length_1725,<br>SampleTS1_Locus_10618_Transcript_3/4_Confidence_0.400_Length_1517<br>, Sample3_Locus_324_Transcript_3/17_Confidence_0.222_Length_1711,<br>Sample6_Locus_28252_Transcript_2/3_Confidence_0.500_Length_808,<br>Sample3_Locus_7378_Transcript_3/6_Confidence_0.417_Length_3416,<br>Sample1_Locus_9264_Transcript_1/1_Confidence_0.000_Length_1678,<br>SampleTS2_Locus_4874_Transcript_6/12_Confidence_0.158_Length_1042<br>,<br>SampleTS3_Locus_23264_Transcript_1/3_Confidence_0.500_Length_845,<br>Sample6_Locus_15604_Transcript_2/4_Confidence_0.400_Length_1416,<br>SampleTS3_Locus_456_Transcript_2/6_Confidence_0.200_Length_2075,<br>SampleTS2_Locus_263_Transcript_1/3_Confidence_0.250_Length_2184,<br>Sample3_Locus_10262_Transcript_4/5_Confidence_0.062_Length_1337,<br>Sample6_Locus_2283_Transcript_7/17_Confidence_0.225_Length_1818,<br>SampleTS2_Locus_4874_Transcript_6/12_Confidence_0.158_Length_1042<br>,<br>SampleTS3_Locus_23264_Transcript_1/3_Confidence_0.500_Length_845,<br>Sample1_Locus_18291_Transcript_1/1_Confidence_0.000_Length_647,<br>SampleTS1_Locus_3608_Transcript_5/7_Confidence_0.222_Length_1514,<br>Sample6_Locus_293_Transcript_1/2_Confidence_0.333_Length_875 |
|---------------------------|----------|----|-------------------------------------------------------------------------------------------------------------------------------------------------------------------------------------------------------------------------------------------------------------------------------------------------------------------------------------------------------------------------------------------------------------------------------------|---------------------------------------------------------|-------------------------------------------------------------------------------------------------------------------------------------------------------------------------------------------------------------------------------------------------------------------------------------------------------------------------------------------------------------------------------------------------------------------------------------------------------------------------------------------------------------------------------------------------------------------------------------------------------------------------------------------------------------------------------------------------------------------------------------------------------------------------------------------------------------------------------------------------------------------------------------------------------------------------------------------------------------------------------------------------------------------------------------------------------------------------------------------------------------------------------------------------------------------------------------------------------------------------------------------------------------------------------|

|                               |          |    |                                                                                                                                                                                                                                                                                                                                                                                                                        |                                       |                                                                                                                                                                                                                                                                                                                                                                                                                                                                                                                                                                                                                                                                                                                                                                                                                                                                                                                                                                                                                                                                                                                                                                                                                                                                                                                                                                                                                                                                                                                                                                                                                                                                                                                                                                                                                                                                                                                                                                                                                                                                                                                               |
|-------------------------------|----------|----|------------------------------------------------------------------------------------------------------------------------------------------------------------------------------------------------------------------------------------------------------------------------------------------------------------------------------------------------------------------------------------------------------------------------|---------------------------------------|-------------------------------------------------------------------------------------------------------------------------------------------------------------------------------------------------------------------------------------------------------------------------------------------------------------------------------------------------------------------------------------------------------------------------------------------------------------------------------------------------------------------------------------------------------------------------------------------------------------------------------------------------------------------------------------------------------------------------------------------------------------------------------------------------------------------------------------------------------------------------------------------------------------------------------------------------------------------------------------------------------------------------------------------------------------------------------------------------------------------------------------------------------------------------------------------------------------------------------------------------------------------------------------------------------------------------------------------------------------------------------------------------------------------------------------------------------------------------------------------------------------------------------------------------------------------------------------------------------------------------------------------------------------------------------------------------------------------------------------------------------------------------------------------------------------------------------------------------------------------------------------------------------------------------------------------------------------------------------------------------------------------------------------------------------------------------------------------------------------------------------|
| <b>Glutathione metabolism</b> | map00480 | 13 | ec:3.5.2.9 (ATPhydrolysing), ec:1.1.1.1.9 peroxidase, ec:1.1.7.4.1 reductase, ec:2.5.1.18 transferase, ec:4.1.1.17 decarboxylase, ec:1.8.1.7 reductase, ec:1.1.1.44 dehydrogenase (NADP+dependent, decarboxylating), ec:1.1.1.43 2dehydrogenase, ec:2.3.2.2 glutamyl transpeptidase, ec:1.1.1.49 dehydrogenase (NADP+), ec:1.1.1.11 peroxidase, ec:1.1.1.12 glutathione peroxidase, ec:1.1.1.15 thioredoxin peroxidase | 1, 6, 1, 6, 2, 3, 2, 1, 1, 2, 2, 1, 4 | Sample3_Locus_15598_Transcript_4/6_Confidence_0.286_Length_1365, SampleTS1_Locus_6640_Transcript_2/7_Confidence_0.357_Length_1361, SampleTS3_Locus_2808_Transcript_2/4_Confidence_0.333_Length_770, Sample6_Locus_795_Transcript_19/29_Confidence_0.175_Length_1113, Sample3_Locus_2715_Transcript_4/6_Confidence_0.286_Length_835, Sample1_Locus_18818_Transcript_1/1_Confidence_0.000_Length_983, Sample6_Locus_1113_Transcript_3/14_Confidence_0.211_Length_520, SampleTS3_Locus_11402_Transcript_2/3_Confidence_0.333_Length_597, SampleTS1_Locus_6640_Transcript_2/7_Confidence_0.357_Length_1361, Sample6_Locus_795_Transcript_19/29_Confidence_0.175_Length_1113, Unigene1242_Br_gene19, SampleTS2_Locus_4937_Transcript_4/7_Confidence_0.444_Length_827, Sample3_Locus_2715_Transcript_4/6_Confidence_0.286_Length_835, SampleTS1_Locus_23227_Transcript_3/3_Confidence_0.000_Length_1280, Sample6_Locus_7028_Transcript_1/3_Confidence_0.750_Length_1269, SampleTS1_Locus_23304_Transcript_2/3_Confidence_0.333_Length_2324, SampleTS2_Locus_3616_Transcript_1/2_Confidence_0.333_Length_1862, Sample6_Locus_711_Transcript_5/8_Confidence_0.500_Length_1354, SampleTS1_Locus_5852_Transcript_11/12_Confidence_0.615_Length_1704, Sample6_Locus_10552_Transcript_5/5_Confidence_0.000_Length_1013, SampleTS1_Locus_3938_Transcript_9/14_Confidence_0.467_Length_2040, SampleTS1_Locus_3938_Transcript_9/14_Confidence_0.467_Length_2040, Sample1_Locus_19449_Transcript_1/1_Confidence_0.000_Length_1704, SampleTS1_Locus_4380_Transcript_8/12_Confidence_0.400_Length_2044, SampleTS3_Locus_2991_Transcript_5/8_Confidence_0.400_Length_1799, SampleTS1_Locus_6669_Transcript_3/3_Confidence_0.200_Length_979, SampleTS1_Locus_1282_Transcript_9/25_Confidence_0.318_Length_1204, Sample1_Locus_18818_Transcript_1/1_Confidence_0.000_Length_983, SampleTS2_Locus_21396_Transcript_1/2_Confidence_0.667_Length_780, SampleTS3_Locus_2808_Transcript_2/4_Confidence_0.333_Length_770, Sample3_Locus_11502_Transcript_4/7_Confidence_0.636_Length_850, Sample3_Locus_13267_Transcript_2/3_Confidence_0.667_Length_841 |
|-------------------------------|----------|----|------------------------------------------------------------------------------------------------------------------------------------------------------------------------------------------------------------------------------------------------------------------------------------------------------------------------------------------------------------------------------------------------------------------------|---------------------------------------|-------------------------------------------------------------------------------------------------------------------------------------------------------------------------------------------------------------------------------------------------------------------------------------------------------------------------------------------------------------------------------------------------------------------------------------------------------------------------------------------------------------------------------------------------------------------------------------------------------------------------------------------------------------------------------------------------------------------------------------------------------------------------------------------------------------------------------------------------------------------------------------------------------------------------------------------------------------------------------------------------------------------------------------------------------------------------------------------------------------------------------------------------------------------------------------------------------------------------------------------------------------------------------------------------------------------------------------------------------------------------------------------------------------------------------------------------------------------------------------------------------------------------------------------------------------------------------------------------------------------------------------------------------------------------------------------------------------------------------------------------------------------------------------------------------------------------------------------------------------------------------------------------------------------------------------------------------------------------------------------------------------------------------------------------------------------------------------------------------------------------------|



|                      |          |    |                                                                                                                                                                                                                                                                                                                                                                                                                                                                                                                                                 |                                                         |                                                                                                                                                                                                                                                                                                                                                                                                                                                                                                                                                                                                                                                                                                                                                                                                                                                                                                                                                                                                                                                                                                                                                                                                                                                                                                                                                                                                                                                                                                                                                                                                                              |
|----------------------|----------|----|-------------------------------------------------------------------------------------------------------------------------------------------------------------------------------------------------------------------------------------------------------------------------------------------------------------------------------------------------------------------------------------------------------------------------------------------------------------------------------------------------------------------------------------------------|---------------------------------------------------------|------------------------------------------------------------------------------------------------------------------------------------------------------------------------------------------------------------------------------------------------------------------------------------------------------------------------------------------------------------------------------------------------------------------------------------------------------------------------------------------------------------------------------------------------------------------------------------------------------------------------------------------------------------------------------------------------------------------------------------------------------------------------------------------------------------------------------------------------------------------------------------------------------------------------------------------------------------------------------------------------------------------------------------------------------------------------------------------------------------------------------------------------------------------------------------------------------------------------------------------------------------------------------------------------------------------------------------------------------------------------------------------------------------------------------------------------------------------------------------------------------------------------------------------------------------------------------------------------------------------------------|
| Galactose metabolism | map00052 | 13 | ec:2.7.1.2<br>glucokinase<br>(phosphorylatin<br>g), ec:2.7.1.1<br>hexokinase type<br>IV glucokinase,<br>ec:2.7.1.6<br>galactokinase<br>(phosphorylatin<br>g), ec:2.4.1.123<br>3alphagalactosy<br>ltransferase,<br>ec:5.1.3.3<br>1epimerase,<br>ec:5.1.3.2<br>4epimerase,<br>ec:2.7.7.9<br>uridylyltransfer<br>ase, ec:2.7.7.64<br>uridylyltransfer<br>ase, ec:2.7.7.10<br>uridylyltransfer<br>ase, ec:2.4.1.82<br>galactosyltransf<br>erese,<br>ec:3.2.1.22<br>melibiase,<br>ec:3.2.1.23<br>lactase<br>(ambiguous),<br>ec:1.1.1.21<br>reductase | 1, 1,<br>2, 1,<br>1, 1,<br>5, 5,<br>1, 1,<br>1, 1,<br>2 | Sample6_Locus_5095_Transcript_5/8_Confidence_0.300_Length_1241,<br>Sample6_Locus_5095_Transcript_5/8_Confidence_0.300_Length_1241,<br>Sample3_Locus_7188_Transcript_3/12_Confidence_0.615_Length_971,<br>Sample3_Locus_7508_Transcript_1/2_Confidence_0.333_Length_994,<br>SampleTS3_Locus_5338_Transcript_2/2_Confidence_0.000_Length_543,<br>Sample3_Locus_10443_Transcript_10/11_Confidence_0.700_Length_2690<br>, SampleTS2_Locus_4938_Transcript_4/9_Confidence_0.273_Length_771,<br>SampleTS3_Locus_2330_Transcript_4/4_Confidence_0.000_Length_1686,<br>SampleTS1_Locus_16292_Transcript_4/5_Confidence_0.600_Length_1341<br>, Sample3_Locus_4208_Transcript_8/15_Confidence_0.091_Length_2117,<br>Sample3_Locus_40_Transcript_1/1_Confidence_0.000_Length_1702,<br>Sample3_Locus_14770_Transcript_1/1_Confidence_0.000_Length_1819,<br>SampleTS3_Locus_2330_Transcript_4/4_Confidence_0.000_Length_1686,<br>SampleTS1_Locus_16292_Transcript_4/5_Confidence_0.600_Length_1341<br>, Sample3_Locus_4208_Transcript_8/15_Confidence_0.091_Length_2117,<br>Sample3_Locus_40_Transcript_1/1_Confidence_0.000_Length_1702,<br>Sample3_Locus_14770_Transcript_1/1_Confidence_0.000_Length_1819,<br>SampleTS3_Locus_2330_Transcript_4/4_Confidence_0.000_Length_1686,<br>SampleTS2_Locus_3316_Transcript_5/7_Confidence_0.211_Length_3110,<br>SampleTS2_Locus_3316_Transcript_5/7_Confidence_0.211_Length_3110,<br>SampleTS2_Locus_9286_Transcript_1/1_Confidence_0.000_Length_2119,<br>Sample6_Locus_15547_Transcript_5/8_Confidence_0.545_Length_1332,<br>SampleTS3_Locus_8149_Transcript_4/10_Confidence_0.118_Length_927 |
|----------------------|----------|----|-------------------------------------------------------------------------------------------------------------------------------------------------------------------------------------------------------------------------------------------------------------------------------------------------------------------------------------------------------------------------------------------------------------------------------------------------------------------------------------------------------------------------------------------------|---------------------------------------------------------|------------------------------------------------------------------------------------------------------------------------------------------------------------------------------------------------------------------------------------------------------------------------------------------------------------------------------------------------------------------------------------------------------------------------------------------------------------------------------------------------------------------------------------------------------------------------------------------------------------------------------------------------------------------------------------------------------------------------------------------------------------------------------------------------------------------------------------------------------------------------------------------------------------------------------------------------------------------------------------------------------------------------------------------------------------------------------------------------------------------------------------------------------------------------------------------------------------------------------------------------------------------------------------------------------------------------------------------------------------------------------------------------------------------------------------------------------------------------------------------------------------------------------------------------------------------------------------------------------------------------------|

|                               |          |    |                                                                                                                                                                                                                                                                                                                |                                    |                                                                                                                                                                                                                                                                                                                                                                                                                                                                                                                                                                                                                                                                                                                                                                                                                                                                                                                                                                                                                                                                                                                                                                                                                                                                                                                                                                                                                                                                                                                                                                                                                                                                                                                                                                                                                                                                                                                                |
|-------------------------------|----------|----|----------------------------------------------------------------------------------------------------------------------------------------------------------------------------------------------------------------------------------------------------------------------------------------------------------------|------------------------------------|--------------------------------------------------------------------------------------------------------------------------------------------------------------------------------------------------------------------------------------------------------------------------------------------------------------------------------------------------------------------------------------------------------------------------------------------------------------------------------------------------------------------------------------------------------------------------------------------------------------------------------------------------------------------------------------------------------------------------------------------------------------------------------------------------------------------------------------------------------------------------------------------------------------------------------------------------------------------------------------------------------------------------------------------------------------------------------------------------------------------------------------------------------------------------------------------------------------------------------------------------------------------------------------------------------------------------------------------------------------------------------------------------------------------------------------------------------------------------------------------------------------------------------------------------------------------------------------------------------------------------------------------------------------------------------------------------------------------------------------------------------------------------------------------------------------------------------------------------------------------------------------------------------------------------------|
| <b>Fatty acid degradation</b> | map00071 | 12 | ec:5.1.2.3 epimerase, ec:6.2.1.3 ligase, ec:2.3.1.16 Cacyltransferase, ec:4.2.1.74 hydratase, ec:1.1.1.1 dehydrogenase, ec:5.3.3.8 isomerase, ec:4.2.1.17 hydratase, ec:1.1.1.211 dehydrogenase, ec:1.2.1.3 dehydrogenase (NAD+), ec:2.3.1.9 Cacetyltransferase, ec:1.1.1.35 dehydrogenase, ec:1.3.3.6 oxidase | 1, 4, 1, 1, 5, 1, 2, 1, 6, 1, 3, 2 | SampleTS1_Locus_789_Transcript_9/11_Confidence_0.238_Length_2300, SampleTS1_Locus_369_Transcript_24/52_Confidence_0.312_Length_2199, SampleTS1_Locus_24343_Transcript_2/3_Confidence_0.333_Length_1375, Sample1_Locus_5442_Transcript_10/12_Confidence_0.091_Length_2073, Sample3_Locus_31478_Transcript_1/1_Confidence_0.333_Length_620, SampleTS2_Locus_1750_Transcript_17/20_Confidence_0.182_Length_1568, SampleTS1_Locus_789_Transcript_9/11_Confidence_0.238_Length_2300, SampleTS2_Locus_4874_Transcript_6/12_Confidence_0.158_Length_1042, Sample6_Locus_1524_Transcript_26/30_Confidence_0.185_Length_3215, SampleTS2_Locus_263_Transcript_1/3_Confidence_0.250_Length_2184, SampleTS3_Locus_400_Transcript_6/29_Confidence_0.422_Length_2479, SampleTS3_Locus_23264_Transcript_1/3_Confidence_0.500_Length_845, SampleTS1_Locus_789_Transcript_9/11_Confidence_0.238_Length_2300, SampleTS1_Locus_789_Transcript_9/11_Confidence_0.238_Length_2300, Sample3_Locus_5282_Transcript_2/7_Confidence_0.700_Length_1266, SampleTS3_Locus_11808_Transcript_9/11_Confidence_0.565_Length_1006, SampleTS3_Locus_23038_Transcript_2/3_Confidence_0.333_Length_1864, SampleTS2_Locus_4874_Transcript_6/12_Confidence_0.158_Length_1042, Sample3_Locus_23176_Transcript_2/3_Confidence_0.333_Length_1282, SampleTS1_Locus_5373_Transcript_26/33_Confidence_0.065_Length_1620, Sample6_Locus_12695_Transcript_1/2_Confidence_0.333_Length_2218, SampleTS3_Locus_23264_Transcript_1/3_Confidence_0.500_Length_845, SampleTS2_Locus_1750_Transcript_17/20_Confidence_0.182_Length_1568, SampleTS1_Locus_789_Transcript_9/11_Confidence_0.238_Length_2300, SampleTS3_Locus_1827_Transcript_3/3_Confidence_0.000_Length_1033, SampleTS3_Locus_11808_Transcript_9/11_Confidence_0.565_Length_1006, SampleTS2_Locus_1750_Transcript_17/20_Confidence_0.182_Length_1568, Sample3_Locus_6833_Transcript_1/1_Confidence_0.000_Length_1688 |
|-------------------------------|----------|----|----------------------------------------------------------------------------------------------------------------------------------------------------------------------------------------------------------------------------------------------------------------------------------------------------------------|------------------------------------|--------------------------------------------------------------------------------------------------------------------------------------------------------------------------------------------------------------------------------------------------------------------------------------------------------------------------------------------------------------------------------------------------------------------------------------------------------------------------------------------------------------------------------------------------------------------------------------------------------------------------------------------------------------------------------------------------------------------------------------------------------------------------------------------------------------------------------------------------------------------------------------------------------------------------------------------------------------------------------------------------------------------------------------------------------------------------------------------------------------------------------------------------------------------------------------------------------------------------------------------------------------------------------------------------------------------------------------------------------------------------------------------------------------------------------------------------------------------------------------------------------------------------------------------------------------------------------------------------------------------------------------------------------------------------------------------------------------------------------------------------------------------------------------------------------------------------------------------------------------------------------------------------------------------------------|

|                                        |          |    |                                                                                                                                                                                                                                                                                                                          |                                    |                                                                                                                                                                                                                                                                                                                                                                                                                                                                                                                                                                                                                                                                                                                                                                                                                                                                                                                                                                                                                                                                                                                                                                                                                                                                                                                                                                                                                                                                                                                                                                                                                                                                                                                                                                                                                                                                                                                                                                                                                                                                                                    |
|----------------------------------------|----------|----|--------------------------------------------------------------------------------------------------------------------------------------------------------------------------------------------------------------------------------------------------------------------------------------------------------------------------|------------------------------------|----------------------------------------------------------------------------------------------------------------------------------------------------------------------------------------------------------------------------------------------------------------------------------------------------------------------------------------------------------------------------------------------------------------------------------------------------------------------------------------------------------------------------------------------------------------------------------------------------------------------------------------------------------------------------------------------------------------------------------------------------------------------------------------------------------------------------------------------------------------------------------------------------------------------------------------------------------------------------------------------------------------------------------------------------------------------------------------------------------------------------------------------------------------------------------------------------------------------------------------------------------------------------------------------------------------------------------------------------------------------------------------------------------------------------------------------------------------------------------------------------------------------------------------------------------------------------------------------------------------------------------------------------------------------------------------------------------------------------------------------------------------------------------------------------------------------------------------------------------------------------------------------------------------------------------------------------------------------------------------------------------------------------------------------------------------------------------------------------|
| <b>Arginine and proline metabolism</b> | map00330 | 12 | ec:2.6.1.13 aminotransferase, ec:4.1.1.50 decarboxylase, ec:1.14.13.39 synthase (NADPH), ec:2.7.3.2 kinase, ec:2.7.2.11 5kinase, ec:1.2.1.41 dehydrogenase, ec:1.14.11.2 4dioxygenase, ec:4.1.1.17 decarboxylase, ec:2.6.1.1 transaminase, ec:1.2.1.3 dehydrogenase (NAD+), ec:1.5.1.2 reductase, ec:3.5.1.4 acylamidase | 1, 1, 1, 1, 2, 3, 6, 2, 3, 6, 1, 2 | SampleTS3_Locus_10707_Transcript_4/7_Confidence_0.500_Length_1675<br>,<br>SampleTS1_Locus_23304_Transcript_2/3_Confidence_0.333_Length_2324<br>, Sample1_Locus_25642_Transcript_6/7_Confidence_0.500_Length_1752,<br>SampleTS2_Locus_24331_Transcript_1/2_Confidence_0.500_Length_2444<br>, Sample3_Locus_23456_Transcript_1/1_Confidence_0.000_Length_1406,<br>SampleTS2_Locus_20780_Transcript_2/3_Confidence_0.600_Length_1460<br>, Sample3_Locus_23456_Transcript_1/1_Confidence_0.000_Length_1406,<br>Sample1_Locus_3087_Transcript_2/3_Confidence_0.333_Length_2354,<br>SampleTS2_Locus_20780_Transcript_2/3_Confidence_0.600_Length_1460<br>, SampleTS3_Locus_1508_Transcript_1/3_Confidence_0.333_Length_933,<br>SampleTS3_Locus_1313_Transcript_8/10_Confidence_0.615_Length_1118<br>,<br>SampleTS1_Locus_10911_Transcript_1/1_Confidence_0.000_Length_1788<br>,<br>SampleTS2_Locus_3141_Transcript_2/5_Confidence_0.500_Length_1713,<br>Sample1_Locus_19782_Transcript_4/6_Confidence_0.200_Length_831,<br>Sample3_Locus_2709_Transcript_17/22_Confidence_0.089_Length_783,<br>Sample6_Locus_7028_Transcript_1/3_Confidence_0.750_Length_1269,<br>SampleTS1_Locus_23304_Transcript_2/3_Confidence_0.333_Length_2324<br>, Sample1_Locus_26802_Transcript_1/2_Confidence_0.667_Length_439,<br>Sample6_Locus_13664_Transcript_1/2_Confidence_0.333_Length_862,<br>SampleTS2_Locus_6646_Transcript_2/2_Confidence_0.333_Length_1520,<br>SampleTS3_Locus_23038_Transcript_2/3_Confidence_0.333_Length_1864<br>,<br>SampleTS2_Locus_4874_Transcript_6/12_Confidence_0.158_Length_1042<br>, Sample3_Locus_23176_Transcript_2/3_Confidence_0.333_Length_1282,<br>SampleTS1_Locus_5373_Transcript_26/33_Confidence_0.065_Length_1620,<br>Sample6_Locus_12695_Transcript_1/2_Confidence_0.333_Length_2218,<br>SampleTS3_Locus_23264_Transcript_1/3_Confidence_0.500_Length_845,<br>SampleTS1_Locus_743_Transcript_11/14_Confidence_0.154_Length_1525<br>,<br>Sample6_Locus_14763_Transcript_11/12_Confidence_0.182_Length_1117<br>, Sample6_Locus_19655_Transcript_1/3_Confidence_0.667_Length_978 |
|----------------------------------------|----------|----|--------------------------------------------------------------------------------------------------------------------------------------------------------------------------------------------------------------------------------------------------------------------------------------------------------------------------|------------------------------------|----------------------------------------------------------------------------------------------------------------------------------------------------------------------------------------------------------------------------------------------------------------------------------------------------------------------------------------------------------------------------------------------------------------------------------------------------------------------------------------------------------------------------------------------------------------------------------------------------------------------------------------------------------------------------------------------------------------------------------------------------------------------------------------------------------------------------------------------------------------------------------------------------------------------------------------------------------------------------------------------------------------------------------------------------------------------------------------------------------------------------------------------------------------------------------------------------------------------------------------------------------------------------------------------------------------------------------------------------------------------------------------------------------------------------------------------------------------------------------------------------------------------------------------------------------------------------------------------------------------------------------------------------------------------------------------------------------------------------------------------------------------------------------------------------------------------------------------------------------------------------------------------------------------------------------------------------------------------------------------------------------------------------------------------------------------------------------------------------|

|                                   |                 |           |                                                                                                                                                                                                                                                                                                                                                                        |                                                               |                                                                                                                                                                                                                                                                                                                                                                                                                                                                                                                                                                                                                                                                                                                                                                                                                                                                                                                                                                                                                                                                                                                                                                                                                                                                                                                                                                                                                                                                                                                                                                                                                                                                   |
|-----------------------------------|-----------------|-----------|------------------------------------------------------------------------------------------------------------------------------------------------------------------------------------------------------------------------------------------------------------------------------------------------------------------------------------------------------------------------|---------------------------------------------------------------|-------------------------------------------------------------------------------------------------------------------------------------------------------------------------------------------------------------------------------------------------------------------------------------------------------------------------------------------------------------------------------------------------------------------------------------------------------------------------------------------------------------------------------------------------------------------------------------------------------------------------------------------------------------------------------------------------------------------------------------------------------------------------------------------------------------------------------------------------------------------------------------------------------------------------------------------------------------------------------------------------------------------------------------------------------------------------------------------------------------------------------------------------------------------------------------------------------------------------------------------------------------------------------------------------------------------------------------------------------------------------------------------------------------------------------------------------------------------------------------------------------------------------------------------------------------------------------------------------------------------------------------------------------------------|
| <p><b>Tyrosine metabolism</b></p> | <p>map00350</p> | <p>12</p> | <p>ec:1.4.3.2 oxidase,<br/>ec:2.6.1.57 transaminase,<br/>ec:2.6.1.58 transaminase,<br/>ec:3.7.1.2 betadiketonase,<br/>ec:1.13.11.27 dioxygenase,<br/>ec:1.1.1.1 dehydrogenase,<br/>ec:2.6.1.5 transaminase,<br/>ec:2.6.1.9 transaminase,<br/>ec:2.6.1.1 transaminase,<br/>ec:1.2.1.5 dehydrogenase [NAD(P)+],<br/>ec:1.14.16.2 3monooxygenase, ec:1.4.3.21 oxidase</p> | <p>1, 2,<br/>1, 1,<br/>3, 5,<br/>2, 2,<br/>3, 1,<br/>1, 1</p> | <p>SampleTS1_Locus_1041_Transcript_1/5_Confidence_0.400_Length_2190,<br/>Sample1_Locus_26802_Transcript_1/2_Confidence_0.667_Length_439,<br/>Sample6_Locus_13664_Transcript_1/2_Confidence_0.333_Length_862,<br/>Sample6_Locus_22798_Transcript_3/3_Confidence_0.250_Length_666,<br/>SampleTS1_Locus_6929_Transcript_8/20_Confidence_0.293_Length_1407<br/>,<br/>SampleTS1_Locus_605_Transcript_11/25_Confidence_0.258_Length_787,<br/>SampleTS2_Locus_361_Transcript_3/4_Confidence_0.750_Length_304,<br/>SampleTS1_Locus_605_Transcript_3/25_Confidence_0.161_Length_805,<br/>SampleTS2_Locus_4874_Transcript_6/12_Confidence_0.158_Length_1042<br/>,<br/>Sample6_Locus_1524_Transcript_26/30_Confidence_0.185_Length_3215,<br/>SampleTS2_Locus_263_Transcript_1/3_Confidence_0.250_Length_2184,<br/>SampleTS3_Locus_400_Transcript_6/29_Confidence_0.422_Length_2479,<br/>SampleTS3_Locus_23264_Transcript_1/3_Confidence_0.500_Length_845,<br/>Sample1_Locus_26802_Transcript_1/2_Confidence_0.667_Length_439,<br/>Sample6_Locus_13664_Transcript_1/2_Confidence_0.333_Length_862,<br/>Sample1_Locus_26802_Transcript_1/2_Confidence_0.667_Length_439,<br/>Sample6_Locus_13664_Transcript_1/2_Confidence_0.333_Length_862,<br/>Sample1_Locus_26802_Transcript_1/2_Confidence_0.667_Length_439,<br/>Sample6_Locus_13664_Transcript_1/2_Confidence_0.333_Length_862,<br/>SampleTS2_Locus_6646_Transcript_2/2_Confidence_0.333_Length_1520,<br/>SampleTS1_Locus_5373_Transcript_26/33_Confidence_0.065_Length_1620,<br/>Sample3_Locus_2321_Transcript_7/9_Confidence_0.414_Length_1007,<br/>Sample1_Locus_4359_Transcript_11/14_Confidence_0.314_Length_2540</p> |
|-----------------------------------|-----------------|-----------|------------------------------------------------------------------------------------------------------------------------------------------------------------------------------------------------------------------------------------------------------------------------------------------------------------------------------------------------------------------------|---------------------------------------------------------------|-------------------------------------------------------------------------------------------------------------------------------------------------------------------------------------------------------------------------------------------------------------------------------------------------------------------------------------------------------------------------------------------------------------------------------------------------------------------------------------------------------------------------------------------------------------------------------------------------------------------------------------------------------------------------------------------------------------------------------------------------------------------------------------------------------------------------------------------------------------------------------------------------------------------------------------------------------------------------------------------------------------------------------------------------------------------------------------------------------------------------------------------------------------------------------------------------------------------------------------------------------------------------------------------------------------------------------------------------------------------------------------------------------------------------------------------------------------------------------------------------------------------------------------------------------------------------------------------------------------------------------------------------------------------|

|                            |          |    |                                                                                                                                                                                                                                                                                                                                                              |                                                |                                                                                                                                                                                                                                                                                                                                                                                                                                                                                                                                                                                                                                                                                                                                                                                                                                                                                                                                                                                                                                                              |
|----------------------------|----------|----|--------------------------------------------------------------------------------------------------------------------------------------------------------------------------------------------------------------------------------------------------------------------------------------------------------------------------------------------------------------|------------------------------------------------|--------------------------------------------------------------------------------------------------------------------------------------------------------------------------------------------------------------------------------------------------------------------------------------------------------------------------------------------------------------------------------------------------------------------------------------------------------------------------------------------------------------------------------------------------------------------------------------------------------------------------------------------------------------------------------------------------------------------------------------------------------------------------------------------------------------------------------------------------------------------------------------------------------------------------------------------------------------------------------------------------------------------------------------------------------------|
| <b>Folate biosynthesis</b> | map00790 | 11 | ec:1.1.1.184 reductase (NADPH),<br>ec:4.1.99.22 3',8cyclase,<br>ec:6.3.2.12 synthase,<br>ec:2.6.1.85 synthase,<br>ec:4.6.1.17 pyranopterin monophosphate synthase,<br>ec:2.7.7.75 adenylyltransferase,<br>ec:2.10.1.1 molybdotransferase,<br>ec:1.1.1.21 reductase,<br>ec:1.14.16.4 5monooxygenase, ec:1.14.16.1 4monooxygenase, ec:1.14.16.2 3monooxygenase | 1, 2,<br>1, 1,<br>2, 2,<br>1, 2,<br>1, 1,<br>1 | Sample6_Locus_15547_Transcript_5/8_Confidence_0.545_Length_1332,<br>Sample1_Locus_18859_Transcript_2/4_Confidence_0.600_Length_1538,<br>SampleTS1_Locus_832_Transcript_11/13_Confidence_0.615_Length_1939,<br>Sample6_Locus_15388_Transcript_2/3_Confidence_0.333_Length_1168,<br>SampleTS3_Locus_14492_Transcript_3/7_Confidence_0.111_Length_1768,<br>Sample1_Locus_18859_Transcript_2/4_Confidence_0.600_Length_1538,<br>SampleTS1_Locus_832_Transcript_11/13_Confidence_0.615_Length_1939,<br>SampleTS3_Locus_4837_Transcript_2/4_Confidence_0.750_Length_1516,<br>Sample3_Locus_26982_Transcript_2/2_Confidence_0.000_Length_647,<br>SampleTS3_Locus_4837_Transcript_2/4_Confidence_0.750_Length_1516,<br>Sample6_Locus_15547_Transcript_5/8_Confidence_0.545_Length_1332,<br>SampleTS3_Locus_8149_Transcript_4/10_Confidence_0.118_Length_927,<br>Sample3_Locus_2321_Transcript_7/9_Confidence_0.414_Length_1007,<br>Sample3_Locus_2321_Transcript_7/9_Confidence_0.414_Length_1007,<br>Sample3_Locus_2321_Transcript_7/9_Confidence_0.414_Length_1007 |
|----------------------------|----------|----|--------------------------------------------------------------------------------------------------------------------------------------------------------------------------------------------------------------------------------------------------------------------------------------------------------------------------------------------------------------|------------------------------------------------|--------------------------------------------------------------------------------------------------------------------------------------------------------------------------------------------------------------------------------------------------------------------------------------------------------------------------------------------------------------------------------------------------------------------------------------------------------------------------------------------------------------------------------------------------------------------------------------------------------------------------------------------------------------------------------------------------------------------------------------------------------------------------------------------------------------------------------------------------------------------------------------------------------------------------------------------------------------------------------------------------------------------------------------------------------------|

|                                       |                 |           |                                                                                                                                                                                                                                                                                                                                                            |                                                                 |                                                                                                                                                                                                                                                                                                                                                                                                                                                                                                                                                                                                                                                                                                                                                                                                                                                                                                                                                                                                                                                                                                                                                                                                                                                                                                                                                                                                                                                                                                                                                                                                                                                                                                                                                                                                                                                                                                                                                                                                                                                                                                                                                                                                                                                                                                                                |
|---------------------------------------|-----------------|-----------|------------------------------------------------------------------------------------------------------------------------------------------------------------------------------------------------------------------------------------------------------------------------------------------------------------------------------------------------------------|-----------------------------------------------------------------|--------------------------------------------------------------------------------------------------------------------------------------------------------------------------------------------------------------------------------------------------------------------------------------------------------------------------------------------------------------------------------------------------------------------------------------------------------------------------------------------------------------------------------------------------------------------------------------------------------------------------------------------------------------------------------------------------------------------------------------------------------------------------------------------------------------------------------------------------------------------------------------------------------------------------------------------------------------------------------------------------------------------------------------------------------------------------------------------------------------------------------------------------------------------------------------------------------------------------------------------------------------------------------------------------------------------------------------------------------------------------------------------------------------------------------------------------------------------------------------------------------------------------------------------------------------------------------------------------------------------------------------------------------------------------------------------------------------------------------------------------------------------------------------------------------------------------------------------------------------------------------------------------------------------------------------------------------------------------------------------------------------------------------------------------------------------------------------------------------------------------------------------------------------------------------------------------------------------------------------------------------------------------------------------------------------------------------|
| <p><b>Glycerolipid metabolism</b></p> | <p>map00561</p> | <p>11</p> | <p>ec:2.3.1.15<br/>1Oacyltransferase, ec:2.3.1.20<br/>Oacyltransferase, ec:3.1.1.3<br/>lipase, ec:2.3.1.51<br/>Oacyltransferase, ec:3.1.3.4<br/>phosphatase, ec:1.1.1.2<br/>dehydrogenase (NADP+), ec:1.1.1.202<br/>dehydrogenase, ec:1.2.1.3<br/>dehydrogenase (NAD+), ec:3.2.1.22<br/>melibiase, ec:1.1.1.21<br/>reductase, ec:2.4.1.46<br/>synthase</p> | <p>4, 2,<br/>1, 1,<br/>2,<br/>10,<br/>1, 6,<br/>1, 2,<br/>2</p> | <p>SampleTS1_Locus_7733_Transcript_3/6_Confidence_0.615_Length_1523,<br/>Sample6_Locus_335_Transcript_1/5_Confidence_0.214_Length_2401,<br/>Sample1_Locus_24278_Transcript_1/2_Confidence_0.667_Length_689,<br/>SampleTS2_Locus_5399_Transcript_4/5_Confidence_0.034_Length_1249,<br/>Sample1_Locus_18933_Transcript_2/3_Confidence_0.714_Length_599,<br/>Sample3_Locus_18000_Transcript_1/1_Confidence_0.000_Length_845,<br/>Sample6_Locus_7047_Transcript_8/10_Confidence_0.182_Length_2472,<br/>SampleTS1_Locus_7733_Transcript_3/6_Confidence_0.615_Length_1523,<br/>Sample1_Locus_2193_Transcript_40/42_Confidence_0.262_Length_1445,<br/>SampleTS2_Locus_23786_Transcript_1/1_Confidence_0.000_Length_866,<br/>Sample6_Locus_15547_Transcript_5/8_Confidence_0.545_Length_1332,<br/>Sample6_Locus_7369_Transcript_3/6_Confidence_0.200_Length_1828,<br/>SampleTS1_Locus_2734_Transcript_1/3_Confidence_0.333_Length_2491,<br/>SampleTS2_Locus_15764_Transcript_1/1_Confidence_0.000_Length_1068<br/>, Sample3_Locus_27117_Transcript_1/3_Confidence_0.250_Length_685,<br/>Sample6_Locus_6954_Transcript_4/5_Confidence_0.500_Length_1201,<br/>Sample6_Locus_4129_Transcript_8/27_Confidence_0.107_Length_571,<br/>SampleTS3_Locus_8149_Transcript_4/10_Confidence_0.118_Length_927,<br/>SampleTS1_Locus_6731_Transcript_14/15_Confidence_0.246_Length_230<br/>3,<br/>SampleTS1_Locus_10087_Transcript_6/7_Confidence_0.167_Length_948,<br/>SampleTS2_Locus_263_Transcript_1/3_Confidence_0.250_Length_2184,<br/>SampleTS3_Locus_23038_Transcript_2/3_Confidence_0.333_Length_1864<br/>,<br/>SampleTS2_Locus_4874_Transcript_6/12_Confidence_0.158_Length_1042<br/>, Sample3_Locus_23176_Transcript_2/3_Confidence_0.333_Length_1282,<br/>SampleTS1_Locus_5373_Transcript_26/33_Confidence_0.065_Length_162<br/>0,<br/>Sample6_Locus_12695_Transcript_1/2_Confidence_0.333_Length_2218,<br/>SampleTS3_Locus_23264_Transcript_1/3_Confidence_0.500_Length_845,<br/>SampleTS2_Locus_3316_Transcript_5/7_Confidence_0.211_Length_3110,<br/>Sample6_Locus_15547_Transcript_5/8_Confidence_0.545_Length_1332,<br/>SampleTS3_Locus_8149_Transcript_4/10_Confidence_0.118_Length_927,<br/>Sample3_Locus_4295_Transcript_2/4_Confidence_0.750_Length_1683,<br/>Sample3_Locus_16636_Transcript_4/5_Confidence_0.364_Length_994</p> |
|---------------------------------------|-----------------|-----------|------------------------------------------------------------------------------------------------------------------------------------------------------------------------------------------------------------------------------------------------------------------------------------------------------------------------------------------------------------|-----------------------------------------------------------------|--------------------------------------------------------------------------------------------------------------------------------------------------------------------------------------------------------------------------------------------------------------------------------------------------------------------------------------------------------------------------------------------------------------------------------------------------------------------------------------------------------------------------------------------------------------------------------------------------------------------------------------------------------------------------------------------------------------------------------------------------------------------------------------------------------------------------------------------------------------------------------------------------------------------------------------------------------------------------------------------------------------------------------------------------------------------------------------------------------------------------------------------------------------------------------------------------------------------------------------------------------------------------------------------------------------------------------------------------------------------------------------------------------------------------------------------------------------------------------------------------------------------------------------------------------------------------------------------------------------------------------------------------------------------------------------------------------------------------------------------------------------------------------------------------------------------------------------------------------------------------------------------------------------------------------------------------------------------------------------------------------------------------------------------------------------------------------------------------------------------------------------------------------------------------------------------------------------------------------------------------------------------------------------------------------------------------------|

|                                                 |          |    |                                                                                                                                                                                                                                                                                                                                                                   |                                                    |                                                                                                                                                                                                                                                                                                                                                                                                                                                                                                                                                                                                                                                                                                                                                                                                                                                                                                                                                                                                                                                                                                                                                                                                                                                                                                                                                                                                                                                                                                                                                                                                                                                                                                                                                                                                                                                                                                                                                                                                                                                                                                                                                                                                                                                                        |
|-------------------------------------------------|----------|----|-------------------------------------------------------------------------------------------------------------------------------------------------------------------------------------------------------------------------------------------------------------------------------------------------------------------------------------------------------------------|----------------------------------------------------|------------------------------------------------------------------------------------------------------------------------------------------------------------------------------------------------------------------------------------------------------------------------------------------------------------------------------------------------------------------------------------------------------------------------------------------------------------------------------------------------------------------------------------------------------------------------------------------------------------------------------------------------------------------------------------------------------------------------------------------------------------------------------------------------------------------------------------------------------------------------------------------------------------------------------------------------------------------------------------------------------------------------------------------------------------------------------------------------------------------------------------------------------------------------------------------------------------------------------------------------------------------------------------------------------------------------------------------------------------------------------------------------------------------------------------------------------------------------------------------------------------------------------------------------------------------------------------------------------------------------------------------------------------------------------------------------------------------------------------------------------------------------------------------------------------------------------------------------------------------------------------------------------------------------------------------------------------------------------------------------------------------------------------------------------------------------------------------------------------------------------------------------------------------------------------------------------------------------------------------------------------------------|
| <b>Pentose and glucuronate interconversions</b> | map00040 | 11 | ec:5.1.3.1 3epimerase,<br>ec:2.7.7.9 uridylyltransferase,<br>ec:2.7.7.64 uridylyltransferase,<br>ec:1.1.1.2 dehydrogenase (NADP+),<br>ec:2.7.7.44 uridylyltransferase,<br>ec:1.1.1.57 reductase,<br>ec:1.1.1.14 2dehydrogenase,<br>ec:1.1.1.19 reductase,<br>ec:1.1.1.22 6dehydrogenase,<br>ec:1.1.1.21 reductase,<br>ec:2.4.1.17 1naphthol glucuronyltransferase | 1, 5,<br>5,<br>10,<br>1, 1,<br>1, 1,<br>2, 2,<br>3 | Sample3_Locus_3334_Transcript_1/5_Confidence_0.400_Length_1030,<br>SampleTS3_Locus_2330_Transcript_4/4_Confidence_0.000_Length_1686,<br>SampleTS1_Locus_16292_Transcript_4/5_Confidence_0.600_Length_1341,<br>Sample3_Locus_4208_Transcript_8/15_Confidence_0.091_Length_2117,<br>Sample3_Locus_40_Transcript_1/1_Confidence_0.000_Length_1702,<br>Sample3_Locus_14770_Transcript_1/1_Confidence_0.000_Length_1819,<br>SampleTS3_Locus_2330_Transcript_4/4_Confidence_0.000_Length_1686,<br>SampleTS1_Locus_16292_Transcript_4/5_Confidence_0.600_Length_1341,<br>Sample3_Locus_4208_Transcript_8/15_Confidence_0.091_Length_2117,<br>Sample3_Locus_40_Transcript_1/1_Confidence_0.000_Length_1702,<br>Sample3_Locus_14770_Transcript_1/1_Confidence_0.000_Length_1819,<br>Sample6_Locus_15547_Transcript_5/8_Confidence_0.545_Length_1332,<br>Sample6_Locus_7369_Transcript_3/6_Confidence_0.200_Length_1828,<br>SampleTS1_Locus_2734_Transcript_1/3_Confidence_0.333_Length_2491,<br>SampleTS2_Locus_15764_Transcript_1/1_Confidence_0.000_Length_1068,<br>Sample3_Locus_27117_Transcript_1/3_Confidence_0.250_Length_685,<br>Sample6_Locus_6954_Transcript_4/5_Confidence_0.500_Length_1201,<br>Sample6_Locus_4129_Transcript_8/27_Confidence_0.107_Length_571,<br>SampleTS3_Locus_8149_Transcript_4/10_Confidence_0.118_Length_927,<br>SampleTS1_Locus_6731_Transcript_14/15_Confidence_0.246_Length_2303,<br>SampleTS1_Locus_10087_Transcript_6/7_Confidence_0.167_Length_948,<br>SampleTS3_Locus_2330_Transcript_4/4_Confidence_0.000_Length_1686,<br>SampleTS3_Locus_26045_Transcript_2/2_Confidence_0.000_Length_444,<br>SampleTS2_Locus_54_Transcript_4/10_Confidence_0.083_Length_1374,<br>SampleTS3_Locus_8149_Transcript_4/10_Confidence_0.118_Length_927,<br>SampleTS3_Locus_1975_Transcript_19/64_Confidence_0.064_Length_546,<br>SampleTS2_Locus_4_Transcript_35/36_Confidence_0.021_Length_1580,<br>Sample6_Locus_15547_Transcript_5/8_Confidence_0.545_Length_1332,<br>SampleTS3_Locus_8149_Transcript_4/10_Confidence_0.118_Length_927,<br>Sample6_Locus_9455_Transcript_3/4_Confidence_0.200_Length_1370,<br>SampleTS1_Locus_4303_Transcript_9/11_Confidence_0.167_Length_1464,<br>Sample6_Locus_8395_Transcript_14/17_Confidence_0.508_Length_1568 |
|-------------------------------------------------|----------|----|-------------------------------------------------------------------------------------------------------------------------------------------------------------------------------------------------------------------------------------------------------------------------------------------------------------------------------------------------------------------|----------------------------------------------------|------------------------------------------------------------------------------------------------------------------------------------------------------------------------------------------------------------------------------------------------------------------------------------------------------------------------------------------------------------------------------------------------------------------------------------------------------------------------------------------------------------------------------------------------------------------------------------------------------------------------------------------------------------------------------------------------------------------------------------------------------------------------------------------------------------------------------------------------------------------------------------------------------------------------------------------------------------------------------------------------------------------------------------------------------------------------------------------------------------------------------------------------------------------------------------------------------------------------------------------------------------------------------------------------------------------------------------------------------------------------------------------------------------------------------------------------------------------------------------------------------------------------------------------------------------------------------------------------------------------------------------------------------------------------------------------------------------------------------------------------------------------------------------------------------------------------------------------------------------------------------------------------------------------------------------------------------------------------------------------------------------------------------------------------------------------------------------------------------------------------------------------------------------------------------------------------------------------------------------------------------------------------|

|                               |          |    |                                                                                                                                                                                                                                                                                                                                                                         |                                          |                                                                                                                                                                                                                                                                                                                                                                                                                                                                                                                                                                                                                                                                                                                                                                                                                                                                                                                                                                                                                                                                                                                                                                                                                                           |
|-------------------------------|----------|----|-------------------------------------------------------------------------------------------------------------------------------------------------------------------------------------------------------------------------------------------------------------------------------------------------------------------------------------------------------------------------|------------------------------------------|-------------------------------------------------------------------------------------------------------------------------------------------------------------------------------------------------------------------------------------------------------------------------------------------------------------------------------------------------------------------------------------------------------------------------------------------------------------------------------------------------------------------------------------------------------------------------------------------------------------------------------------------------------------------------------------------------------------------------------------------------------------------------------------------------------------------------------------------------------------------------------------------------------------------------------------------------------------------------------------------------------------------------------------------------------------------------------------------------------------------------------------------------------------------------------------------------------------------------------------------|
| <b>betaAlanine metabolism</b> | map00410 | 10 | ec:2.6.1.18<br>transaminase,<br>ec:2.6.1.19<br>transaminase,<br>ec:3.5.2.2<br>hydantoinase,<br>ec:1.2.1.18<br>dehydrogenase<br>(acetylating),<br>ec:4.1.1.15<br>decarboxylase,<br>ec:4.2.1.17<br>hydratase,<br>ec:1.2.1.5<br>dehydrogenase<br>[NAD(P)+],<br>ec:1.2.1.3<br>dehydrogenase<br>(NAD+),<br>ec:1.3.1.2<br>dehydrogenase<br>(NADP+),<br>ec:1.4.3.21<br>oxidase | 1, 1,<br>2, 1,<br>1, 2,<br>1, 6,<br>1, 1 | Sample3_Locus_1833_Transcript_4/6_Confidence_0.500_Length_1265,<br>SampleTS1_Locus_13173_Transcript_7/8_Confidence_0.190_Length_747,<br>SampleTS1_Locus_275_Transcript_59/85_Confidence_0.013_Length_590,<br>Sample6_Locus_10051_Transcript_2/3_Confidence_0.333_Length_1368,<br>SampleTS3_Locus_23038_Transcript_2/3_Confidence_0.333_Length_1864<br>,<br>SampleTS3_Locus_5084_Transcript_15/17_Confidence_0.206_Length_175<br>1,<br>SampleTS1_Locus_789_Transcript_9/11_Confidence_0.238_Length_2300,<br>Sample3_Locus_5282_Transcript_2/7_Confidence_0.700_Length_1266,<br>SampleTS1_Locus_5373_Transcript_26/33_Confidence_0.065_Length_162<br>0,<br>SampleTS3_Locus_23038_Transcript_2/3_Confidence_0.333_Length_1864<br>,<br>SampleTS2_Locus_4874_Transcript_6/12_Confidence_0.158_Length_1042<br>, Sample3_Locus_23176_Transcript_2/3_Confidence_0.333_Length_1282,<br>SampleTS1_Locus_5373_Transcript_26/33_Confidence_0.065_Length_162<br>0,<br>Sample6_Locus_12695_Transcript_1/2_Confidence_0.333_Length_2218,<br>SampleTS3_Locus_23264_Transcript_1/3_Confidence_0.500_Length_845,<br>SampleTS2_Locus_1483_Transcript_3/13_Confidence_0.364_Length_1620<br>, Sample1_Locus_4359_Transcript_11/14_Confidence_0.314_Length_2540 |
|-------------------------------|----------|----|-------------------------------------------------------------------------------------------------------------------------------------------------------------------------------------------------------------------------------------------------------------------------------------------------------------------------------------------------------------------------|------------------------------------------|-------------------------------------------------------------------------------------------------------------------------------------------------------------------------------------------------------------------------------------------------------------------------------------------------------------------------------------------------------------------------------------------------------------------------------------------------------------------------------------------------------------------------------------------------------------------------------------------------------------------------------------------------------------------------------------------------------------------------------------------------------------------------------------------------------------------------------------------------------------------------------------------------------------------------------------------------------------------------------------------------------------------------------------------------------------------------------------------------------------------------------------------------------------------------------------------------------------------------------------------|



|                                          |          |    |                                                                                                                                                                                                                                                                                                          |                                          |                                                                                                                                                                                                                                                                                                                                                                                                                                                                                                                                                                                                                                                                                                                                                                                                                                                                                                                                                                                                                                                                                                                             |
|------------------------------------------|----------|----|----------------------------------------------------------------------------------------------------------------------------------------------------------------------------------------------------------------------------------------------------------------------------------------------------------|------------------------------------------|-----------------------------------------------------------------------------------------------------------------------------------------------------------------------------------------------------------------------------------------------------------------------------------------------------------------------------------------------------------------------------------------------------------------------------------------------------------------------------------------------------------------------------------------------------------------------------------------------------------------------------------------------------------------------------------------------------------------------------------------------------------------------------------------------------------------------------------------------------------------------------------------------------------------------------------------------------------------------------------------------------------------------------------------------------------------------------------------------------------------------------|
| <b>Pantothenate and CoA biosynthesis</b> | map00770 | 10 | ec:3.5.2.2 hydantoinase,<br>ec:3.6.1.9 diphosphatase,<br>ec:4.2.1.9 dehydratase,<br>ec:2.2.1.6 synthase,<br>ec:6.3.2.5 ligase (CTP),<br>ec:2.7.1.33 kinase,<br>ec:2.6.1.42 transaminase,<br>ec:2.7.7.3 adenylyltransferase,<br>ec:1.1.1.86 reductoisomerase (NADP+),<br>ec:1.3.1.2 dehydrogenase (NADP+) | 2, 5,<br>1, 1,<br>1, 1,<br>2, 1,<br>1, 1 | SampleTS1_Locus_275_Transcript_59/85_Confidence_0.013_Length_590,<br>Sample6_Locus_10051_Transcript_2/3_Confidence_0.333_Length_1368,<br>Sample6_Locus_1849_Transcript_4/6_Confidence_0.429_Length_866,<br>Sample3_Locus_345_Transcript_6/8_Confidence_0.455_Length_1801,<br>SampleTS3_Locus_5573_Transcript_4/5_Confidence_0.333_Length_940,<br>Sample3_Locus_10699_Transcript_3/4_Confidence_0.400_Length_957,<br>Sample3_Locus_27182_Transcript_2/3_Confidence_0.250_Length_1010,<br>Sample1_Locus_2272_Transcript_43/67_Confidence_0.374_Length_2859,<br>Sample3_Locus_4596_Transcript_3/6_Confidence_0.400_Length_1157,<br>SampleTS2_Locus_6327_Transcript_8/25_Confidence_0.174_Length_1156,<br>SampleTS1_Locus_877_Transcript_3/8_Confidence_0.375_Length_2543,<br>Sample1_Locus_18777_Transcript_2/4_Confidence_0.923_Length_1416,<br>Sample3_Locus_5952_Transcript_4/4_Confidence_0.000_Length_2586,<br>SampleTS1_Locus_19274_Transcript_4/5_Confidence_0.038_Length_1457,<br>Sample1_Locus_2001_Transcript_4/7_Confidence_0.600_Length_1686,<br>SampleTS2_Locus_1483_Transcript_3/13_Confidence_0.364_Length_1620 |
|------------------------------------------|----------|----|----------------------------------------------------------------------------------------------------------------------------------------------------------------------------------------------------------------------------------------------------------------------------------------------------------|------------------------------------------|-----------------------------------------------------------------------------------------------------------------------------------------------------------------------------------------------------------------------------------------------------------------------------------------------------------------------------------------------------------------------------------------------------------------------------------------------------------------------------------------------------------------------------------------------------------------------------------------------------------------------------------------------------------------------------------------------------------------------------------------------------------------------------------------------------------------------------------------------------------------------------------------------------------------------------------------------------------------------------------------------------------------------------------------------------------------------------------------------------------------------------|

|                              |          |    |                                                                                                                                                                                                                                                                                                                                                              |                                          |                                                                                                                                                                                                                                                                                                                                                                                                                                                                                                                                                                                                                                                                                                                                                                                                                                                                                                                                                                                                                                                                                                                                                                                                                                                                                 |
|------------------------------|----------|----|--------------------------------------------------------------------------------------------------------------------------------------------------------------------------------------------------------------------------------------------------------------------------------------------------------------------------------------------------------------|------------------------------------------|---------------------------------------------------------------------------------------------------------------------------------------------------------------------------------------------------------------------------------------------------------------------------------------------------------------------------------------------------------------------------------------------------------------------------------------------------------------------------------------------------------------------------------------------------------------------------------------------------------------------------------------------------------------------------------------------------------------------------------------------------------------------------------------------------------------------------------------------------------------------------------------------------------------------------------------------------------------------------------------------------------------------------------------------------------------------------------------------------------------------------------------------------------------------------------------------------------------------------------------------------------------------------------|
| <b>Arginine biosynthesis</b> | map00220 | 10 | ec:2.6.1.11<br>transaminase,<br>ec:1.14.13.39<br>synthase<br>(NADPH),<br>ec:6.3.1.2<br>synthetase,<br>ec:2.3.1.35<br>Nacetyltransfer<br>ase, ec:6.3.4.16<br>synthase<br>(ammonia),<br>ec:2.6.1.2<br>transaminase,<br>ec:2.6.1.1<br>transaminase,<br>ec:2.3.1.1<br>Nacetyltransfer<br>ase, ec:3.5.1.2<br>glutaminase I,<br>ec:3.5.1.5<br>ec:3.5.1.5<br>urease | 1, 1,<br>2, 2,<br>1, 3,<br>3, 2,<br>2, 1 | SampleTS1_Locus_13173_Transcript_7/8_Confidence_0.190_Length_747,<br>Sample1_Locus_25642_Transcript_6/7_Confidence_0.500_Length_1752,<br>Sample1_Locus_3256_Transcript_2/10_Confidence_0.182_Length_1415,<br>SampleTS2_Locus_4400_Transcript_6/7_Confidence_0.333_Length_1376,<br>Sample3_Locus_17004_Transcript_3/5_Confidence_0.286_Length_574,<br>Sample3_Locus_3732_Transcript_3/7_Confidence_0.545_Length_970,<br>SampleTS3_Locus_15776_Transcript_1/2_Confidence_0.333_Length_1102<br>,<br>Sample6_Locus_2195_Transcript_14/16_Confidence_0.176_Length_1741,<br>SampleTS3_Locus_714_Transcript_7/14_Confidence_0.087_Length_1194,<br>Sample1_Locus_19449_Transcript_1/1_Confidence_0.000_Length_1704,<br>Sample1_Locus_26802_Transcript_1/2_Confidence_0.667_Length_439,<br>Sample6_Locus_13664_Transcript_1/2_Confidence_0.333_Length_862,<br>SampleTS2_Locus_6646_Transcript_2/2_Confidence_0.333_Length_1520,<br>Sample3_Locus_17004_Transcript_3/5_Confidence_0.286_Length_574,<br>Sample3_Locus_3732_Transcript_3/7_Confidence_0.545_Length_970,<br>Sample6_Locus_3307_Transcript_18/23_Confidence_0.163_Length_735,<br>SampleTS1_Locus_5169_Transcript_10/19_Confidence_0.593_Length_316<br>2,<br>SampleTS3_Locus_10659_Transcript_7/8_Confidence_0.389_Length_1749 |
|------------------------------|----------|----|--------------------------------------------------------------------------------------------------------------------------------------------------------------------------------------------------------------------------------------------------------------------------------------------------------------------------------------------------------------|------------------------------------------|---------------------------------------------------------------------------------------------------------------------------------------------------------------------------------------------------------------------------------------------------------------------------------------------------------------------------------------------------------------------------------------------------------------------------------------------------------------------------------------------------------------------------------------------------------------------------------------------------------------------------------------------------------------------------------------------------------------------------------------------------------------------------------------------------------------------------------------------------------------------------------------------------------------------------------------------------------------------------------------------------------------------------------------------------------------------------------------------------------------------------------------------------------------------------------------------------------------------------------------------------------------------------------|

|                                   |                 |           |                                                                                                                                                                                                                                                                                                                                |                                                     |                                                                                                                                                                                                                                                                                                                                                                                                                                                                                                                                                                                                                                                                                                                                                                                                                                                                                                                                                                                                                                                                                                                                                                                             |
|-----------------------------------|-----------------|-----------|--------------------------------------------------------------------------------------------------------------------------------------------------------------------------------------------------------------------------------------------------------------------------------------------------------------------------------|-----------------------------------------------------|---------------------------------------------------------------------------------------------------------------------------------------------------------------------------------------------------------------------------------------------------------------------------------------------------------------------------------------------------------------------------------------------------------------------------------------------------------------------------------------------------------------------------------------------------------------------------------------------------------------------------------------------------------------------------------------------------------------------------------------------------------------------------------------------------------------------------------------------------------------------------------------------------------------------------------------------------------------------------------------------------------------------------------------------------------------------------------------------------------------------------------------------------------------------------------------------|
| <p><b>Nitrogen metabolism</b></p> | <p>map00910</p> | <p>10</p> | <p>ec:4.2.1.1 anhydrase,<br/>ec:6.3.1.2 synthetase,<br/>ec:3.5.5.1 acetonitrilase,<br/>ec:1.4.7.1 synthase (ferredoxin),<br/>ec:6.3.4.16 synthase (ammonia),<br/>ec:1.7.99.1 reductase,<br/>ec:1.7.1.1 reductase (NADH),<br/>ec:1.7.1.3 reductase (NADPH),<br/>ec:4.2.1.104 cyanate lyase,<br/>ec:1.4.1.14 synthase (NADH)</p> | <p>1, 2,<br/>1, 1,<br/>1, 2,<br/>4, 1,<br/>1, 2</p> | <p>Sample6_Locus_4308_Transcript_3/6_Confidence_0.429_Length_1128,<br/>Sample1_Locus_3256_Transcript_2/10_Confidence_0.182_Length_1415,<br/>SampleTS2_Locus_4400_Transcript_6/7_Confidence_0.333_Length_1376,<br/>Sample3_Locus_27182_Transcript_2/3_Confidence_0.250_Length_1010,<br/>SampleTS3_Locus_21707_Transcript_1/2_Confidence_0.333_Length_2460<br/>,<br/>SampleTS3_Locus_15776_Transcript_1/2_Confidence_0.333_Length_1102<br/>,<br/>SampleTS2_Locus_20766_Transcript_5/7_Confidence_0.250_Length_1030<br/>, Sample3_Locus_2283_Transcript_4/7_Confidence_0.091_Length_449,<br/>SampleTS1_Locus_26901_Transcript_2/4_Confidence_0.095_Length_536,<br/>SampleTS1_Locus_16209_Transcript_2/6_Confidence_0.308_Length_976,<br/>SampleTS1_Locus_11635_Transcript_3/3_Confidence_0.000_Length_825,<br/>SampleTS3_Locus_14467_Transcript_1/1_Confidence_0.000_Length_1733<br/>,<br/>SampleTS2_Locus_13872_Transcript_6/7_Confidence_0.500_Length_988,<br/>SampleTS2_Locus_4384_Transcript_2/13_Confidence_0.653_Length_812,<br/>SampleTS3_Locus_21707_Transcript_1/2_Confidence_0.333_Length_2460<br/>,<br/>SampleTS1_Locus_1310_Transcript_14/17_Confidence_0.222_Length_190<br/>1</p> |
|-----------------------------------|-----------------|-----------|--------------------------------------------------------------------------------------------------------------------------------------------------------------------------------------------------------------------------------------------------------------------------------------------------------------------------------|-----------------------------------------------------|---------------------------------------------------------------------------------------------------------------------------------------------------------------------------------------------------------------------------------------------------------------------------------------------------------------------------------------------------------------------------------------------------------------------------------------------------------------------------------------------------------------------------------------------------------------------------------------------------------------------------------------------------------------------------------------------------------------------------------------------------------------------------------------------------------------------------------------------------------------------------------------------------------------------------------------------------------------------------------------------------------------------------------------------------------------------------------------------------------------------------------------------------------------------------------------------|

|                                        |          |    |                                                                                                                                                                                                                                                                                                                                                                                                                                          |                              |                                                                                                                                                                                                                                                                                                                                                                                                                                                                                                                                                                                                                                                                                                                                                                                                                                                                                                                                                                                                                                      |
|----------------------------------------|----------|----|------------------------------------------------------------------------------------------------------------------------------------------------------------------------------------------------------------------------------------------------------------------------------------------------------------------------------------------------------------------------------------------------------------------------------------------|------------------------------|--------------------------------------------------------------------------------------------------------------------------------------------------------------------------------------------------------------------------------------------------------------------------------------------------------------------------------------------------------------------------------------------------------------------------------------------------------------------------------------------------------------------------------------------------------------------------------------------------------------------------------------------------------------------------------------------------------------------------------------------------------------------------------------------------------------------------------------------------------------------------------------------------------------------------------------------------------------------------------------------------------------------------------------|
| <b>Terpenoid backbone biosynthesis</b> | map00900 | 10 | ec:1.17.7.1 synthase (ferredoxin), ec:1.1.1.216 dehydrogenase (NADP+), ec:2.5.1.29 diphosphate synthase, ec:2.7.1.148 5'diphospho)2C methylDerythritol kinase, ec:2.5.1.85 diphosphate synthase [geranylgeranyl diphosphate specific], ec:2.5.1.84 diphosphate synthase [geranyldiphosphate specific], ec:2.5.1.1 geranyldiphosphate synthase, ec:5.3.3.2 Deltaisomerase, ec:2.5.1.58 farnesyltransferase, ec:2.3.1.9 Cacetyltransferase | 2, 1, 1, 1, 2, 2, 2, 1, 2, 1 | Sample6_Locus_5736_Transcript_2/4_Confidence_0.400_Length_1660, SampleTS1_Locus_12312_Transcript_2/4_Confidence_0.333_Length_2330 , SampleTS1_Locus_13725_Transcript_2/7_Confidence_0.333_Length_1080 , Sample6_Locus_901_Transcript_6/8_Confidence_0.643_Length_1628, Sample6_Locus_16912_Transcript_4/6_Confidence_0.286_Length_1521, SampleTS2_Locus_13350_Transcript_1/3_Confidence_0.778_Length_1614 , SampleTS3_Locus_7085_Transcript_3/3_Confidence_0.000_Length_1349, SampleTS2_Locus_13350_Transcript_1/3_Confidence_0.778_Length_1614 , SampleTS3_Locus_7085_Transcript_3/3_Confidence_0.000_Length_1349, SampleTS2_Locus_13350_Transcript_1/3_Confidence_0.778_Length_1614 , SampleTS3_Locus_7085_Transcript_3/3_Confidence_0.000_Length_1349, Sample6_Locus_5354_Transcript_1/7_Confidence_0.333_Length_1260, SampleTS1_Locus_610_Transcript_52/54_Confidence_0.210_Length_1630 , SampleTS2_Locus_2631_Transcript_10/37_Confidence_0.203_Length_869 , SampleTS2_Locus_1750_Transcript_17/20_Confidence_0.182_Length_1568 |
| <b>Pentose phosphate pathway</b>       | map00030 | 10 | ec:4.1.2.13 aldolase, ec:2.2.1.1 glycolaldehydetransferase, ec:5.1.3.1 3epimerase, ec:3.1.3.11 hexose diphosphatase, ec:2.7.6.1 diphosphokinase, ec:5.3.1.6 isomerase, ec:5.3.1.9 isomerase, ec:1.1.1.44 dehydrogenase (NADP+dependent, decarboxylating), ec:1.1.1.43 2dehydrogenase, ec:1.1.1.49 dehydrogenase (NADP+)                                                                                                                  | 2, 1, 1, 2, 1, 2, 1, 2, 1, 2 | Sample3_Locus_324_Transcript_3/17_Confidence_0.222_Length_1711, Sample6_Locus_28252_Transcript_2/3_Confidence_0.500_Length_808, SampleTS1_Locus_16129_Transcript_1/1_Confidence_0.000_Length_1960 , Sample3_Locus_3334_Transcript_1/5_Confidence_0.400_Length_1030, Sample3_Locus_10262_Transcript_4/5_Confidence_0.062_Length_1337, Sample6_Locus_2283_Transcript_7/17_Confidence_0.225_Length_1818, Sample6_Locus_81_Transcript_6/10_Confidence_0.421_Length_1354, SampleTS1_Locus_27877_Transcript_2/3_Confidence_0.333_Length_987, Sample3_Locus_9475_Transcript_2/2_Confidence_0.000_Length_1080, SampleTS1_Locus_12696_Transcript_3/3_Confidence_0.000_Length_1743 , Sample6_Locus_10552_Transcript_5/5_Confidence_0.000_Length_1013, SampleTS1_Locus_3938_Transcript_9/14_Confidence_0.467_Length_2040 , SampleTS1_Locus_3938_Transcript_9/14_Confidence_0.467_Length_2040 , SampleTS1_Locus_4380_Transcript_8/12_Confidence_0.400_Length_2044 , SampleTS3_Locus_2991_Transcript_5/8_Confidence_0.400_Length_1799             |

|                   |          |    |                                                                                                                                                                                                                                                                                                                                                                |                                          |                                                                                                                                                                                                                                                                                                                                                                                                                                                                                                                                                                                                                                                                                                                                                                                                                                                                                                                                                                                                                                                                                                                                |
|-------------------|----------|----|----------------------------------------------------------------------------------------------------------------------------------------------------------------------------------------------------------------------------------------------------------------------------------------------------------------------------------------------------------------|------------------------------------------|--------------------------------------------------------------------------------------------------------------------------------------------------------------------------------------------------------------------------------------------------------------------------------------------------------------------------------------------------------------------------------------------------------------------------------------------------------------------------------------------------------------------------------------------------------------------------------------------------------------------------------------------------------------------------------------------------------------------------------------------------------------------------------------------------------------------------------------------------------------------------------------------------------------------------------------------------------------------------------------------------------------------------------------------------------------------------------------------------------------------------------|
| Sulfur metabolism | map00920 | 10 | ec:1.8.7.1 sulfite reductase (ferredoxin),<br>ec:3.6.2.1 adenosine 5phosphosulfate sulfohydrolase,<br>ec:2.7.1.25 kinase,<br>ec:2.7.7.4 adenylyltransferase, ec:2.7.7.5 adenylyltransferase (ADP),<br>ec:2.3.1.30 Oacetyltransferase,<br>ec:1.13.11.18 dioxygenase,<br>ec:1.8.1.2 sulfite reductase (NADPH),<br>ec:2.5.1.47 synthase,<br>ec:1.8.99.2 reductase | 2, 1,<br>2, 3,<br>1, 1,<br>1, 1,<br>3, 1 | Sample3_Locus_6284_Transcript_3/6_Confidence_0.300_Length_2211,<br>Sample6_Locus_4302_Transcript_2/16_Confidence_0.036_Length_613,<br>SampleTS2_Locus_12297_Transcript_1/1_Confidence_0.000_Length_1037,<br>Sample3_Locus_6616_Transcript_4/6_Confidence_0.286_Length_793,<br>Sample1_Locus_521_Transcript_109/121_Confidence_0.005_Length_964,<br>SampleTS3_Locus_4546_Transcript_3/8_Confidence_0.429_Length_1895,<br>SampleTS3_Locus_3403_Transcript_3/4_Confidence_0.333_Length_1292,<br>SampleTS1_Locus_25259_Transcript_1/2_Confidence_0.333_Length_1099,<br>SampleTS2_Locus_12297_Transcript_1/1_Confidence_0.000_Length_1037,<br>Sample3_Locus_6377_Transcript_4/4_Confidence_0.125_Length_1830,<br>Sample1_Locus_24616_Transcript_1/1_Confidence_0.000_Length_806,<br>Sample6_Locus_4302_Transcript_2/16_Confidence_0.036_Length_613,<br>Sample1_Locus_15681_Transcript_1/1_Confidence_0.000_Length_1030,<br>Sample6_Locus_5355_Transcript_5/8_Confidence_0.577_Length_1830,<br>SampleTS2_Locus_2923_Transcript_3/4_Confidence_0.333_Length_1277,<br>Sample1_Locus_3645_Transcript_14/15_Confidence_0.067_Length_1362 |
|-------------------|----------|----|----------------------------------------------------------------------------------------------------------------------------------------------------------------------------------------------------------------------------------------------------------------------------------------------------------------------------------------------------------------|------------------------------------------|--------------------------------------------------------------------------------------------------------------------------------------------------------------------------------------------------------------------------------------------------------------------------------------------------------------------------------------------------------------------------------------------------------------------------------------------------------------------------------------------------------------------------------------------------------------------------------------------------------------------------------------------------------------------------------------------------------------------------------------------------------------------------------------------------------------------------------------------------------------------------------------------------------------------------------------------------------------------------------------------------------------------------------------------------------------------------------------------------------------------------------|

|                                      |          |   |                                                                                                                                                                                                                                                                                   |                            |                                                                                                                                                                                                                                                                                                                                                                                                                                                                                                                                                                                                                                                                                                                                                                                                                                                                                                                                                                                                                                                                                                                                                                                                                                                                                                                                                                                                                                                                                                                                                                                                                                                                                                                                                                                                                                                                                                                                                                                                                                                                                                                                                                                                                                                                                                                                                                                                   |
|--------------------------------------|----------|---|-----------------------------------------------------------------------------------------------------------------------------------------------------------------------------------------------------------------------------------------------------------------------------------|----------------------------|---------------------------------------------------------------------------------------------------------------------------------------------------------------------------------------------------------------------------------------------------------------------------------------------------------------------------------------------------------------------------------------------------------------------------------------------------------------------------------------------------------------------------------------------------------------------------------------------------------------------------------------------------------------------------------------------------------------------------------------------------------------------------------------------------------------------------------------------------------------------------------------------------------------------------------------------------------------------------------------------------------------------------------------------------------------------------------------------------------------------------------------------------------------------------------------------------------------------------------------------------------------------------------------------------------------------------------------------------------------------------------------------------------------------------------------------------------------------------------------------------------------------------------------------------------------------------------------------------------------------------------------------------------------------------------------------------------------------------------------------------------------------------------------------------------------------------------------------------------------------------------------------------------------------------------------------------------------------------------------------------------------------------------------------------------------------------------------------------------------------------------------------------------------------------------------------------------------------------------------------------------------------------------------------------------------------------------------------------------------------------------------------------|
| <b>Drug metabolism other enzymes</b> | map00983 | 9 | ec:3.5.2.2 hydantoinase, ec:2.7.1.48 kinase, ec:2.7.1.21 kinase, ec:3.1.1.1 aliesterase, ec:1.1.1.205 dehydrogenase, ec:1.3.1.2 dehydrogenase (NADP+), ec:2.4.2.10 phosphoribosyl transferase, ec:2.4.1.17 1naphthol glucuronyltransferase, ec:2.4.2.8 phosphoribosyl transferase | 2, 3, 1, 22, 1, 1, 1, 3, 1 | SampleTS1_Locus_275_Transcript_59/85_Confidence_0.013_Length_590, Sample6_Locus_10051_Transcript_2/3_Confidence_0.333_Length_1368, Sample1_Locus_7813_Transcript_4/8_Confidence_0.643_Length_1238, SampleTS2_Locus_12437_Transcript_2/3_Confidence_0.667_Length_1244 , SampleTS1_Locus_1762_Transcript_13/36_Confidence_0.058_Length_819 , SampleTS3_Locus_6992_Transcript_3/6_Confidence_0.500_Length_986, SampleTS3_Locus_4982_Transcript_5/18_Confidence_0.148_Length_763, SampleTS2_Locus_16974_Transcript_1/1_Confidence_0.000_Length_814, Sample6_Locus_7047_Transcript_8/10_Confidence_0.182_Length_2472, Sample3_Locus_4061_Transcript_6/10_Confidence_0.500_Length_1879, Sample1_Locus_25249_Transcript_3/5_Confidence_0.400_Length_1933, SampleTS1_Locus_587_Transcript_4/24_Confidence_0.067_Length_950, Sample6_Locus_21506_Transcript_3/6_Confidence_0.286_Length_1572, Sample6_Locus_6377_Transcript_17/31_Confidence_0.105_Length_889, SampleTS2_Locus_23527_Transcript_1/1_Confidence_0.000_Length_1031 , SampleTS2_Locus_1401_Transcript_25/29_Confidence_0.228_Length_1385, SampleTS2_Locus_6522_Transcript_9/11_Confidence_0.500_Length_1378 , SampleTS2_Locus_5980_Transcript_2/3_Confidence_0.333_Length_1195, SampleTS3_Locus_8220_Transcript_1/4_Confidence_0.667_Length_1081, SampleTS1_Locus_5610_Transcript_2/3_Confidence_0.333_Length_1211, Sample6_Locus_26172_Transcript_1/1_Confidence_0.000_Length_814, Sample3_Locus_18908_Transcript_2/3_Confidence_0.333_Length_666, SampleTS1_Locus_11100_Transcript_2/5_Confidence_0.286_Length_1260 , Sample6_Locus_7693_Transcript_9/11_Confidence_0.000_Length_836, SampleTS1_Locus_11345_Transcript_4/5_Confidence_0.692_Length_960, Sample6_Locus_1702_Transcript_13/18_Confidence_0.348_Length_1386, SampleTS2_Locus_2263_Transcript_6/8_Confidence_0.429_Length_1743, SampleTS1_Locus_12215_Transcript_1/1_Confidence_0.000_Length_1974 , Sample3_Locus_18801_Transcript_1/3_Confidence_0.600_Length_1111, SampleTS2_Locus_1483_Transcript_3/13_Confidence_0.364_Length_1620 , SampleTS1_Locus_6359_Transcript_7/7_Confidence_0.294_Length_1274, Sample6_Locus_9455_Transcript_3/4_Confidence_0.200_Length_1370, SampleTS1_Locus_4303_Transcript_9/11_Confidence_0.167_Length_1464 , Sample6_Locus_8395_Transcript_14/17_Confidence_0.508_Length_1568, Sample3_Locus_3267_Transcript_2/5_Confidence_0.400_Length_1108 |
|--------------------------------------|----------|---|-----------------------------------------------------------------------------------------------------------------------------------------------------------------------------------------------------------------------------------------------------------------------------------|----------------------------|---------------------------------------------------------------------------------------------------------------------------------------------------------------------------------------------------------------------------------------------------------------------------------------------------------------------------------------------------------------------------------------------------------------------------------------------------------------------------------------------------------------------------------------------------------------------------------------------------------------------------------------------------------------------------------------------------------------------------------------------------------------------------------------------------------------------------------------------------------------------------------------------------------------------------------------------------------------------------------------------------------------------------------------------------------------------------------------------------------------------------------------------------------------------------------------------------------------------------------------------------------------------------------------------------------------------------------------------------------------------------------------------------------------------------------------------------------------------------------------------------------------------------------------------------------------------------------------------------------------------------------------------------------------------------------------------------------------------------------------------------------------------------------------------------------------------------------------------------------------------------------------------------------------------------------------------------------------------------------------------------------------------------------------------------------------------------------------------------------------------------------------------------------------------------------------------------------------------------------------------------------------------------------------------------------------------------------------------------------------------------------------------------|

|                                |          |   |                                                                                                                                                                                                                                                                                 |                                       |                                                                                                                                                                                                                                                                                                                                                                                                                                                                                                                                                                                                                                                                                                                                                                                                                                                                                                                                                                                                                                                                                                                                                                                                                                                                                                                                                                          |
|--------------------------------|----------|---|---------------------------------------------------------------------------------------------------------------------------------------------------------------------------------------------------------------------------------------------------------------------------------|---------------------------------------|--------------------------------------------------------------------------------------------------------------------------------------------------------------------------------------------------------------------------------------------------------------------------------------------------------------------------------------------------------------------------------------------------------------------------------------------------------------------------------------------------------------------------------------------------------------------------------------------------------------------------------------------------------------------------------------------------------------------------------------------------------------------------------------------------------------------------------------------------------------------------------------------------------------------------------------------------------------------------------------------------------------------------------------------------------------------------------------------------------------------------------------------------------------------------------------------------------------------------------------------------------------------------------------------------------------------------------------------------------------------------|
| <b>Fatty acid biosynthesis</b> | map00061 | 9 | ec:6.4.1.2<br>carboxylase,<br>ec:2.3.1.85<br>synthase,<br>ec:1.1.1.100<br>reductase,<br>ec:3.1.2.21<br>hydrolase,<br>ec:6.2.1.3<br>ligase,<br>ec:2.3.1.39<br>Smalonyltransfe<br>rase,<br>ec:2.3.1.179<br>synthase II,<br>ec:3.1.2.14<br>hydrolase,<br>ec:2.3.1.41<br>synthase I | 2, 5,<br>1, 1,<br>4, 1,<br>1, 2,<br>2 | Sample3_Locus_8920_Transcript_2/3_Confidence_0.333_Length_2038,<br>SampleTS1_Locus_1155_Transcript_11/16_Confidence_0.625_Length_224<br>0,<br>Sample3_Locus_24964_Transcript_1/1_Confidence_0.000_Length_1088,<br>Sample6_Locus_6899_Transcript_8/13_Confidence_0.389_Length_1994,<br>Sample6_Locus_8953_Transcript_13/14_Confidence_0.143_Length_4871,<br>SampleTS3_Locus_3571_Transcript_8/10_Confidence_0.125_Length_1106<br>,<br>Sample6_Locus_10875_Transcript_2/10_Confidence_0.167_Length_1095,<br>Sample6_Locus_8953_Transcript_13/14_Confidence_0.143_Length_4871,<br>Sample6_Locus_10875_Transcript_2/10_Confidence_0.167_Length_1095,<br>SampleTS1_Locus_369_Transcript_24/52_Confidence_0.312_Length_2199<br>,<br>SampleTS1_Locus_24343_Transcript_2/3_Confidence_0.333_Length_1375<br>,<br>Sample1_Locus_5442_Transcript_10/12_Confidence_0.091_Length_2073,<br>Sample3_Locus_31478_Transcript_1/1_Confidence_0.333_Length_620,<br>SampleTS3_Locus_3571_Transcript_8/10_Confidence_0.125_Length_1106<br>, Sample3_Locus_24964_Transcript_1/1_Confidence_0.000_Length_1088,<br>Sample6_Locus_6899_Transcript_8/13_Confidence_0.389_Length_1994,<br>Sample6_Locus_10875_Transcript_2/10_Confidence_0.167_Length_1095,<br>Sample3_Locus_24964_Transcript_1/1_Confidence_0.000_Length_1088,<br>Sample6_Locus_8953_Transcript_13/14_Confidence_0.143_Length_4871 |
|--------------------------------|----------|---|---------------------------------------------------------------------------------------------------------------------------------------------------------------------------------------------------------------------------------------------------------------------------------|---------------------------------------|--------------------------------------------------------------------------------------------------------------------------------------------------------------------------------------------------------------------------------------------------------------------------------------------------------------------------------------------------------------------------------------------------------------------------------------------------------------------------------------------------------------------------------------------------------------------------------------------------------------------------------------------------------------------------------------------------------------------------------------------------------------------------------------------------------------------------------------------------------------------------------------------------------------------------------------------------------------------------------------------------------------------------------------------------------------------------------------------------------------------------------------------------------------------------------------------------------------------------------------------------------------------------------------------------------------------------------------------------------------------------|

|                                               |          |   |                                                                                                                                                                                                                                                                         |                           |                                                                                                                                                                                                                                                                                                                                                                                                                                                                                                                                                                                                                                                                                                                                                                                                                                                                                                                                                                                                                                                                                                                                                                                                                                                                                                                                                                    |
|-----------------------------------------------|----------|---|-------------------------------------------------------------------------------------------------------------------------------------------------------------------------------------------------------------------------------------------------------------------------|---------------------------|--------------------------------------------------------------------------------------------------------------------------------------------------------------------------------------------------------------------------------------------------------------------------------------------------------------------------------------------------------------------------------------------------------------------------------------------------------------------------------------------------------------------------------------------------------------------------------------------------------------------------------------------------------------------------------------------------------------------------------------------------------------------------------------------------------------------------------------------------------------------------------------------------------------------------------------------------------------------------------------------------------------------------------------------------------------------------------------------------------------------------------------------------------------------------------------------------------------------------------------------------------------------------------------------------------------------------------------------------------------------|
| <b>Nicotinate and nicotinamide metabolism</b> | map00760 | 9 | ec:3.6.1.9 diphosphatase, ec:4.1.3.32 lyase, ec:2.7.1.23 kinase, ec:2.7.7.1 adenylyltransferase, ec:3.6.1.22 diphosphatase, ec:1.4.3.16 oxidase, ec:2.7.7.18 adenylyltransferase, ec:1.6.1.1 transhydrogenase (Sispecific), ec:1.6.1.2 transhydrogenase (Re/Sispecific) | 5, 1, 1, 1, 1, 1, 2, 4, 4 | Sample6_Locus_1849_Transcript_4/6_Confidence_0.429_Length_866, Sample3_Locus_345_Transcript_6/8_Confidence_0.455_Length_1801, SampleTS3_Locus_5573_Transcript_4/5_Confidence_0.333_Length_940, Sample3_Locus_10699_Transcript_3/4_Confidence_0.400_Length_957, Sample3_Locus_27182_Transcript_2/3_Confidence_0.250_Length_1010, Sample6_Locus_3001_Transcript_26/36_Confidence_0.070_Length_1469, SampleTS1_Locus_12062_Transcript_1/1_Confidence_0.000_Length_1207, SampleTS3_Locus_2424_Transcript_35/36_Confidence_0.000_Length_1314, Sample3_Locus_345_Transcript_6/8_Confidence_0.455_Length_1801, SampleTS1_Locus_1041_Transcript_1/5_Confidence_0.400_Length_2190, SampleTS2_Locus_1249_Transcript_11/12_Confidence_0.300_Length_1726, SampleTS3_Locus_2424_Transcript_35/36_Confidence_0.000_Length_1314, SampleTS3_Locus_5019_Transcript_18/23_Confidence_0.338_Length_1167, SampleTS1_Locus_1464_Transcript_2/3_Confidence_0.333_Length_2125, Sample3_Locus_1308_Transcript_4/13_Confidence_0.107_Length_1527, SampleTS1_Locus_1287_Transcript_1/3_Confidence_0.714_Length_4056, SampleTS3_Locus_5019_Transcript_18/23_Confidence_0.338_Length_1167, SampleTS1_Locus_1464_Transcript_2/3_Confidence_0.333_Length_2125, Sample3_Locus_1308_Transcript_4/13_Confidence_0.107_Length_1527, SampleTS1_Locus_1287_Transcript_1/3_Confidence_0.714_Length_4056 |
|-----------------------------------------------|----------|---|-------------------------------------------------------------------------------------------------------------------------------------------------------------------------------------------------------------------------------------------------------------------------|---------------------------|--------------------------------------------------------------------------------------------------------------------------------------------------------------------------------------------------------------------------------------------------------------------------------------------------------------------------------------------------------------------------------------------------------------------------------------------------------------------------------------------------------------------------------------------------------------------------------------------------------------------------------------------------------------------------------------------------------------------------------------------------------------------------------------------------------------------------------------------------------------------------------------------------------------------------------------------------------------------------------------------------------------------------------------------------------------------------------------------------------------------------------------------------------------------------------------------------------------------------------------------------------------------------------------------------------------------------------------------------------------------|



|                                          |          |   |                                                                                                                                                                                                                                                                                                                                 |                                       |                                                                                                                                                                                                                                                                                                                                                                                                                                                                                                                                                                                                                                                                                                                                                                                                                                                                                                                                                                                                                                                                                                                                                                                                                                                                                                                                                                                                                                                                                                                                                                                    |
|------------------------------------------|----------|---|---------------------------------------------------------------------------------------------------------------------------------------------------------------------------------------------------------------------------------------------------------------------------------------------------------------------------------|---------------------------------------|------------------------------------------------------------------------------------------------------------------------------------------------------------------------------------------------------------------------------------------------------------------------------------------------------------------------------------------------------------------------------------------------------------------------------------------------------------------------------------------------------------------------------------------------------------------------------------------------------------------------------------------------------------------------------------------------------------------------------------------------------------------------------------------------------------------------------------------------------------------------------------------------------------------------------------------------------------------------------------------------------------------------------------------------------------------------------------------------------------------------------------------------------------------------------------------------------------------------------------------------------------------------------------------------------------------------------------------------------------------------------------------------------------------------------------------------------------------------------------------------------------------------------------------------------------------------------------|
| <b>Ascorbate and aldarate metabolism</b> | map00053 | 9 | ec:2.7.7.64<br>uridylyltransferase,<br>ec:2.7.7.44<br>uridylyltransferase,<br>ec:1.2.1.3<br>dehydrogenase (NAD+),<br>ec:1.11.1.11<br>peroxidase,<br>ec:1.1.1.19<br>reductase,<br>ec:1.1.1.22<br>6dehydrogenase,<br>ec:2.4.1.17<br>1naphthol glucuronyltransferase,<br>ec:5.1.3.18<br>3,5epimerase,<br>ec:1.13.99.1<br>oxygenase | 5, 1,<br>6, 2,<br>1, 2,<br>3, 1,<br>1 | SampleTS3_Locus_2330_Transcript_4/4_Confidence_0.000_Length_1686,<br>SampleTS1_Locus_16292_Transcript_4/5_Confidence_0.600_Length_1341<br>, Sample3_Locus_4208_Transcript_8/15_Confidence_0.091_Length_2117,<br>Sample3_Locus_40_Transcript_1/1_Confidence_0.000_Length_1702,<br>Sample3_Locus_14770_Transcript_1/1_Confidence_0.000_Length_1819,<br>SampleTS3_Locus_2330_Transcript_4/4_Confidence_0.000_Length_1686,<br>SampleTS3_Locus_23038_Transcript_2/3_Confidence_0.333_Length_1864<br>,<br>SampleTS2_Locus_4874_Transcript_6/12_Confidence_0.158_Length_1042<br>, Sample3_Locus_23176_Transcript_2/3_Confidence_0.333_Length_1282,<br>SampleTS1_Locus_5373_Transcript_26/33_Confidence_0.065_Length_1620,<br>Sample6_Locus_12695_Transcript_1/2_Confidence_0.333_Length_2218,<br>SampleTS3_Locus_23264_Transcript_1/3_Confidence_0.500_Length_845,<br>SampleTS1_Locus_6669_Transcript_3/3_Confidence_0.200_Length_979,<br>SampleTS1_Locus_1282_Transcript_9/25_Confidence_0.318_Length_1204<br>,<br>SampleTS3_Locus_8149_Transcript_4/10_Confidence_0.118_Length_927,<br>SampleTS3_Locus_1975_Transcript_19/64_Confidence_0.064_Length_546<br>, SampleTS2_Locus_4_Transcript_35/36_Confidence_0.021_Length_1580,<br>Sample6_Locus_9455_Transcript_3/4_Confidence_0.200_Length_1370,<br>SampleTS1_Locus_4303_Transcript_9/11_Confidence_0.167_Length_1464<br>,<br>Sample6_Locus_8395_Transcript_14/17_Confidence_0.508_Length_1568,<br>Sample3_Locus_22932_Transcript_1/1_Confidence_0.000_Length_1277,<br>Sample3_Locus_12288_Transcript_5/8_Confidence_0.375_Length_1453 |
|------------------------------------------|----------|---|---------------------------------------------------------------------------------------------------------------------------------------------------------------------------------------------------------------------------------------------------------------------------------------------------------------------------------|---------------------------------------|------------------------------------------------------------------------------------------------------------------------------------------------------------------------------------------------------------------------------------------------------------------------------------------------------------------------------------------------------------------------------------------------------------------------------------------------------------------------------------------------------------------------------------------------------------------------------------------------------------------------------------------------------------------------------------------------------------------------------------------------------------------------------------------------------------------------------------------------------------------------------------------------------------------------------------------------------------------------------------------------------------------------------------------------------------------------------------------------------------------------------------------------------------------------------------------------------------------------------------------------------------------------------------------------------------------------------------------------------------------------------------------------------------------------------------------------------------------------------------------------------------------------------------------------------------------------------------|

|                                  |          |   |                                                                                                                                                                                                                             |                                  |                                                                                                                                                                                                                                                                                                                                                                                                                                                                                                                                                                                                                                                                                                                                                                                                                                                                                                                                                                                                                                                                                                                                                                                                                                                                                                                                                                                                                                                                                                                                                                                                                                                                                                                                                                                                                                                                                                                                                                                                                                                         |
|----------------------------------|----------|---|-----------------------------------------------------------------------------------------------------------------------------------------------------------------------------------------------------------------------------|----------------------------------|---------------------------------------------------------------------------------------------------------------------------------------------------------------------------------------------------------------------------------------------------------------------------------------------------------------------------------------------------------------------------------------------------------------------------------------------------------------------------------------------------------------------------------------------------------------------------------------------------------------------------------------------------------------------------------------------------------------------------------------------------------------------------------------------------------------------------------------------------------------------------------------------------------------------------------------------------------------------------------------------------------------------------------------------------------------------------------------------------------------------------------------------------------------------------------------------------------------------------------------------------------------------------------------------------------------------------------------------------------------------------------------------------------------------------------------------------------------------------------------------------------------------------------------------------------------------------------------------------------------------------------------------------------------------------------------------------------------------------------------------------------------------------------------------------------------------------------------------------------------------------------------------------------------------------------------------------------------------------------------------------------------------------------------------------------|
| <b>Oxidative phosphorylation</b> | map00190 | 8 | ec:2.7.4.1 kinase,<br>ec:3.6.1.1 diphosphatase,<br>ec:1.3.5.1 dehydrogenase,<br>ec:3.6.3.6 ATPase,<br>ec:1.9.3.1 oxidase,<br>ec:1.6.5.3 reductase (H+translocating),<br>ec:1.10.2.2 reductase,<br>ec:1.6.99.3 dehydrogenase | 1, 2,<br>1, 3,<br>3, 7,<br>2, 10 | Sample6_Locus_14073_Transcript_9/19_Confidence_0.260_Length_829,<br>SampleTS2_Locus_5041_Transcript_4/5_Confidence_0.500_Length_756,<br>Sample6_Locus_485_Transcript_4/7_Confidence_0.400_Length_2774,<br>SampleTS2_Locus_54_Transcript_4/10_Confidence_0.083_Length_1374,<br>Sample3_Locus_450_Transcript_9/16_Confidence_0.476_Length_3424,<br>Sample6_Locus_4460_Transcript_7/9_Confidence_0.417_Length_984,<br>SampleTS1_Locus_1128_Transcript_3/3_Confidence_0.000_Length_491,<br>SampleTS3_Locus_1840_Transcript_3/3_Confidence_0.000_Length_1701,<br>SampleTS1_Locus_3847_Transcript_1/1_Confidence_0.000_Length_1612,<br>SampleTS1_Locus_1911_Transcript_1/1_Confidence_0.000_Length_1757,<br>SampleTS1_Locus_9950_Transcript_2/3_Confidence_0.667_Length_1116,<br>SampleTS1_Locus_6265_Transcript_1/4_Confidence_0.200_Length_1674,<br>Sample6_Locus_27578_Transcript_1/1_Confidence_0.000_Length_652,<br>SampleTS2_Locus_12057_Transcript_2/4_Confidence_0.167_Length_2549,<br>SampleTS3_Locus_3197_Transcript_1/1_Confidence_0.000_Length_435,<br>SampleTS1_Locus_1582_Transcript_4/5_Confidence_0.400_Length_1930,<br>SampleTS2_Locus_590_Transcript_3/3_Confidence_0.000_Length_1259,<br>Sample1_Locus_11514_Transcript_9/11_Confidence_0.161_Length_1131,<br>SampleTS2_Locus_3852_Transcript_3/5_Confidence_0.200_Length_807,<br>SampleTS1_Locus_9016_Transcript_1/2_Confidence_0.333_Length_766,<br>SampleTS1_Locus_9950_Transcript_2/3_Confidence_0.667_Length_1116,<br>SampleTS1_Locus_6265_Transcript_1/4_Confidence_0.200_Length_1674,<br>Sample6_Locus_27578_Transcript_1/1_Confidence_0.000_Length_652,<br>SampleTS2_Locus_12057_Transcript_2/4_Confidence_0.167_Length_2549,<br>SampleTS3_Locus_3197_Transcript_1/1_Confidence_0.000_Length_435,<br>SampleTS1_Locus_1582_Transcript_4/5_Confidence_0.400_Length_1930,<br>Sample6_Locus_2760_Transcript_3/6_Confidence_0.100_Length_1949,<br>SampleTS2_Locus_590_Transcript_3/3_Confidence_0.000_Length_1259,<br>SampleTS2_Locus_1483_Transcript_3/13_Confidence_0.364_Length_1620 |
| <b>Biotin metabolism</b>         | map00780 | 8 | ec:2.8.1.6 synthase,<br>ec:1.1.1.100 reductase,<br>ec:2.3.1.179 synthase II,<br>ec:6.3.4.10 (ATPhydrolysing)] ligase,<br>ec:6.3.4.11 ligase,<br>ec:6.3.4.15 ligase,<br>ec:2.3.1.41 synthase I,<br>ec:2.3.1.47 synthase      | 1, 1,<br>1, 1,<br>1, 1,<br>2, 2  | SampleTS1_Locus_7045_Transcript_3/6_Confidence_0.286_Length_1062,<br>Sample6_Locus_8953_Transcript_13/14_Confidence_0.143_Length_4871,<br>Sample3_Locus_24964_Transcript_1/1_Confidence_0.000_Length_1088,<br>SampleTS1_Locus_10161_Transcript_4/4_Confidence_0.000_Length_1433<br>,<br>SampleTS1_Locus_10161_Transcript_4/4_Confidence_0.000_Length_1433<br>,<br>SampleTS1_Locus_10161_Transcript_4/4_Confidence_0.000_Length_1433<br>,<br>Sample3_Locus_24964_Transcript_1/1_Confidence_0.000_Length_1088,<br>Sample6_Locus_8953_Transcript_13/14_Confidence_0.143_Length_4871,<br>Sample6_Locus_13557_Transcript_4/6_Confidence_0.200_Length_1530,<br>SampleTS2_Locus_13131_Transcript_7/10_Confidence_0.083_Length_1731                                                                                                                                                                                                                                                                                                                                                                                                                                                                                                                                                                                                                                                                                                                                                                                                                                                                                                                                                                                                                                                                                                                                                                                                                                                                                                                             |

|                                                |          |   |                                                                                                                                                                                                                                    |                  |                                                                                                                                                                                                                                                                                                                                                                                                                                                                                                                                                                                                                                                                                                                                                                                                                                                                                                                                                                                                                                                                                                                                                                                                                               |
|------------------------------------------------|----------|---|------------------------------------------------------------------------------------------------------------------------------------------------------------------------------------------------------------------------------------|------------------|-------------------------------------------------------------------------------------------------------------------------------------------------------------------------------------------------------------------------------------------------------------------------------------------------------------------------------------------------------------------------------------------------------------------------------------------------------------------------------------------------------------------------------------------------------------------------------------------------------------------------------------------------------------------------------------------------------------------------------------------------------------------------------------------------------------------------------------------------------------------------------------------------------------------------------------------------------------------------------------------------------------------------------------------------------------------------------------------------------------------------------------------------------------------------------------------------------------------------------|
| <b>Biosynthesis of unsaturated fatty acids</b> | map01040 | 8 | ec:1.1.1.100 reductase, ec:2.3.1.16 Cacyltransferase, ec:1.3.1.38 reductase (NADPH), ec:4.2.1.17 hydratase, ec:1.1.1.211 dehydrogenase, ec:1.14.19.3 6desaturase, ec:1.14.19.1 9desaturase, ec:1.3.3.6 oxidase                     | 1, 1, 1, 2       | Sample6_Locus_8953_Transcript_13/14_Confidence_0.143_Length_4871, SampleTS2_Locus_1750_Transcript_17/20_Confidence_0.182_Length_1568, SampleTS1_Locus_11137_Transcript_3/4_Confidence_0.500_Length_1746, SampleTS1_Locus_789_Transcript_9/11_Confidence_0.238_Length_2300, Sample3_Locus_5282_Transcript_2/7_Confidence_0.700_Length_1266, SampleTS3_Locus_11808_Transcript_9/11_Confidence_0.565_Length_1006, SampleTS2_Locus_20864_Transcript_2/3_Confidence_0.667_Length_860, SampleTS2_Locus_20864_Transcript_2/3_Confidence_0.667_Length_860, SampleTS2_Locus_1750_Transcript_17/20_Confidence_0.182_Length_1568, Sample3_Locus_6833_Transcript_1/1_Confidence_0.000_Length_1688                                                                                                                                                                                                                                                                                                                                                                                                                                                                                                                                         |
| <b>Histidine metabolism</b>                    | map00340 | 8 | ec:4.1.1.22 decarboxylase, ec:3.6.1.31 diphosphatase, ec:2.6.1.9 transaminase, ec:4.2.1.19 dehydratase, ec:1.2.1.5 dehydrogenase [NAD(P)+], ec:1.2.1.3 dehydrogenase (NAD+), ec:1.1.1.23 dehydrogenase, ec:3.5.4.19 cyclohydrolase | 1, 2, 1, 6, 1, 3 | Sample1_Locus_26122_Transcript_1/1_Confidence_0.000_Length_755, Sample6_Locus_2319_Transcript_10/15_Confidence_0.280_Length_1298, SampleTS2_Locus_7249_Transcript_3/5_Confidence_0.706_Length_812, SampleTS1_Locus_7721_Transcript_1/1_Confidence_0.000_Length_1610, Sample1_Locus_26802_Transcript_1/2_Confidence_0.667_Length_439, Sample6_Locus_13664_Transcript_1/2_Confidence_0.333_Length_862, Sample6_Locus_10525_Transcript_3/19_Confidence_0.244_Length_681, SampleTS1_Locus_5373_Transcript_26/33_Confidence_0.065_Length_1620, SampleTS3_Locus_23038_Transcript_2/3_Confidence_0.333_Length_1864, SampleTS2_Locus_4874_Transcript_6/12_Confidence_0.158_Length_1042, Sample3_Locus_23176_Transcript_2/3_Confidence_0.333_Length_1282, SampleTS1_Locus_5373_Transcript_26/33_Confidence_0.065_Length_1620, Sample6_Locus_12695_Transcript_1/2_Confidence_0.333_Length_2218, SampleTS3_Locus_23264_Transcript_1/3_Confidence_0.500_Length_845, SampleTS1_Locus_7721_Transcript_1/1_Confidence_0.000_Length_1610, Sample6_Locus_2319_Transcript_10/15_Confidence_0.280_Length_1298, SampleTS2_Locus_7249_Transcript_3/5_Confidence_0.706_Length_812, SampleTS1_Locus_7721_Transcript_1/1_Confidence_0.000_Length_1610 |

|                                                    |          |   |                                                                                                                                                                                                              |                                  |                                                                                                                                                                                                                                                                                                                                                                                                                                                                                                                                                                                                                                                                                                                                                                                                                                                                                                                                                                                                                                                                                                                                                                                                                                                                                                                                                                                                                                                                                                                                                                                                                                                                                                                                                                                                                                                                                                                                                                                                                                                                                                                                                                                                                                                                                                                                                                                                                                                                                                                                                                                                                                                                                                                                                                                                                                                                                                                                                                                                                                                                                                                                                                                                                                                                                                                                                                                                                                                                                                                                                               |
|----------------------------------------------------|----------|---|--------------------------------------------------------------------------------------------------------------------------------------------------------------------------------------------------------------|----------------------------------|---------------------------------------------------------------------------------------------------------------------------------------------------------------------------------------------------------------------------------------------------------------------------------------------------------------------------------------------------------------------------------------------------------------------------------------------------------------------------------------------------------------------------------------------------------------------------------------------------------------------------------------------------------------------------------------------------------------------------------------------------------------------------------------------------------------------------------------------------------------------------------------------------------------------------------------------------------------------------------------------------------------------------------------------------------------------------------------------------------------------------------------------------------------------------------------------------------------------------------------------------------------------------------------------------------------------------------------------------------------------------------------------------------------------------------------------------------------------------------------------------------------------------------------------------------------------------------------------------------------------------------------------------------------------------------------------------------------------------------------------------------------------------------------------------------------------------------------------------------------------------------------------------------------------------------------------------------------------------------------------------------------------------------------------------------------------------------------------------------------------------------------------------------------------------------------------------------------------------------------------------------------------------------------------------------------------------------------------------------------------------------------------------------------------------------------------------------------------------------------------------------------------------------------------------------------------------------------------------------------------------------------------------------------------------------------------------------------------------------------------------------------------------------------------------------------------------------------------------------------------------------------------------------------------------------------------------------------------------------------------------------------------------------------------------------------------------------------------------------------------------------------------------------------------------------------------------------------------------------------------------------------------------------------------------------------------------------------------------------------------------------------------------------------------------------------------------------------------------------------------------------------------------------------------------------------|
| <b>Valine, leucine and isoleucine biosynthesis</b> | map00290 | 7 | ec:2.3.3.13 synthase,<br>ec:4.2.1.9 dehydratase,<br>ec:2.2.1.6 synthase,<br>ec:2.6.1.42 transaminase,<br>ec:4.2.1.33 dehydratase,<br>ec:1.1.1.86 reductoisomerase (NADP+),<br>ec:1.1.1.85 dehydrogenase      | 1, 1,<br>1, 2,<br>1, 1,<br>1     | Sample1_Locus_7894_Transcript_1/3_Confidence_0.250_Length_2075,<br>Sample1_Locus_2272_Transcript_43/67_Confidence_0.374_Length_2859,<br>Sample3_Locus_4596_Transcript_3/6_Confidence_0.400_Length_1157,<br>Sample1_Locus_18777_Transcript_2/4_Confidence_0.923_Length_1416,<br>Sample3_Locus_5952_Transcript_4/4_Confidence_0.000_Length_2586,<br>Sample6_Locus_7492_Transcript_8/10_Confidence_0.105_Length_2216,<br>Sample1_Locus_2001_Transcript_4/7_Confidence_0.600_Length_1686,<br>SampleTS2_Locus_3967_Transcript_1/4_Confidence_0.667_Length_1445                                                                                                                                                                                                                                                                                                                                                                                                                                                                                                                                                                                                                                                                                                                                                                                                                                                                                                                                                                                                                                                                                                                                                                                                                                                                                                                                                                                                                                                                                                                                                                                                                                                                                                                                                                                                                                                                                                                                                                                                                                                                                                                                                                                                                                                                                                                                                                                                                                                                                                                                                                                                                                                                                                                                                                                                                                                                                                                                                                                                     |
| <b>Aminobenzoate degradation</b>                   | map00627 | 7 | ec:3.6.1.7 acetylphosphatase, ec:3.1.3.41 nitrophenyl phosphatase,<br>ec:3.5.5.1 acetonitrilase,<br>ec:4.2.1.84 hydratase,<br>ec:2.8.3.8 CoAtransferase,<br>ec:4.2.1.17 hydratase,<br>ec:3.5.1.4 acylamidase | 1,<br>66,<br>1, 1,<br>1, 2,<br>2 | SampleTS3_Locus_13938_Transcript_1/2_Confidence_0.333_Length_655,<br>SampleTS3_Locus_1236_Transcript_8/14_Confidence_0.379_Length_696,<br>SampleTS1_Locus_1994_Transcript_14/23_Confidence_0.470_Length_2041,<br>SampleTS1_Locus_5854_Transcript_5/5_Confidence_0.400_Length_861,<br>Sample3_Locus_4609_Transcript_5/8_Confidence_0.444_Length_1430,<br>SampleTS3_Locus_6160_Transcript_3/3_Confidence_0.167_Length_2057,<br>SampleTS3_Locus_1630_Transcript_4/8_Confidence_0.500_Length_1635,<br>SampleTS2_Locus_4720_Transcript_3/7_Confidence_0.667_Length_1404,<br>SampleTS1_Locus_10554_Transcript_2/2_Confidence_0.000_Length_719,<br>Sample3_Locus_3349_Transcript_2/6_Confidence_0.556_Length_1203,<br>Sample6_Locus_2283_Transcript_7/17_Confidence_0.225_Length_1818,<br>Sample3_Locus_5932_Transcript_3/4_Confidence_0.571_Length_501,<br>SampleTS3_Locus_13512_Transcript_1/3_Confidence_0.333_Length_1321,<br>SampleTS2_Locus_1774_Transcript_4/5_Confidence_0.500_Length_990,<br>SampleTS2_Locus_549_Transcript_10/36_Confidence_0.207_Length_1084,<br>Sample3_Locus_14090_Transcript_2/4_Confidence_0.714_Length_1345,<br>Sample6_Locus_5727_Transcript_3/3_Confidence_0.000_Length_2301,<br>SampleTS3_Locus_5284_Transcript_10/12_Confidence_0.450_Length_1002,<br>SampleTS1_Locus_2055_Transcript_1/2_Confidence_0.667_Length_939,<br>SampleTS2_Locus_8418_Transcript_9/12_Confidence_0.559_Length_1395,<br>Sample3_Locus_3056_Transcript_6/6_Confidence_0.000_Length_1859,<br>Sample3_Locus_13102_Transcript_1/2_Confidence_0.333_Length_1552,<br>SampleTS3_Locus_9298_Transcript_1/10_Confidence_0.238_Length_793,<br>Sample3_Locus_2217_Transcript_22/26_Confidence_0.080_Length_870,<br>SampleTS1_Locus_2823_Transcript_2/10_Confidence_0.444_Length_2044,<br>SampleTS3_Locus_13352_Transcript_4/6_Confidence_0.600_Length_2895,<br>Sample6_Locus_4221_Transcript_5/15_Confidence_0.231_Length_1620,<br>Sample3_Locus_23182_Transcript_4/4_Confidence_0.000_Length_3946,<br>SampleTS2_Locus_4899_Transcript_2/5_Confidence_0.357_Length_658,<br>Sample6_Locus_594_Transcript_17/21_Confidence_0.471_Length_4353,<br>SampleTS1_Locus_4566_Transcript_4/4_Confidence_0.000_Length_2764,<br>SampleTS2_Locus_2599_Transcript_3/9_Confidence_0.091_Length_4008,<br>SampleTS1_Locus_397_Transcript_66/78_Confidence_0.022_Length_711,<br>SampleTS1_Locus_26651_Transcript_1/1_Confidence_0.000_Length_1107,<br>SampleTS3_Locus_12636_Transcript_2/2_Confidence_0.333_Length_583,<br>Sample6_Locus_11896_Transcript_2/5_Confidence_0.500_Length_1410,<br>SampleTS2_Locus_549_Transcript_23/36_Confidence_0.110_Length_766,<br>SampleTS1_Locus_9567_Transcript_1/2_Confidence_0.667_Length_1197,<br>SampleTS2_Locus_13566_Transcript_1/3_Confidence_0.750_Length_1476,<br>Sample6_Locus_6071_Transcript_1/2_Confidence_0.333_Length_2182,<br>Sample6_Locus_11496_Transcript_4/7_Confidence_0.250_Length_1518,<br>Sample3_Locus_5257_Transcript_3/8_Confidence_0.333_Length_2904,<br>Sample6_Locus_11565_Transcript_7/13_Confidence_0.097_Length_1502,<br>Sample1_Locus_27168_Transcript_1/2_Confidence_1.000_Length_653,<br>Sample6_Locus_24750_Transcript_4/9_Confidence_0.222_Length_785,<br>SampleTS2_Locus_23786_Transcript_1/1_Confidence_0.000_Length_866,<br>Sample3_Locus_10262_Transcript_4/5_Confidence_0.062_Length_1337,<br>SampleTS2_Locus_2994_Transcript_7/9_Confidence_0.235_Length_2922,<br>Sample6_Locus_10381_Transcript_4/5_Confidence_0.333_Length_1065,<br>Sample3_Locus_2926_Transcript_2/3_Confidence_0.750_Length_1774, |

|                                      |          |   |                                                                                                                                                                                                                                  |                            |                                                                                                                                                                                                                                                                                                                                                                                                                                                                                                                                                                                                                                                                                                                                                                                                                                                                                                                                                                                                                                                                                                                                                                                                                                                                                                                                                                                                                                                                                                                                                                                                                                                             |
|--------------------------------------|----------|---|----------------------------------------------------------------------------------------------------------------------------------------------------------------------------------------------------------------------------------|----------------------------|-------------------------------------------------------------------------------------------------------------------------------------------------------------------------------------------------------------------------------------------------------------------------------------------------------------------------------------------------------------------------------------------------------------------------------------------------------------------------------------------------------------------------------------------------------------------------------------------------------------------------------------------------------------------------------------------------------------------------------------------------------------------------------------------------------------------------------------------------------------------------------------------------------------------------------------------------------------------------------------------------------------------------------------------------------------------------------------------------------------------------------------------------------------------------------------------------------------------------------------------------------------------------------------------------------------------------------------------------------------------------------------------------------------------------------------------------------------------------------------------------------------------------------------------------------------------------------------------------------------------------------------------------------------|
|                                      |          |   |                                                                                                                                                                                                                                  |                            | <p>SampleTS3_Locus_23494_Transcript_1/1_Confidence_0.000_Length_1156 , Sample3_Locus_23102_Transcript_1/2_Confidence_0.667_Length_1067, Sample6_Locus_8346_Transcript_7/13_Confidence_0.118_Length_1292, SampleTS1_Locus_12977_Transcript_4/6_Confidence_0.429_Length_1160 ,</p> <p>SampleTS1_Locus_6027_Transcript_7/14_Confidence_0.160_Length_504, Sample3_Locus_22654_Transcript_1/1_Confidence_0.000_Length_1356, Sample6_Locus_1159_Transcript_30/32_Confidence_0.027_Length_1920, SampleTS3_Locus_2277_Transcript_3/5_Confidence_0.400_Length_1847, SampleTS1_Locus_30500_Transcript_2/2_Confidence_0.850_Length_548, Sample1_Locus_18291_Transcript_1/1_Confidence_0.000_Length_647, Sample6_Locus_30120_Transcript_2/3_Confidence_0.667_Length_1321, SampleTS2_Locus_3992_Transcript_15/16_Confidence_0.143_Length_1808, SampleTS1_Locus_11573_Transcript_5/10_Confidence_0.211_Length_1117, Sample1_Locus_25057_Transcript_2/6_Confidence_0.727_Length_1459, SampleTS2_Locus_549_Transcript_22/36_Confidence_0.134_Length_768, Sample3_Locus_2632_Transcript_1/1_Confidence_0.000_Length_1846, SampleTS3_Locus_11395_Transcript_5/6_Confidence_0.111_Length_2047 , Sample3_Locus_27182_Transcript_2/3_Confidence_0.250_Length_1010, Sample3_Locus_12929_Transcript_1/1_Confidence_0.000_Length_1898, SampleTS2_Locus_1750_Transcript_17/20_Confidence_0.182_Length_1568, SampleTS1_Locus_789_Transcript_9/11_Confidence_0.238_Length_2300, Sample3_Locus_5282_Transcript_2/7_Confidence_0.700_Length_1266, Sample6_Locus_14763_Transcript_11/12_Confidence_0.182_Length_1117 , Sample6_Locus_19655_Transcript_1/3_Confidence_0.667_Length_978</p> |
| <b>Inositol phosphate metabolism</b> | map00562 | 7 | <p>ec:2.7.1.127 3kinase,</p> <p>ec:2.7.1.67 4kinase,</p> <p>ec:2.7.1.68 5kinase,</p> <p>ec:3.1.3.36 5phosphatase,</p> <p>ec:1.2.1.18 dehydrogenase (acetylating),</p> <p>ec:2.7.1.137 3kinase,</p> <p>ec:1.13.99.1 oxygenase</p> | <p>1, 4, 3, 1, 1, 1, 1</p> | <p>SampleTS2_Locus_1265_Transcript_3/9_Confidence_0.588_Length_949, Sample1_Locus_23868_Transcript_1/1_Confidence_0.000_Length_3026, Sample6_Locus_8424_Transcript_5/6_Confidence_0.143_Length_3891, SampleTS1_Locus_4904_Transcript_5/8_Confidence_0.381_Length_1961, SampleTS1_Locus_4990_Transcript_6/7_Confidence_0.056_Length_1270, Sample6_Locus_12499_Transcript_26/36_Confidence_0.183_Length_587, Sample6_Locus_16639_Transcript_4/7_Confidence_0.143_Length_2715, Sample1_Locus_24371_Transcript_4/4_Confidence_0.000_Length_805, SampleTS3_Locus_5284_Transcript_10/12_Confidence_0.450_Length_1002, SampleTS3_Locus_23038_Transcript_2/3_Confidence_0.333_Length_1864 , SampleTS3_Locus_5967_Transcript_6/11_Confidence_0.091_Length_1939 , Sample3_Locus_12288_Transcript_5/8_Confidence_0.375_Length_1453</p>                                                                                                                                                                                                                                                                                                                                                                                                                                                                                                                                                                                                                                                                                                                                                                                                                                 |

|                                  |          |   |                                                                                                                                                                                                                                   |                      |                                                                                                                                                                                                                                                                                                                                                                                                                                                                                                                                                                                                                                                                                                                                                                                                                                                                                                                                                                                                                                                                                                                                                                                                                                                                                                                                                                                                                                                                                                                                                                                                                                                                                                                                                                                                                                                                                                                                                                                                                                                                                                                                                                                                                                                                                                                                                                                                                                                                                                                                     |
|----------------------------------|----------|---|-----------------------------------------------------------------------------------------------------------------------------------------------------------------------------------------------------------------------------------|----------------------|-------------------------------------------------------------------------------------------------------------------------------------------------------------------------------------------------------------------------------------------------------------------------------------------------------------------------------------------------------------------------------------------------------------------------------------------------------------------------------------------------------------------------------------------------------------------------------------------------------------------------------------------------------------------------------------------------------------------------------------------------------------------------------------------------------------------------------------------------------------------------------------------------------------------------------------------------------------------------------------------------------------------------------------------------------------------------------------------------------------------------------------------------------------------------------------------------------------------------------------------------------------------------------------------------------------------------------------------------------------------------------------------------------------------------------------------------------------------------------------------------------------------------------------------------------------------------------------------------------------------------------------------------------------------------------------------------------------------------------------------------------------------------------------------------------------------------------------------------------------------------------------------------------------------------------------------------------------------------------------------------------------------------------------------------------------------------------------------------------------------------------------------------------------------------------------------------------------------------------------------------------------------------------------------------------------------------------------------------------------------------------------------------------------------------------------------------------------------------------------------------------------------------------------|
| <b>Lysine degradation</b>        | map00310 | 7 | ec:2.3.1.61 succinyltransferase, ec:2.1.1.43 Nmethyltransferase, ec:4.2.1.17 hydratase, ec:1.2.1.3 dehydrogenase (NAD+), ec:2.3.1.9 Cacetyltransferase, ec:1.1.1.35 dehydrogenase, ec:1.2.4.2 dehydrogenase (succinyltransfering) | 1, 23, 2, 6, 1, 3, 1 | Sample3_Locus_4770_Transcript_12/16_Confidence_0.420_Length_1753, SampleTS1_Locus_7466_Transcript_1/2_Confidence_0.333_Length_1169, Sample3_Locus_6969_Transcript_6/8_Confidence_0.762_Length_870, Sample6_Locus_2648_Transcript_9/13_Confidence_0.414_Length_1634, Sample6_Locus_1130_Transcript_35/37_Confidence_0.057_Length_983, Sample6_Locus_2189_Transcript_8/13_Confidence_0.500_Length_5625, SampleTS2_Locus_4573_Transcript_1/3_Confidence_0.667_Length_881, SampleTS3_Locus_12905_Transcript_2/2_Confidence_0.000_Length_914, SampleTS1_Locus_8400_Transcript_9/12_Confidence_0.536_Length_2582, SampleTS1_Locus_15017_Transcript_4/4_Confidence_0.000_Length_1042, SampleTS3_Locus_6812_Transcript_4/4_Confidence_0.000_Length_3723, SampleTS1_Locus_4326_Transcript_3/6_Confidence_0.125_Length_778, SampleTS2_Locus_2512_Transcript_4/10_Confidence_0.222_Length_1103, SampleTS1_Locus_25422_Transcript_1/1_Confidence_0.000_Length_1767, Sample3_Locus_3137_Transcript_7/8_Confidence_0.071_Length_1158, Sample1_Locus_12494_Transcript_4/6_Confidence_0.333_Length_5696, SampleTS1_Locus_9947_Transcript_4/10_Confidence_0.417_Length_1541, SampleTS3_Locus_10906_Transcript_5/5_Confidence_0.000_Length_3210, Sample6_Locus_6056_Transcript_4/7_Confidence_0.278_Length_663, SampleTS3_Locus_1517_Transcript_6/8_Confidence_0.429_Length_1534, Sample3_Locus_12500_Transcript_5/16_Confidence_0.086_Length_1337, SampleTS1_Locus_2952_Transcript_3/7_Confidence_0.444_Length_2999, Sample6_Locus_3327_Transcript_10/12_Confidence_0.364_Length_5452, Sample3_Locus_7031_Transcript_2/6_Confidence_0.333_Length_4210, SampleTS1_Locus_789_Transcript_9/11_Confidence_0.238_Length_2300, Sample3_Locus_5282_Transcript_2/7_Confidence_0.700_Length_1266, SampleTS3_Locus_23038_Transcript_2/3_Confidence_0.333_Length_1864, SampleTS2_Locus_4874_Transcript_6/12_Confidence_0.158_Length_1042, Sample3_Locus_23176_Transcript_2/3_Confidence_0.333_Length_1282, SampleTS1_Locus_5373_Transcript_26/33_Confidence_0.065_Length_1620, Sample6_Locus_12695_Transcript_1/2_Confidence_0.333_Length_2218, SampleTS3_Locus_23264_Transcript_1/3_Confidence_0.500_Length_845, SampleTS2_Locus_1750_Transcript_17/20_Confidence_0.182_Length_1568, SampleTS1_Locus_789_Transcript_9/11_Confidence_0.238_Length_2300, SampleTS3_Locus_1827_Transcript_3/3_Confidence_0.000_Length_1033, SampleTS3_Locus_11808_Transcript_9/11_Confidence_0.565_Length_1006, SampleTS3_Locus_20806_Transcript_1/1_Confidence_0.000_Length_3106 |
| <b>One carbon pool by folate</b> | map00670 | 7 | ec:6.3.3.2 cycloligase, ec:2.1.2.2 formyltransferase, ec:2.1.2.1 hydroxymethyltransferase, ec:3.5.4.9 cyclohydrolase, ec:2.1.1.13 synthase, ec:3.5.1.10 deformylase, ec:1.5.1.5 dehydrogenase (NADP+)                             | 2, 1, 2, 1, 1, 2, 1  | SampleTS2_Locus_9480_Transcript_1/1_Confidence_0.000_Length_1500, Sample3_Locus_17995_Transcript_3/4_Confidence_0.200_Length_1095, SampleTS2_Locus_12481_Transcript_10/11_Confidence_0.194_Length_1103, Sample1_Locus_3932_Transcript_7/11_Confidence_0.400_Length_1725, SampleTS1_Locus_10618_Transcript_3/4_Confidence_0.400_Length_1517, Sample6_Locus_4997_Transcript_3/6_Confidence_0.429_Length_1455, SampleTS1_Locus_8020_Transcript_2/4_Confidence_0.333_Length_2411, SampleTS2_Locus_12481_Transcript_10/11_Confidence_0.194_Length_1103, SampleTS1_Locus_27797_Transcript_4/4_Confidence_0.800_Length_878, Sample6_Locus_4997_Transcript_3/6_Confidence_0.429_Length_1455                                                                                                                                                                                                                                                                                                                                                                                                                                                                                                                                                                                                                                                                                                                                                                                                                                                                                                                                                                                                                                                                                                                                                                                                                                                                                                                                                                                                                                                                                                                                                                                                                                                                                                                                                                                                                                                 |

|                                                               |          |   |                                                                                                                                                                                                     |                     |                                                                                                                                                                                                                                                                                                                                                                                                                                                                                                                                                                                                                                                                                                                                                                                                    |
|---------------------------------------------------------------|----------|---|-----------------------------------------------------------------------------------------------------------------------------------------------------------------------------------------------------|---------------------|----------------------------------------------------------------------------------------------------------------------------------------------------------------------------------------------------------------------------------------------------------------------------------------------------------------------------------------------------------------------------------------------------------------------------------------------------------------------------------------------------------------------------------------------------------------------------------------------------------------------------------------------------------------------------------------------------------------------------------------------------------------------------------------------------|
| <b>Cyanoamino acid metabolism</b>                             | map00460 | 7 | ec:2.1.2.1 hydroxymethyltransferase, ec:1.14.13.39 synthase (NADPH), ec:6.3.1.1 ligase, ec:3.5.5.1 acetonitrilase, ec:4.4.1.9 synthase, ec:2.3.2.2 glutamyl transpeptidase, ec:3.2.1.21 gentiobiase | 2, 1, 2, 1, 2, 1, 2 | Sample1_Locus_3932_Transcript_7/11_Confidence_0.400_Length_1725, SampleTS1_Locus_10618_Transcript_3/4_Confidence_0.400_Length_1517, Sample1_Locus_25642_Transcript_6/7_Confidence_0.500_Length_1752, Sample6_Locus_5745_Transcript_6/10_Confidence_0.065_Length_1149, Sample6_Locus_7334_Transcript_8/13_Confidence_0.571_Length_1873, Sample3_Locus_27182_Transcript_2/3_Confidence_0.250_Length_1010, Sample6_Locus_5355_Transcript_5/8_Confidence_0.577_Length_1830, SampleTS2_Locus_2923_Transcript_3/4_Confidence_0.333_Length_1277, Sample1_Locus_19449_Transcript_1/1_Confidence_0.000_Length_1704, Sample1_Locus_25240_Transcript_4/4_Confidence_0.429_Length_2225, SampleTS2_Locus_9286_Transcript_1/1_Confidence_0.000_Length_2119                                                       |
| <b>Tropane, piperidine and pyridine alkaloid biosynthesis</b> | map00960 | 6 | ec:2.6.1.57 transaminase, ec:2.6.1.58 transaminase, ec:2.6.1.5 transaminase, ec:2.6.1.9 transaminase, ec:2.6.1.1 transaminase, ec:1.4.3.21 oxidase                                                  | 2, 1, 2, 2, 3, 1    | Sample1_Locus_26802_Transcript_1/2_Confidence_0.667_Length_439, Sample6_Locus_13664_Transcript_1/2_Confidence_0.333_Length_862, Sample6_Locus_22798_Transcript_3/3_Confidence_0.250_Length_666, Sample1_Locus_26802_Transcript_1/2_Confidence_0.667_Length_439, Sample6_Locus_13664_Transcript_1/2_Confidence_0.333_Length_862, Sample1_Locus_26802_Transcript_1/2_Confidence_0.667_Length_439, Sample6_Locus_13664_Transcript_1/2_Confidence_0.333_Length_862, Sample1_Locus_26802_Transcript_1/2_Confidence_0.667_Length_439, Sample1_Locus_26802_Transcript_1/2_Confidence_0.667_Length_439, Sample6_Locus_13664_Transcript_1/2_Confidence_0.333_Length_862, SampleTS2_Locus_6646_Transcript_2/2_Confidence_0.333_Length_1520, Sample1_Locus_4359_Transcript_11/14_Confidence_0.314_Length_2540 |

|                                              |          |   |                                                                                                                                                                                             |                        |                                                                                                                                                                                                                                                                                                                                                                                                                                                                                                                                                                                                                                                                                                                                                                                |
|----------------------------------------------|----------|---|---------------------------------------------------------------------------------------------------------------------------------------------------------------------------------------------|------------------------|--------------------------------------------------------------------------------------------------------------------------------------------------------------------------------------------------------------------------------------------------------------------------------------------------------------------------------------------------------------------------------------------------------------------------------------------------------------------------------------------------------------------------------------------------------------------------------------------------------------------------------------------------------------------------------------------------------------------------------------------------------------------------------|
| <b>Phosphatidylinositol signaling system</b> | map04070 | 6 | ec:2.7.1.127 3kinase,<br>ec:2.7.1.67 4kinase,<br>ec:2.7.1.68 5kinase,<br>ec:3.1.3.36 5phosphatase,<br>ec:2.7.1.137 3kinase,<br>ec:2.7.11.13 kinase C                                        | 1, 4,<br>3, 1,<br>1, 1 | SampleTS2_Locus_1265_Transcript_3/9_Confidence_0.588_Length_949,<br>Sample1_Locus_23868_Transcript_1/1_Confidence_0.000_Length_3026,<br>Sample6_Locus_8424_Transcript_5/6_Confidence_0.143_Length_3891,<br>SampleTS1_Locus_4904_Transcript_5/8_Confidence_0.381_Length_1961,<br>SampleTS1_Locus_4990_Transcript_6/7_Confidence_0.056_Length_1270,<br>Sample6_Locus_12499_Transcript_26/36_Confidence_0.183_Length_587,<br>Sample6_Locus_16639_Transcript_4/7_Confidence_0.143_Length_2715,<br>Sample1_Locus_24371_Transcript_4/4_Confidence_0.000_Length_805,<br>SampleTS3_Locus_5284_Transcript_10/12_Confidence_0.450_Length_1002,<br>SampleTS3_Locus_5967_Transcript_6/11_Confidence_0.091_Length_1939,<br>SampleTS2_Locus_4456_Transcript_5/7_Confidence_0.333_Length_2807 |
| <b>Benzoate degradation</b>                  | map00362 | 6 | ec:2.3.1.16 Cacyltransferase, ec:1.2.1.10 dehydrogenase (acetylating),<br>ec:1.1.1.157 dehydrogenase,<br>ec:4.2.1.17 hydratase,<br>ec:2.3.1.9 Cacetyltransferase, ec:1.1.1.35 dehydrogenase | 1, 2,<br>1, 2,<br>1, 3 | SampleTS2_Locus_1750_Transcript_17/20_Confidence_0.182_Length_1568,<br>SampleTS3_Locus_400_Transcript_6/29_Confidence_0.422_Length_2479,<br>Sample6_Locus_1524_Transcript_26/30_Confidence_0.185_Length_3215,<br>SampleTS3_Locus_1827_Transcript_3/3_Confidence_0.000_Length_1033,<br>SampleTS1_Locus_789_Transcript_9/11_Confidence_0.238_Length_2300,<br>Sample3_Locus_5282_Transcript_2/7_Confidence_0.700_Length_1266,<br>SampleTS2_Locus_1750_Transcript_17/20_Confidence_0.182_Length_1568,<br>SampleTS1_Locus_789_Transcript_9/11_Confidence_0.238_Length_2300,<br>SampleTS3_Locus_1827_Transcript_3/3_Confidence_0.000_Length_1033,<br>SampleTS3_Locus_11808_Transcript_9/11_Confidence_0.565_Length_1006                                                              |
| <b>Fatty acid elongation</b>                 | map00062 | 6 | ec:2.3.1.16 Cacyltransferase, ec:4.2.1.74 hydratase,<br>ec:1.3.1.38 reductase (NADPH),<br>ec:4.2.1.17 hydratase,<br>ec:1.1.1.211 dehydrogenase,<br>ec:1.1.1.35 dehydrogenase                | 1, 1,<br>1, 2,<br>1, 3 | SampleTS2_Locus_1750_Transcript_17/20_Confidence_0.182_Length_1568,<br>SampleTS1_Locus_789_Transcript_9/11_Confidence_0.238_Length_2300,<br>SampleTS1_Locus_11137_Transcript_3/4_Confidence_0.500_Length_1746,<br>SampleTS1_Locus_789_Transcript_9/11_Confidence_0.238_Length_2300,<br>Sample3_Locus_5282_Transcript_2/7_Confidence_0.700_Length_1266,<br>SampleTS3_Locus_11808_Transcript_9/11_Confidence_0.565_Length_1006,<br>SampleTS1_Locus_789_Transcript_9/11_Confidence_0.238_Length_2300,<br>SampleTS3_Locus_1827_Transcript_3/3_Confidence_0.000_Length_1033,<br>SampleTS3_Locus_11808_Transcript_9/11_Confidence_0.565_Length_1006                                                                                                                                  |



|                                           |          |   |                                                                                                                                                                                                                                     |                        |                                                                                                                                                                                                                                                                                                                                                                                                                                                                                                                                                                                                                                                                                                                                                                                                                                                                                                                                                                                                                                                                                                                                                                                                                                                                                     |
|-------------------------------------------|----------|---|-------------------------------------------------------------------------------------------------------------------------------------------------------------------------------------------------------------------------------------|------------------------|-------------------------------------------------------------------------------------------------------------------------------------------------------------------------------------------------------------------------------------------------------------------------------------------------------------------------------------------------------------------------------------------------------------------------------------------------------------------------------------------------------------------------------------------------------------------------------------------------------------------------------------------------------------------------------------------------------------------------------------------------------------------------------------------------------------------------------------------------------------------------------------------------------------------------------------------------------------------------------------------------------------------------------------------------------------------------------------------------------------------------------------------------------------------------------------------------------------------------------------------------------------------------------------|
| <b>Isoquinoline alkaloid biosynthesis</b> | map00950 | 6 | ec:1.4.3.2 oxidase,<br>ec:2.6.1.57 transaminase,<br>ec:2.6.1.5 transaminase,<br>ec:2.6.1.1 transaminase,<br>ec:1.14.16.2 3monooxygenase, ec:1.4.3.21 oxidase                                                                        | 1, 2,<br>2, 3,<br>1, 1 | SampleTS1_Locus_1041_Transcript_1/5_Confidence_0.400_Length_2190,<br>Sample1_Locus_26802_Transcript_1/2_Confidence_0.667_Length_439,<br>Sample6_Locus_13664_Transcript_1/2_Confidence_0.333_Length_862,<br>Sample1_Locus_26802_Transcript_1/2_Confidence_0.667_Length_439,<br>Sample6_Locus_13664_Transcript_1/2_Confidence_0.333_Length_862,<br>Sample1_Locus_26802_Transcript_1/2_Confidence_0.667_Length_439,<br>Sample6_Locus_13664_Transcript_1/2_Confidence_0.333_Length_862,<br>SampleTS2_Locus_6646_Transcript_2/2_Confidence_0.333_Length_1520,<br>Sample3_Locus_2321_Transcript_7/9_Confidence_0.414_Length_1007,<br>Sample1_Locus_4359_Transcript_11/14_Confidence_0.314_Length_2540                                                                                                                                                                                                                                                                                                                                                                                                                                                                                                                                                                                     |
| <b>NGlycan biosynthesis</b>               | map00510 | 5 | ec:2.4.1.101 2betaNacetylglucosaminyltransferase,<br>ec:2.4.1.131 alpha1,2mannosyltransferase,<br>ec:2.4.1.260 alpha1,6mannosyltransferase,<br>ec:2.4.1.141 Nacetylglucosaminyltransferase, ec:2.4.99.1 alpha(2,6)sialyltransferase | 1, 1,<br>1, 1,<br>14   | Sample3_Locus_2392_Transcript_15/22_Confidence_0.229_Length_3092,<br>SampleTS2_Locus_15690_Transcript_1/2_Confidence_0.333_Length_636,<br>Sample3_Locus_21096_Transcript_1/4_Confidence_0.400_Length_1431,<br>Sample3_Locus_19481_Transcript_3/6_Confidence_0.500_Length_863,<br>Sample6_Locus_19814_Transcript_10/10_Confidence_0.483_Length_1044,<br>Sample3_Locus_19889_Transcript_1/1_Confidence_0.000_Length_1128,<br>SampleTS2_Locus_4156_Transcript_29/43_Confidence_0.097_Length_1215,<br>SampleTS2_Locus_5330_Transcript_4/5_Confidence_0.429_Length_1628,<br>SampleTS1_Locus_13929_Transcript_3/7_Confidence_0.091_Length_1486,<br>Sample6_Locus_5906_Transcript_9/11_Confidence_0.333_Length_2015,<br>Sample6_Locus_6485_Transcript_12/18_Confidence_0.490_Length_1417,<br>Sample1_Locus_19212_Transcript_2/4_Confidence_0.333_Length_2192,<br>Sample3_Locus_191_Transcript_86/118_Confidence_0.018_Length_2298,<br>Sample3_Locus_12595_Transcript_4/8_Confidence_0.364_Length_2480,<br>SampleTS1_Locus_993_Transcript_3/9_Confidence_0.083_Length_1910,<br>Sample3_Locus_25591_Transcript_4/4_Confidence_0.000_Length_1038,<br>SampleTS2_Locus_11455_Transcript_4/10_Confidence_0.630_Length_1058,<br>SampleTS1_Locus_21367_Transcript_2/3_Confidence_0.429_Length_1441 |

|                                                     |          |   |                                                                                                                                                                    |               |                                                                                                                                                                                                                                                                                                                                                                                                                                                                                                                                                                                                                                                                                                                                                                                                                                                                                                                                                                                                                                                    |
|-----------------------------------------------------|----------|---|--------------------------------------------------------------------------------------------------------------------------------------------------------------------|---------------|----------------------------------------------------------------------------------------------------------------------------------------------------------------------------------------------------------------------------------------------------------------------------------------------------------------------------------------------------------------------------------------------------------------------------------------------------------------------------------------------------------------------------------------------------------------------------------------------------------------------------------------------------------------------------------------------------------------------------------------------------------------------------------------------------------------------------------------------------------------------------------------------------------------------------------------------------------------------------------------------------------------------------------------------------|
| <b>Metabolism of xenobiotics by cytochrome P450</b> | map00980 | 5 | ec:1.1.1.184 reductase (NADPH), ec:2.5.1.18 transferase, ec:1.1.1.1 dehydrogenase, ec:1.2.1.5 dehydrogenase [NAD(P)+], ec:2.4.1.17 1naphthol glucuronyltransferase | 1, 6, 5, 1, 3 | Sample6_Locus_15547_Transcript_5/8_Confidence_0.545_Length_1332, SampleTS1_Locus_6640_Transcript_2/7_Confidence_0.357_Length_1361, Sample6_Locus_795_Transcript_19/29_Confidence_0.175_Length_1113, Unigene1242_Br_gene19, SampleTS2_Locus_4937_Transcript_4/7_Confidence_0.444_Length_827, Sample3_Locus_2715_Transcript_4/6_Confidence_0.286_Length_835, SampleTS1_Locus_23227_Transcript_3/3_Confidence_0.000_Length_1280 , SampleTS2_Locus_4874_Transcript_6/12_Confidence_0.158_Length_1042 , Sample6_Locus_1524_Transcript_26/30_Confidence_0.185_Length_3215, SampleTS2_Locus_263_Transcript_1/3_Confidence_0.250_Length_2184, SampleTS3_Locus_400_Transcript_6/29_Confidence_0.422_Length_2479, SampleTS3_Locus_23264_Transcript_1/3_Confidence_0.500_Length_845, SampleTS1_Locus_5373_Transcript_26/33_Confidence_0.065_Length_1620, Sample6_Locus_9455_Transcript_3/4_Confidence_0.200_Length_1370, SampleTS1_Locus_4303_Transcript_9/11_Confidence_0.167_Length_1464 , Sample6_Locus_8395_Transcript_14/17_Confidence_0.508_Length_1568 |
| <b>Selenocompound metabolism</b>                    | map00450 | 5 | ec:2.7.7.4 adenylyltransferase, ec:1.8.1.9 reductase, ec:2.1.1.13 synthase, ec:4.4.1.1 gammalyase, ec:6.1.1.10 ligase                                              | 3, 5, 1, 2, 1 | SampleTS3_Locus_4546_Transcript_3/8_Confidence_0.429_Length_1895, SampleTS3_Locus_3403_Transcript_3/4_Confidence_0.333_Length_1292, SampleTS1_Locus_25259_Transcript_1/2_Confidence_0.333_Length_1099 , SampleTS2_Locus_3616_Transcript_1/2_Confidence_0.333_Length_1862, Sample1_Locus_18476_Transcript_2/2_Confidence_0.000_Length_1075, Sample1_Locus_3593_Transcript_1/6_Confidence_0.250_Length_1874, Sample6_Locus_711_Transcript_5/8_Confidence_0.500_Length_1354, SampleTS1_Locus_5852_Transcript_11/12_Confidence_0.615_Length_1704, SampleTS1_Locus_8020_Transcript_2/4_Confidence_0.333_Length_2411, Sample6_Locus_5355_Transcript_5/8_Confidence_0.577_Length_1830, SampleTS2_Locus_2923_Transcript_3/4_Confidence_0.333_Length_1277, SampleTS1_Locus_1827_Transcript_15/16_Confidence_0.043_Length_2672                                                                                                                                                                                                                               |

|                                       |          |   |                                                                                                                                            |               |                                                                                                                                                                                                                                                                                                                                                                                                                                                                                                                                                                                                                                                                                                                                                                                                                                                                                                                                                             |
|---------------------------------------|----------|---|--------------------------------------------------------------------------------------------------------------------------------------------|---------------|-------------------------------------------------------------------------------------------------------------------------------------------------------------------------------------------------------------------------------------------------------------------------------------------------------------------------------------------------------------------------------------------------------------------------------------------------------------------------------------------------------------------------------------------------------------------------------------------------------------------------------------------------------------------------------------------------------------------------------------------------------------------------------------------------------------------------------------------------------------------------------------------------------------------------------------------------------------|
| <b>alphaLinolenic acid metabolism</b> | map00592 | 5 | ec:2.3.1.16 Cacyltransferase, ec:3.1.1.4 A2, ec:1.1.1.1 dehydrogenase, ec:4.2.1.17 hydratase, ec:1.3.3.6 oxidase                           | 1, 4, 5, 2, 2 | SampleTS2_Locus_1750_Transcript_17/20_Confidence_0.182_Length_1568, SampleTS1_Locus_587_Transcript_4/24_Confidence_0.067_Length_950, SampleTS2_Locus_23527_Transcript_1/1_Confidence_0.000_Length_1031, SampleTS1_Locus_11100_Transcript_2/5_Confidence_0.286_Length_1260, SampleTS3_Locus_8220_Transcript_1/4_Confidence_0.667_Length_1081, SampleTS2_Locus_4874_Transcript_6/12_Confidence_0.158_Length_1042, Sample6_Locus_1524_Transcript_26/30_Confidence_0.185_Length_3215, SampleTS2_Locus_263_Transcript_1/3_Confidence_0.250_Length_2184, SampleTS3_Locus_400_Transcript_6/29_Confidence_0.422_Length_2479, SampleTS3_Locus_23264_Transcript_1/3_Confidence_0.500_Length_845, SampleTS1_Locus_789_Transcript_9/11_Confidence_0.238_Length_2300, Sample3_Locus_5282_Transcript_2/7_Confidence_0.700_Length_1266, SampleTS2_Locus_1750_Transcript_17/20_Confidence_0.182_Length_1568, Sample3_Locus_6833_Transcript_1/1_Confidence_0.000_Length_1688 |
| <b>Sphingolipid metabolism</b>        | map00600 | 5 | ec:2.3.1.24 Nacyltransferase, ec:3.1.3.4 phosphatase, ec:2.8.2.11 sulfotransferase, ec:3.2.1.22 melibiase, ec:3.2.1.23 lactase (ambiguous) | 2, 2, 1, 1, 1 | SampleTS1_Locus_703_Transcript_3/4_Confidence_0.333_Length_1395, Sample3_Locus_4289_Transcript_3/4_Confidence_0.333_Length_3187, Sample1_Locus_2193_Transcript_40/42_Confidence_0.262_Length_1445, SampleTS2_Locus_23786_Transcript_1/1_Confidence_0.000_Length_866, Sample1_Locus_565_Transcript_2/8_Confidence_0.636_Length_882, SampleTS2_Locus_3316_Transcript_5/7_Confidence_0.211_Length_3110, SampleTS2_Locus_9286_Transcript_1/1_Confidence_0.000_Length_2119                                                                                                                                                                                                                                                                                                                                                                                                                                                                                       |

|                                        |          |   |                                                                                                                                                                   |               |                                                                                                                                                                                                                                                                                                                                                                                                                                                                                                                                                                                                                                                                                                                                                                                                                                                                                                                                                                                                                                                                                                                  |
|----------------------------------------|----------|---|-------------------------------------------------------------------------------------------------------------------------------------------------------------------|---------------|------------------------------------------------------------------------------------------------------------------------------------------------------------------------------------------------------------------------------------------------------------------------------------------------------------------------------------------------------------------------------------------------------------------------------------------------------------------------------------------------------------------------------------------------------------------------------------------------------------------------------------------------------------------------------------------------------------------------------------------------------------------------------------------------------------------------------------------------------------------------------------------------------------------------------------------------------------------------------------------------------------------------------------------------------------------------------------------------------------------|
| <b>Drug metabolism cytochrome P450</b> | map00982 | 5 | ec:2.5.1.18 transferase, ec:1.1.1.1.1 dehydrogenase, ec:1.14.13.8 monooxygenase, ec:1.2.1.5 dehydrogenase [NAD(P)+], ec:2.4.1.17 1-naphthol glucuronyltransferase | 6, 5, 2, 1, 3 | SampleTS1_Locus_6640_Transcript_2/7_Confidence_0.357_Length_1361, Sample6_Locus_795_Transcript_19/29_Confidence_0.175_Length_1113, Unigene1242_Br_gene19, SampleTS2_Locus_4937_Transcript_4/7_Confidence_0.444_Length_827, Sample3_Locus_2715_Transcript_4/6_Confidence_0.286_Length_835, SampleTS1_Locus_23227_Transcript_3/3_Confidence_0.000_Length_1280, SampleTS2_Locus_4874_Transcript_6/12_Confidence_0.158_Length_1042, Sample6_Locus_1524_Transcript_26/30_Confidence_0.185_Length_3215, SampleTS2_Locus_263_Transcript_1/3_Confidence_0.250_Length_2184, SampleTS3_Locus_400_Transcript_6/29_Confidence_0.422_Length_2479, SampleTS3_Locus_23264_Transcript_1/3_Confidence_0.500_Length_845, Sample3_Locus_10285_Transcript_1/4_Confidence_0.667_Length_836, SampleTS1_Locus_25099_Transcript_1/1_Confidence_0.000_Length_629, SampleTS1_Locus_5373_Transcript_26/33_Confidence_0.065_Length_1620, Sample6_Locus_9455_Transcript_3/4_Confidence_0.200_Length_1370, SampleTS1_Locus_4303_Transcript_9/11_Confidence_0.167_Length_1464, Sample6_Locus_8395_Transcript_14/17_Confidence_0.508_Length_1568 |
| <b>Monobactam biosynthesis</b>         | map00261 | 4 | ec:2.7.2.4 kinase, ec:2.7.7.4 adenyltransferase, ec:1.17.1.8 reductase, ec:4.3.3.7 synthase                                                                       | 1, 3, 1, 1    | Sample3_Locus_2031_Transcript_1/1_Confidence_0.000_Length_2262, SampleTS3_Locus_4546_Transcript_3/8_Confidence_0.429_Length_1895, SampleTS3_Locus_3403_Transcript_3/4_Confidence_0.333_Length_1292, SampleTS1_Locus_25259_Transcript_1/2_Confidence_0.333_Length_1099, Sample6_Locus_3108_Transcript_12/12_Confidence_0.019_Length_1297, SampleTS1_Locus_10980_Transcript_1/3_Confidence_0.667_Length_1432                                                                                                                                                                                                                                                                                                                                                                                                                                                                                                                                                                                                                                                                                                       |

|                                                       |          |   |                                                                                                                                                                |             |                                                                                                                                                                                                                                                                                                                                                                                                                                                                                                                                                                                                                                                                                                                                                                                                                                                                                                                                                                                                                           |
|-------------------------------------------------------|----------|---|----------------------------------------------------------------------------------------------------------------------------------------------------------------|-------------|---------------------------------------------------------------------------------------------------------------------------------------------------------------------------------------------------------------------------------------------------------------------------------------------------------------------------------------------------------------------------------------------------------------------------------------------------------------------------------------------------------------------------------------------------------------------------------------------------------------------------------------------------------------------------------------------------------------------------------------------------------------------------------------------------------------------------------------------------------------------------------------------------------------------------------------------------------------------------------------------------------------------------|
| <b>Glycosphingo lipid biosynthesis ganglio series</b> | map00604 | 4 | ec:2.4.99.7 6alphasialyltransferase,<br>ec:2.4.99.4 alpha2,3sialyltransferase,<br>ec:2.4.99.8 alpha2,8sialyltransferase,<br>ec:3.2.1.23 lactase<br>(ambiguous) | 1, 10, 3, 1 | Sample6_Locus_28634_Transcript_1/2_Confidence_0.333_Length_832, Sample6_Locus_1667_Transcript_21/40_Confidence_0.198_Length_1348, Sample6_Locus_6485_Transcript_12/18_Confidence_0.490_Length_1417, Sample6_Locus_22436_Transcript_2/2_Confidence_0.333_Length_1831, Sample3_Locus_191_Transcript_86/118_Confidence_0.018_Length_2298, Sample3_Locus_19889_Transcript_1/1_Confidence_0.000_Length_1128, SampleTS2_Locus_4156_Transcript_29/43_Confidence_0.097_Length_1215, SampleTS1_Locus_10921_Transcript_5/7_Confidence_0.444_Length_843, Sample6_Locus_28634_Transcript_1/2_Confidence_0.333_Length_832, SampleTS1_Locus_13929_Transcript_3/7_Confidence_0.091_Length_1486, SampleTS1_Locus_6551_Transcript_6/13_Confidence_0.111_Length_1643, Sample6_Locus_6485_Transcript_12/18_Confidence_0.490_Length_1417, Sample6_Locus_14905_Transcript_12/13_Confidence_0.077_Length_1757, Sample6_Locus_28634_Transcript_1/2_Confidence_0.333_Length_832, SampleTS2_Locus_9286_Transcript_1/1_Confidence_0.000_Length_2119 |
| <b>Styrene degradation</b>                            | map00643 | 4 | ec:3.7.1.2 betadiketonase,<br>ec:3.5.5.1 acetonitrilase,<br>ec:4.2.1.84 hydratase,<br>ec:3.5.1.4 acylamidase                                                   | 1, 1, 1, 2  | SampleTS1_Locus_6929_Transcript_8/20_Confidence_0.293_Length_1407, Sample3_Locus_27182_Transcript_2/3_Confidence_0.250_Length_1010, Sample3_Locus_12929_Transcript_1/1_Confidence_0.000_Length_1898, Sample6_Locus_14763_Transcript_11/12_Confidence_0.182_Length_1117, Sample6_Locus_19655_Transcript_1/3_Confidence_0.667_Length_978                                                                                                                                                                                                                                                                                                                                                                                                                                                                                                                                                                                                                                                                                    |
| <b>Novobiocin biosynthesis</b>                        | map00401 | 4 | ec:2.6.1.57 transaminase,<br>ec:2.6.1.5 transaminase,<br>ec:2.6.1.9 transaminase,<br>ec:2.6.1.1 transaminase                                                   | 2, 2, 2, 3  | Sample1_Locus_26802_Transcript_1/2_Confidence_0.667_Length_439, Sample6_Locus_13664_Transcript_1/2_Confidence_0.333_Length_862, Sample1_Locus_26802_Transcript_1/2_Confidence_0.667_Length_439, Sample6_Locus_13664_Transcript_1/2_Confidence_0.333_Length_862, Sample1_Locus_26802_Transcript_1/2_Confidence_0.667_Length_439, Sample6_Locus_13664_Transcript_1/2_Confidence_0.333_Length_862, Sample1_Locus_26802_Transcript_1/2_Confidence_0.667_Length_439, Sample6_Locus_13664_Transcript_1/2_Confidence_0.333_Length_862, Sample1_Locus_26802_Transcript_1/2_Confidence_0.667_Length_439, Sample6_Locus_13664_Transcript_1/2_Confidence_0.333_Length_862, SampleTS2_Locus_6646_Transcript_2/2_Confidence_0.333_Length_1520                                                                                                                                                                                                                                                                                          |

|                                                           |          |   |                                                                                                                                                                                        |            |                                                                                                                                                                                                                                                                                                                                                                                                                                                                        |
|-----------------------------------------------------------|----------|---|----------------------------------------------------------------------------------------------------------------------------------------------------------------------------------------|------------|------------------------------------------------------------------------------------------------------------------------------------------------------------------------------------------------------------------------------------------------------------------------------------------------------------------------------------------------------------------------------------------------------------------------------------------------------------------------|
| <b>Lysine biosynthesis</b>                                | map00300 | 4 | ec:2.6.1.57 transaminase, ec:2.7.2.4 kinase, ec:1.17.1.8 reductase, ec:4.3.3.7 synthase                                                                                                | 2, 1, 1, 1 | Sample1_Locus_26802_Transcript_1/2_Confidence_0.667_Length_439, Sample6_Locus_13664_Transcript_1/2_Confidence_0.333_Length_862, Sample3_Locus_2031_Transcript_1/1_Confidence_0.000_Length_2262, Sample6_Locus_3108_Transcript_12/12_Confidence_0.019_Length_1297, SampleTS1_Locus_10980_Transcript_1/3_Confidence_0.667_Length_1432                                                                                                                                    |
| <b>Ubiquinone and other terpenoidquinone biosynthesis</b> | map00130 | 4 | ec:1.13.11.27 dioxygenase, ec:2.1.1.95 Omethyltransferase, ec:2.6.1.5 transaminase, ec:2.1.1.295 methyltransferase                                                                     | 3, 1, 2, 1 | SampleTS1_Locus_605_Transcript_11/25_Confidence_0.258_Length_787, SampleTS2_Locus_361_Transcript_3/4_Confidence_0.750_Length_304, SampleTS1_Locus_605_Transcript_3/25_Confidence_0.161_Length_805, SampleTS1_Locus_8489_Transcript_1/1_Confidence_0.000_Length_1204, Sample1_Locus_26802_Transcript_1/2_Confidence_0.667_Length_439, Sample6_Locus_13664_Transcript_1/2_Confidence_0.333_Length_862, SampleTS1_Locus_23650_Transcript_3/3_Confidence_0.000_Length_1330 |
| <b>Steroid biosynthesis</b>                               | map00100 | 4 | ec:2.5.1.21 synthase, ec:3.1.1.13 esterase, ec:1.3.1.21 reductase, ec:1.14.13.70 14alpha-demethylase                                                                                   | 1, 1, 1, 1 | Sample6_Locus_901_Transcript_6/8_Confidence_0.643_Length_1628, SampleTS2_Locus_2263_Transcript_6/8_Confidence_0.429_Length_1743, Sample6_Locus_2751_Transcript_28/34_Confidence_0.070_Length_1735, SampleTS2_Locus_4266_Transcript_1/3_Confidence_0.333_Length_1522                                                                                                                                                                                                    |
| <b>Streptomycin biosynthesis</b>                          | map00521 | 4 | ec:2.7.1.2 glucokinase (phosphorylating), ec:2.7.1.1 hexokinase type IV glucokinase, ec:1.1.1.133 reductase, ec:5.1.3.13 3,5-epimerase                                                 | 1, 1, 2, 1 | Sample6_Locus_5095_Transcript_5/8_Confidence_0.300_Length_1241, Sample6_Locus_5095_Transcript_5/8_Confidence_0.300_Length_1241, Sample3_Locus_2806_Transcript_6/14_Confidence_0.167_Length_1197, SampleTS2_Locus_1881_Transcript_15/19_Confidence_0.439_Length_912, Sample3_Locus_2806_Transcript_6/14_Confidence_0.167_Length_1197                                                                                                                                    |
| <b>Various types of N-glycan biosynthesis</b>             | map00513 | 4 | ec:2.4.1.101 2beta-N-acetylglucosaminyltransferase, ec:2.4.1.131 alpha1,2-mannosyltransferase, ec:2.4.1.260 alpha1,6-mannosyltransferase, ec:2.4.1.141 N-acetylglucosaminyltransferase | 1, 1, 1, 1 | Sample3_Locus_2392_Transcript_15/22_Confidence_0.229_Length_3092, SampleTS2_Locus_15690_Transcript_1/2_Confidence_0.333_Length_636, Sample3_Locus_21096_Transcript_1/4_Confidence_0.400_Length_1431, Sample3_Locus_19481_Transcript_3/6_Confidence_0.500_Length_863                                                                                                                                                                                                    |

|                                                  |          |   |                                                                                                                                                                      |               |                                                                                                                                                                                                                                                                                                                                                                                                                                                                                                                                                                                                                                                                                                                                                                                                                                                                                                                                                  |
|--------------------------------------------------|----------|---|----------------------------------------------------------------------------------------------------------------------------------------------------------------------|---------------|--------------------------------------------------------------------------------------------------------------------------------------------------------------------------------------------------------------------------------------------------------------------------------------------------------------------------------------------------------------------------------------------------------------------------------------------------------------------------------------------------------------------------------------------------------------------------------------------------------------------------------------------------------------------------------------------------------------------------------------------------------------------------------------------------------------------------------------------------------------------------------------------------------------------------------------------------|
| <b>Retinol metabolism</b>                        | map00830 | 4 | ec:1.3.99.23<br>13,14reductase,<br>ec:1.1.1.105<br>dehydrogenase<br>(NAD+),<br>ec:1.1.1.1<br>dehydrogenase,<br>ec:2.4.1.17<br>1naphthol<br>glucuronyltrans<br>ferase | 2, 3,<br>5, 3 | SampleTS1_Locus_3615_Transcript_4/6_Confidence_0.444_Length_1164,<br>Sample6_Locus_636_Transcript_7/7_Confidence_0.000_Length_955,<br>Sample3_Locus_27117_Transcript_1/3_Confidence_0.250_Length_685,<br>Sample6_Locus_6954_Transcript_4/5_Confidence_0.500_Length_1201,<br>SampleTS1_Locus_10087_Transcript_6/7_Confidence_0.167_Length_948,<br>SampleTS2_Locus_4874_Transcript_6/12_Confidence_0.158_Length_1042<br>,<br>Sample6_Locus_1524_Transcript_26/30_Confidence_0.185_Length_3215,<br>SampleTS2_Locus_263_Transcript_1/3_Confidence_0.250_Length_2184,<br>SampleTS3_Locus_400_Transcript_6/29_Confidence_0.422_Length_2479,<br>SampleTS3_Locus_23264_Transcript_1/3_Confidence_0.500_Length_845,<br>Sample6_Locus_9455_Transcript_3/4_Confidence_0.200_Length_1370,<br>SampleTS1_Locus_4303_Transcript_9/11_Confidence_0.167_Length_1464<br>, Sample6_Locus_8395_Transcript_14/17_Confidence_0.508_Length_1568                         |
| <b>C5Branched dibasic acid metabolism</b>        | map00660 | 3 | ec:2.2.1.6<br>synthase,<br>ec:6.2.1.5<br>ligase<br>(ADPforming),<br>ec:1.1.1.85<br>dehydrogenase                                                                     | 1, 2,<br>1    | Sample3_Locus_4596_Transcript_3/6_Confidence_0.400_Length_1157,<br>Sample3_Locus_2152_Transcript_2/3_Confidence_0.333_Length_1481,<br>SampleTS3_Locus_6340_Transcript_1/1_Confidence_0.000_Length_1077,<br>SampleTS2_Locus_3967_Transcript_1/4_Confidence_0.667_Length_1445                                                                                                                                                                                                                                                                                                                                                                                                                                                                                                                                                                                                                                                                      |
| <b>Chloroalkane and chloroalkene degradation</b> | map00625 | 3 | ec:1.2.1.46<br>dehydrogenase,<br>ec:1.1.1.1<br>dehydrogenase,<br>ec:1.2.1.3<br>dehydrogenase<br>(NAD+)                                                               | 2, 5,<br>6    | SampleTS2_Locus_4874_Transcript_6/12_Confidence_0.158_Length_1042<br>,<br>SampleTS3_Locus_23264_Transcript_1/3_Confidence_0.500_Length_845,<br>SampleTS2_Locus_4874_Transcript_6/12_Confidence_0.158_Length_1042<br>,<br>Sample6_Locus_1524_Transcript_26/30_Confidence_0.185_Length_3215,<br>SampleTS2_Locus_263_Transcript_1/3_Confidence_0.250_Length_2184,<br>SampleTS3_Locus_400_Transcript_6/29_Confidence_0.422_Length_2479,<br>SampleTS3_Locus_23264_Transcript_1/3_Confidence_0.500_Length_845,<br>SampleTS3_Locus_23038_Transcript_2/3_Confidence_0.333_Length_1864<br>,<br>SampleTS2_Locus_4874_Transcript_6/12_Confidence_0.158_Length_1042<br>, Sample3_Locus_23176_Transcript_2/3_Confidence_0.333_Length_1282,<br>SampleTS1_Locus_5373_Transcript_26/33_Confidence_0.065_Length_162<br>0,<br>Sample6_Locus_12695_Transcript_1/2_Confidence_0.333_Length_2218,<br>SampleTS3_Locus_23264_Transcript_1/3_Confidence_0.500_Length_845 |

|                                                                  |          |   |                                                                                                     |          |                                                                                                                                                                                                                                                                                                                                                                                                                                                                                                                                                                                                                                                                                                                                                                                                                                                                                                                                                           |
|------------------------------------------------------------------|----------|---|-----------------------------------------------------------------------------------------------------|----------|-----------------------------------------------------------------------------------------------------------------------------------------------------------------------------------------------------------------------------------------------------------------------------------------------------------------------------------------------------------------------------------------------------------------------------------------------------------------------------------------------------------------------------------------------------------------------------------------------------------------------------------------------------------------------------------------------------------------------------------------------------------------------------------------------------------------------------------------------------------------------------------------------------------------------------------------------------------|
| <b>Geraniol degradation</b>                                      | map00281 | 3 | ec:2.3.1.16 Cacyltransferase, ec:4.2.1.17 hydratase, ec:1.1.1.35 dehydrogenase                      | 1, 2, 3  | SampleTS2_Locus_1750_Transcript_17/20_Confidence_0.182_Length_1568, SampleTS1_Locus_789_Transcript_9/11_Confidence_0.238_Length_2300, Sample3_Locus_5282_Transcript_2/7_Confidence_0.700_Length_1266, SampleTS1_Locus_789_Transcript_9/11_Confidence_0.238_Length_2300, SampleTS3_Locus_1827_Transcript_3/3_Confidence_0.000_Length_1033, SampleTS3_Locus_11808_Transcript_9/11_Confidence_0.565_Length_1006                                                                                                                                                                                                                                                                                                                                                                                                                                                                                                                                              |
| <b>Glycosphingo lipid biosynthesis globo and isoglobo series</b> | map00603 | 3 | ec:2.4.99.4 alpha2,3sialyltransferase, ec:2.4.99.8 alpha2,8sialyltransferase, ec:3.2.1.22 melibiase | 10, 3, 1 | Sample6_Locus_1667_Transcript_21/40_Confidence_0.198_Length_1348, Sample6_Locus_6485_Transcript_12/18_Confidence_0.490_Length_1417, Sample6_Locus_22436_Transcript_2/2_Confidence_0.333_Length_1831, Sample3_Locus_191_Transcript_86/118_Confidence_0.018_Length_2298, Sample3_Locus_19889_Transcript_1/1_Confidence_0.000_Length_1128, SampleTS2_Locus_4156_Transcript_29/43_Confidence_0.097_Length_1215, SampleTS1_Locus_10921_Transcript_5/7_Confidence_0.444_Length_843, Sample6_Locus_28634_Transcript_1/2_Confidence_0.333_Length_832, SampleTS1_Locus_13929_Transcript_3/7_Confidence_0.091_Length_1486, SampleTS1_Locus_6551_Transcript_6/13_Confidence_0.111_Length_1643, Sample6_Locus_6485_Transcript_12/18_Confidence_0.490_Length_1417, Sample6_Locus_14905_Transcript_12/13_Confidence_0.077_Length_1757, Sample6_Locus_28634_Transcript_1/2_Confidence_0.333_Length_832, SampleTS2_Locus_3316_Transcript_5/7_Confidence_0.211_Length_3110 |



|                                              |          |   |                                                                                                 |             |                                                                                                                                                                                                                                                                                                                                                                                                                                                                                                                                                                                                                                                                                                                                                                                                                                                                                                                                                                                                                                                                                                                                                                                                                                                                                                                                                                                                                                                                                                                                                                                                                                               |
|----------------------------------------------|----------|---|-------------------------------------------------------------------------------------------------|-------------|-----------------------------------------------------------------------------------------------------------------------------------------------------------------------------------------------------------------------------------------------------------------------------------------------------------------------------------------------------------------------------------------------------------------------------------------------------------------------------------------------------------------------------------------------------------------------------------------------------------------------------------------------------------------------------------------------------------------------------------------------------------------------------------------------------------------------------------------------------------------------------------------------------------------------------------------------------------------------------------------------------------------------------------------------------------------------------------------------------------------------------------------------------------------------------------------------------------------------------------------------------------------------------------------------------------------------------------------------------------------------------------------------------------------------------------------------------------------------------------------------------------------------------------------------------------------------------------------------------------------------------------------------|
| <b>Phenylpropa<br/>noid<br/>biosynthesis</b> | map00940 | 3 | ec:1.2.1.68<br>dehydrogenase,<br>ec:1.11.1.7<br>lactoperoxidase<br>, ec:3.2.1.21<br>gentiobiase | 1,<br>20, 2 | SampleTS1_Locus_5373_Transcript_26/33_Confidence_0.065_Length_162<br>0,<br>SampleTS1_Locus_6669_Transcript_3/3_Confidence_0.200_Length_979,<br>SampleTS2_Locus_760_Transcript_7/10_Confidence_0.186_Length_1031,<br>Sample6_Locus_795_Transcript_19/29_Confidence_0.175_Length_1113,<br>SampleTS2_Locus_4937_Transcript_4/7_Confidence_0.444_Length_827,<br>Sample3_Locus_13267_Transcript_2/3_Confidence_0.667_Length_841,<br>Sample1_Locus_18818_Transcript_1/1_Confidence_0.000_Length_983,<br>SampleTS1_Locus_6640_Transcript_2/7_Confidence_0.357_Length_1361,<br>Sample3_Locus_2283_Transcript_4/7_Confidence_0.091_Length_449,<br>SampleTS2_Locus_7247_Transcript_5/9_Confidence_0.318_Length_1257,<br>SampleTS2_Locus_11692_Transcript_2/7_Confidence_0.333_Length_2130<br>, SampleTS3_Locus_2808_Transcript_2/4_Confidence_0.333_Length_770,<br>Sample3_Locus_11502_Transcript_4/7_Confidence_0.636_Length_850,<br>SampleTS2_Locus_20766_Transcript_5/7_Confidence_0.250_Length_1030<br>,<br>SampleTS1_Locus_1282_Transcript_9/25_Confidence_0.318_Length_1204<br>,<br>SampleTS3_Locus_10310_Transcript_1/2_Confidence_0.667_Length_957,<br>SampleTS2_Locus_21396_Transcript_1/2_Confidence_0.667_Length_780,<br>Sample3_Locus_2715_Transcript_4/6_Confidence_0.286_Length_835,<br>SampleTS1_Locus_4034_Transcript_24/26_Confidence_0.200_Length_835<br>, Sample6_Locus_13592_Transcript_5/5_Confidence_0.250_Length_879,<br>Sample6_Locus_1113_Transcript_3/14_Confidence_0.211_Length_520,<br>Sample1_Locus_25240_Transcript_4/4_Confidence_0.429_Length_2225,<br>SampleTS2_Locus_9286_Transcript_1/1_Confidence_0.000_Length_2119 |
|----------------------------------------------|----------|---|-------------------------------------------------------------------------------------------------|-------------|-----------------------------------------------------------------------------------------------------------------------------------------------------------------------------------------------------------------------------------------------------------------------------------------------------------------------------------------------------------------------------------------------------------------------------------------------------------------------------------------------------------------------------------------------------------------------------------------------------------------------------------------------------------------------------------------------------------------------------------------------------------------------------------------------------------------------------------------------------------------------------------------------------------------------------------------------------------------------------------------------------------------------------------------------------------------------------------------------------------------------------------------------------------------------------------------------------------------------------------------------------------------------------------------------------------------------------------------------------------------------------------------------------------------------------------------------------------------------------------------------------------------------------------------------------------------------------------------------------------------------------------------------|

|                                    |          |   |                                                                                    |          |                                                                                                                                                                                                                                                                                                                                                                                                                                                                                                                                                                                                                                                                                                                                                                                                                                                                                                                                                                                                                        |
|------------------------------------|----------|---|------------------------------------------------------------------------------------|----------|------------------------------------------------------------------------------------------------------------------------------------------------------------------------------------------------------------------------------------------------------------------------------------------------------------------------------------------------------------------------------------------------------------------------------------------------------------------------------------------------------------------------------------------------------------------------------------------------------------------------------------------------------------------------------------------------------------------------------------------------------------------------------------------------------------------------------------------------------------------------------------------------------------------------------------------------------------------------------------------------------------------------|
| <b>Caprolactam degradation</b>     | map00930 | 3 | ec:1.1.1.2 dehydrogenase (NADP+), ec:4.2.1.17 hydratase, ec:1.1.1.35 dehydrogenase | 10, 2, 3 | Sample6_Locus_15547_Transcript_5/8_Confidence_0.545_Length_1332, Sample6_Locus_7369_Transcript_3/6_Confidence_0.200_Length_1828, SampleTS1_Locus_2734_Transcript_1/3_Confidence_0.333_Length_2491, SampleTS2_Locus_15764_Transcript_1/1_Confidence_0.000_Length_1068, Sample3_Locus_27117_Transcript_1/3_Confidence_0.250_Length_685, Sample6_Locus_6954_Transcript_4/5_Confidence_0.500_Length_1201, Sample6_Locus_4129_Transcript_8/27_Confidence_0.107_Length_571, SampleTS3_Locus_8149_Transcript_4/10_Confidence_0.118_Length_927, SampleTS1_Locus_6731_Transcript_14/15_Confidence_0.246_Length_2303, SampleTS1_Locus_10087_Transcript_6/7_Confidence_0.167_Length_948, SampleTS1_Locus_789_Transcript_9/11_Confidence_0.238_Length_2300, Sample3_Locus_5282_Transcript_2/7_Confidence_0.700_Length_1266, SampleTS1_Locus_789_Transcript_9/11_Confidence_0.238_Length_2300, SampleTS3_Locus_1827_Transcript_3/3_Confidence_0.000_Length_1033, SampleTS3_Locus_11808_Transcript_9/11_Confidence_0.565_Length_1006 |
| <b>Arachidonic acid metabolism</b> | map00590 | 3 | ec:1.1.1.184 reductase (NADPH), ec:1.1.1.1.9 peroxidase, ec:3.1.1.4 A2             | 1, 6, 4  | Sample6_Locus_15547_Transcript_5/8_Confidence_0.545_Length_1332, SampleTS1_Locus_6640_Transcript_2/7_Confidence_0.357_Length_1361, SampleTS3_Locus_2808_Transcript_2/4_Confidence_0.333_Length_770, Sample6_Locus_795_Transcript_19/29_Confidence_0.175_Length_1113, Sample3_Locus_2715_Transcript_4/6_Confidence_0.286_Length_835, Sample1_Locus_18818_Transcript_1/1_Confidence_0.000_Length_983, Sample6_Locus_1113_Transcript_3/14_Confidence_0.211_Length_520, SampleTS1_Locus_587_Transcript_4/24_Confidence_0.067_Length_950, SampleTS2_Locus_23527_Transcript_1/1_Confidence_0.000_Length_1031, SampleTS1_Locus_11100_Transcript_2/5_Confidence_0.286_Length_1260, SampleTS3_Locus_8220_Transcript_1/4_Confidence_0.667_Length_1081                                                                                                                                                                                                                                                                            |

|                               |          |   |                                                                             |         |                                                                                                                                                                                                                                                                                                                                                                                                                                                                                                                                  |
|-------------------------------|----------|---|-----------------------------------------------------------------------------|---------|----------------------------------------------------------------------------------------------------------------------------------------------------------------------------------------------------------------------------------------------------------------------------------------------------------------------------------------------------------------------------------------------------------------------------------------------------------------------------------------------------------------------------------|
| <b>Ether lipid metabolism</b> | map00565 | 3 | ec:3.1.1.4 A2, ec:3.1.3.4 phosphatase, ec:2.8.2.11 sulfotransferase         | 4, 2, 1 | SampleTS1_Locus_587_Transcript_4/24_Confidence_0.067_Length_950, SampleTS2_Locus_23527_Transcript_1/1_Confidence_0.000_Length_1031 , SampleTS1_Locus_11100_Transcript_2/5_Confidence_0.286_Length_1260 , SampleTS3_Locus_8220_Transcript_1/4_Confidence_0.667_Length_1081, Sample1_Locus_2193_Transcript_40/42_Confidence_0.262_Length_1445, SampleTS2_Locus_23786_Transcript_1/1_Confidence_0.000_Length_866, Sample1_Locus_565_Transcript_2/8_Confidence_0.636_Length_882                                                      |
| <b>Riboflavin metabolism</b>  | map00740 | 3 | ec:3.6.1.9 diphosphatase, ec:3.6.1.18 diphosphatase, ec:3.1.3.2 phosphatase | 5, 1, 2 | Sample6_Locus_1849_Transcript_4/6_Confidence_0.429_Length_866, Sample3_Locus_345_Transcript_6/8_Confidence_0.455_Length_1801, SampleTS3_Locus_5573_Transcript_4/5_Confidence_0.333_Length_940, Sample3_Locus_10699_Transcript_3/4_Confidence_0.400_Length_957, Sample3_Locus_27182_Transcript_2/3_Confidence_0.250_Length_1010, Sample3_Locus_10699_Transcript_3/4_Confidence_0.400_Length_957, Sample3_Locus_3056_Transcript_6/6_Confidence_0.000_Length_1859, SampleTS1_Locus_10554_Transcript_2/2_Confidence_0.000_Length_719 |

|                            |          |   |                                                                          |           |                                                                                                                                                                                                                                                                                                                                                                                                                                                                                                                                                                                                                                                                                                                                                                                                                                                                                                                                                                                                                                                                                                                                                                                                                                                                                                                                                                                                                                                                                                                                                                                                                                                                                                                                                                                                                                                                                                                                                                                                                                                                                                                                                                                                                                                                                                                                                                                                                                                                                                                                                                                                                                                                                                                                                                                                                                                                                                                                                                                                                                                                                                                                                                                                                                                                                                                                                                                                                                                                                                                                                                                                                                                                                                                                                                                                                                                                                                                                                                                                                                                                                                                                                                                                                                                                                                                                                                                                                                                                                                                                                                                                                                                          |
|----------------------------|----------|---|--------------------------------------------------------------------------|-----------|----------------------------------------------------------------------------------------------------------------------------------------------------------------------------------------------------------------------------------------------------------------------------------------------------------------------------------------------------------------------------------------------------------------------------------------------------------------------------------------------------------------------------------------------------------------------------------------------------------------------------------------------------------------------------------------------------------------------------------------------------------------------------------------------------------------------------------------------------------------------------------------------------------------------------------------------------------------------------------------------------------------------------------------------------------------------------------------------------------------------------------------------------------------------------------------------------------------------------------------------------------------------------------------------------------------------------------------------------------------------------------------------------------------------------------------------------------------------------------------------------------------------------------------------------------------------------------------------------------------------------------------------------------------------------------------------------------------------------------------------------------------------------------------------------------------------------------------------------------------------------------------------------------------------------------------------------------------------------------------------------------------------------------------------------------------------------------------------------------------------------------------------------------------------------------------------------------------------------------------------------------------------------------------------------------------------------------------------------------------------------------------------------------------------------------------------------------------------------------------------------------------------------------------------------------------------------------------------------------------------------------------------------------------------------------------------------------------------------------------------------------------------------------------------------------------------------------------------------------------------------------------------------------------------------------------------------------------------------------------------------------------------------------------------------------------------------------------------------------------------------------------------------------------------------------------------------------------------------------------------------------------------------------------------------------------------------------------------------------------------------------------------------------------------------------------------------------------------------------------------------------------------------------------------------------------------------------------------------------------------------------------------------------------------------------------------------------------------------------------------------------------------------------------------------------------------------------------------------------------------------------------------------------------------------------------------------------------------------------------------------------------------------------------------------------------------------------------------------------------------------------------------------------------------------------------------------------------------------------------------------------------------------------------------------------------------------------------------------------------------------------------------------------------------------------------------------------------------------------------------------------------------------------------------------------------------------------------------------------------------------------------------------------|
| <b>Thiamine metabolism</b> | map00730 | 3 | ec:2.7.4.3 kinase,<br>ec:2.8.1.7 desulfurase,<br>ec:3.6.1.15 phosphatase | 7, 2, 278 | Sample3_Locus_10333_Transcript_2/3_Confidence_0.750_Length_926,<br>Sample3_Locus_3294_Transcript_4/6_Confidence_0.429_Length_2049,<br>SampleTS1_Locus_6152_Transcript_2/7_Confidence_0.375_Length_1167,<br>Sample3_Locus_9766_Transcript_1/1_Confidence_0.000_Length_1440,<br>Sample3_Locus_6601_Transcript_5/5_Confidence_0.200_Length_4716,<br>SampleTS1_Locus_1762_Transcript_13/36_Confidence_0.058_Length_819<br>, Sample1_Locus_24078_Transcript_6/7_Confidence_0.150_Length_1572,<br>Sample1_Locus_3213_Transcript_2/3_Confidence_0.667_Length_1138,<br>SampleTS3_Locus_8776_Transcript_8/10_Confidence_0.567_Length_524,<br>SampleTS3_Locus_13653_Transcript_1/3_Confidence_0.667_Length_1397<br>, Sample6_Locus_2550_Transcript_5/11_Confidence_0.238_Length_1406,<br>SampleTS2_Locus_8844_Transcript_2/4_Confidence_0.200_Length_1216,<br>Sample6_Locus_4222_Transcript_1/1_Confidence_0.000_Length_1621,<br>SampleTS1_Locus_1444_Transcript_2/3_Confidence_0.125_Length_1079,<br>Sample6_Locus_21118_Transcript_1/3_Confidence_0.667_Length_480,<br>Sample3_Locus_4496_Transcript_5/7_Confidence_0.200_Length_1045,<br>SampleTS1_Locus_3295_Transcript_4/7_Confidence_0.500_Length_1706,<br>SampleTS1_Locus_7342_Transcript_9/11_Confidence_0.250_Length_2056<br>, Sample6_Locus_4781_Transcript_1/2_Confidence_0.333_Length_1290,<br>Sample6_Locus_4460_Transcript_7/9_Confidence_0.417_Length_984,<br>Sample1_Locus_25395_Transcript_1/4_Confidence_0.167_Length_1170,<br>Sample6_Locus_4959_Transcript_8/8_Confidence_0.021_Length_1488,<br>Sample6_Locus_381_Transcript_17/31_Confidence_0.109_Length_686,<br>SampleTS1_Locus_3903_Transcript_4/10_Confidence_0.286_Length_1812<br>, Sample6_Locus_9657_Transcript_7/9_Confidence_0.120_Length_2317,<br>SampleTS2_Locus_2038_Transcript_10/15_Confidence_0.125_Length_523<br>,<br>SampleTS1_Locus_8634_Transcript_2/3_Confidence_0.333_Length_1251,<br>Sample6_Locus_10491_Transcript_7/7_Confidence_0.125_Length_4037,<br>SampleTS1_Locus_1405_Transcript_15/33_Confidence_0.062_Length_121<br>3,<br>SampleTS1_Locus_3177_Transcript_5/5_Confidence_0.000_Length_2422,<br>Sample6_Locus_18055_Transcript_5/5_Confidence_0.111_Length_1330,<br>Sample6_Locus_832_Transcript_2/3_Confidence_0.667_Length_879,<br>SampleTS3_Locus_8946_Transcript_7/8_Confidence_0.091_Length_2134,<br>Sample6_Locus_164_Transcript_81/296_Confidence_0.015_Length_2930,<br>SampleTS3_Locus_3584_Transcript_11/17_Confidence_0.115_Length_378<br>2,<br>Sample6_Locus_25982_Transcript_2/4_Confidence_0.667_Length_1624,<br>SampleTS3_Locus_12142_Transcript_3/6_Confidence_0.250_Length_2865<br>,<br>SampleTS2_Locus_1159_Transcript_15/16_Confidence_0.308_Length_665<br>,<br>SampleTS3_Locus_1866_Transcript_14/24_Confidence_0.200_Length_656<br>,<br>SampleTS2_Locus_5494_Transcript_10/17_Confidence_0.417_Length_323<br>0,<br>SampleTS1_Locus_5190_Transcript_5/7_Confidence_0.286_Length_4645,<br>Sample3_Locus_6601_Transcript_5/5_Confidence_0.200_Length_4716,<br>Sample6_Locus_13814_Transcript_7/9_Confidence_0.217_Length_1987,<br>Sample6_Locus_19560_Transcript_2/3_Confidence_0.333_Length_2582,<br>SampleTS3_Locus_19217_Transcript_2/5_Confidence_0.600_Length_2702<br>, Sample6_Locus_18534_Transcript_3/3_Confidence_0.000_Length_1555,<br>Sample6_Locus_4908_Transcript_6/6_Confidence_0.000_Length_1794,<br>Sample6_Locus_10088_Transcript_1/2_Confidence_0.667_Length_1090,<br>SampleTS2_Locus_2452_Transcript_2/8_Confidence_0.364_Length_455,<br>Sample6_Locus_19645_Transcript_2/4_Confidence_0.333_Length_1748,<br>SampleTS2_Locus_21455_Transcript_2/3_Confidence_0.000_Length_1624<br>,<br>Sample3_Locus_1244_Transcript_63/90_Confidence_0.004_Length_1149,<br>Sample6_Locus_33304_Transcript_3/4_Confidence_0.200_Length_839,<br>Sample3_Locus_13999_Transcript_2/3_Confidence_0.333_Length_1333,<br>Sample6_Locus_4130_Transcript_2/6_Confidence_0.375_Length_1684,<br>SampleTS1_Locus_24562_Transcript_5/6_Confidence_0.400_Length_1717<br>, Sample6_Locus_11465_Transcript_4/6_Confidence_0.333_Length_1334,<br>Sample6_Locus_7465_Transcript_1/1_Confidence_0.000_Length_1622,<br>SampleTS2_Locus_4758_Transcript_3/5_Confidence_0.500_Length_584,<br>Sample1_Locus_18570_Transcript_2/2_Confidence_0.000_Length_1230,<br>Sample3_Locus_14815_Transcript_9/11_Confidence_0.071_Length_984,<br>Sample3_Locus_31540_Transcript_1/1_Confidence_0.926_Length_1324,<br>Sample6_Locus_15929_Transcript_2/4_Confidence_0.429_Length_719,<br>Sample6_Locus_5873_Transcript_1/5_Confidence_0.333_Length_908,<br>SampleTS1_Locus_28650_Transcript_1/4_Confidence_0.250_Length_1505 |
|----------------------------|----------|---|--------------------------------------------------------------------------|-----------|----------------------------------------------------------------------------------------------------------------------------------------------------------------------------------------------------------------------------------------------------------------------------------------------------------------------------------------------------------------------------------------------------------------------------------------------------------------------------------------------------------------------------------------------------------------------------------------------------------------------------------------------------------------------------------------------------------------------------------------------------------------------------------------------------------------------------------------------------------------------------------------------------------------------------------------------------------------------------------------------------------------------------------------------------------------------------------------------------------------------------------------------------------------------------------------------------------------------------------------------------------------------------------------------------------------------------------------------------------------------------------------------------------------------------------------------------------------------------------------------------------------------------------------------------------------------------------------------------------------------------------------------------------------------------------------------------------------------------------------------------------------------------------------------------------------------------------------------------------------------------------------------------------------------------------------------------------------------------------------------------------------------------------------------------------------------------------------------------------------------------------------------------------------------------------------------------------------------------------------------------------------------------------------------------------------------------------------------------------------------------------------------------------------------------------------------------------------------------------------------------------------------------------------------------------------------------------------------------------------------------------------------------------------------------------------------------------------------------------------------------------------------------------------------------------------------------------------------------------------------------------------------------------------------------------------------------------------------------------------------------------------------------------------------------------------------------------------------------------------------------------------------------------------------------------------------------------------------------------------------------------------------------------------------------------------------------------------------------------------------------------------------------------------------------------------------------------------------------------------------------------------------------------------------------------------------------------------------------------------------------------------------------------------------------------------------------------------------------------------------------------------------------------------------------------------------------------------------------------------------------------------------------------------------------------------------------------------------------------------------------------------------------------------------------------------------------------------------------------------------------------------------------------------------------------------------------------------------------------------------------------------------------------------------------------------------------------------------------------------------------------------------------------------------------------------------------------------------------------------------------------------------------------------------------------------------------------------------------------------------------------------------------------|

|  |  |  |  |                                                                                                                                                                                                                                                                                                                                                                                                                                                                                                                                                                                                                                                                                                                                                                                                                                                                                                                                                                                                                                                                                                                                                                                                                                                                                                                                                                                                                                                                                                                                                                                                                                                                                                                                                                                                                                                                                                                                                                                                                                                                                                                                                                                                                                                                                                                                                                                                                                                                                                                                                                                                                                                                                                                                                                                                                                                                                                                                                                                                                                                                                                                                                                                                                                                                                                                                                                                                                                                                                                                                                                                                                                                                                                                                                                                                                                                                                                                                                                                                                                                                                                                                                                                                                                                                                                                                                                                                                                                                                                                                                                                                                                                                                                                                                                                                                                                                                                                                                  |
|--|--|--|--|--------------------------------------------------------------------------------------------------------------------------------------------------------------------------------------------------------------------------------------------------------------------------------------------------------------------------------------------------------------------------------------------------------------------------------------------------------------------------------------------------------------------------------------------------------------------------------------------------------------------------------------------------------------------------------------------------------------------------------------------------------------------------------------------------------------------------------------------------------------------------------------------------------------------------------------------------------------------------------------------------------------------------------------------------------------------------------------------------------------------------------------------------------------------------------------------------------------------------------------------------------------------------------------------------------------------------------------------------------------------------------------------------------------------------------------------------------------------------------------------------------------------------------------------------------------------------------------------------------------------------------------------------------------------------------------------------------------------------------------------------------------------------------------------------------------------------------------------------------------------------------------------------------------------------------------------------------------------------------------------------------------------------------------------------------------------------------------------------------------------------------------------------------------------------------------------------------------------------------------------------------------------------------------------------------------------------------------------------------------------------------------------------------------------------------------------------------------------------------------------------------------------------------------------------------------------------------------------------------------------------------------------------------------------------------------------------------------------------------------------------------------------------------------------------------------------------------------------------------------------------------------------------------------------------------------------------------------------------------------------------------------------------------------------------------------------------------------------------------------------------------------------------------------------------------------------------------------------------------------------------------------------------------------------------------------------------------------------------------------------------------------------------------------------------------------------------------------------------------------------------------------------------------------------------------------------------------------------------------------------------------------------------------------------------------------------------------------------------------------------------------------------------------------------------------------------------------------------------------------------------------------------------------------------------------------------------------------------------------------------------------------------------------------------------------------------------------------------------------------------------------------------------------------------------------------------------------------------------------------------------------------------------------------------------------------------------------------------------------------------------------------------------------------------------------------------------------------------------------------------------------------------------------------------------------------------------------------------------------------------------------------------------------------------------------------------------------------------------------------------------------------------------------------------------------------------------------------------------------------------------------------------------------------------------------------------------|
|  |  |  |  | <p>,<br/> SampleTS3_Locus_1540_Transcript_16/37_Confidence_0.097_Length_571<br/> , Sample1_Locus_25642_Transcript_6/7_Confidence_0.500_Length_1752,<br/> Sample3_Locus_9363_Transcript_11/12_Confidence_0.300_Length_752,<br/> SampleTS3_Locus_5309_Transcript_11/20_Confidence_0.050_Length_145<br/> 4, Sample3_Locus_3218_Transcript_7/8_Confidence_0.375_Length_2978,<br/> Sample6_Locus_25706_Transcript_1/1_Confidence_0.000_Length_2115,<br/> Sample3_Locus_10951_Transcript_3/4_Confidence_0.333_Length_1105,<br/> Sample3_Locus_11069_Transcript_2/8_Confidence_0.182_Length_1280,<br/> Sample3_Locus_5454_Transcript_1/7_Confidence_0.273_Length_1345,<br/> SampleTS1_Locus_3342_Transcript_18/19_Confidence_0.040_Length_374<br/> 9,<br/> Sample3_Locus_20016_Transcript_6/9_Confidence_0.273_Length_2073,<br/> Sample6_Locus_29189_Transcript_1/1_Confidence_0.000_Length_540,<br/> SampleTS3_Locus_23452_Transcript_2/2_Confidence_0.333_Length_474,<br/> Sample6_Locus_26588_Transcript_2/2_Confidence_0.000_Length_489,<br/> SampleTS1_Locus_3223_Transcript_3/36_Confidence_0.029_Length_1583<br/> ,</p> <p>SampleTS1_Locus_217_Transcript_13/13_Confidence_0.355_Length_910,<br/> SampleTS2_Locus_530_Transcript_232/383_Confidence_0.006_Length_13<br/> 15,<br/> SampleTS3_Locus_3667_Transcript_4/12_Confidence_0.364_Length_2296<br/> , Sample6_Locus_3232_Transcript_3/5_Confidence_0.545_Length_999,<br/> SampleTS1_Locus_8934_Transcript_5/6_Confidence_0.062_Length_3128,<br/> Sample3_Locus_15902_Transcript_7/11_Confidence_0.412_Length_3566,<br/> Sample3_Locus_23626_Transcript_1/1_Confidence_0.000_Length_981,<br/> Sample3_Locus_3989_Transcript_4/4_Confidence_0.000_Length_1366,<br/> SampleTS1_Locus_4491_Transcript_2/5_Confidence_0.571_Length_1595,<br/> SampleTS1_Locus_3079_Transcript_1/6_Confidence_0.333_Length_2652,<br/> Sample3_Locus_4942_Transcript_1/2_Confidence_0.333_Length_2760,<br/> Sample3_Locus_1247_Transcript_10/17_Confidence_0.625_Length_2553,<br/> Sample3_Locus_25985_Transcript_1/1_Confidence_0.000_Length_1430,<br/> SampleTS2_Locus_154_Transcript_3/9_Confidence_0.083_Length_762,<br/> SampleTS1_Locus_1128_Transcript_3/3_Confidence_0.000_Length_491,<br/> SampleTS3_Locus_4130_Transcript_1/5_Confidence_0.167_Length_1505,<br/> SampleTS2_Locus_20730_Transcript_3/3_Confidence_0.000_Length_1446<br/> ,</p> <p>SampleTS3_Locus_18221_Transcript_1/2_Confidence_0.333_Length_931,<br/> SampleTS1_Locus_18532_Transcript_2/4_Confidence_0.333_Length_1303<br/> , Sample6_Locus_12309_Transcript_1/1_Confidence_0.000_Length_1290,<br/> Sample6_Locus_16160_Transcript_1/2_Confidence_0.333_Length_1514,<br/> Sample3_Locus_1698_Transcript_7/9_Confidence_0.111_Length_1910,<br/> Sample6_Locus_25656_Transcript_2/3_Confidence_0.500_Length_785,<br/> Sample6_Locus_4942_Transcript_5/6_Confidence_0.500_Length_1741,<br/> SampleTS1_Locus_9060_Transcript_10/13_Confidence_0.611_Length_274<br/> 6,<br/> SampleTS1_Locus_4296_Transcript_6/8_Confidence_0.333_Length_1626,<br/> Sample6_Locus_2597_Transcript_1/1_Confidence_0.000_Length_1284,<br/> SampleTS3_Locus_213_Transcript_1/10_Confidence_0.188_Length_1035,<br/> Sample3_Locus_5066_Transcript_18/21_Confidence_0.464_Length_2997,<br/> Sample6_Locus_8035_Transcript_8/15_Confidence_0.095_Length_4770,<br/> Sample6_Locus_12469_Transcript_1/3_Confidence_0.400_Length_1564,<br/> Sample6_Locus_9946_Transcript_4/6_Confidence_0.600_Length_2469,<br/> Sample6_Locus_4638_Transcript_4/6_Confidence_0.500_Length_2485,<br/> Sample3_Locus_4140_Transcript_1/3_Confidence_0.333_Length_1526,<br/> SampleTS1_Locus_11450_Transcript_8/18_Confidence_0.222_Length_243<br/> 9, Sample6_Locus_9985_Transcript_2/5_Confidence_0.143_Length_1859,<br/> Sample3_Locus_1352_Transcript_3/6_Confidence_0.385_Length_690,<br/> Sample1_Locus_11542_Transcript_4/6_Confidence_0.200_Length_1313,<br/> Sample6_Locus_10676_Transcript_1/1_Confidence_0.000_Length_1850,<br/> Sample6_Locus_830_Transcript_5/5_Confidence_0.000_Length_1043,<br/> SampleTS1_Locus_10413_Transcript_7/8_Confidence_0.500_Length_2083<br/> , Sample3_Locus_6079_Transcript_6/7_Confidence_0.286_Length_3325,<br/> Sample3_Locus_1341_Transcript_4/6_Confidence_0.500_Length_950,<br/> Sample3_Locus_10333_Transcript_2/3_Confidence_0.750_Length_926,<br/> SampleTS3_Locus_7380_Transcript_1/1_Confidence_0.000_Length_2585,<br/> Sample6_Locus_4473_Transcript_5/6_Confidence_0.583_Length_591,<br/> SampleTS3_Locus_8920_Transcript_1/2_Confidence_0.333_Length_1841,<br/> Sample6_Locus_1407_Transcript_6/6_Confidence_0.200_Length_957,<br/> SampleTS1_Locus_23722_Transcript_4/4_Confidence_0.000_Length_1687<br/> , Sample3_Locus_11117_Transcript_5/5_Confidence_0.250_Length_3512,<br/> Sample1_Locus_18264_Transcript_1/3_Confidence_0.333_Length_1805,<br/> Sample6_Locus_1443_Transcript_1/3_Confidence_0.750_Length_1752,</p> |
|--|--|--|--|--------------------------------------------------------------------------------------------------------------------------------------------------------------------------------------------------------------------------------------------------------------------------------------------------------------------------------------------------------------------------------------------------------------------------------------------------------------------------------------------------------------------------------------------------------------------------------------------------------------------------------------------------------------------------------------------------------------------------------------------------------------------------------------------------------------------------------------------------------------------------------------------------------------------------------------------------------------------------------------------------------------------------------------------------------------------------------------------------------------------------------------------------------------------------------------------------------------------------------------------------------------------------------------------------------------------------------------------------------------------------------------------------------------------------------------------------------------------------------------------------------------------------------------------------------------------------------------------------------------------------------------------------------------------------------------------------------------------------------------------------------------------------------------------------------------------------------------------------------------------------------------------------------------------------------------------------------------------------------------------------------------------------------------------------------------------------------------------------------------------------------------------------------------------------------------------------------------------------------------------------------------------------------------------------------------------------------------------------------------------------------------------------------------------------------------------------------------------------------------------------------------------------------------------------------------------------------------------------------------------------------------------------------------------------------------------------------------------------------------------------------------------------------------------------------------------------------------------------------------------------------------------------------------------------------------------------------------------------------------------------------------------------------------------------------------------------------------------------------------------------------------------------------------------------------------------------------------------------------------------------------------------------------------------------------------------------------------------------------------------------------------------------------------------------------------------------------------------------------------------------------------------------------------------------------------------------------------------------------------------------------------------------------------------------------------------------------------------------------------------------------------------------------------------------------------------------------------------------------------------------------------------------------------------------------------------------------------------------------------------------------------------------------------------------------------------------------------------------------------------------------------------------------------------------------------------------------------------------------------------------------------------------------------------------------------------------------------------------------------------------------------------------------------------------------------------------------------------------------------------------------------------------------------------------------------------------------------------------------------------------------------------------------------------------------------------------------------------------------------------------------------------------------------------------------------------------------------------------------------------------------------------------------------------------------------------------|

|  |  |  |  |                                                                                                                                                                                                                                                                                                                                                                                                                                                                                                                                                                                                                                                                                                                                                                                                                                                                                                                                                                                                                                                                                                                                                                                                                                                                                                                                                                                                                                                                                                                                                                                                                                                                                                                                                                                                                                                                                                                                                                                                                                                                                                                                                                                                                                                                                                                                                                                                                                                                                                                                                                                                                                                                                                                                                                                                                                                                                                                                                                                                                                                                                                                                                                                                                                                                                                                                                                                                                                                                                                                                                                                                                                                                                                                                                                                                                                                                                                                                                                                                                                                                                                                                                                                                                                                                                                                                                                                                                                                                                                                                                                                                                                                                                                                                                                                                                                                                                                                                                                                                                                                                      |
|--|--|--|--|----------------------------------------------------------------------------------------------------------------------------------------------------------------------------------------------------------------------------------------------------------------------------------------------------------------------------------------------------------------------------------------------------------------------------------------------------------------------------------------------------------------------------------------------------------------------------------------------------------------------------------------------------------------------------------------------------------------------------------------------------------------------------------------------------------------------------------------------------------------------------------------------------------------------------------------------------------------------------------------------------------------------------------------------------------------------------------------------------------------------------------------------------------------------------------------------------------------------------------------------------------------------------------------------------------------------------------------------------------------------------------------------------------------------------------------------------------------------------------------------------------------------------------------------------------------------------------------------------------------------------------------------------------------------------------------------------------------------------------------------------------------------------------------------------------------------------------------------------------------------------------------------------------------------------------------------------------------------------------------------------------------------------------------------------------------------------------------------------------------------------------------------------------------------------------------------------------------------------------------------------------------------------------------------------------------------------------------------------------------------------------------------------------------------------------------------------------------------------------------------------------------------------------------------------------------------------------------------------------------------------------------------------------------------------------------------------------------------------------------------------------------------------------------------------------------------------------------------------------------------------------------------------------------------------------------------------------------------------------------------------------------------------------------------------------------------------------------------------------------------------------------------------------------------------------------------------------------------------------------------------------------------------------------------------------------------------------------------------------------------------------------------------------------------------------------------------------------------------------------------------------------------------------------------------------------------------------------------------------------------------------------------------------------------------------------------------------------------------------------------------------------------------------------------------------------------------------------------------------------------------------------------------------------------------------------------------------------------------------------------------------------------------------------------------------------------------------------------------------------------------------------------------------------------------------------------------------------------------------------------------------------------------------------------------------------------------------------------------------------------------------------------------------------------------------------------------------------------------------------------------------------------------------------------------------------------------------------------------------------------------------------------------------------------------------------------------------------------------------------------------------------------------------------------------------------------------------------------------------------------------------------------------------------------------------------------------------------------------------------------------------------------------------------------------------------------|
|  |  |  |  | <p>SampleTS1_Locus_12078_Transcript_1/1_Confidence_0.000_Length_736,<br/> Sample3_Locus_5270_Transcript_3/3_Confidence_0.000_Length_2249,<br/> SampleTS2_Locus_5041_Transcript_4/5_Confidence_0.500_Length_756,<br/> SampleTS1_Locus_8088_Transcript_1/1_Confidence_0.000_Length_2675,<br/> SampleTS1_Locus_13616_Transcript_4/6_Confidence_0.154_Length_858,<br/> SampleTS2_Locus_15504_Transcript_2/4_Confidence_0.333_Length_1132</p> <p>,</p> <p>SampleTS2_Locus_22391_Transcript_2/5_Confidence_0.700_Length_1831<br/> , SampleTS3_Locus_9956_Transcript_3/3_Confidence_0.250_Length_794,<br/> SampleTS3_Locus_5309_Transcript_8/20_Confidence_0.075_Length_1791<br/> , Sample6_Locus_25614_Transcript_1/2_Confidence_1.000_Length_1993,<br/> Sample6_Locus_18158_Transcript_1/1_Confidence_0.000_Length_973,<br/> Sample3_Locus_2946_Transcript_11/14_Confidence_0.115_Length_1840,<br/> SampleTS1_Locus_9204_Transcript_11/12_Confidence_0.077_Length_285<br/> 3,</p> <p>SampleTS2_Locus_21085_Transcript_4/5_Confidence_0.571_Length_1602<br/> , Sample6_Locus_9200_Transcript_1/1_Confidence_0.000_Length_2654,<br/> SampleTS2_Locus_2441_Transcript_3/5_Confidence_0.500_Length_1920,<br/> SampleTS3_Locus_25647_Transcript_1/1_Confidence_0.000_Length_360,<br/> Sample3_Locus_4871_Transcript_6/8_Confidence_0.440_Length_1214,<br/> Sample6_Locus_3178_Transcript_6/6_Confidence_0.222_Length_1425,<br/> Sample3_Locus_1409_Transcript_6/7_Confidence_0.286_Length_3090,<br/> Sample6_Locus_6095_Transcript_5/10_Confidence_0.250_Length_1483,<br/> Sample3_Locus_1573_Transcript_4/5_Confidence_0.286_Length_2133,<br/> Sample3_Locus_1963_Transcript_4/4_Confidence_0.000_Length_950,<br/> Sample3_Locus_3435_Transcript_1/2_Confidence_0.333_Length_1240,<br/> Sample3_Locus_4668_Transcript_5/5_Confidence_0.000_Length_1437,<br/> Sample1_Locus_18669_Transcript_5/17_Confidence_0.008_Length_1835,<br/> Sample6_Locus_6095_Transcript_7/10_Confidence_0.000_Length_1419,<br/> Sample6_Locus_4583_Transcript_1/1_Confidence_0.000_Length_759,<br/> Sample1_Locus_23436_Transcript_1/2_Confidence_0.333_Length_673,<br/> SampleTS1_Locus_27154_Transcript_1/1_Confidence_0.000_Length_1250</p> <p>,</p> <p>SampleTS1_Locus_1021_Transcript_1/8_Confidence_0.100_Length_1554,<br/> SampleTS3_Locus_6559_Transcript_1/5_Confidence_0.375_Length_3431,<br/> Sample3_Locus_6505_Transcript_4/8_Confidence_0.545_Length_2485,<br/> Sample1_Locus_23910_Transcript_3/3_Confidence_0.000_Length_1374,<br/> Sample3_Locus_5615_Transcript_4/4_Confidence_0.000_Length_2332,<br/> Sample6_Locus_3633_Transcript_29/29_Confidence_0.014_Length_1436,<br/> Sample3_Locus_542_Transcript_7/8_Confidence_0.333_Length_2614,<br/> Sample6_Locus_12915_Transcript_1/2_Confidence_0.333_Length_449,<br/> Sample3_Locus_450_Transcript_9/16_Confidence_0.476_Length_3424,<br/> Sample3_Locus_23759_Transcript_1/2_Confidence_0.333_Length_870,<br/> SampleTS1_Locus_2824_Transcript_1/2_Confidence_0.667_Length_2271,<br/> Sample6_Locus_6064_Transcript_22/31_Confidence_0.237_Length_4671,<br/> Sample3_Locus_7171_Transcript_1/2_Confidence_0.333_Length_591,<br/> Sample6_Locus_655_Transcript_11/16_Confidence_0.278_Length_1559,<br/> Sample6_Locus_1856_Transcript_4/5_Confidence_0.200_Length_2451,<br/> Sample6_Locus_6979_Transcript_7/9_Confidence_0.133_Length_1066,<br/> Sample3_Locus_182_Transcript_7/15_Confidence_0.357_Length_1190,<br/> Sample6_Locus_23006_Transcript_3/4_Confidence_0.333_Length_1913,<br/> Sample3_Locus_733_Transcript_9/13_Confidence_0.176_Length_669,<br/> SampleTS2_Locus_150_Transcript_3/9_Confidence_0.071_Length_2961,<br/> Sample6_Locus_22197_Transcript_1/1_Confidence_0.000_Length_722,<br/> SampleTS2_Locus_3665_Transcript_1/1_Confidence_0.000_Length_1325,<br/> Sample6_Locus_4336_Transcript_6/7_Confidence_0.100_Length_1059,<br/> Sample3_Locus_5314_Transcript_7/11_Confidence_0.300_Length_2313,<br/> Sample3_Locus_6357_Transcript_4/4_Confidence_0.000_Length_1942,<br/> SampleTS1_Locus_7257_Transcript_1/1_Confidence_0.000_Length_2715,<br/> SampleTS3_Locus_3402_Transcript_1/2_Confidence_0.333_Length_782,<br/> Sample1_Locus_20036_Transcript_3/5_Confidence_0.286_Length_983,<br/> Sample3_Locus_11046_Transcript_10/13_Confidence_0.231_Length_2112</p> <p>,</p> <p>SampleTS2_Locus_24342_Transcript_1/1_Confidence_0.000_Length_766,<br/> Sample3_Locus_3455_Transcript_2/4_Confidence_0.444_Length_3322,<br/> Sample6_Locus_717_Transcript_19/21_Confidence_0.138_Length_5498,<br/> Sample6_Locus_1912_Transcript_4/4_Confidence_0.200_Length_866,<br/> SampleTS1_Locus_10744_Transcript_1/2_Confidence_0.750_Length_662,<br/> Sample6_Locus_5970_Transcript_2/3_Confidence_0.333_Length_1694,<br/> SampleTS1_Locus_411_Transcript_4/5_Confidence_0.400_Length_1732,<br/> SampleTS1_Locus_3753_Transcript_6/9_Confidence_0.286_Length_4045,<br/> SampleTS1_Locus_13697_Transcript_1/1_Confidence_0.000_Length_807,<br/> Sample6_Locus_6776_Transcript_2/2_Confidence_0.000_Length_1183,</p> |
|--|--|--|--|----------------------------------------------------------------------------------------------------------------------------------------------------------------------------------------------------------------------------------------------------------------------------------------------------------------------------------------------------------------------------------------------------------------------------------------------------------------------------------------------------------------------------------------------------------------------------------------------------------------------------------------------------------------------------------------------------------------------------------------------------------------------------------------------------------------------------------------------------------------------------------------------------------------------------------------------------------------------------------------------------------------------------------------------------------------------------------------------------------------------------------------------------------------------------------------------------------------------------------------------------------------------------------------------------------------------------------------------------------------------------------------------------------------------------------------------------------------------------------------------------------------------------------------------------------------------------------------------------------------------------------------------------------------------------------------------------------------------------------------------------------------------------------------------------------------------------------------------------------------------------------------------------------------------------------------------------------------------------------------------------------------------------------------------------------------------------------------------------------------------------------------------------------------------------------------------------------------------------------------------------------------------------------------------------------------------------------------------------------------------------------------------------------------------------------------------------------------------------------------------------------------------------------------------------------------------------------------------------------------------------------------------------------------------------------------------------------------------------------------------------------------------------------------------------------------------------------------------------------------------------------------------------------------------------------------------------------------------------------------------------------------------------------------------------------------------------------------------------------------------------------------------------------------------------------------------------------------------------------------------------------------------------------------------------------------------------------------------------------------------------------------------------------------------------------------------------------------------------------------------------------------------------------------------------------------------------------------------------------------------------------------------------------------------------------------------------------------------------------------------------------------------------------------------------------------------------------------------------------------------------------------------------------------------------------------------------------------------------------------------------------------------------------------------------------------------------------------------------------------------------------------------------------------------------------------------------------------------------------------------------------------------------------------------------------------------------------------------------------------------------------------------------------------------------------------------------------------------------------------------------------------------------------------------------------------------------------------------------------------------------------------------------------------------------------------------------------------------------------------------------------------------------------------------------------------------------------------------------------------------------------------------------------------------------------------------------------------------------------------------------------------------------------------------------------------------|

|  |  |  |  |                                                                                                                                                                                                                                                                                                                                                                                                                                                                                                                                                                                                                                                                                                                                                                                                                                                                                                                                                                                                                                                                                                                                                                                                                                                                                                                                                                                                                                                                                                                                                                                                                                                                                                                                                                                                                                                                                                                                                                                                                                                                                                                                                                                                                                                                                                                                                                                                                                                                                                                                                                                                                                                                                                                                                                                                                                                                                                                                                                                                                                                                                                                                                                                                                                                                                                                                                                                                                                                                                                                                                                                                                                                                                                                                                                                                                                                                                                                                                                                                                                                                                                                                                                                                                                                                                                                                                                                                                                                                                                                                                                                                                                                                                                                                                                                                                                                                                                                                                                               |
|--|--|--|--|-------------------------------------------------------------------------------------------------------------------------------------------------------------------------------------------------------------------------------------------------------------------------------------------------------------------------------------------------------------------------------------------------------------------------------------------------------------------------------------------------------------------------------------------------------------------------------------------------------------------------------------------------------------------------------------------------------------------------------------------------------------------------------------------------------------------------------------------------------------------------------------------------------------------------------------------------------------------------------------------------------------------------------------------------------------------------------------------------------------------------------------------------------------------------------------------------------------------------------------------------------------------------------------------------------------------------------------------------------------------------------------------------------------------------------------------------------------------------------------------------------------------------------------------------------------------------------------------------------------------------------------------------------------------------------------------------------------------------------------------------------------------------------------------------------------------------------------------------------------------------------------------------------------------------------------------------------------------------------------------------------------------------------------------------------------------------------------------------------------------------------------------------------------------------------------------------------------------------------------------------------------------------------------------------------------------------------------------------------------------------------------------------------------------------------------------------------------------------------------------------------------------------------------------------------------------------------------------------------------------------------------------------------------------------------------------------------------------------------------------------------------------------------------------------------------------------------------------------------------------------------------------------------------------------------------------------------------------------------------------------------------------------------------------------------------------------------------------------------------------------------------------------------------------------------------------------------------------------------------------------------------------------------------------------------------------------------------------------------------------------------------------------------------------------------------------------------------------------------------------------------------------------------------------------------------------------------------------------------------------------------------------------------------------------------------------------------------------------------------------------------------------------------------------------------------------------------------------------------------------------------------------------------------------------------------------------------------------------------------------------------------------------------------------------------------------------------------------------------------------------------------------------------------------------------------------------------------------------------------------------------------------------------------------------------------------------------------------------------------------------------------------------------------------------------------------------------------------------------------------------------------------------------------------------------------------------------------------------------------------------------------------------------------------------------------------------------------------------------------------------------------------------------------------------------------------------------------------------------------------------------------------------------------------------------------------------------------------------------|
|  |  |  |  | <p>SampleTS2_Locus_2611_Transcript_4/5_Confidence_0.143_Length_1901,<br/> Sample3_Locus_1962_Transcript_1/3_Confidence_0.333_Length_2237,<br/> SampleTS1_Locus_6958_Transcript_5/8_Confidence_0.429_Length_1672,<br/> Sample1_Locus_22269_Transcript_4/4_Confidence_0.333_Length_3009,<br/> Sample3_Locus_13026_Transcript_4/6_Confidence_0.320_Length_2029,<br/> SampleTS2_Locus_923_Transcript_3/4_Confidence_0.400_Length_925,<br/> Sample3_Locus_22917_Transcript_6/12_Confidence_0.267_Length_1675,<br/> SampleTS3_Locus_19797_Transcript_3/3_Confidence_0.000_Length_1329</p> <p>,</p> <p>SampleTS3_Locus_1460_Transcript_4/5_Confidence_0.600_Length_1005,<br/> Sample6_Locus_6166_Transcript_4/5_Confidence_0.400_Length_3519,<br/> SampleTS2_Locus_3082_Transcript_1/4_Confidence_0.429_Length_1115,<br/> SampleTS1_Locus_102_Transcript_7/24_Confidence_0.073_Length_1592,<br/> SampleTS3_Locus_8121_Transcript_3/5_Confidence_0.600_Length_1476,<br/> Sample3_Locus_10180_Transcript_4/6_Confidence_0.500_Length_2179,<br/> Sample3_Locus_6982_Transcript_5/15_Confidence_0.079_Length_800,<br/> Sample6_Locus_4492_Transcript_6/8_Confidence_0.429_Length_1081,<br/> SampleTS2_Locus_9225_Transcript_2/2_Confidence_0.000_Length_1735,<br/> Sample6_Locus_9272_Transcript_1/1_Confidence_0.000_Length_455,<br/> Sample3_Locus_29450_Transcript_1/1_Confidence_0.000_Length_934,<br/> Sample3_Locus_315_Transcript_16/20_Confidence_0.074_Length_3675,<br/> Sample6_Locus_5614_Transcript_1/1_Confidence_0.000_Length_834,<br/> Sample1_Locus_24238_Transcript_3/4_Confidence_0.400_Length_1703,<br/> Sample3_Locus_4755_Transcript_1/2_Confidence_0.667_Length_1045,<br/> Sample6_Locus_23152_Transcript_1/1_Confidence_0.000_Length_978,<br/> Sample3_Locus_8213_Transcript_2/3_Confidence_0.333_Length_1530,<br/> Sample3_Locus_7479_Transcript_6/7_Confidence_0.019_Length_895,<br/> SampleTS3_Locus_10854_Transcript_2/5_Confidence_0.667_Length_1018</p> <p>, Sample6_Locus_15076_Transcript_3/5_Confidence_0.375_Length_1959,<br/> Sample6_Locus_3087_Transcript_12/15_Confidence_0.200_Length_3172,<br/> Sample3_Locus_18821_Transcript_3/4_Confidence_0.333_Length_1725,<br/> SampleTS3_Locus_11257_Transcript_2/3_Confidence_0.333_Length_2353</p> <p>,</p> <p>SampleTS1_Locus_3593_Transcript_3/9_Confidence_0.333_Length_4391,<br/> SampleTS1_Locus_8184_Transcript_3/5_Confidence_0.400_Length_3710,<br/> Sample6_Locus_30028_Transcript_1/2_Confidence_0.333_Length_1025,<br/> SampleTS3_Locus_1032_Transcript_5/6_Confidence_0.286_Length_1670,<br/> Sample3_Locus_1637_Transcript_14/16_Confidence_0.317_Length_2963,<br/> SampleTS1_Locus_3499_Transcript_2/4_Confidence_0.333_Length_3331,<br/> SampleTS1_Locus_27733_Transcript_1/1_Confidence_0.000_Length_647,<br/> Sample6_Locus_5499_Transcript_1/1_Confidence_0.000_Length_545,<br/> Sample3_Locus_8292_Transcript_18/19_Confidence_0.222_Length_11337</p> <p>, Sample3_Locus_20305_Transcript_4/9_Confidence_0.417_Length_708,<br/> SampleTS2_Locus_7833_Transcript_5/5_Confidence_0.429_Length_1991,<br/> Sample3_Locus_975_Transcript_6/34_Confidence_0.159_Length_709,<br/> Sample6_Locus_16096_Transcript_4/4_Confidence_0.286_Length_1064,<br/> Sample3_Locus_7036_Transcript_25/26_Confidence_0.147_Length_13961</p> <p>,</p> <p>SampleTS1_Locus_24533_Transcript_3/3_Confidence_0.000_Length_1163</p> <p>, Sample3_Locus_1985_Transcript_7/8_Confidence_0.062_Length_1287,<br/> Sample6_Locus_18554_Transcript_1/4_Confidence_0.222_Length_1011,<br/> SampleTS3_Locus_3563_Transcript_3/8_Confidence_0.500_Length_2008,<br/> Sample6_Locus_10878_Transcript_6/8_Confidence_0.273_Length_1218,<br/> Sample6_Locus_2442_Transcript_4/16_Confidence_0.038_Length_1846,<br/> Sample1_Locus_18633_Transcript_5/7_Confidence_0.333_Length_1633,<br/> SampleTS3_Locus_1476_Transcript_12/16_Confidence_0.250_Length_154</p> <p>2,</p> <p>SampleTS1_Locus_28320_Transcript_1/1_Confidence_0.000_Length_695,<br/> Sample6_Locus_8847_Transcript_4/5_Confidence_0.200_Length_4092,<br/> SampleTS2_Locus_13751_Transcript_1/2_Confidence_0.333_Length_661,<br/> SampleTS2_Locus_6386_Transcript_1/2_Confidence_0.667_Length_1527,<br/> Sample3_Locus_4090_Transcript_10/14_Confidence_0.353_Length_4125,<br/> SampleTS3_Locus_2656_Transcript_1/1_Confidence_0.000_Length_1732,<br/> Sample6_Locus_26409_Transcript_1/1_Confidence_0.000_Length_1698,<br/> SampleTS1_Locus_1925_Transcript_1/17_Confidence_0.089_Length_540,<br/> SampleTS2_Locus_5418_Transcript_1/1_Confidence_0.000_Length_2770,<br/> Sample6_Locus_14840_Transcript_1/3_Confidence_0.333_Length_1085,<br/> SampleTS1_Locus_22896_Transcript_1/1_Confidence_0.000_Length_1681</p> <p>,</p> <p>SampleTS3_Locus_10197_Transcript_4/10_Confidence_0.056_Length_103</p> <p>0,</p> <p>Sample6_Locus_3002_Transcript_11/25_Confidence_0.257_Length_1088,<br/> Sample3_Locus_9057_Transcript_4/5_Confidence_0.200_Length_803,</p> |
|--|--|--|--|-------------------------------------------------------------------------------------------------------------------------------------------------------------------------------------------------------------------------------------------------------------------------------------------------------------------------------------------------------------------------------------------------------------------------------------------------------------------------------------------------------------------------------------------------------------------------------------------------------------------------------------------------------------------------------------------------------------------------------------------------------------------------------------------------------------------------------------------------------------------------------------------------------------------------------------------------------------------------------------------------------------------------------------------------------------------------------------------------------------------------------------------------------------------------------------------------------------------------------------------------------------------------------------------------------------------------------------------------------------------------------------------------------------------------------------------------------------------------------------------------------------------------------------------------------------------------------------------------------------------------------------------------------------------------------------------------------------------------------------------------------------------------------------------------------------------------------------------------------------------------------------------------------------------------------------------------------------------------------------------------------------------------------------------------------------------------------------------------------------------------------------------------------------------------------------------------------------------------------------------------------------------------------------------------------------------------------------------------------------------------------------------------------------------------------------------------------------------------------------------------------------------------------------------------------------------------------------------------------------------------------------------------------------------------------------------------------------------------------------------------------------------------------------------------------------------------------------------------------------------------------------------------------------------------------------------------------------------------------------------------------------------------------------------------------------------------------------------------------------------------------------------------------------------------------------------------------------------------------------------------------------------------------------------------------------------------------------------------------------------------------------------------------------------------------------------------------------------------------------------------------------------------------------------------------------------------------------------------------------------------------------------------------------------------------------------------------------------------------------------------------------------------------------------------------------------------------------------------------------------------------------------------------------------------------------------------------------------------------------------------------------------------------------------------------------------------------------------------------------------------------------------------------------------------------------------------------------------------------------------------------------------------------------------------------------------------------------------------------------------------------------------------------------------------------------------------------------------------------------------------------------------------------------------------------------------------------------------------------------------------------------------------------------------------------------------------------------------------------------------------------------------------------------------------------------------------------------------------------------------------------------------------------------------------------------------------------------------------------|

|                                        |          |   |                                                |      |                                                                                                                                                                                                                                                                                                                                                                                                                                                                                                                                                                                                                                                                                                                                                                                                                                                                                                                                                                                                                                                                                                                                                                                                                                                                                                                                                                                                  |
|----------------------------------------|----------|---|------------------------------------------------|------|--------------------------------------------------------------------------------------------------------------------------------------------------------------------------------------------------------------------------------------------------------------------------------------------------------------------------------------------------------------------------------------------------------------------------------------------------------------------------------------------------------------------------------------------------------------------------------------------------------------------------------------------------------------------------------------------------------------------------------------------------------------------------------------------------------------------------------------------------------------------------------------------------------------------------------------------------------------------------------------------------------------------------------------------------------------------------------------------------------------------------------------------------------------------------------------------------------------------------------------------------------------------------------------------------------------------------------------------------------------------------------------------------|
|                                        |          |   |                                                |      | <p>Sample6_Locus_6606_Transcript_8/20_Confidence_0.082_Length_1322,<br/> SampleTS2_Locus_8111_Transcript_10/12_Confidence_0.231_Length_283<br/> 1,<br/> SampleTS3_Locus_22958_Transcript_1/1_Confidence_0.000_Length_1054<br/> , Sample1_Locus_26944_Transcript_1/1_Confidence_0.000_Length_1423,<br/> Sample6_Locus_10169_Transcript_6/7_Confidence_0.607_Length_1376,<br/> Sample6_Locus_15179_Transcript_8/9_Confidence_0.429_Length_2067,<br/> Sample6_Locus_7700_Transcript_3/5_Confidence_0.133_Length_3205,<br/> SampleTS2_Locus_16641_Transcript_4/4_Confidence_0.222_Length_618,<br/> SampleTS2_Locus_10767_Transcript_2/2_Confidence_0.000_Length_757,<br/> Sample1_Locus_18923_Transcript_1/1_Confidence_0.000_Length_2951,<br/> Sample3_Locus_4819_Transcript_7/10_Confidence_0.250_Length_2758,<br/> Sample1_Locus_28199_Transcript_1/2_Confidence_0.750_Length_954,<br/> Sample3_Locus_4289_Transcript_3/4_Confidence_0.333_Length_3187,<br/> SampleTS3_Locus_4352_Transcript_2/3_Confidence_0.333_Length_1615,<br/> SampleTS3_Locus_18815_Transcript_3/4_Confidence_0.667_Length_1114<br/> , Sample6_Locus_28156_Transcript_2/3_Confidence_0.750_Length_396,<br/> Sample6_Locus_14369_Transcript_1/1_Confidence_0.000_Length_645,<br/> Sample6_Locus_10316_Transcript_3/8_Confidence_0.156_Length_721,<br/> SampleTS1_Locus_3702_Transcript_16/16_Confidence_0.120_Length_803</p> |
| <b>Lipopolysaccharide biosynthesis</b> | map00540 | 2 | ec:2.5.1.55 synthase,<br>ec:5.3.1.13 isomerase | 1, 4 | <p>SampleTS2_Locus_561_Transcript_5/5_Confidence_0.381_Length_1130,<br/> SampleTS3_Locus_1536_Transcript_4/6_Confidence_0.200_Length_1265,<br/> Sample6_Locus_2624_Transcript_5/10_Confidence_0.059_Length_1316,<br/> SampleTS3_Locus_10968_Transcript_8/14_Confidence_0.097_Length_118<br/> 0, Sample3_Locus_3559_Transcript_2/6_Confidence_0.200_Length_1280</p>                                                                                                                                                                                                                                                                                                                                                                                                                                                                                                                                                                                                                                                                                                                                                                                                                                                                                                                                                                                                                               |



|                                               |          |   |                                                                           |       |                                                                                                                                                                                                                                                                                                                                                                                                                                                                                                                                                                                                                                                                                                                                                                                                                                                                                                                                                                                                                             |
|-----------------------------------------------|----------|---|---------------------------------------------------------------------------|-------|-----------------------------------------------------------------------------------------------------------------------------------------------------------------------------------------------------------------------------------------------------------------------------------------------------------------------------------------------------------------------------------------------------------------------------------------------------------------------------------------------------------------------------------------------------------------------------------------------------------------------------------------------------------------------------------------------------------------------------------------------------------------------------------------------------------------------------------------------------------------------------------------------------------------------------------------------------------------------------------------------------------------------------|
| <b>mTOR signaling pathway</b>                 | map04150 | 2 | ec:2.7.11.11 protein kinase, ec:2.7.11.24 protein kinase                  | 3, 6  | SampleTS1_Locus_170_Transcript_6/14_Confidence_0.556_Length_3699, Sample6_Locus_5763_Transcript_4/9_Confidence_0.625_Length_2241, SampleTS1_Locus_7915_Transcript_5/6_Confidence_0.074_Length_2827, Sample3_Locus_9819_Transcript_4/6_Confidence_0.300_Length_1186, Sample1_Locus_5473_Transcript_2/5_Confidence_0.400_Length_2142, Sample3_Locus_737_Transcript_6/9_Confidence_0.308_Length_1795, Sample1_Locus_1971_Transcript_3/6_Confidence_0.571_Length_1795, SampleTS1_Locus_5021_Transcript_2/3_Confidence_0.333_Length_1762, Sample6_Locus_21874_Transcript_4/6_Confidence_0.500_Length_1364                                                                                                                                                                                                                                                                                                                                                                                                                        |
| <b>Other types of Oglycan biosynthesis</b>    | map00514 | 2 | ec:2.4.1.109 mannosyltransferase, ec:2.4.99.1 alpha(2,6)sialyltransferase | 1, 14 | Sample6_Locus_2970_Transcript_1/3_Confidence_0.600_Length_1024, Sample6_Locus_19814_Transcript_10/10_Confidence_0.483_Length_1044, Sample3_Locus_19889_Transcript_1/1_Confidence_0.000_Length_1128, SampleTS2_Locus_4156_Transcript_29/43_Confidence_0.097_Length_1215, SampleTS2_Locus_5330_Transcript_4/5_Confidence_0.429_Length_1628, SampleTS1_Locus_13929_Transcript_3/7_Confidence_0.091_Length_1486, Sample6_Locus_5906_Transcript_9/11_Confidence_0.333_Length_2015, Sample6_Locus_6485_Transcript_12/18_Confidence_0.490_Length_1417, Sample1_Locus_19212_Transcript_2/4_Confidence_0.333_Length_2192, Sample3_Locus_191_Transcript_86/118_Confidence_0.018_Length_2298, Sample3_Locus_12595_Transcript_4/8_Confidence_0.364_Length_2480, SampleTS1_Locus_993_Transcript_3/9_Confidence_0.083_Length_1910, Sample3_Locus_25591_Transcript_4/4_Confidence_0.000_Length_1038, SampleTS2_Locus_11455_Transcript_4/10_Confidence_0.630_Length_1058, SampleTS1_Locus_21367_Transcript_2/3_Confidence_0.429_Length_1441 |
| <b>Phosphonate and phosphinate metabolism</b> | map00440 | 2 | ec:2.7.7.14 cytidyltransferase, ec:2.7.7.15 cytidyltransferase            | 1, 1  | SampleTS3_Locus_256_Transcript_7/9_Confidence_0.444_Length_1142, SampleTS3_Locus_256_Transcript_7/9_Confidence_0.444_Length_1142                                                                                                                                                                                                                                                                                                                                                                                                                                                                                                                                                                                                                                                                                                                                                                                                                                                                                            |
| <b>Taurine and hypotaurine metabolism</b>     | map00430 | 2 | ec:4.1.1.15 decarboxylase, ec:2.3.2.2 glutamyl transpeptidase             | 1, 1  | SampleTS3_Locus_5084_Transcript_15/17_Confidence_0.206_Length_1751, Sample1_Locus_19449_Transcript_1/1_Confidence_0.000_Length_1704                                                                                                                                                                                                                                                                                                                                                                                                                                                                                                                                                                                                                                                                                                                                                                                                                                                                                         |

|                                                      |          |   |                                                                              |       |                                                                                                                                                                                                                                                                                                                                                                                                                                                                                                                                                                                                                                                                                                                                                    |
|------------------------------------------------------|----------|---|------------------------------------------------------------------------------|-------|----------------------------------------------------------------------------------------------------------------------------------------------------------------------------------------------------------------------------------------------------------------------------------------------------------------------------------------------------------------------------------------------------------------------------------------------------------------------------------------------------------------------------------------------------------------------------------------------------------------------------------------------------------------------------------------------------------------------------------------------------|
| <b>Polyketide sugar unit biosynthesis</b>            | map00523 | 2 | ec:1.1.1.133 reductase, ec:5.1.3.13 3,5epimerase                             | 2, 1  | Sample3_Locus_2806_Transcript_6/14_Confidence_0.167_Length_1197, SampleTS2_Locus_1881_Transcript_15/19_Confidence_0.439_Length_912, Sample3_Locus_2806_Transcript_6/14_Confidence_0.167_Length_1197                                                                                                                                                                                                                                                                                                                                                                                                                                                                                                                                                |
| <b>Linoleic acid metabolism</b>                      | map00591 | 2 | ec:3.1.1.4 A2, ec:1.14.19.3 6desaturase                                      | 4, 1  | SampleTS1_Locus_587_Transcript_4/24_Confidence_0.067_Length_950, SampleTS2_Locus_23527_Transcript_1/1_Confidence_0.000_Length_1031, SampleTS1_Locus_11100_Transcript_2/5_Confidence_0.286_Length_1260, SampleTS3_Locus_8220_Transcript_1/4_Confidence_0.667_Length_1081, SampleTS2_Locus_20864_Transcript_2/3_Confidence_0.667_Length_860                                                                                                                                                                                                                                                                                                                                                                                                          |
| <b>Sesquiterpenoid and triterpenoid biosynthesis</b> | map00909 | 2 | ec:1.1.1.216 dehydrogenase (NADP+), ec:2.5.1.21 synthase                     | 1, 1  | SampleTS1_Locus_13725_Transcript_2/7_Confidence_0.333_Length_1080, Sample6_Locus_901_Transcript_6/8_Confidence_0.643_Length_1628                                                                                                                                                                                                                                                                                                                                                                                                                                                                                                                                                                                                                   |
| <b>Vitamin B6 metabolism</b>                         | map00750 | 2 | ec:2.6.1.52 transaminase, ec:4.2.3.1 synthase                                | 1, 2  | Sample1_Locus_9264_Transcript_1/1_Confidence_0.000_Length_1678, Sample6_Locus_4215_Transcript_12/29_Confidence_0.125_Length_1509, Sample6_Locus_4215_Transcript_14/29_Confidence_0.069_Length_739                                                                                                                                                                                                                                                                                                                                                                                                                                                                                                                                                  |
| <b>Mucin type Oglycan biosynthesis</b>               | map00512 | 2 | ec:2.4.99.4 alpha2,3sialyltransferase, ec:2.4.99.3 alpha2,6sialyltransferase | 10, 1 | Sample6_Locus_1667_Transcript_21/40_Confidence_0.198_Length_1348, Sample6_Locus_6485_Transcript_12/18_Confidence_0.490_Length_1417, Sample6_Locus_22436_Transcript_2/2_Confidence_0.333_Length_1831, Sample3_Locus_191_Transcript_86/118_Confidence_0.018_Length_2298, Sample3_Locus_19889_Transcript_1/1_Confidence_0.000_Length_1128, SampleTS2_Locus_4156_Transcript_29/43_Confidence_0.097_Length_1215, SampleTS1_Locus_10921_Transcript_5/7_Confidence_0.444_Length_843, Sample6_Locus_28634_Transcript_1/2_Confidence_0.333_Length_832, SampleTS1_Locus_13929_Transcript_3/7_Confidence_0.091_Length_1486, SampleTS1_Locus_6551_Transcript_6/13_Confidence_0.111_Length_1643, Sample6_Locus_28634_Transcript_1/2_Confidence_0.333_Length_832 |
| <b>Other glycan degradation</b>                      | map00511 | 2 | ec:3.2.1.24 alphaDmannosidase, ec:3.2.1.23 lactase (ambiguous)               | 1, 1  | Sample6_Locus_6857_Transcript_8/11_Confidence_0.273_Length_3549, SampleTS2_Locus_9286_Transcript_1/1_Confidence_0.000_Length_2119                                                                                                                                                                                                                                                                                                                                                                                                                                                                                                                                                                                                                  |

|                                                        |          |   |                                                                                         |      |                                                                                                                                                                                                                                                                                                                                                                                                                                                                                                                                                   |
|--------------------------------------------------------|----------|---|-----------------------------------------------------------------------------------------|------|---------------------------------------------------------------------------------------------------------------------------------------------------------------------------------------------------------------------------------------------------------------------------------------------------------------------------------------------------------------------------------------------------------------------------------------------------------------------------------------------------------------------------------------------------|
| <b>Limonene and pinene degradation</b>                 | map00903 | 2 | ec:4.2.1.17 hydratase, ec:1.2.1.3 dehydrogenase (NAD+)                                  | 2, 6 | SampleTS1_Locus_789_Transcript_9/11_Confidence_0.238_Length_2300, Sample3_Locus_5282_Transcript_2/7_Confidence_0.700_Length_1266, SampleTS3_Locus_23038_Transcript_2/3_Confidence_0.333_Length_1864 , SampleTS2_Locus_4874_Transcript_6/12_Confidence_0.158_Length_1042 , Sample3_Locus_23176_Transcript_2/3_Confidence_0.333_Length_1282, SampleTS1_Locus_5373_Transcript_26/33_Confidence_0.065_Length_162 0, Sample6_Locus_12695_Transcript_1/2_Confidence_0.333_Length_2218, SampleTS3_Locus_23264_Transcript_1/3_Confidence_0.500_Length_845 |
| <b>Insect hormone biosynthesis</b>                     | map00981 | 2 | ec:1.1.1.216 dehydrogenase (NADP+), ec:1.2.1.3 dehydrogenase (NAD+)                     | 1, 6 | SampleTS1_Locus_13725_Transcript_2/7_Confidence_0.333_Length_1080 , SampleTS3_Locus_23038_Transcript_2/3_Confidence_0.333_Length_1864 , SampleTS2_Locus_4874_Transcript_6/12_Confidence_0.158_Length_1042 , Sample3_Locus_23176_Transcript_2/3_Confidence_0.333_Length_1282, SampleTS1_Locus_5373_Transcript_26/33_Confidence_0.065_Length_162 0, Sample6_Locus_12695_Transcript_1/2_Confidence_0.333_Length_2218, SampleTS3_Locus_23264_Transcript_1/3_Confidence_0.500_Length_845                                                               |
| <b>Neomycin, kanamycin and gentamicin biosynthesis</b> | map00524 | 2 | ec:2.7.1.2 glucokinase (phosphorylating), ec:2.7.1.1 hexokinase type IV glucokinase     | 1, 1 | Sample6_Locus_5095_Transcript_5/8_Confidence_0.300_Length_1241, Sample6_Locus_5095_Transcript_5/8_Confidence_0.300_Length_1241                                                                                                                                                                                                                                                                                                                                                                                                                    |
| <b>Steroid degradation</b>                             | map00984 | 2 | ec:1.3.99.5 4dehydrogenase (acceptor), ec:1.1.1.51 17)betahydroxy steroid dehydrogenase | 2, 1 | SampleTS2_Locus_1258_Transcript_11/11_Confidence_0.182_Length_100 2, SampleTS3_Locus_4932_Transcript_2/7_Confidence_0.100_Length_697, SampleTS3_Locus_11808_Transcript_9/11_Confidence_0.565_Length_100 6                                                                                                                                                                                                                                                                                                                                         |
| <b>Atrazine degradation</b>                            | map00791 | 2 | ec:3.5.1.84 amidohydrolase , ec:3.5.1.5 ec:3.5.1.5 urease                               | 1, 1 | Sample6_Locus_14763_Transcript_11/12_Confidence_0.182_Length_1117 , SampleTS3_Locus_10659_Transcript_7/8_Confidence_0.389_Length_1749                                                                                                                                                                                                                                                                                                                                                                                                             |

|                                             |          |   |                                                                                                |       |                                                                                                                                                                                                                                                                                                                                                                                                                                                                                                                                                                                                                                                                                                                                                                                                                                                                                                                                                                                                                                                                                                                                                                                                                                                                                                                                                                                                                                                                                                                                                                                                                                                                                                                                                                                                                                                                                                                                                                                                                                                                                                                                                                                                                                                                                                                                                                                                                                                                                                                                                                                                                                                                                                                                                                                                                                                                                                                                                                                                                                                                                                                                                                                                                                                                                                                                                                                                                                                                            |
|---------------------------------------------|----------|---|------------------------------------------------------------------------------------------------|-------|----------------------------------------------------------------------------------------------------------------------------------------------------------------------------------------------------------------------------------------------------------------------------------------------------------------------------------------------------------------------------------------------------------------------------------------------------------------------------------------------------------------------------------------------------------------------------------------------------------------------------------------------------------------------------------------------------------------------------------------------------------------------------------------------------------------------------------------------------------------------------------------------------------------------------------------------------------------------------------------------------------------------------------------------------------------------------------------------------------------------------------------------------------------------------------------------------------------------------------------------------------------------------------------------------------------------------------------------------------------------------------------------------------------------------------------------------------------------------------------------------------------------------------------------------------------------------------------------------------------------------------------------------------------------------------------------------------------------------------------------------------------------------------------------------------------------------------------------------------------------------------------------------------------------------------------------------------------------------------------------------------------------------------------------------------------------------------------------------------------------------------------------------------------------------------------------------------------------------------------------------------------------------------------------------------------------------------------------------------------------------------------------------------------------------------------------------------------------------------------------------------------------------------------------------------------------------------------------------------------------------------------------------------------------------------------------------------------------------------------------------------------------------------------------------------------------------------------------------------------------------------------------------------------------------------------------------------------------------------------------------------------------------------------------------------------------------------------------------------------------------------------------------------------------------------------------------------------------------------------------------------------------------------------------------------------------------------------------------------------------------------------------------------------------------------------------------------------------------|
| <b>T cell receptor signaling pathway</b>    | map04660 | 2 | ec:3.1.3.16 phosphatase, ec:2.7.10.2 proteintyrosine kinase                                    | 49, 2 | SampleTS3_Locus_1236_Transcript_8/14_Confidence_0.379_Length_696, SampleTS1_Locus_5854_Transcript_5/5_Confidence_0.400_Length_861, Sample3_Locus_4609_Transcript_5/8_Confidence_0.444_Length_1430, SampleTS3_Locus_1630_Transcript_4/8_Confidence_0.500_Length_1635, SampleTS2_Locus_4720_Transcript_3/7_Confidence_0.667_Length_1404, Sample3_Locus_5932_Transcript_3/4_Confidence_0.571_Length_501, SampleTS3_Locus_13512_Transcript_1/3_Confidence_0.333_Length_1321, SampleTS2_Locus_1774_Transcript_4/5_Confidence_0.500_Length_990, SampleTS2_Locus_549_Transcript_10/36_Confidence_0.207_Length_1084, Sample3_Locus_14090_Transcript_2/4_Confidence_0.714_Length_1345, Sample6_Locus_5727_Transcript_3/3_Confidence_0.000_Length_2301, SampleTS3_Locus_5284_Transcript_10/12_Confidence_0.450_Length_1002, Sample3_Locus_3056_Transcript_6/6_Confidence_0.000_Length_1859, Sample3_Locus_13102_Transcript_1/2_Confidence_0.333_Length_1552, Sample1_Locus_1599_Transcript_1/1_Confidence_0.000_Length_563, SampleTS3_Locus_9298_Transcript_1/10_Confidence_0.238_Length_793, SampleTS1_Locus_2823_Transcript_2/10_Confidence_0.444_Length_2044, Sample6_Locus_4221_Transcript_5/15_Confidence_0.231_Length_1620, Sample1_Locus_9346_Transcript_2/6_Confidence_0.500_Length_949, Sample3_Locus_23182_Transcript_4/4_Confidence_0.000_Length_3946, SampleTS2_Locus_4899_Transcript_2/5_Confidence_0.357_Length_658, Sample6_Locus_594_Transcript_17/21_Confidence_0.471_Length_4353, SampleTS1_Locus_4566_Transcript_4/4_Confidence_0.000_Length_2764, SampleTS2_Locus_2599_Transcript_3/9_Confidence_0.091_Length_4008, SampleTS1_Locus_397_Transcript_66/78_Confidence_0.022_Length_711, Sample1_Locus_9441_Transcript_1/3_Confidence_0.333_Length_1512, SampleTS1_Locus_26651_Transcript_1/1_Confidence_0.000_Length_1107, SampleTS2_Locus_549_Transcript_23/36_Confidence_0.110_Length_766, Sample3_Locus_5257_Transcript_3/8_Confidence_0.333_Length_2904, Sample6_Locus_11565_Transcript_7/13_Confidence_0.097_Length_1502, Sample1_Locus_27168_Transcript_1/2_Confidence_1.000_Length_653, Sample6_Locus_24750_Transcript_4/9_Confidence_0.222_Length_785, SampleTS2_Locus_2994_Transcript_7/9_Confidence_0.235_Length_2922, Sample3_Locus_2926_Transcript_2/3_Confidence_0.750_Length_1774, SampleTS3_Locus_23494_Transcript_1/1_Confidence_0.000_Length_1156, Sample3_Locus_23102_Transcript_1/2_Confidence_0.667_Length_1067, Sample6_Locus_8346_Transcript_7/13_Confidence_0.118_Length_1292, SampleTS1_Locus_12977_Transcript_4/6_Confidence_0.429_Length_1160, SampleTS1_Locus_6027_Transcript_7/14_Confidence_0.160_Length_504, Sample3_Locus_22654_Transcript_1/1_Confidence_0.000_Length_1356, Sample6_Locus_1159_Transcript_30/32_Confidence_0.027_Length_1920, SampleTS3_Locus_2277_Transcript_3/5_Confidence_0.400_Length_1847, SampleTS1_Locus_30500_Transcript_2/2_Confidence_0.850_Length_548, Sample6_Locus_30120_Transcript_2/3_Confidence_0.667_Length_1321, SampleTS2_Locus_3992_Transcript_15/16_Confidence_0.143_Length_1808, SampleTS1_Locus_11573_Transcript_5/10_Confidence_0.211_Length_1117, Sample1_Locus_25057_Transcript_2/6_Confidence_0.727_Length_1459, SampleTS2_Locus_549_Transcript_22/36_Confidence_0.134_Length_768, Sample1_Locus_13613_Transcript_6/7_Confidence_0.111_Length_1026, SampleTS2_Locus_1249_Transcript_11/12_Confidence_0.300_Length_1726, Sample6_Locus_17366_Transcript_1/1_Confidence_0.000_Length_2652 |
| <b>Steroid hormone biosynthesis</b>         | map00140 | 2 | ec:1.1.1.151 17)betahydroxy steroid dehydrogenase, ec:2.4.1.17 1naphthol glucuronyltransferase | 1, 3  | SampleTS3_Locus_11808_Transcript_9/11_Confidence_0.565_Length_1006, Sample6_Locus_9455_Transcript_3/4_Confidence_0.200_Length_1370, SampleTS1_Locus_4303_Transcript_9/11_Confidence_0.167_Length_1464, Sample6_Locus_8395_Transcript_14/17_Confidence_0.508_Length_1568                                                                                                                                                                                                                                                                                                                                                                                                                                                                                                                                                                                                                                                                                                                                                                                                                                                                                                                                                                                                                                                                                                                                                                                                                                                                                                                                                                                                                                                                                                                                                                                                                                                                                                                                                                                                                                                                                                                                                                                                                                                                                                                                                                                                                                                                                                                                                                                                                                                                                                                                                                                                                                                                                                                                                                                                                                                                                                                                                                                                                                                                                                                                                                                                    |
| <b>Cutin, suberine and wax biosynthesis</b> | map00073 | 2 | ec:1.2.1.50 acylprotein thioester reductase, ec:2.3.1.20 Oacyltransferase                      | 1, 2  | SampleTS3_Locus_11808_Transcript_9/11_Confidence_0.565_Length_1006, Sample1_Locus_18933_Transcript_2/3_Confidence_0.714_Length_599, Sample3_Locus_18000_Transcript_1/1_Confidence_0.000_Length_845                                                                                                                                                                                                                                                                                                                                                                                                                                                                                                                                                                                                                                                                                                                                                                                                                                                                                                                                                                                                                                                                                                                                                                                                                                                                                                                                                                                                                                                                                                                                                                                                                                                                                                                                                                                                                                                                                                                                                                                                                                                                                                                                                                                                                                                                                                                                                                                                                                                                                                                                                                                                                                                                                                                                                                                                                                                                                                                                                                                                                                                                                                                                                                                                                                                                         |

|                                                                  |          |   |                                                                                 |       |                                                                                                                                                                                                                                                                                                                                                                                                                                                                                                                                                                                                                                                                                                                                                                                                                                                                                                                                      |
|------------------------------------------------------------------|----------|---|---------------------------------------------------------------------------------|-------|--------------------------------------------------------------------------------------------------------------------------------------------------------------------------------------------------------------------------------------------------------------------------------------------------------------------------------------------------------------------------------------------------------------------------------------------------------------------------------------------------------------------------------------------------------------------------------------------------------------------------------------------------------------------------------------------------------------------------------------------------------------------------------------------------------------------------------------------------------------------------------------------------------------------------------------|
| <b>Carbapenem biosynthesis</b>                                   | map00332 | 2 | ec:2.7.2.11 5kinase,<br>ec:1.2.1.41 dehydrogenase                               | 2, 3  | Sample3_Locus_23456_Transcript_1/1_Confidence_0.000_Length_1406,<br>SampleTS2_Locus_20780_Transcript_2/3_Confidence_0.600_Length_1460<br>, Sample3_Locus_23456_Transcript_1/1_Confidence_0.000_Length_1406,<br>Sample1_Locus_3087_Transcript_2/3_Confidence_0.333_Length_2354,<br>SampleTS2_Locus_20780_Transcript_2/3_Confidence_0.600_Length_1460                                                                                                                                                                                                                                                                                                                                                                                                                                                                                                                                                                                  |
| <b>Glycosphingo lipid biosynthesis lacto and neolacto series</b> | map00601 | 2 | ec:2.4.99.4 alpha2,3sialyltransferase,<br>ec:2.4.99.8 alpha2,8sialyltransferase | 10, 3 | Sample6_Locus_1667_Transcript_21/40_Confidence_0.198_Length_1348,<br>Sample6_Locus_6485_Transcript_12/18_Confidence_0.490_Length_1417,<br>Sample6_Locus_22436_Transcript_2/2_Confidence_0.333_Length_1831,<br>Sample3_Locus_191_Transcript_86/118_Confidence_0.018_Length_2298,<br>Sample3_Locus_19889_Transcript_1/1_Confidence_0.000_Length_1128,<br>SampleTS2_Locus_4156_Transcript_29/43_Confidence_0.097_Length_1215,<br>SampleTS1_Locus_10921_Transcript_5/7_Confidence_0.444_Length_843,<br>Sample6_Locus_28634_Transcript_1/2_Confidence_0.333_Length_832,<br>SampleTS1_Locus_13929_Transcript_3/7_Confidence_0.091_Length_1486<br>,<br>SampleTS1_Locus_6551_Transcript_6/13_Confidence_0.111_Length_1643<br>,<br>Sample6_Locus_6485_Transcript_12/18_Confidence_0.490_Length_1417,<br>Sample6_Locus_14905_Transcript_12/13_Confidence_0.077_Length_1757<br>, Sample6_Locus_28634_Transcript_1/2_Confidence_0.333_Length_832 |
| <b>Caffeine metabolism</b>                                       | map00232 | 1 | ec:1.7.3.3 urate hydroxylase                                                    | 1     | Sample6_Locus_2272_Transcript_5/6_Confidence_0.200_Length_1048                                                                                                                                                                                                                                                                                                                                                                                                                                                                                                                                                                                                                                                                                                                                                                                                                                                                       |
| <b>Fluorobenzoate degradation</b>                                | map00364 | 1 | ec:4.2.1.84 hydratase                                                           | 1     | Sample3_Locus_12929_Transcript_1/1_Confidence_0.000_Length_1898                                                                                                                                                                                                                                                                                                                                                                                                                                                                                                                                                                                                                                                                                                                                                                                                                                                                      |
| <b>Lipoic acid metabolism</b>                                    | map00785 | 1 | ec:2.8.1.8 synthase                                                             | 1     | SampleTS3_Locus_7280_Transcript_3/4_Confidence_0.333_Length_1159                                                                                                                                                                                                                                                                                                                                                                                                                                                                                                                                                                                                                                                                                                                                                                                                                                                                     |
| <b>Toluene degradation</b>                                       | map00623 | 1 | ec:1.1.1.35 dehydrogenase                                                       | 3     | SampleTS1_Locus_789_Transcript_9/11_Confidence_0.238_Length_2300,<br>SampleTS3_Locus_1827_Transcript_3/3_Confidence_0.000_Length_1033,<br>SampleTS3_Locus_11808_Transcript_9/11_Confidence_0.565_Length_1006                                                                                                                                                                                                                                                                                                                                                                                                                                                                                                                                                                                                                                                                                                                         |
| <b>Monoterpenoid biosynthesis</b>                                | map00902 | 1 | ec:1.3.1.81 reductase                                                           | 1     | SampleTS2_Locus_276_Transcript_13/14_Confidence_0.206_Length_1306                                                                                                                                                                                                                                                                                                                                                                                                                                                                                                                                                                                                                                                                                                                                                                                                                                                                    |

|                                                |          |   |                                          |    |                                                                                                                                                                                                                                                                                                                                                                                                                                                                                                                                                                                                                                                                                                                                                                                                                                                                                                                                                                                                                                                                                                                                                                                                                                                                                                                                                                                                                                                                                                                                                                                                                                                                                                                                                                                                                                                                                                                                                                                                                                                                                                                                                                                                                                                                                                                                                                                                                                                                                                                                                                                                                                                                                                                                                                                                                                                                                                                                                                                                                                                                                                                                  |
|------------------------------------------------|----------|---|------------------------------------------|----|----------------------------------------------------------------------------------------------------------------------------------------------------------------------------------------------------------------------------------------------------------------------------------------------------------------------------------------------------------------------------------------------------------------------------------------------------------------------------------------------------------------------------------------------------------------------------------------------------------------------------------------------------------------------------------------------------------------------------------------------------------------------------------------------------------------------------------------------------------------------------------------------------------------------------------------------------------------------------------------------------------------------------------------------------------------------------------------------------------------------------------------------------------------------------------------------------------------------------------------------------------------------------------------------------------------------------------------------------------------------------------------------------------------------------------------------------------------------------------------------------------------------------------------------------------------------------------------------------------------------------------------------------------------------------------------------------------------------------------------------------------------------------------------------------------------------------------------------------------------------------------------------------------------------------------------------------------------------------------------------------------------------------------------------------------------------------------------------------------------------------------------------------------------------------------------------------------------------------------------------------------------------------------------------------------------------------------------------------------------------------------------------------------------------------------------------------------------------------------------------------------------------------------------------------------------------------------------------------------------------------------------------------------------------------------------------------------------------------------------------------------------------------------------------------------------------------------------------------------------------------------------------------------------------------------------------------------------------------------------------------------------------------------------------------------------------------------------------------------------------------------|
| Glycosaminoglycan biosynthesis keratan sulfate | map00533 | 1 | ec:2.4.99.4<br>alpha2,3sialyltransferase | 10 | Sample6_Locus_1667_Transcript_21/40_Confidence_0.198_Length_1348, Sample6_Locus_6485_Transcript_12/18_Confidence_0.490_Length_1417, Sample6_Locus_22436_Transcript_2/2_Confidence_0.333_Length_1831, Sample3_Locus_191_Transcript_86/118_Confidence_0.018_Length_2298, Sample3_Locus_19889_Transcript_1/1_Confidence_0.000_Length_1128, SampleTS2_Locus_4156_Transcript_29/43_Confidence_0.097_Length_1215, SampleTS1_Locus_10921_Transcript_5/7_Confidence_0.444_Length_843, Sample6_Locus_28634_Transcript_1/2_Confidence_0.333_Length_832, SampleTS1_Locus_13929_Transcript_3/7_Confidence_0.091_Length_1486, SampleTS1_Locus_6551_Transcript_6/13_Confidence_0.111_Length_1643                                                                                                                                                                                                                                                                                                                                                                                                                                                                                                                                                                                                                                                                                                                                                                                                                                                                                                                                                                                                                                                                                                                                                                                                                                                                                                                                                                                                                                                                                                                                                                                                                                                                                                                                                                                                                                                                                                                                                                                                                                                                                                                                                                                                                                                                                                                                                                                                                                               |
| Th1 and Th2 cell differentiation               | map04658 | 1 | ec:3.1.3.16<br>phosphatase               | 49 | SampleTS3_Locus_1236_Transcript_8/14_Confidence_0.379_Length_696, SampleTS1_Locus_5854_Transcript_5/5_Confidence_0.400_Length_861, Sample3_Locus_4609_Transcript_5/8_Confidence_0.444_Length_1430, SampleTS3_Locus_1630_Transcript_4/8_Confidence_0.500_Length_1635, SampleTS2_Locus_4720_Transcript_3/7_Confidence_0.667_Length_1404, Sample3_Locus_5932_Transcript_3/4_Confidence_0.571_Length_501, SampleTS3_Locus_13512_Transcript_1/3_Confidence_0.333_Length_1321, SampleTS2_Locus_1774_Transcript_4/5_Confidence_0.500_Length_990, SampleTS2_Locus_549_Transcript_10/36_Confidence_0.207_Length_1084, Sample3_Locus_14090_Transcript_2/4_Confidence_0.714_Length_1345, Sample6_Locus_5727_Transcript_3/3_Confidence_0.000_Length_2301, SampleTS3_Locus_5284_Transcript_10/12_Confidence_0.450_Length_1002, Sample3_Locus_3056_Transcript_6/6_Confidence_0.000_Length_1859, Sample3_Locus_13102_Transcript_1/2_Confidence_0.333_Length_1552, Sample1_Locus_1599_Transcript_1/1_Confidence_0.000_Length_563, SampleTS3_Locus_9298_Transcript_1/10_Confidence_0.238_Length_793, SampleTS1_Locus_2823_Transcript_2/10_Confidence_0.444_Length_2044, Sample6_Locus_4221_Transcript_5/15_Confidence_0.231_Length_1620, Sample1_Locus_9346_Transcript_2/6_Confidence_0.500_Length_949, Sample3_Locus_23182_Transcript_4/4_Confidence_0.000_Length_3946, SampleTS2_Locus_4899_Transcript_2/5_Confidence_0.357_Length_658, Sample6_Locus_594_Transcript_17/21_Confidence_0.471_Length_4353, SampleTS1_Locus_4566_Transcript_4/4_Confidence_0.000_Length_2764, SampleTS2_Locus_2599_Transcript_3/9_Confidence_0.091_Length_4008, SampleTS1_Locus_397_Transcript_66/78_Confidence_0.022_Length_711, Sample1_Locus_9441_Transcript_1/3_Confidence_0.333_Length_1512, SampleTS1_Locus_26651_Transcript_1/1_Confidence_0.000_Length_1107, SampleTS2_Locus_549_Transcript_23/36_Confidence_0.110_Length_766, Sample3_Locus_5257_Transcript_3/8_Confidence_0.333_Length_2904, Sample6_Locus_11565_Transcript_7/13_Confidence_0.097_Length_1502, Sample1_Locus_27168_Transcript_1/2_Confidence_1.000_Length_653, Sample6_Locus_24750_Transcript_4/9_Confidence_0.222_Length_785, SampleTS2_Locus_2994_Transcript_7/9_Confidence_0.235_Length_2922, Sample3_Locus_2926_Transcript_2/3_Confidence_0.750_Length_1774, SampleTS3_Locus_23494_Transcript_1/1_Confidence_0.000_Length_1156, Sample3_Locus_23102_Transcript_1/2_Confidence_0.667_Length_1067, Sample6_Locus_8346_Transcript_7/13_Confidence_0.118_Length_1292, SampleTS1_Locus_12977_Transcript_4/6_Confidence_0.429_Length_1160, SampleTS1_Locus_6027_Transcript_7/14_Confidence_0.160_Length_504, Sample3_Locus_22654_Transcript_1/1_Confidence_0.000_Length_1356, Sample6_Locus_1159_Transcript_30/32_Confidence_0.027_Length_1920, SampleTS3_Locus_2277_Transcript_3/5_Confidence_0.400_Length_1847, SampleTS1_Locus_30500_Transcript_2/2_Confidence_0.850_Length_548, Sample6_Locus_30120_Transcript_2/3_Confidence_0.667_Length_1321, SampleTS2_Locus_3992_Transcript_15/16_Confidence_0.143_Length_1808, SampleTS1_Locus_11573_Transcript_5/10_Confidence_0.211_Length_111 |

|                                          |          |   |                                                 |   |                                                                                                                                                                                                                |
|------------------------------------------|----------|---|-------------------------------------------------|---|----------------------------------------------------------------------------------------------------------------------------------------------------------------------------------------------------------------|
|                                          |          |   |                                                 |   | 7,<br>Sample1_Locus_25057_Transcript_2/6_Confidence_0.727_Length_1459,<br>SampleTS2_Locus_549_Transcript_22/36_Confidence_0.134_Length_768,<br>Sample1_Locus_13613_Transcript_6/7_Confidence_0.111_Length_1026 |
| <b>betaLactam resistance</b>             | map01501 | 1 | ec:3.5.2.6 penicillinase                        | 1 | SampleTS3_Locus_23179_Transcript_2/6_Confidence_0.500_Length_1144                                                                                                                                              |
| <b>Dioxin degradation</b>                | map00621 | 1 | ec:1.2.1.10 dehydrogenase (acetylating)         | 2 | SampleTS3_Locus_400_Transcript_6/29_Confidence_0.422_Length_2479,<br>Sample6_Locus_1524_Transcript_26/30_Confidence_0.185_Length_3215                                                                          |
| <b>Primary bile acid biosynthesis</b>    | map00120 | 1 | ec:1.1.1.35 dehydrogenase                       | 3 | SampleTS1_Locus_789_Transcript_9/11_Confidence_0.238_Length_2300,<br>SampleTS3_Locus_1827_Transcript_3/3_Confidence_0.000_Length_1033,<br>SampleTS3_Locus_11808_Transcript_9/11_Confidence_0.565_Length_1006   |
| <b>Glycosamino glycan degradation</b>    | map00531 | 1 | ec:3.2.1.23 lactase (ambiguous)                 | 1 | SampleTS2_Locus_9286_Transcript_1/1_Confidence_0.000_Length_2119                                                                                                                                               |
| <b>Peptidoglycan biosynthesis</b>        | map00550 | 1 | ec:2.4.1.227 betaNacetylglucosaminyltransferase | 1 | Sample1_Locus_1062_Transcript_3/5_Confidence_0.286_Length_1312                                                                                                                                                 |
| <b>Mannose type Oglycan biosynthesis</b> | map00515 | 1 | ec:2.4.1.109 mannosyltransferase                | 1 | Sample6_Locus_2970_Transcript_1/3_Confidence_0.600_Length_1024                                                                                                                                                 |
| <b>Benzoxazinoid biosynthesis</b>        | map00402 | 1 | ec:4.1.2.8 lyase                                | 2 | SampleTS3_Locus_9447_Transcript_3/3_Confidence_0.000_Length_886,<br>SampleTS1_Locus_10894_Transcript_1/1_Confidence_0.000_Length_652                                                                           |

|                                                               |          |   |                                              |   |                                                                                                                                                                                                                                                                                                                                          |
|---------------------------------------------------------------|----------|---|----------------------------------------------|---|------------------------------------------------------------------------------------------------------------------------------------------------------------------------------------------------------------------------------------------------------------------------------------------------------------------------------------------|
| <b>Glycosylphosphatidylinositol (GPI) anchor biosynthesis</b> | map00563 | 1 | ec:2.4.1.198 N-acetylglucosaminyltransferase | 1 | Sample6_Locus_10518_Transcript_12/15_Confidence_0.059_Length_418                                                                                                                                                                                                                                                                         |
| <b>Synthesis and degradation of ketone bodies</b>             | map00072 | 1 | ec:1.3.1.9 Cactyltransferase                 | 1 | SampleTS2_Locus_1750_Transcript_17/20_Confidence_0.182_Length_1568                                                                                                                                                                                                                                                                       |
| <b>Carotenoid biosynthesis</b>                                | map00906 | 1 | ec:1.13.11.51 dioxygenase                    | 1 | SampleTS1_Locus_8076_Transcript_4/6_Confidence_0.190_Length_1521                                                                                                                                                                                                                                                                         |
| <b>Phenazine biosynthesis</b>                                 | map00405 | 1 | ec:4.1.3.27 synthase                         | 1 | Sample1_Locus_5305_Transcript_3/12_Confidence_0.143_Length_2221                                                                                                                                                                                                                                                                          |
| <b>Penicillin and cephalosporin biosynthesis</b>              | map00311 | 1 | ec:3.5.2.6 penicillinase                     | 1 | SampleTS3_Locus_23179_Transcript_2/6_Confidence_0.500_Length_1144                                                                                                                                                                                                                                                                        |
| <b>Ethylbenzene degradation</b>                               | map00642 | 1 | ec:2.3.1.16 Cacyltransferase                 | 1 | SampleTS2_Locus_1750_Transcript_17/20_Confidence_0.182_Length_1568                                                                                                                                                                                                                                                                       |
| <b>Aflatoxin biosynthesis</b>                                 | map00254 | 1 | ec:6.4.1.2 carboxylase                       | 2 | Sample3_Locus_8920_Transcript_2/3_Confidence_0.333_Length_2038, SampleTS1_Locus_1155_Transcript_11/16_Confidence_0.625_Length_2240                                                                                                                                                                                                       |
| <b>Xylene degradation</b>                                     | map00622 | 1 | ec:1.2.1.10 dehydrogenase (acetylating)      | 2 | SampleTS3_Locus_400_Transcript_6/29_Confidence_0.422_Length_2479, Sample6_Locus_1524_Transcript_26/30_Confidence_0.185_Length_3215                                                                                                                                                                                                       |
| <b>Naphthalene degradation</b>                                | map00626 | 1 | ec:1.1.1.1 dehydrogenase                     | 5 | SampleTS2_Locus_4874_Transcript_6/12_Confidence_0.158_Length_1042, Sample6_Locus_1524_Transcript_26/30_Confidence_0.185_Length_3215, SampleTS2_Locus_263_Transcript_1/3_Confidence_0.250_Length_2184, SampleTS3_Locus_400_Transcript_6/29_Confidence_0.422_Length_2479, SampleTS3_Locus_23264_Transcript_1/3_Confidence_0.500_Length_845 |
| <b>Biosynthesis of 12, 14 and 16 membered macrolides</b>      | map00522 | 1 | ec:2.3.1.94 synthase                         | 2 | Sample3_Locus_4157_Transcript_2/4_Confidence_0.333_Length_2315, Sample6_Locus_8953_Transcript_13/14_Confidence_0.143_Length_4871                                                                                                                                                                                                         |
| <b>Diterpenoid biosynthesis</b>                               | map00904 | 1 | ec:1.14.11.13 2betadioxygenase               | 1 | Sample6_Locus_445_Transcript_22/46_Confidence_0.251_Length_1324                                                                                                                                                                                                                                                                          |
| <b>DGlutamine and Dglutamate metabolism</b>                   | map00471 | 1 | ec:3.5.1.2 glutaminase I                     | 2 | Sample6_Locus_3307_Transcript_18/23_Confidence_0.163_Length_735, SampleTS1_Locus_5169_Transcript_10/19_Confidence_0.593_Length_3162                                                                                                                                                                                                      |
| <b>Glucosinolate biosynthesis</b>                             | map00966 | 1 | ec:2.6.1.42 transaminase                     | 2 | Sample1_Locus_18777_Transcript_2/4_Confidence_0.923_Length_1416, Sample3_Locus_5952_Transcript_4/4_Confidence_0.000_Length_2586                                                                                                                                                                                                          |
| <b>Biosynthesis of ansamycins</b>                             | map01051 | 1 | ec:2.2.1.1 glycolaldehydetransferase         | 1 | SampleTS1_Locus_16129_Transcript_1/1_Confidence_0.000_Length_1960                                                                                                                                                                                                                                                                        |



**Table S5.** DEG id, log2 Fold Change, adjusted P value (padj), sequence description and enzyme codes ( $|\text{LogFC}| > 2$ ,  $\text{padj} \leq 0.01$ ).

| id                                                                 | log2FoldChange | padj        | NCBI_NR db description                             |
|--------------------------------------------------------------------|----------------|-------------|----------------------------------------------------|
| Sample3_Locus_20852_Transcript_1/3_Confidence_1.000_Length_655     | 11,00058027    | 3,54E-56    | ---NA---                                           |
| SampleTS1_Locus_12838_Transcript_3/6_Confidence_0.692_Length_1084  | 9,272699262    | 6,12E-05    | ---NA---                                           |
| Sample3_Locus_8235_Transcript_1/4_Confidence_0.750_Length_1411     | 9,038398808    | 4,64E-40    | ---NA---                                           |
| SampleTS1_Locus_5177_Transcript_12/12_Confidence_0.410_Length_2433 | 8,167685601    | 1,66E-60    | protein                                            |
| Sample1_Locus_24293_Transcript_7/7_Confidence_0.000_Length_1198    | 7,575327956    | 4,79E-12    | hypothetical protein<br>COCSUDRAFT_66438           |
| SampleTS3_Locus_11672_Transcript_5/5_Confidence_0.417_Length_1173  | 7,420877852    | 3,54E-13    | ---NA---                                           |
| SampleTS2_Locus_1842_Transcript_1/10_Confidence_0.533_Length_1424  | 7,034106596    | 3,68E-28    | ---NA---                                           |
| SampleTS3_Locus_1202_Transcript_5/26_Confidence_0.033_Length_352   | 6,845761329    | 1,84E-08    | ---NA---                                           |
| SampleTS1_Locus_23003_Transcript_3/9_Confidence_0.094_Length_3741  | 6,844101128    | 4,32E-64    | extracellular ligand-binding<br>receptor           |
| Sample1_Locus_7779_Transcript_5/5_Confidence_0.125_Length_980      | 6,514125389    | 1,90E-82    | ---NA---                                           |
| Sample3_Locus_17655_Transcript_7/11_Confidence_0.459_Length_815    | 6,439711887    | 4,73E-181   | abc transporter substrate-binding<br>protein       |
| Sample3_Locus_6_Transcript_2/29_Confidence_0.022_Length_2158       | 6,231044617    | 3,72E-15    | elmo domain-containing protein<br>3-like           |
| SampleTS2_Locus_3108_Transcript_9/19_Confidence_0.060_Length_1587  | 6,185250239    | 3,30E-05    | 3'5'-cyclic nucleotide<br>phosphodiesterase        |
| SampleTS3_Locus_4789_Transcript_2/8_Confidence_0.586_Length_584    | 6,161787176    | 0,000103912 | ---NA---                                           |
| SampleTS3_Locus_1064_Transcript_8/31_Confidence_0.339_Length_1913  | 6,038403818    | 3,19E-09    | ---NA---                                           |
| Sample1_Locus_4643_Transcript_15/21_Confidence_0.197_Length_332    | 5,750682616    | 5,29E-06    | ---NA---                                           |
| Sample3_Locus_14002_Transcript_1/1_Confidence_0.000_Length_1044    | 5,724777188    | 8,40E-51    | rna recognition motif containing<br>family protein |
| Sample6_Locus_15296_Transcript_1/1_Confidence_0.000_Length_1123    | 5,722904742    | 0,001226458 | ---NA---                                           |
| SampleTS1_Locus_354_Transcript_3/28_Confidence_0.108_Length_974    | 5,685002112    | 1,08E-05    | ---NA---                                           |

|                                                                    |             |             |                                                     |
|--------------------------------------------------------------------|-------------|-------------|-----------------------------------------------------|
| Sample1_Locus_5497_Transcript_3/3_Confidence_0.000_Length_1552     | 5,676357369 | 0,000206657 | ---NA---                                            |
| Sample1_Locus_795_Transcript_3/5_Confidence_0.500_Length_1893      | 5,423680459 | 1,75E-18    | protein phosphatase 2c family protein               |
| Sample6_Locus_9744_Transcript_1/1_Confidence_0.000_Length_1559     | 5,374003405 | 4,63E-08    | camk camk1 protein kinase                           |
| SampleTS1_Locus_473_Transcript_15/18_Confidence_0.053_Length_496   | 5,368551796 | 4,16E-06    | ---NA---                                            |
| SampleTS3_Locus_1274_Transcript_12/77_Confidence_0.082_Length_1404 | 5,253418477 | 6,29E-05    | ---NA---                                            |
| SampleTS1_Locus_388_Transcript_6/6_Confidence_0.111_Length_1488    | 5,224590955 | 1,02E-15    | phosphoenolpyruvate carboxylase kinase              |
| Sample6_Locus_3042_Transcript_1/1_Confidence_0.000_Length_1466     | 5,185237355 | 6,65E-07    | ---NA---                                            |
| SampleTS1_Locus_15981_Transcript_1/1_Confidence_0.000_Length_1004  | 5,101393609 | 1,74E-08    | ---NA---                                            |
| Sample3_Locus_4004_Transcript_7/9_Confidence_0.400_Length_2113     | 4,98520081  | 3,76E-92    | family 3 adenylate cyclase                          |
| Sample1_Locus_402_Transcript_15/20_Confidence_0.122_Length_761     | 4,930155696 | 5,29E-210   | ---NA---                                            |
| SampleTS1_Locus_18205_Transcript_5/6_Confidence_0.200_Length_1443  | 4,874903924 | 0,001287728 | ---NA---                                            |
| Sample3_Locus_6151_Transcript_16/22_Confidence_0.102_Length_1626   | 4,874014209 | 0           | squamosa promoter-binding-like protein 7 isoform x2 |
| Sample6_Locus_4919_Transcript_1/4_Confidence_0.429_Length_528      | 4,807787641 | 0,000769722 | ---NA---                                            |
| SampleTS2_Locus_4557_Transcript_3/5_Confidence_0.500_Length_885    | 4,800900533 | 0,007191059 | ---NA---                                            |
| Sample6_Locus_7983_Transcript_4/5_Confidence_0.654_Length_702      | 4,752754199 | 1,26E-42    | ---NA---                                            |
| SampleTS2_Locus_1815_Transcript_7/9_Confidence_0.462_Length_603    | 4,745615926 | 3,25E-05    | domon domain containing protein                     |
| Sample1_Locus_8729_Transcript_1/3_Confidence_0.714_Length_626      | 4,69530485  | 2,87E-181   | ---NA---                                            |
| SampleTS1_Locus_10104_Transcript_2/4_Confidence_0.500_Length_1246  | 4,690470804 | 4,17E-10    | ---NA---                                            |
| SampleTS2_Locus_507_Transcript_73/128_Confidence_0.005_Length_410  | 4,609547522 | 1,18E-43    | ---NA---                                            |
| SampleTS2_Locus_1041_Transcript_6/9_Confidence_0.091_Length_927    | 4,552978065 | 0,000825272 | ---NA---                                            |
| Sample3_Locus_61_Transcript_3/13_Confidence_0.000_Length_1058      | 4,552973485 | 5,29E-06    | ---NA---                                            |
| Sample3_Locus_6097_Transcript_2/4_Confidence_0.500_Length_1588     | 4,552961366 | 0,008754617 | protein                                             |
| SampleTS1_Locus_3282_Transcript_21/28_Confidence_0.206_Length_1494 | 4,523237383 | 6,03E-42    | serine threonine-protein kinase atr-like            |

|                                                                    |             |             |                                           |
|--------------------------------------------------------------------|-------------|-------------|-------------------------------------------|
| SampleTS1_Locus_86_Transcript_74/166_Confidence_0.033_Length_1152  | 4,485243868 | 2,07E-77    | abc transporter substrate-binding protein |
| SampleTS3_Locus_1222_Transcript_6/17_Confidence_0.231_Length_654   | 4,457100747 | 0,000113333 | ---NA---                                  |
| SampleTS3_Locus_247_Transcript_66/83_Confidence_0.046_Length_451   | 4,454910632 | 0,001473552 | ---NA---                                  |
| Sample3_Locus_12405_Transcript_3/6_Confidence_0.333_Length_1010    | 4,429346806 | 0,00E+00    | ---NA---                                  |
| SampleTS1_Locus_5902_Transcript_6/10_Confidence_0.467_Length_700   | 4,418672122 | 0,003194545 | ---NA---                                  |
| SampleTS2_Locus_2823_Transcript_10/10_Confidence_0.405_Length_406  | 4,37907043  | 3,83E-10    | ---NA---                                  |
| SampleTS1_Locus_9838_Transcript_6/9_Confidence_0.444_Length_1154   | 4,323308294 | 1,39E-86    | ---NA---                                  |
| Sample6_Locus_4680_Transcript_3/4_Confidence_0.200_Length_733      | 4,304282891 | 3,01E-05    | ---NA---                                  |
| SampleTS2_Locus_7300_Transcript_3/4_Confidence_0.368_Length_958    | 4,288937983 | 1,60E-25    | ---NA---                                  |
| SampleTS1_Locus_5159_Transcript_10/13_Confidence_0.378_Length_1753 | 4,269170702 | 4,92E-07    | f-box Irr-repeat protein 17               |
| SampleTS3_Locus_976_Transcript_24/26_Confidence_0.657_Length_846   | 4,264471315 | 0,00022215  | ---NA---                                  |
| SampleTS3_Locus_3474_Transcript_2/7_Confidence_0.429_Length_450    | 4,238536205 | 0,004028801 | ---NA---                                  |
| SampleTS3_Locus_6276_Transcript_4/6_Confidence_0.409_Length_852    | 4,23449739  | 0,000107383 | ---NA---                                  |
| Sample1_Locus_24078_Transcript_6/7_Confidence_0.150_Length_1572    | 4,213763115 | 0,000253496 | adenylate kinase                          |
| SampleTS2_Locus_530_Transcript_56/383_Confidence_0.013_Length_411  | 4,207261248 | 9,54E-14    | ---NA---                                  |
| Sample6_Locus_13760_Transcript_5/10_Confidence_0.500_Length_710    | 4,167980532 | 1,68E-15    | ---NA---                                  |
| Sample6_Locus_4723_Transcript_20/38_Confidence_0.053_Length_830    | 4,157757745 | 3,99E-45    | ---NA---                                  |
| Sample3_Locus_17568_Transcript_1/1_Confidence_0.000_Length_1894    | 4,137918794 | 2,19E-13    | solute carrier family 39 protein          |
| Sample1_Locus_5360_Transcript_6/10_Confidence_0.302_Length_4884    | 3,993533657 | 1,73E-05    | nadph--cytochrome p450 reductase          |
| Sample1_Locus_9671_Transcript_4/10_Confidence_0.414_Length_2545    | 3,981265506 | 8,06E-28    | importin alpha                            |

|                                                                    |             |             |                                   |
|--------------------------------------------------------------------|-------------|-------------|-----------------------------------|
| SampleTS1_Locus_3421_Transcript_7/10_Confidence_0.383_Length_971   | 3,968010106 | 0,005762551 | ring finger protein 185           |
| SampleTS3_Locus_609_Transcript_21/29_Confidence_0.484_Length_1719  | 3,948448823 | 3,67E-35    | myb-like dna-binding partial      |
| SampleTS2_Locus_3140_Transcript_18/19_Confidence_0.323_Length_745  | 3,947250341 | 3,81E-13    | acylpyruvase mitochondrial-like   |
| Sample3_Locus_5077_Transcript_25/32_Confidence_0.104_Length_1090   | 3,94069838  | 1,38E-06    | squamosa promoter binding protein |
| SampleTS1_Locus_676_Transcript_1/12_Confidence_0.138_Length_1355   | 3,900888479 | 2,24E-07    | ---NA---                          |
| Sample1_Locus_1934_Transcript_5/10_Confidence_0.467_Length_1095    | 3,898467813 | 0,001875472 | protein                           |
| SampleTS3_Locus_1786_Transcript_19/20_Confidence_0.344_Length_522  | 3,892102289 | 6,89E-13    | ---NA---                          |
| Sample1_Locus_12346_Transcript_7/13_Confidence_0.105_Length_1680   | 3,889242287 | 2,49E-10    | ---NA---                          |
| Sample1_Locus_8365_Transcript_1/1_Confidence_0.000_Length_1005     | 3,855520931 | 0,008311582 | ---NA---                          |
| SampleTS1_Locus_2950_Transcript_5/8_Confidence_0.211_Length_995    | 3,845756354 | 0,006967243 | ---NA---                          |
| SampleTS3_Locus_8258_Transcript_4/7_Confidence_0.500_Length_1732   | 3,839841491 | 0,001580641 | adp-ribosylation factor           |
| SampleTS1_Locus_86_Transcript_39/166_Confidence_0.018_Length_398   | 3,820443392 | 7,84E-26    | ---NA---                          |
| SampleTS2_Locus_195_Transcript_54/71_Confidence_0.121_Length_1499  | 3,816008864 | 0,001898467 | squamosa promoter binding protein |
| SampleTS2_Locus_8381_Transcript_4/6_Confidence_0.562_Length_1179   | 3,815990442 | 0,000454609 | ---NA---                          |
| SampleTS1_Locus_8647_Transcript_11/12_Confidence_0.267_Length_817  | 3,76028625  | 2,15E-12    | hypothetical protein              |
| SampleTS1_Locus_2668_Transcript_1/1_Confidence_0.333_Length_615    | 3,736274682 | 4,01E-16    | heat shock protein hsp20          |
| SampleTS2_Locus_695_Transcript_28/28_Confidence_0.108_Length_683   | 3,700921599 | 1,18E-12    | protein                           |
| SampleTS3_Locus_11_Transcript_354/519_Confidence_0.023_Length_1120 | 3,692519031 | 1,72E-08    | ---NA---                          |
| Sample1_Locus_6199_Transcript_3/7_Confidence_0.588_Length_1175     | 3,623361809 | 0,002045693 | nuclear ribonuclease z            |
| SampleTS3_Locus_1176_Transcript_9/16_Confidence_0.101_Length_1170  | 3,598160952 | 0,001572143 | gag-pol polyprotein               |

|                                                                    |             |             |                                                                                 |
|--------------------------------------------------------------------|-------------|-------------|---------------------------------------------------------------------------------|
| SampleTS2_Locus_195_Transcript_16/71_Confidence_0.058_Length_700   | 3,58859196  | 3,98E-06    | ---NA---                                                                        |
| Sample6_Locus_4545_Transcript_7/7_Confidence_0.125_Length_429      | 3,569359151 | 3,00E-42    | ---NA---                                                                        |
| SampleTS2_Locus_703_Transcript_26/30_Confidence_0.190_Length_791   | 3,533919861 | 2,84E-23    | secreted protein                                                                |
| SampleTS2_Locus_1685_Transcript_8/23_Confidence_0.133_Length_874   | 3,504058254 | 1,48E-06    | ---NA---                                                                        |
| SampleTS2_Locus_195_Transcript_55/71_Confidence_0.194_Length_1091  | 3,497820011 | 0,005095588 | squamosa promoter binding protein                                               |
| SampleTS3_Locus_877_Transcript_5/9_Confidence_0.174_Length_661     | 3,487927071 | 9,84E-45    | ---NA---                                                                        |
| SampleTS2_Locus_9696_Transcript_3/6_Confidence_0.200_Length_356    | 3,468852287 | 0,001285682 | ---NA---                                                                        |
| Sample6_Locus_5040_Transcript_19/19_Confidence_0.048_Length_789    | 3,427644893 | 4,37E-93    | secreted protein                                                                |
| SampleTS1_Locus_1262_Transcript_78/105_Confidence_0.012_Length_939 | 3,390468749 | 1,04E-10    | ---NA---                                                                        |
| SampleTS3_Locus_11902_Transcript_9/10_Confidence_0.032_Length_770  | 3,37626144  | 6,33E-103   | ---NA---                                                                        |
| Sample6_Locus_15577_Transcript_4/6_Confidence_0.364_Length_1541    | 3,272070898 | 0,002568998 | ---NA---                                                                        |
| Sample6_Locus_18094_Transcript_4/6_Confidence_0.357_Length_1047    | 3,211932069 | 2,59E-06    | ---NA---                                                                        |
| SampleTS1_Locus_3020_Transcript_3/12_Confidence_0.452_Length_526   | 3,183212706 | 3,03E-07    | ---NA---                                                                        |
| SampleTS2_Locus_2631_Transcript_10/37_Confidence_0.203_Length_869  | 3,180996262 | 5,12E-15    | protein farnesyltransferase geranylgeranyltransferase type-1 subunit alpha-like |
| SampleTS1_Locus_6680_Transcript_1/4_Confidence_0.667_Length_691    | 3,178578125 | 1,72E-06    | ---NA---                                                                        |
| SampleTS3_Locus_3474_Transcript_3/7_Confidence_0.714_Length_1365   | 3,178564289 | 0,000119025 | cysteine hydrolase                                                              |
| Sample3_Locus_5321_Transcript_3/12_Confidence_0.381_Length_1101    | 3,163350325 | 1,21E-07    | homospermidine synthase                                                         |
| Sample1_Locus_2553_Transcript_8/8_Confidence_0.474_Length_1256     | 3,148578868 | 0,003985246 | ---NA---                                                                        |
| Sample1_Locus_2130_Transcript_13/15_Confidence_0.148_Length_731    | 3,141258685 | 1,66E-23    | hypothetical protein CHLNCDRAFT_53756                                           |
| SampleTS1_Locus_6044_Transcript_1/2_Confidence_0.333_Length_684    | 3,121804693 | 0,000972559 | ---NA---                                                                        |

|                                                                     |             |             |                                                        |
|---------------------------------------------------------------------|-------------|-------------|--------------------------------------------------------|
| SampleTS2_Locus_1645_Transcript_3/6_Confidence_0.583_Length_935     | 3,093524336 | 0,001561769 | ---NA---                                               |
| SampleTS3_Locus_10254_Transcript_7/14_Confidence_0.227_Length_477   | 3,083475104 | 2,67E-05    | ---NA---                                               |
| Sample3_Locus_18643_Transcript_2/4_Confidence_0.200_Length_574      | 3,083472591 | 0,005577185 | ---NA---                                               |
| Sample6_Locus_57_Transcript_17/25_Confidence_0.207_Length_851       | 3,072336584 | 0,001011434 | ---NA---                                               |
| Sample1_Locus_28735_Transcript_4/4_Confidence_0.000_Length_825      | 3,069755266 | 0,008894724 | hypothetical protein<br>COCSUDRAFT_20202               |
| SampleTS1_Locus_1262_Transcript_86/105_Confidence_0.017_Length_3863 | 3,067883509 | 3,18E-19    | protein                                                |
| Sample1_Locus_3814_Transcript_1/13_Confidence_0.097_Length_852      | 3,057547642 | 4,55E-59    | ---NA---                                               |
| SampleTS1_Locus_5495_Transcript_4/19_Confidence_0.208_Length_655    | 3,053038209 | 0,000359872 | ---NA---                                               |
| SampleTS2_Locus_2228_Transcript_13/14_Confidence_0.486_Length_2575  | 3,045359162 | 7,81E-14    | protein                                                |
| Sample6_Locus_4581_Transcript_15/18_Confidence_0.479_Length_1534    | 3,038393915 | 0,008905321 | fas1 domain-containing protein                         |
| Sample1_Locus_6002_Transcript_28/30_Confidence_0.082_Length_1834    | 3,03408767  | 8,37E-76    | 14<br>mitogen-activated protein kinase                 |
| Sample3_Locus_6713_Transcript_13/16_Confidence_0.526_Length_1612    | 3,021812066 | 6,87E-09    | ash1-related protein isoform 1                         |
| Sample3_Locus_14476_Transcript_2/6_Confidence_0.688_Length_618      | 3,01653083  | 3,43E-05    | ---NA---                                               |
| SampleTS2_Locus_7428_Transcript_8/11_Confidence_0.720_Length_720    | 3,015315157 | 7,16E-05    | ---NA---                                               |
| SampleTS1_Locus_516_Transcript_35/37_Confidence_0.055_Length_1497   | 2,989306495 | 1,55E-130   | ---NA---                                               |
| SampleTS3_Locus_13701_Transcript_3/3_Confidence_0.000_Length_845    | 2,985918215 | 0,000231094 | ---NA---                                               |
| Sample1_Locus_1446_Transcript_8/28_Confidence_0.128_Length_416      | 2,977132471 | 3,05E-56    | ---NA---                                               |
| Sample3_Locus_14059_Transcript_4/5_Confidence_0.538_Length_512      | 2,974863166 | 2,29E-13    | ---NA---                                               |
| Sample3_Locus_633_Transcript_2/5_Confidence_0.400_Length_2278       | 2,955934096 | 0,000114635 | histidine partial                                      |
| SampleTS3_Locus_7941_Transcript_13/15_Confidence_0.387_Length_1160  | 2,89602593  | 1,61E-55    | ---NA---                                               |
| SampleTS2_Locus_8890_Transcript_3/7_Confidence_0.200_Length_515     | 2,878736504 | 0,001045399 | ---NA---                                               |
| SampleTS3_Locus_3853_Transcript_12/20_Confidence_0.564_Length_838   | 2,842964108 | 2,19E-09    | phosphate abc transporter<br>substrate-binding protein |

|                                                                    |             |             |                                                                            |
|--------------------------------------------------------------------|-------------|-------------|----------------------------------------------------------------------------|
| SampleTS2_Locus_3898_Transcript_4/10_Confidence_0.292_Length_604   | 2,834733281 | 0,001483127 | ---NA---                                                                   |
| Sample1_Locus_15530_Transcript_1/3_Confidence_0.333_Length_758     | 2,834379068 | 0,003885652 | ---NA---                                                                   |
| SampleTS1_Locus_610_Transcript_52/54_Confidence_0.210_Length_1630  | 2,81778096  | 6,25E-12    | protein farnesyltransferase geranylgeranyltransferase type-1 subunit alpha |
| SampleTS2_Locus_1897_Transcript_7/15_Confidence_0.260_Length_342   | 2,803970215 | 9,42E-36    | ---NA---                                                                   |
| SampleTS1_Locus_12878_Transcript_5/5_Confidence_0.500_Length_1044  | 2,785632444 | 0,001478727 | ---NA---                                                                   |
| SampleTS1_Locus_8506_Transcript_4/14_Confidence_0.133_Length_1659  | 2,785621541 | 0,000207062 | surface antigen protein                                                    |
| Sample1_Locus_9621_Transcript_9/12_Confidence_0.737_Length_852     | 2,782449619 | 8,82E-06    | conserved unknown protein                                                  |
| Sample3_Locus_562_Transcript_4/6_Confidence_0.200_Length_1219      | 2,767092725 | 0,000127957 | serine decarboxylase                                                       |
| SampleTS3_Locus_4287_Transcript_13/14_Confidence_0.511_Length_695  | 2,761202375 | 8,42E-19    | protein                                                                    |
| Sample6_Locus_6229_Transcript_18/18_Confidence_0.000_Length_333    | 2,756532442 | 1,95E-05    | ---NA---                                                                   |
| Sample3_Locus_8866_Transcript_2/4_Confidence_0.714_Length_1157     | 2,741990348 | 0,001796286 | phosphoribosylformylglycinamide cyclo- chloroplastical mitochondrial-like  |
| SampleTS3_Locus_6772_Transcript_12/17_Confidence_0.238_Length_1568 | 2,740894093 | 0,000194914 | ammonium transporter                                                       |
| SampleTS1_Locus_516_Transcript_31/37_Confidence_0.047_Length_1839  | 2,738516854 | 1,37E-08    | hypothetical protein<br>THAOC_06802                                        |
| SampleTS2_Locus_4531_Transcript_10/17_Confidence_0.583_Length_2220 | 2,716468863 | 0,003916901 | protein phosphatase 2c family protein                                      |
| SampleTS1_Locus_23448_Transcript_1/1_Confidence_0.000_Length_1309  | 2,709084072 | 0,000419326 | ---NA---                                                                   |
| Sample1_Locus_220_Transcript_22/33_Confidence_0.024_Length_646     | 2,661675765 | 0,00038967  | ---NA---                                                                   |
| SampleTS3_Locus_1202_Transcript_26/26_Confidence_0.120_Length_1120 | 2,646073802 | 0,000781183 | hypothetical protein                                                       |
| Sample6_Locus_25087_Transcript_4/5_Confidence_0.025_Length_1072    | 2,635431594 | 0,001220222 | ---NA---                                                                   |
| SampleTS1_Locus_9225_Transcript_1/6_Confidence_0.111_Length_948    | 2,627392983 | 0,00019496  | ---NA---                                                                   |
| Sample1_Locus_2443_Transcript_1/6_Confidence_0.400_Length_603      | 2,612464169 | 0,002038857 | probable histone h2a variant 3                                             |

|                                                                     |             |             |                                                     |
|---------------------------------------------------------------------|-------------|-------------|-----------------------------------------------------|
| SampleTS3_Locus_331_Transcript_2/14_Confidence_0.077_Length_1738    | 2,591674326 | 5,75E-24    | protein                                             |
| SampleTS1_Locus_443_Transcript_19/20_Confidence_0.091_Length_2874   | 2,590468312 | 2,53E-42    | gram domain-containing protein 1c-like isoform x3   |
| Sample1_Locus_3_Transcript_74/103_Confidence_0.006_Length_500       | 2,568757697 | 2,51E-27    | ---NA---                                            |
| SampleTS3_Locus_137_Transcript_34/48_Confidence_0.006_Length_1072   | 2,517720051 | 1,01E-07    | probable anion transporter 5                        |
| SampleTS3_Locus_13896_Transcript_13/14_Confidence_0.021_Length_1036 | 2,517088207 | 1,33E-07    | ---NA---                                            |
| SampleTS3_Locus_8946_Transcript_7/8_Confidence_0.091_Length_2134    | 2,511479159 | 2,52E-14    | abc subfamily abcg                                  |
| SampleTS1_Locus_275_Transcript_59/85_Confidence_0.013_Length_590    | 2,510060978 | 7,90E-43    | dihydropyrimidinase-like isoform x1                 |
| SampleTS3_Locus_487_Transcript_25/26_Confidence_0.122_Length_1071   | 2,501129912 | 7,84E-05    | catalase peroxidase hpi                             |
| SampleTS1_Locus_6151_Transcript_8/10_Confidence_0.067_Length_1404   | 2,497085548 | 2,44E-06    | hypothetical protein VOLCADRAFT_106216              |
| SampleTS3_Locus_22036_Transcript_4/4_Confidence_0.556_Length_688    | 2,444035058 | 0,003342381 | a-macroglobulin complement component family protein |
| SampleTS1_Locus_5389_Transcript_15/21_Confidence_0.245_Length_680   | 2,436708951 | 0,00061285  | ---NA---                                            |
| SampleTS1_Locus_6263_Transcript_6/10_Confidence_0.040_Length_1038   | 2,436061691 | 1,56E-86    | sugar transport protein 13-like                     |
| Sample6_Locus_12619_Transcript_13/16_Confidence_0.133_Length_424    | 2,422122351 | 0,004952789 | ---NA---                                            |
| Sample3_Locus_1362_Transcript_18/18_Confidence_0.222_Length_1478    | 2,416147762 | 4,20E-63    | myb domain protein                                  |
| SampleTS3_Locus_148_Transcript_514/701_Confidence_0.006_Length_309  | 2,393970507 | 0,008259093 | ---NA---                                            |
| SampleTS1_Locus_920_Transcript_114/207_Confidence_0.025_Length_847  | 2,379499609 | 0,000177177 | hypothetical protein EMIHUDRAFT_357722, partial     |
| SampleTS3_Locus_5673_Transcript_4/8_Confidence_0.200_Length_1545    | 2,376243061 | 2,22E-53    | ---NA---                                            |
| Sample1_Locus_9463_Transcript_1/13_Confidence_0.500_Length_687      | 2,357477873 | 0,009969876 | ---NA---                                            |
| Sample3_Locus_4983_Transcript_5/14_Confidence_0.667_Length_804      | 2,327482771 | 6,60E-14    | ---NA---                                            |
| Sample6_Locus_16581_Transcript_8/12_Confidence_0.467_Length_2159    | 2,306730516 | 3,02E-31    | b3 domain-containing protein os07g0563300-like      |



|                                                                     |             |             |                                          |
|---------------------------------------------------------------------|-------------|-------------|------------------------------------------|
| SampleTS1_Locus_51_Transcript_16/22_Confidence_0.205_Length_763     | 2,285485095 | 0,004561129 | ---NA---                                 |
| SampleTS3_Locus_22037_Transcript_4/5_Confidence_0.500_Length_442    | 2,284319504 | 1,16E-15    | ---NA---                                 |
| SampleTS2_Locus_3486_Transcript_11/18_Confidence_0.365_Length_1202  | 2,269655938 | 6,90E-11    | ---NA---                                 |
| Sample6_Locus_585_Transcript_21/34_Confidence_0.265_Length_974      | 2,246669092 | 3,06E-48    | glycosyl transferase                     |
| Sample3_Locus_21605_Transcript_3/4_Confidence_0.250_Length_1123     | 2,244335936 | 0,005146243 | ---NA---                                 |
| SampleTS1_Locus_12050_Transcript_2/7_Confidence_0.588_Length_496    | 2,215541987 | 3,31E-09    | ---NA---                                 |
| SampleTS3_Locus_2974_Transcript_5/19_Confidence_0.108_Length_524    | 2,211975537 | 3,04E-60    | ---NA---                                 |
| Sample6_Locus_7770_Transcript_5/7_Confidence_0.688_Length_1460      | 2,203382026 | 9,05E-07    | caax prenyl protease 2                   |
| Sample3_Locus_3879_Transcript_3/17_Confidence_0.386_Length_704      | 2,197875876 | 0,004820274 | ---NA---                                 |
| Sample1_Locus_6882_Transcript_13/34_Confidence_0.095_Length_647     | 2,196511154 | 5,32E-11    | ---NA---                                 |
| SampleTS1_Locus_10121_Transcript_12/12_Confidence_0.238_Length_1237 | 2,175892875 | 0,001209132 | ---NA---                                 |
| Sample6_Locus_1809_Transcript_20/21_Confidence_0.137_Length_1913    | 2,170435802 | 5,15E-72    | squamosa promoter-binding protein 1-like |
| Sample1_Locus_7491_Transcript_4/12_Confidence_0.471_Length_824      | 2,168819956 | 3,50E-14    | ---NA---                                 |
| Sample1_Locus_8233_Transcript_10/12_Confidence_0.200_Length_942     | 2,156632758 | 5,70E-83    | rab gtpase-8                             |
| Sample3_Locus_3837_Transcript_8/10_Confidence_0.350_Length_1593     | 2,119734701 | 8,08E-70    | ---NA---                                 |
| SampleTS2_Locus_4645_Transcript_4/6_Confidence_0.650_Length_2189    | 2,097020904 | 5,11E-10    | ---NA---                                 |
| SampleTS2_Locus_390_Transcript_13/53_Confidence_0.189_Length_597    | 2,08943898  | 1,58E-13    | ---NA---                                 |
| Sample1_Locus_3216_Transcript_8/22_Confidence_0.061_Length_529      | 2,085675242 | 0,003120143 | ---NA---                                 |
| Sample3_Locus_17985_Transcript_11/11_Confidence_0.059_Length_915    | 2,081044045 | 2,88E-22    | reverse transcriptase                    |
| Sample1_Locus_4898_Transcript_9/18_Confidence_0.353_Length_1501     | 2,074501269 | 3,27E-08    | phospholipid scramblase                  |
| Sample1_Locus_820_Transcript_7/17_Confidence_0.590_Length_943       | 2,072226545 | 2,40E-15    | glutathione s-transferase                |

|                                                                  |              |             |                                                |
|------------------------------------------------------------------|--------------|-------------|------------------------------------------------|
| SampleTS1_Locus_11908_Transcript_4/6_Confidence_0.583_Length_702 | 2,058457302  | 9,05E-07    | wd-40 repeat-containing protein                |
| Sample1_Locus_9346_Transcript_2/6_Confidence_0.500_Length_949    | 2,021808088  | 0,001026853 | hypothetical protein<br>VOLCADRAFT_84366       |
| Sample1_Locus_6171_Transcript_31/32_Confidence_0.072_Length_2101 | 2,007414206  | 1,57E-51    | protein                                        |
| Sample1_Locus_10546_Transcript_2/3_Confidence_0.333_Length_2690  | 2,001354941  | 2,20E-12    | kinase domain-containing protein<br>isoform 1  |
| Sample1_Locus_510_Transcript_2/12_Confidence_0.674_Length_501    | -2,002214213 | 0,000237704 | ---NA---                                       |
| Sample3_Locus_9600_Transcript_7/7_Confidence_0.350_Length_867    | -2,010626488 | 0,005216032 | arginine n-methyltransferase 2                 |
| Sample6_Locus_6377_Transcript_8/31_Confidence_0.019_Length_975   | -2,022321333 | 1,95E-13    | ---NA---                                       |
| SampleTS3_Locus_8386_Transcript_8/10_Confidence_0.200_Length_553 | -2,035893475 | 1,37E-12    | hypothetical protein<br>COCSUDRAFT_53614       |
| Sample3_Locus_7306_Transcript_4/5_Confidence_0.625_Length_572    | -2,044460982 | 2,10E-06    | protein                                        |
| Sample3_Locus_8602_Transcript_7/9_Confidence_0.000_Length_887    | -2,04599485  | 2,28E-10    | ---NA---                                       |
| Sample3_Locus_6953_Transcript_9/13_Confidence_0.475_Length_4750  | -2,046746686 | 1,09E-05    | xylulose kinase                                |
| Sample1_Locus_8793_Transcript_5/12_Confidence_0.469_Length_1642  | -2,056542542 | 0,000939814 | ---NA---                                       |
| SampleTS1_Locus_102_Transcript_7/24_Confidence_0.073_Length_1592 | -2,064067791 | 0,000941185 | gtp binding protein                            |
| SampleTS2_Locus_32_Transcript_9/12_Confidence_0.412_Length_3353  | -2,074221988 | 6,90E-11    | chloroplast processing enzyme-<br>like protein |
| Sample3_Locus_17152_Transcript_4/4_Confidence_0.000_Length_943   | -2,074698372 | 1,59E-14    | protein                                        |
| Sample1_Locus_2956_Transcript_31/33_Confidence_0.039_Length_1166 | -2,081134827 | 0,000521338 | ---NA---                                       |
| SampleTS3_Locus_492_Transcript_6/12_Confidence_0.429_Length_1472 | -2,096553855 | 5,07E-24    | cysteine proteinase 7                          |
| Sample6_Locus_114_Transcript_25/103_Confidence_0.069_Length_1795 | -2,097050396 | 7,08E-16    | ---NA---                                       |
| Sample3_Locus_564_Transcript_17/23_Confidence_0.490_Length_2043  | -2,099022677 | 2,61E-08    | tubulin tyrosine ligase-like<br>member 5       |
| Sample1_Locus_1235_Transcript_39/59_Confidence_0.206_Length_1120 | -2,101639482 | 0,000236393 | peptidase s8                                   |
| SampleTS1_Locus_7276_Transcript_4/11_Confidence_0.475_Length_666 | -2,103386694 | 0,001306648 | cg12276-pa                                     |
| Sample1_Locus_2584_Transcript_6/14_Confidence_0.500_Length_2401  | -2,104250991 | 0,000284872 | membrane protein                               |

|                                                                     |              |             |                                                   |
|---------------------------------------------------------------------|--------------|-------------|---------------------------------------------------|
| Sample6_Locus_6748_Transcript_31/33_Confidence_0.467_Length_2454    | -2,125213532 | 0,000380697 | binding protein                                   |
| Sample6_Locus_16912_Transcript_4/6_Confidence_0.286_Length_1521     | -2,125975068 | 0,003283182 | 4-diphosphocytidyl-2-c-methyl-d-erythritol kinase |
| Sample6_Locus_164_Transcript_81/296_Confidence_0.015_Length_2930    | -2,131537729 | 0,00054768  | dna annealing helicase and endonuclease zranb3    |
| SampleTS1_Locus_3611_Transcript_4/7_Confidence_0.462_Length_614     | -2,139849704 | 0,000262077 | ---NA---                                          |
| SampleTS3_Locus_806_Transcript_24/43_Confidence_0.183_Length_786    | -2,142072675 | 0,000631648 | ---NA---                                          |
| SampleTS1_Locus_12176_Transcript_7/17_Confidence_0.314_Length_1653  | -2,157206534 | 1,32E-11    | ---NA---                                          |
| Sample6_Locus_4663_Transcript_6/12_Confidence_0.170_Length_579      | -2,167511192 | 0,000315198 | ---NA---                                          |
| Sample1_Locus_5968_Transcript_19/21_Confidence_0.286_Length_1498    | -2,194782008 | 4,78E-09    | ---NA---                                          |
| Sample3_Locus_1308_Transcript_9/13_Confidence_0.071_Length_370      | -2,195842493 | 3,39E-09    | ---NA---                                          |
| SampleTS2_Locus_4824_Transcript_5/6_Confidence_0.273_Length_488     | -2,198708593 | 1,04E-07    | ---NA---                                          |
| SampleTS1_Locus_254_Transcript_196/372_Confidence_0.001_Length_443  | -2,19882253  | 8,44E-07    | ---NA---                                          |
| SampleTS1_Locus_13851_Transcript_18/18_Confidence_0.024_Length_1396 | -2,201924111 | 0,000149958 | ---NA---                                          |
| Sample6_Locus_63_Transcript_47/50_Confidence_0.006_Length_1338      | -2,205830977 | 0,002333506 | ---NA---                                          |
| Sample1_Locus_9000_Transcript_6/6_Confidence_0.000_Length_1173      | -2,209896637 | 0,000315198 | cytoplasmic protein                               |
| SampleTS1_Locus_6361_Transcript_2/3_Confidence_0.143_Length_443     | -2,215727952 | 1,58E-12    | ---NA---                                          |
| Sample1_Locus_2707_Transcript_26/33_Confidence_0.394_Length_976     | -2,230697099 | 2,79E-05    | ---NA---                                          |
| Sample6_Locus_6789_Transcript_15/28_Confidence_0.060_Length_623     | -2,231932516 | 6,75E-05    | ---NA---                                          |
| Sample1_Locus_1235_Transcript_40/59_Confidence_0.388_Length_1852    | -2,232761103 | 0,000850812 | peptidase s8                                      |
| Sample6_Locus_284_Transcript_17/22_Confidence_0.067_Length_1947     | -2,233999107 | 7,63E-10    | glycosyl hydrolase                                |
| SampleTS3_Locus_14002_Transcript_6/6_Confidence_0.083_Length_934    | -2,235105763 | 8,05E-08    | xylosyltransferase 1-like                         |
| Sample6_Locus_5920_Transcript_21/36_Confidence_0.090_Length_804     | -2,239469172 | 0,000889011 | ---NA---                                          |

|                                                                    |              |             |                                                               |
|--------------------------------------------------------------------|--------------|-------------|---------------------------------------------------------------|
| SampleTS1_Locus_3105_Transcript_11/16_Confidence_0.333_Length_1763 | -2,250735466 | 2,44E-09    | origin recognition complex subunit 5                          |
| Sample3_Locus_11361_Transcript_22/29_Confidence_0.310_Length_825   | -2,263280982 | 0,001485698 | sumo-activating enzyme subunit 1a                             |
| Sample3_Locus_22_Transcript_30/37_Confidence_0.227_Length_1347     | -2,268314269 | 7,63E-05    | protein                                                       |
| SampleTS2_Locus_154_Transcript_3/9_Confidence_0.083_Length_762     | -2,277978756 | 0,005906303 | beta tubulin                                                  |
| Sample1_Locus_17297_Transcript_5/12_Confidence_0.429_Length_705    | -2,285537041 | 0,001003556 | ---NA---                                                      |
| Sample1_Locus_8585_Transcript_6/6_Confidence_0.000_Length_1145     | -2,298887546 | 4,81E-07    | short-chain dehydrogenase                                     |
| Sample1_Locus_10351_Transcript_10/10_Confidence_0.077_Length_635   | -2,299476625 | 6,93E-08    | ---NA---                                                      |
| Sample1_Locus_2272_Transcript_43/67_Confidence_0.374_Length_2859   | -2,309534758 | 7,16E-05    | dihydroxy-acid dehydratase                                    |
| Sample3_Locus_1335_Transcript_24/25_Confidence_0.041_Length_339    | -2,333071121 | 3,51E-07    | ---NA---                                                      |
| Sample6_Locus_16758_Transcript_4/8_Confidence_0.500_Length_907     | -2,346150962 | 0,001542052 | ---NA---                                                      |
| Sample1_Locus_756_Transcript_7/11_Confidence_0.158_Length_3868     | -2,34837064  | 2,81E-05    | dna topoisomerase i                                           |
| Sample3_Locus_4646_Transcript_14/15_Confidence_0.029_Length_1668   | -2,352595867 | 1,54E-10    | low quality protein: protein mss51 mitochondrial- partial     |
| SampleTS1_Locus_22837_Transcript_11/14_Confidence_0.526_Length_924 | -2,39139727  | 0,003090512 | ---NA---                                                      |
| Sample1_Locus_15457_Transcript_19/32_Confidence_0.195_Length_1455  | -2,404879208 | 0,003687535 | ---NA---                                                      |
| SampleTS2_Locus_12903_Transcript_9/9_Confidence_0.036_Length_1543  | -2,412822134 | 0,009194502 | ---NA---                                                      |
| Sample6_Locus_2848_Transcript_16/17_Confidence_0.521_Length_1276   | -2,416349978 | 4,54E-06    | rhodanese-like protein                                        |
| SampleTS1_Locus_10387_Transcript_7/8_Confidence_0.100_Length_886   | -2,420257487 | 2,34E-16    | ---NA---                                                      |
| SampleTS2_Locus_4494_Transcript_52/54_Confidence_0.066_Length_1160 | -2,42791585  | 4,21E-27    | flagellar associated protein                                  |
| Sample3_Locus_1698_Transcript_7/9_Confidence_0.111_Length_1910     | -2,428386045 | 3,18E-11    | dna repair helicase xpb2                                      |
| Sample3_Locus_5595_Transcript_14/17_Confidence_0.357_Length_4068   | -2,434689916 | 5,38E-05    | vacuolar protein sorting-associated protein 13                |
| Sample6_Locus_212_Transcript_219/511_Confidence_0.006_Length_869   | -2,437344026 | 0,004951932 | ---NA---                                                      |
| Sample6_Locus_12426_Transcript_3/4_Confidence_0.400_Length_834     | -2,438978198 | 5,38E-06    | peptidyl-prolyl cis-trans isomerase cyp20- chloroplastic-like |
| Sample3_Locus_95_Transcript_4/17_Confidence_0.131_Length_655       | -2,441724945 | 1,96E-05    | ---NA---                                                      |
| Sample1_Locus_542_Transcript_8/17_Confidence_0.237_Length_776      | -2,445794505 | 5,04E-07    | ---NA---                                                      |
| SampleTS2_Locus_4494_Transcript_43/54_Confidence_0.036_Length_2339 | -2,44757448  | 1,44E-32    | flagellar associated protein                                  |

|                                                                    |              |             |                                                                        |
|--------------------------------------------------------------------|--------------|-------------|------------------------------------------------------------------------|
| SampleTS2_Locus_5721_Transcript_5/6_Confidence_0.607_Length_568    | -2,452036873 | 0,003420044 | ---NA---                                                               |
| Sample1_Locus_698_Transcript_20/51_Confidence_0.176_Length_1608    | -2,458266665 | 0,001473552 | lipoxygenase homology domain-containing protein 1-like                 |
| Sample3_Locus_6557_Transcript_6/15_Confidence_0.238_Length_1079    | -2,472348669 | 4,28E-06    | ---NA---                                                               |
| SampleTS1_Locus_4936_Transcript_10/10_Confidence_0.062_Length_1298 | -2,495548532 | 1,00E-22    | protein                                                                |
| Sample3_Locus_5271_Transcript_4/11_Confidence_0.609_Length_982     | -2,505929498 | 0,000436114 | lipoxygenase homology domain-containing protein 1                      |
| Sample1_Locus_5155_Transcript_7/10_Confidence_0.073_Length_908     | -2,51231203  | 0,000263379 | protein                                                                |
| Sample6_Locus_9242_Transcript_4/7_Confidence_0.143_Length_489      | -2,54340117  | 5,84E-05    | ---NA---                                                               |
| Sample1_Locus_12063_Transcript_8/10_Confidence_0.605_Length_1236   | -2,54406752  | 8,81E-05    | anaphase-promoting complex subunit 1-like                              |
| SampleTS3_Locus_6406_Transcript_2/4_Confidence_0.571_Length_915    | -2,546566491 | 0,000177177 | rdx family protein                                                     |
| Sample6_Locus_3169_Transcript_9/10_Confidence_0.095_Length_1673    | -2,563047123 | 7,34E-10    | ---NA---                                                               |
| Sample1_Locus_891_Transcript_5/17_Confidence_0.605_Length_956      | -2,580128926 | 3,08E-10    | ---NA---                                                               |
| Sample6_Locus_6014_Transcript_15/22_Confidence_0.088_Length_1106   | -2,626940589 | 0,001444434 | ---NA---                                                               |
| SampleTS2_Locus_8321_Transcript_17/19_Confidence_0.062_Length_1174 | -2,627953921 | 1,29E-10    | ---NA---                                                               |
| Sample6_Locus_2327_Transcript_13/56_Confidence_0.080_Length_1002   | -2,628934143 | 6,62E-05    | pyruvate kinase                                                        |
| Sample6_Locus_5516_Transcript_4/8_Confidence_0.500_Length_1972     | -2,63109958  | 5,03E-14    | signal peptide protein                                                 |
| Sample1_Locus_16475_Transcript_4/9_Confidence_0.667_Length_385     | -2,633570838 | 0,00297646  | ---NA---                                                               |
| SampleTS1_Locus_1688_Transcript_11/14_Confidence_0.620_Length_1966 | -2,637826341 | 8,67E-11    | hypothetical protein<br>AURANDRAFT_72102                               |
| SampleTS2_Locus_4463_Transcript_16/21_Confidence_0.644_Length_2034 | -2,647681007 | 3,51E-14    | calcineurin-like metallo-phosphoesterase superfamily protein isoform 1 |
| Sample3_Locus_980_Transcript_9/22_Confidence_0.438_Length_635      | -2,675859927 | 0,00049421  | ---NA---                                                               |
| Sample3_Locus_1064_Transcript_33/42_Confidence_0.288_Length_1479   | -2,692183498 | 0,000160422 | calcineurin-like metallo-phosphoesterase-like protein                  |
| Sample6_Locus_4215_Transcript_14/29_Confidence_0.069_Length_739    | -2,714920494 | 2,28E-05    | threonine synthase                                                     |
| Sample1_Locus_12415_Transcript_7/8_Confidence_0.618_Length_1569    | -2,738593424 | 0,009296495 | ---NA---                                                               |
| Sample3_Locus_933_Transcript_3/19_Confidence_0.308_Length_408      | -2,79092102  | 6,49E-17    | ---NA---                                                               |
| Sample3_Locus_6164_Transcript_6/16_Confidence_0.426_Length_1550    | -2,827859223 | 4,17E-07    | membrane protein                                                       |
| SampleTS1_Locus_2149_Transcript_13/29_Confidence_0.042_Length_389  | -2,848960603 | 0,000722404 | ---NA---                                                               |
| Sample1_Locus_681_Transcript_58/104_Confidence_0.018_Length_1409   | -2,85121685  | 6,57E-06    | ---NA---                                                               |
| Sample6_Locus_1528_Transcript_8/12_Confidence_0.071_Length_642     | -2,909010686 | 8,33E-09    | ---NA---                                                               |
| Sample3_Locus_10861_Transcript_6/9_Confidence_0.353_Length_1071    | -2,918713867 | 0,000837388 | ---NA---                                                               |
| SampleTS2_Locus_14071_Transcript_7/7_Confidence_0.000_Length_3360  | -2,938889499 | 0,004501318 | 3'-cyclic-nucleotide phosphodiesterase                                 |

|                                                                   |              |             |                                                                                       |
|-------------------------------------------------------------------|--------------|-------------|---------------------------------------------------------------------------------------|
| Sample1_Locus_3589_Transcript_4/12_Confidence_0.280_Length_964    | -2,944840286 | 4,45E-32    | ---NA---                                                                              |
| Sample6_Locus_1055_Transcript_5/6_Confidence_0.062_Length_1635    | -2,969203727 | 7,91E-10    | tho complex subunit 2-like                                                            |
| Sample1_Locus_33312_Transcript_1/1_Confidence_1.000_Length_501    | -3,036442953 | 0,000223529 | ---NA---                                                                              |
| Sample1_Locus_698_Transcript_45/51_Confidence_0.188_Length_1524   | -3,065360527 | 3,21E-05    | lipoxygenase homology domain-containing protein 1                                     |
| Sample1_Locus_10463_Transcript_11/22_Confidence_0.155_Length_1079 | -3,068529817 | 0,000144037 | conserved repeat domain protein                                                       |
| Sample6_Locus_3025_Transcript_27/53_Confidence_0.325_Length_2010  | -3,07771913  | 1,96E-05    | alpha- -sialyltransferase st3gal ii                                                   |
| SampleTS1_Locus_24134_Transcript_1/3_Confidence_0.571_Length_859  | -3,110005857 | 0,004689671 | ---NA---                                                                              |
| SampleTS3_Locus_5834_Transcript_5/11_Confidence_0.267_Length_826  | -3,113790086 | 0,000643466 | ---NA---                                                                              |
| Sample1_Locus_12745_Transcript_7/13_Confidence_0.512_Length_1824  | -3,128369899 | 3,01E-05    | ---NA---                                                                              |
| Sample1_Locus_653_Transcript_4/10_Confidence_0.405_Length_667     | -3,145336822 | 0,004820274 | hypothetical protein SPRG_08339                                                       |
| SampleTS1_Locus_2195_Transcript_3/4_Confidence_0.500_Length_1846  | -3,271468392 | 0,003465067 | protein                                                                               |
| Sample3_Locus_4290_Transcript_16/18_Confidence_0.500_Length_1185  | -3,303889696 | 0,003311505 | soluble starch synthase iii-2                                                         |
| Sample6_Locus_4476_Transcript_9/27_Confidence_0.306_Length_489    | -3,314711495 | 2,10E-06    | chlorophyll a b binding protein                                                       |
| Sample1_Locus_1488_Transcript_6/9_Confidence_0.444_Length_1981    | -3,403168234 | 0,001542052 | glutamate dehydrogenase                                                               |
| Sample1_Locus_3352_Transcript_18/24_Confidence_0.140_Length_1042  | -3,407045438 | 0,000615931 | phytoene desaturase                                                                   |
| Sample6_Locus_44_Transcript_137/137_Confidence_0.029_Length_1637  | -3,475066266 | 1,01E-21    | putative nitrilase                                                                    |
| Sample1_Locus_324_Transcript_15/16_Confidence_0.121_Length_1009   | -3,509208914 | 0,003347531 | ---NA---                                                                              |
| Sample3_Locus_8914_Transcript_1/1_Confidence_0.000_Length_479     | -3,593388687 | 0,000579114 | predicted protein                                                                     |
| Sample3_Locus_3585_Transcript_6/10_Confidence_0.282_Length_715    | -3,710866346 | 0,001553804 | ---NA---                                                                              |
| SampleTS3_Locus_4205_Transcript_2/2_Confidence_0.333_Length_1332  | -3,721370692 | 2,34E-12    | protein serine threonine kinase                                                       |
| Sample6_Locus_701_Transcript_18/22_Confidence_0.224_Length_862    | -3,856418098 | 0,008697366 | ---NA---                                                                              |
| Sample3_Locus_2316_Transcript_26/28_Confidence_0.104_Length_1684  | -3,920785087 | 1,00E-08    | ankyrin repeat protein<br>rhodanese-like domain-containing protein chloroplastic-like |
| Sample1_Locus_4210_Transcript_5/6_Confidence_0.250_Length_669     | -4,016889188 | 6,43E-06    | like                                                                                  |
| Sample1_Locus_5959_Transcript_29/31_Confidence_0.207_Length_845   | -4,096133885 | 3,66E-10    | ---NA---                                                                              |
| Sample3_Locus_2912_Transcript_61/73_Confidence_0.104_Length_766   | -4,121681238 | 5,81E-25    | peptidase s8                                                                          |
| Sample1_Locus_2960_Transcript_23/25_Confidence_0.186_Length_1034  | -4,241456213 | 0,001561769 | hypothetical protein TVSG_00003                                                       |
| SampleTS3_Locus_2111_Transcript_1/31_Confidence_0.279_Length_495  | -4,399815735 | 3,31E-28    | ---NA---                                                                              |
| SampleTS2_Locus_1080_Transcript_7/9_Confidence_0.389_Length_2115  | -4,431923342 | 0,008311582 | ammonium transporter                                                                  |
| SampleTS2_Locus_11027_Transcript_1/1_Confidence_0.000_Length_1814 | -4,502312822 | 0,000266982 | lysine histidine transporter-like 5                                                   |

|                                                                  |              |             |                                                                                            |
|------------------------------------------------------------------|--------------|-------------|--------------------------------------------------------------------------------------------|
| Sample1_Locus_2253_Transcript_5/16_Confidence_0.447_Length_1433  | -4,50593177  | 0,005776197 | proteins containing btb poz and kelch involved in regulatory signal transduction processes |
| Sample1_Locus_5058_Transcript_19/34_Confidence_0.167_Length_1811 | -5,08638029  | 0,00057094  | ---NA---                                                                                   |
| Sample1_Locus_4388_Transcript_6/11_Confidence_0.257_Length_1023  | -5,202202604 | 7,12E-20    | hypothetical protein<br>COCSUDRAFT_64655                                                   |
| Sample1_Locus_8578_Transcript_16/27_Confidence_0.481_Length_1212 | -5,412816275 | 0,000491489 | ---NA---                                                                                   |
| Sample1_Locus_9106_Transcript_13/13_Confidence_0.400_Length_1902 | -5,435143368 | 3,55E-93    | high affinity phosphate probable                                                           |
| Sample3_Locus_2912_Transcript_60/73_Confidence_0.148_Length_730  | -5,621702636 | 9,51E-13    | carbohydrate binding family 6                                                              |
| Sample1_Locus_1524_Transcript_22/24_Confidence_0.000_Length_9683 | -5,773785844 | 8,17E-20    | polyketide synthase                                                                        |
| SampleTS3_Locus_9040_Transcript_2/2_Confidence_0.500_Length_554  | -6,448448404 | 1,67E-05    | ---NA---                                                                                   |

**Table S6.** List of nitrilase and nitrilase-like sequences retrieved from public repositories utilised to generate the ML tree.

| <b>Species</b>                         | <b>Enzyme note</b>          | <b>Source</b>        | <b>Accession Number</b> |
|----------------------------------------|-----------------------------|----------------------|-------------------------|
| <i>Ahnfeltiopsis flabelliformis</i>    | -                           | realDB               | -                       |
| <i>Arabidopsis thaliana</i>            | NIT3                        | Howden et al. (2009) | -                       |
| <i>Arabidopsis thaliana</i>            | NIT1                        | Howden et al. (2009) | -                       |
| <i>Arabidopsis thaliana</i>            | NIT4                        | Howden et al. (2009) | -                       |
| <i>Arabidopsis thaliana</i>            | NIT2                        | Howden et al. (2009) | -                       |
| <i>Arabidopsis thaliana</i>            | nitrilase/cyanide hydratase | GenBank              | NP_567340               |
| <i>Arachis duranensis</i>              | nitrilase-like protein 2    |                      | XP_015942307            |
| <i>Asparagus officinalis</i>           | nitrilase-like protein 2    | GenBank              | XP_020250716            |
| <i>Auxenochlorella prototechoides</i>  | nitrilase-like protein 1    | UniProtKB            | XP_011396009            |
| <i>Brachypodium distachyon</i>         | nitrilase-like protein 2    | eggNOG               | XP_003575496            |
| <i>Brassica napus</i>                  | -                           | Howden et al. (2009) | -                       |
| <i>Brassica rapa</i>                   | NIT-T1                      | Howden et al. (2009) | -                       |
| <i>Brassica rapa</i>                   | NIT-T2                      | Howden et al. (2009) | -                       |
| <i>Brassica rapa</i>                   | NIT-T4                      | Howden et al. (2009) | -                       |
| <i>Chlamydomonas eustigma</i>          | hypothetical protein        | eggNOG               | GAX78444                |
| <i>Chlorella variabilis</i>            | hypothetical protein        | UniProtKB            | XP_005845331            |
| <i>Coccomyxa subellipsoidea C-169</i>  | carbon-nitrogen hydrolase   | GenBank              | XP_005648661            |
| <i>Dunaliella tertiolecta</i> CCMP1320 | -                           | MMETSP               | -                       |
| <i>Eucheuma denticulatum</i>           | -                           | realDB               | -                       |
| <i>Gracilaria chouae</i>               | -                           | realDB               | -                       |
| <i>Grateloupia filicina</i>            | -                           | realDB               | -                       |
| <i>Lupinus angustifolius</i>           | NIT4B                       | Howden et al. (2009) | -                       |
| <i>Lupinus angustifolius</i>           | NIT4A                       | Howden et al. (2009) | -                       |
| <i>Marchantia polymorpha</i>           | hypothetical protein        | GenBank              | PTQ36733                |
| <i>Medicago truncatula</i>             | carbon-nitrogen hydrolase   | GenBank              | KEH44534                |
| <i>Micromonas commode</i>              | carbon-nitrogen hydrolase   | GenBank              | XP_002503164            |
| <i>Nicotiana tabacum</i>               | NIT4A                       | Howden et al.        | -                       |



|                                             |                          |                         |              |
|---------------------------------------------|--------------------------|-------------------------|--------------|
|                                             |                          | (2009)                  |              |
| <i>Nicotiana tabacum</i>                    | NIT4B                    | Howden et al.<br>(2009) | -            |
| <i>Oryza sativa</i>                         | -                        | Howden et al.<br>(2009) | -            |
| <i>Panicum hallii</i>                       | hypothetical protein     | GenBank                 | PAN21099     |
| <i>Populus trichocarpa</i>                  | nitrilase-like protein 2 | UniProtKB               | XP_002316330 |
| <i>Raphidocelis subcapitata</i>             | nitrilase                | GenBank                 | GBF91685     |
| <i>Rosa chinensis</i>                       | nitrilase-like protein 2 | GenBank                 | XP_024176796 |
| <i>Selaginella moellendorffii</i>           | nitrilase-like protein 2 | UniProtKB               | XP_002968641 |
| <i>Setaria italica</i>                      | nitrilase-like protein 2 | GenBank                 | XP_004962940 |
| <i>Sorghum bicolor</i>                      | nitrilase-like protein 2 | eggNOG                  | XP_002442180 |
| <i>Tetraselmis striata</i> LANL1001         | -                        | MMETSP                  | -            |
| <i>Tetraselmis suecica</i>                  | -                        | Current study           | -            |
| <i>Volvox carteri</i> f. <i>nagariensis</i> | hypothetical protein     | UniProtKB               | XP_002956542 |
| <i>Zea mays</i>                             | NIT2                     | Howden et al.<br>(2009) | -            |
| <i>Zea mays</i>                             | NIT1                     | Howden et al.<br>(2009) | -            |
| <i>Zea mays</i>                             | nitrilase-like protein 2 | eggNOG                  | NP_001141322 |
